# Supplementary material for: The application of sudoscan for screening microvascular complications in patients with type 2 diabetes
Source: PeerJ. 2022 Mar 14;10:e13089. doi: 10.7717/peerj.13089 (PMC8929165; doi:10.7717/peerj.13089)
Supplement: Supplemental Information 1 [file peerj-10-13089-s001.xlsx]

## Sheet: SESSION_23-07-2020 16h11m37
Name	Gender	Age	Height	Weight	BMI	ESC right hand	ESC left hand	ESC right foot	ESC left foot	sudoscan 0normal 1abnormal	mean ESC in hands	mean ESC in foots	Nephrotic risk score	Hands_Asymmetry	Feet_Asymmetry	CAN risk score	BP	SP	Diabetes duration	coronary heart disease (1+; 0-)	hypertension (1+; 0-)	cerebral infarction (1+; 0-)	smoke (1+; 0-)	drink (1+; 0-)	DPN (1+; 0-)	DR (1+; 0-)	DKD (1+; 0-)	diabetes foot (1+; 0-)	HbA1c	F-CP	2hP-CP	UACR	Urinary creatinine	Urinary microalbumin	urinary albumin	Cr	eGFR	UA	cys c	TC	TG	LDL	HDL	Carotid plaque (1 soft plaque, 2 hard plaque, 3 mixed plaque)(ultrasonography)	Plaque thickness	Carotid intima-media thickness	VPT in left foot	VPT in right foot	meat VPT
As per the ICMJE Privacy and Confidentiality guidelines, identifying information (such as names, photographs, other personally-identifying data) should not be included in the submission.	1	69	1.51	60	26.3146	76.2636	75.3943	81.6087	79.7473	0	75.8289	80.678	55	1	2	30	136	84	9	0	0	0	0	0	1	1	1	0	7.71	1.01	3.5	99.18	4199	47.1	0	92	56.9543	431.4	1.14	3.62	1.31	2.51	0.62	3		1.2	12.0333	21.7333	16.8833
	0	63	1.58	70	28.0404	67.0315	73.3593	69.6311	71.4374	0	70.1954	70.5342	53	8	1	37	129	79	0.2	0	1	1	0	0	1	0	1	0	11.01	0.13	0.21				0	101.14	65.5497	345.93	1.37	5.84	0.89	3.45	1.88				#N/A	#N/A	#N/A
	1	59	1.49	45	20.2694	70.2133	73.9521	74.4483	72.4963	0	72.0827	73.4723	60	5	2	24	146	104	1	0	0	0	0	0	0	0	0	0	12.99	0.14	0.34	4.43	3989.9	2	0	72.42	61.9076	151.78	0.51	6.32	0.98	4.32	1.25	0		0.8	8.83333	9.66667	9.25
	1	40	1.65	51	18.7328	69.9961	74.7055	78.8525	82.1987	0	72.3508	80.5256	87	6	3	3	127	86	5	0	0	0	0	0	0	0	0	0	12.55	0.02	0.03	15.77	7963.9	14.2	0	72.86	86.0966	372.43	0.4	3.74	0.87	2.25	1.34	0		0.8	27.7667	37.5	32.6333
	0	46	1.69	70	24.5089	69.4734	77.9167	71.2345	61.9615	0	73.6951	66.598	70	11	12	22	140	80	22	1	1	0	0	0	1	1	0	0	7.79	0.54	0.54	4.72	5529.3	2.95	0	100.36	80.6437	546.7	0.72	3.61	2.01	2.35	0.91	3	1.9	0.9	20	21.6	20.8
	0	39	1.56	53	21.7784	79.3705	79.4045	73.4686	75.0016	0	79.3875	74.2351	82	0	2	10	128	83	0.1	0	0	0	0	0	0	0	0	0	9.31	0.21	0.35	12.55	21634	30.7	0	66	99.7605	215.7	0.54	4.37	0.6	2.32	1.7	0		0.8	#N/A	#N/A	#N/A
	0	82	1.8	160	49.3827	61.0643	67.9594	71.7572	68.9951	0	64.5119	70.3761	32	10	4	47	145	85	25	0	1	0	0	0	1	1	0	0	7.92	0.21	1.29	6.64	5109.57	3.84	0	96.35	118.468	315.33	1.07	3.54	0.66	1.98	1.3	0	0	1.1	4.86667	5.76667	5.31667
	0	59	1.67	55	19.721	71.3684	71.8783	87.0125	86.8899	0	71.6234	86.9512	78	1	0	14	130	80	14	0	1	0	0	0	1	0	0	0	8.19	0.04	0.34	2.73	11229	3.47	0	102	53.7221	263.9	0.95	2.72	0.66	1.45	1.21	0	0	0.9	#N/A	#N/A	#N/A
	1	70	1.51	53	23.2446	66.7039	67.7295	87.078	87.0785	0	67.2167	87.0782	66	1	0	19	133	68	7	0	1	0	0	0	0	0	1	0	15.04	0.37	0.85	499.69	3556.6	201	0.5	84.44	54.0419	370.34	1.25	8.74	5.58	4.96	1.19	2		0.9	10.0667	34.3667	22.2167
	1	54	1.55	63	26.2227	83.5145	85.7235	79.1916	78.9952	0	84.619	79.0934	70	2	0	26	148	78	15	0	1	0	0	0	1	1	0	0	6.9	0.26	0.67	21.2	5004	12	0	73	91.2896	225.7	0.81	6.22	1.42	4.07	1.33	0	0	0.9	0	0	0
	0	37	1.83	97	28.9647	78.1267	69.8191	77.2536	71.5347	0	73.9729	74.3941	84	10	6	18	140	104	3	0	0	0	0	0	0	0	0	0	12.43	0.33	0.5	24.29	3858	10.6	0	106	115.933	419.3		6.82	6.23	4.47	0.99	0	0	0.9	#N/A	#N/A	#N/A
	0	52	1.68	65	23.03	75.7405	64.3314	75.8565	76.694	0	70.036	76.2753	69	15	1	22	130	90	3	0	0	0	0	0	0	0	1	0	10.29	0.34	0.49	56.53	13843	88.5	0.5	84	83.7571	408.7		7.81	2.44	5.3	1.2	1	2.3	0.9	7.03333	8.73333	7.88333
	1	58	1.58	40	16.0231	77.234	78.546	83.3917	84.3646	0	77.89	83.8781	72	2	1	12	132	62	6	0	1	0	0	0	1	1	1	0	11.14	0.27	0.38	393.55	6897.2	307	0	55.35	72.8889	130.09		1.08	1.72	2.8	0.85	1	1.7	0.9	6.8	12.0333	9.41667
	1	65	1.7	67	23.1834	74.1393	76.438	81.3628	74.2795	0	75.2886	77.8212	56	2	8	27	161	89	12	0	1	0	0	0	1	1	1	0	10.09	0.82	0.76	1084.47	2397	294	2	170	36.3574	366.7	1.94	5.12	3.23	3.34	0.81	0	0	0.9	11.6333	27.8333	19.7333
	1	67	1.6	57	22.2656	71.1201	74.7255	81.2565	79.1769	0	72.9228	80.2167	57	5	2	25	152	84	10	0	1	0	0	0	0	1	0	0	7.69	0.5	0.96	29.39	10379	34.5	0.5	69	74.1743	213.1	0.59	3.9	1.53	2.28	1.4	3		0.9	4.16667	3.96667	4.06667
	1	63	1.55	50	20.8117	75.6556	72.861	74.9806	77.7522	0	74.2583	76.3664	57	3	3	25	165	101	15	0	1	0	0	0	1	1	0	0	6.67	1.76	3.06				2	248	19.0948	590.1	3.34	7.17	2.44	4.92	1.04				10.4	14.6667	12.5333
	1	53	1.66	69	25.0399	63.6327	64.0798	64.7898	62.6868	0	63.8563	63.7383	61	0	3	29	162	109	12	0	1	0	0	0	0	0	0	0	7.45	0.81		5.62	6118.2	3.89	0	67.4	109.55	294.41	0.69	5.7	2	3.77	1.08				7.83333	5.7	6.76667
	0	54	1.71	52	17.7832	66.4389	71.4664	79.176	81.5341	0	68.9527	80.355	71	7	3	14	141	105	7	0	0	0	1	0	0	0	0	0	9.27	0.23	0.63	12.72	12930.7	18.6	0	96.17	57.1962	381.19	1.17	7.19	2.27	5.17	0.92	1	3.7	0.9	21.5	25.6333	23.5667
	1	63	1.6	65	25.3906	67.3804	70.0288	73.3748	73.0589	0	68.7046	73.2169	55	4	0	32	167	99	8	0	0	0	0	0	0	0	0	0	12.03	0.41	1.08	6.17	4073	2.84	0	71	86.7063	300.2	0.62	4.55	2.19	3.05	0.95	0	0	0.9	#N/A	#N/A	#N/A
	1	72	1.5	44	19.5556	73.6585	63.2385	84.7217	82.3312	0	68.4485	83.5265	56	14	3	18	125	82	5	0	1	0	0	0	1	1	0	0	11.04	0.24	0.42	4.81	3674	2	0	68	54.12	217.8	0.58	3.09	1.21	1.91	0.87	3	1.7	1	#N/A	#N/A	#N/A
	0	49	1.68	75	26.5731	63.1411	71.0252	69.4572	73.9609	0	67.0832	71.7091	70	11	6	26	137	94	0.1	0	0	0	1	1	0	0	0	0	10.92	0.71	1.28	7.63	8458	7.3	0	80	104.934	365.1	0.82	5	2.39	3.28	0.89	0	0	0.9	16.1333	19.3667	17.75
	1	59	1.62	62	23.6244	81.109	83.5281	86.4195	87.9024	0	82.3185	87.1609	79	3	2	19	166	110	0.6	0	1	0	0	0	0	0	0	0	10.68	0.5	0.66	11.3	4273	5.46	0.5	73	84.6173	329.4	0.54	4.46	4.07	2.69	1.13	0	0	0	32.3333	37.4333	34.8833
	0	54	1.52	56	24.2382	71.6409	71.6957	68.2671	69.8092	0	71.6683	69.0381	63	0	2	27	124	75	0.03	0	0	0	0	0	0	0	0	0	14.09	0.34	0.4	20.59	3676	8.56	0	59	100.401	284.9	0.65						0	0	19.3333	13.8	16.5667
	1	74	1.48	53	24.1965	70.7956	74.7052	83.7679	84.1997	0	72.7504	83.9838	55	5	0	24	138	81	20	0	1	1	0	0	1	1	1	0	9.43	0.26	0.34	32.51	7425.2	27.3	0	91.04	47.2599	173.14	1.12	3.17	1.23	1.87	1.13	3		1	#N/A	#N/A	#N/A
	1	47	1.56	59	24.2439	70.2575	73.9979	73.3052	76.7559	0	72.1277	75.0305	74	5	5	20	157	107	0.01	0	1	0	0	0	0	0	0	0	10.91	0.4	0.81	7.65	11524	9.97	0	66	102.258	372.8		5.32	1.4	3.4	1.27	0	0	0	18.5333	17.4667	18
	0	50	1.62	75	28.578	60.7936	63.2795	75.9962	72.2789	0	62.0365	74.1376	70	3	5	28	138	89	6	0	1	0	1	1	0	0	0	0	12.11	0.52	0.85	5.01	7348	4.16	0	79	105.095	439.4	0.82	5.18	3.58	3.38	0.84	1		1	9.93333	13.6333	11.7833
	0	51	1.72	67	22.6474	78.7482	79.0099	82.1153	81.3649	0	78.879	81.7401	76	0	1	17	114	88	0.3	0	0	1	1	0	0	0	0	0	10.5	0.46	0.83	4.91	17312	9.61	0	93.96	78.0597	299.9	0.96	4.71	2.63	3.24	0.87	0	0	0.9	8.53333	16.4	12.4667
	0	56	1.7	60	20.7612	90.8701	86.1664	94.435	90.9568	0	88.5182	92.6959	110	5	3	0	119	85	12	0	0	0	0	0	1	0	0	0	9.33	0.29	0.45	3.93	14057	6.25	0	105	59.04	424.2	0.69	5.64	1.4	3.78	0.99	1		1	17.8	20.6	19.2
	0	58	1.77	76	24.2587	69.185	77.4371	70.7035	72.3548	0	73.3111	71.5291	60	10	1	30	119	85	0.2	0	0	0	0	0	1	0	0	0	12.95	0.21	0.81	6.04	9865.99	6.74	0	106.48	71.9887	402.13	1.03	5.56	1.09	3.73	1.12	0	0	0.9	#N/A	#N/A	#N/A
	0	50	1.68	57	20.1956	68.8023	75.4672	80.1519	77.4424	0	72.1348	78.7972	74	8	3	15	128	78	8	0	0	0	0	0	0	0	0	0	7.37	0.35	1	8.4	6272.99	5.96	0	48.15	131.047	240.52	0.9	3.57	0.78	2.12	1.22	1		1	7.23333	6.33333	6.78333
	1	76	1.65	60	22.0386	69.2744	73.4296	81.2854	78.127	0	71.352	79.7062	46	5	3	25	130	80	12	0	1	0	0	0	0	0	0	0	8.61	0.05	0.16	29.97	5428	18.4	0	93	50.7871	330.7	1.04	9.42	2.45	6.27	1.53	0	0	0.9	#N/A	#N/A	#N/A
	0	31	1.74	90	29.7265	74.9928	78.269	73.2719	73.2177	0	76.6309	73.2448	90	3	0	15	142	78	0.05	0	0	0	0	0	0	0	0	0	10.72	0.83	1.18	6.57	11696.9	8.69	0	93.02	129.717	502.36	0.7	5.91	9.27	3.31	0.71	0	0	0.9	19.9333	19.0667	19.5
	0	67	1.55	49	20.3954	72.2787	70.1843	83.7798	82.9489	0	71.2315	83.3643	61	2	1	20	151	68	8	0	1	0	0	0	0	0	0	0	7.5	0.33	1.15	9.08	9733.1	10	0	85.59	51.4045	222.43	1.01	6.01	2.22	3.78	1.48	0	0	1.2	#N/A	#N/A	#N/A
	1	44	1.6	62	24.2187	61.9587	65.8063	67.383	69.235	0	63.8825	68.309	73	6	2	19	132	89	3.5	0	0	0	0	0	0	0	0	0	11.59	0.5	1.04	10.51	7496	8.91	0	66	110.924	306.5	0.48	5.54	1.54	3.59	1.26	0	0	0.9	5.43333	6.06667	5.75
	1	55	1.62	67	25.5296	79.7285	76.7583	63.1608	64.4729	0	78.2434	63.8169	59	3	1	31	127	86	1	0	0	0	1	0	1	0	0	0	7.6	0.3	0.87	4.17	7217	3.4	0	64	109.451	242.3	0.68	5.06	2.41	3.51	0.88	0		1.2	17.2667	13	15.1333
	1	52	1.56	43	17.6693	68.1015	68.251	84.7669	85.7517	0	68.1763	85.2593	81	0	1	8	130	80	10	0	0	1	0	0	1	1	0	0	11.59	0.07	0.34	9.61	4529	4.92	0	72	64.6433	255.9	0.86	5.92	0.98	3.67	1.66	0	0	0.9	6.96667	10.8333	8.9
	0	46	1.68	62	21.9671	78.9945	83.8279	84.9209	84.2869	0	81.4112	84.6039	87	5	1	9	112	93	0.5	0	0	0	0	1	0	0	0	0	7	0.2	0.19	6.84	4733	3.66	0	78	91.9031	350.5	0.74	4.55	0.84	2.79	1.23	0		0.9	29	18.8667	23.9333
	0	53	1.58	58	23.2335	76.3739	82.4419	80.7573	77.8757	0	79.4079	79.3165	71	7	3	21	147	72	0.15	0	1	0	0	0	0	0	0	0	10	0.11	0.28	9	13656	13.9	0	83	74.7781	318.2	0.86	6.06	0.94	3.96	1.52	3		1.2	#N/A	#N/A	#N/A
	1	69	1.7	70	24.2215	67.6957	73.1462	76.5426	75.7045	0	70.421	76.1235	51	6	1	30	127	88	10	0	0	0	0	0	1	0	0	0	12.55	0.68	1.07	21.43	6394.06	15.5	0	100.94	60.5617	331.17		4.38	1.19	3.02	0.96	0		0.9	7.8	9.3	8.55
	1	27	1.63	76	28.6048	62.0193	64.7202	81.5352	81.5845	0	63.3697	81.5599	103	4	0	6	110	80	0.03	0	0	0	0	0	1	0	1	0	11.13	1.16	1.65	40.81	11309	52.2	0	66.05	159.928	382.72	0.5	3.86	1.65	2.5	0.85				30.4	17.9667	24.1833
	0	69	1.75	78	25.4694	66.8057	78.7238	79.7656	73.8332	0	72.7647	76.7994	51	15	7	31	136	84	13	0	1	1	0	0	0	0	0	0	10.2	0.33	0.8				2	87	78.2959	276.4	0.83	3.42	2.35	2.1	0.7				20.2	27.7667	23.9833
	0	43	1.64	72	26.7698	61.3269	67.2827	72.6215	70.6984	0	64.3048	71.6599	76	8	2	21	116	81	13	0	1	0	0	0	0	0	0	0	8.17	0.28	0.29	3.93	14839.3	6.59	0	92.5	92.8683	363.32	0.56	4.88	0.87	3.3	1.12	0	0	0.9	17.7667	17.6333	17.7
	0	39	1.72	71	23.9995	70.6255	81.8797	80.8871	79.9434	0	76.2526	80.4153	88	13	1	10	120	70	0.01	0	0	0	1	1	0	0	0	0	10.25	0.57	0.62				0.5	84	105.004	188.8	0.64	13.76	14.86	0.6	4.64	0	0	0.9	#N/A	#N/A	#N/A
	1	65	1.56	60	24.6548	74.4483	71.0568	91.6491	91.9174	0	72.7526	91.7832	93	4	0	10	125	80	6.5	0	0	0	0	0	0	0	1	0	7.51	0.14	0.92	46.46	5861	30.8	0	75	73.8	332.7	0.96	5.56	1.22	3.3	1.57	2		0.9	#N/A	#N/A	#N/A
	1	63	1.55	74	30.8012	78.9188	76.7555	70.2585	74.5483	0	77.8372	72.4034	55	2	6	40	130	75	12	0	1	1	0	0	1	1	0	0	11.8	0.16	0.49	23.13	12309	32.2	0	84	83.435	364.1	0.9	8.24	1.67	5.83	1.15	3		1.5	#N/A	#N/A	#N/A
	1	73	1.55	42	17.4818	67.4918	68.8282	78.9466	76.8237	0	68.16	77.8851	48	2	2	19	112	74	1	0	0	0	0	0	1	0	0	0	12.41		0.29	20.51	11168	25.9	0	60	57.687	147.6	0.82	3.07	1.28	2.26	0.34	1		1	22.6333	21.2	21.9167
	0	50	1.63	62	23.3355	77.9956	78.6558	77.8501	80.9939	0	78.3257	79.422	75	1	3	19	120	90	0.01	0	0	0	1	0	0	0	0	0	10.21	0.34	0.77	3.9	21126	9.33	0	82	83.7	390.6	0.82	5.67	2.68	3.78	0.95	0		0.9	#N/A	#N/A	#N/A
	0	53	1.7	66	22.8374	72.295	72.4592	91.3868	91.0656	0	72.3771	91.2262	102	0	0	4	144	83	0.1	0	0	0	1	1	1	0	0	0	11.01	0.26	0.83	5.3	4353	2.61	0	81	87.1933	204.1		5.15	4.19	3.27	0.93				#N/A	#N/A	#N/A
	0	35	1.75	78	25.4694	78.1939	75.2107	83.7771	84.3411	0	76.7023	84.0591	98	3	0	6	123	86	3.5	0	0	0	0	1	0	0	0	0	11.98	0.23	0.36	4.83	26920.5	14.7	0	82.93	121.472	409.71	0.6	5.2	1.29	3.15	1.54	0		0.9	9.36667	11.9	10.6333
	1	64	1.58	59	23.634	74.6499	75.6915	76.3102	75.5302	0	75.1707	75.9202	56	1	0	29	133	77	13	0	0	0	0	0	0	1	0	0	7.19	0.29	0.53	6.08	2910	2	0	76	72.57	291.8	0.7	4.76	0.89	2.92	1.35	2		1	37.0667	38.1	37.5833
	1	64	1.58	52	20.83	68.8309	73.1982	81.136	77.9534	0	71.0145	79.5447	59	5	3	23	145	75	7.5	0	1	0	0	0	0	0	0	0	12.01	0.29	0.81	5.53	7885	4.93	0	74	65.6886	327.7	0.63	5.02	1.21	2.89	1.68	2		1	17.8	19.1667	18.4833
	0	55	1.68	84	29.7619	82.2829	77.0799	74.8877	73.2101	0	79.6814	74.0489	64	6	2	34	110	70	12	0	1	0	1	0	1	1	1	0	9.11	0.91	1.71	19.86	6633.8	14.9	0	225.45	38.9541	604.09	1.72	3	2.33	1.9	0.71	0		0.9	9.66667	12.1	10.8833
	0	41	1.73	66	22.0522	76.7869	72.8243	80.6227	80.8003	0	74.8056	80.7115	86	5	0	9	108	49	0.1	0	0	0	0	0	1	0	0	0	11.79	0.19	0.58	6.07	30291	20.8	1	97	82.8538	507.2		6.28	2.92	4.08	1.19	0		0.9	24.8	23.1	23.95
	0	46	1.68	69	24.4473	67.7495	65.172	75.2708	74.8196	0	66.4607	75.0452	75	4	0	19	168	98	2	0	1	0	1	1	0	0	1	0	7.79	0.74	0.95	276.13	3202	100	0	129	61.8433	436	1.13	5.34	1.85	3.58	1.1	3		1	9.66667	12.8333	11.25
	0	65	1.63	61	22.9591	80.4238	82.4785	80.6586	74.1	0	81.4511	77.3793	56	2	8	27	145	90	10	0	0	1	0	0	1	0	0	0	6.38	0.31	1.2	6.4	6410	4.64	0	92	61.1658	399.1	0.84	4.82	1.87	3.18	1.1	3		1	9.66667	12.8333	11.25
	0	67	1.69	66	23.1084	60.6532	61.2815	79.1765	79.0149	0	60.9674	79.0957	56	0	0	27	120	89	3	0	0	0	1	0	1	0	1	0	6.86	0.49	1.65	76.28	6387	55.1	0	113	52.4437	505.2	1.31	3.71	1.72	2.18	1.06				#N/A	#N/A	#N/A
	0	59	1.65	62	22.7732	60.1855	66.4814	82.099	78.9506	0	63.3334	80.5248	66	9	3	24	124	84	14	0	0	1	0	0	0	0	0	0	12.88	0.19	0.39	4.48	13709.2	6.95	0	92.31	66.9165	293.67	0.85	5.02	1.24	3.26	1.22				6.7	9.53333	8.11667
	0	37	1.68	90	31.8878	85.106	84.2724	85.2714	85.8073	0	84.6892	85.5393	99	1	1	15	124	80	1.5	0	0	0	0	0	1	0	0	0	10.4	0.64	1.21	7.85	20959	18.6	0	83	137.375	531.3	0.71	3.8	2.84	2.84	0.74	0		0.9	9.36667	8.83333	9.1
	0	66	1.57	66	26.7759	79.1803	79.0701	73.6146	71.8602	0	79.1252	72.7374	51	0	2	35	157	85	5	0	1	0	0	0	1	0	0	0	11.03	0.2	0.23	18.99	3148	6.76	0	70.18	85.5987	3.07		6.19	4.54	3.98	1.05				#N/A	#N/A	#N/A
	0	54	1.58	60	24.0346	81.8921	84.6266	76.7891	78.3731	0	83.2594	77.5811	68	3	1	24	146	93	10	0	0	0	0	0	0	0	0	0	10.15	0.22	0.44	10.07	5453	6.21	0	61	104.046	334.9		7.87	1.95	5.27	1.55				#N/A	#N/A	#N/A
	1	57	1.68	75	26.5731	83.5745	83.6439	80.592	80.7843	0	83.6092	80.6882	68	0	0	28	121	80	0.002	0	0	0	0	0	0	0	1	0	10.96	0.59	0.82	155.44	12457	219	0.5	79	96.9209	352.6	0.61	6.03	1.83	4.01	1.32	0		0.9	13.9667	18.0333	16
	0	64	1.65	70	25.7117	79.2917	79.4154	71.4741	74.8272	0	79.3535	73.1506	54	0	5	33	196	110	5	0	1	0	1	0	1	1	1	0	10.89	0.71	1.14				1	95	68.88	365.6	0.97	5.42	1.15	3.72	0.97				#N/A	#N/A	#N/A
	0	70	1.58	50	20.0288	68.0524	66.5696	77.6839	78.6595	0	67.311	78.1717	51	1	1	23	214	118	12	0	1	0	0	0	1	0	1	0	6.46	1.1	1.56	3078.18	6606.5	2300	2	670.49	6.42068	430.13	4.04	6.95	1.29	4.3	1.91	2		0.9	#N/A	#N/A	#N/A
	0	69	1.73	75	25.0593	71.9961	74.78	68.821	65.8801	0	73.3881	67.3505	45	4	4	34	153	96	12	0	1	1	0	0	0	0	0	0	10.43	0.3	0.67				0	84.29	77.7049	349.28	0.82	5.27	1.5	3.55	0.97	3	3.5	1	12.3667	9.9	11.1333
	1	66	1.67	65	23.3067	81.4319	81.0102	84.3008	82.0147	0	81.221	83.1578	62	0	2	24	152	95	12	0	1	0	0	0	1	0	0	0	12.24	0.7	0.96	12.18	6577.6	9.06	0	86.24	68.6027	410.28		4.76	1.21	3.08	1.21	0		0.9	#N/A	#N/A	#N/A
	0	53	1.7	68	23.5294	89.2652	89.1565	90.9018	90.343	0	89.2108	90.6224	99	0	1	7	148	100	0.45	0	1	0	1	0	0	0	0	0	8.17	0.57	0.82	14.05	9440	15	0	85	85.608	566.8	0.7	6.33	4.2	3.81	1.46	1		1	#N/A	#N/A	#N/A
	0	56	1.62	72	27.4348	63.5998	74.1571	76.2536	69.8936	0	68.8785	73.0736	63	13	7	32	150	96	22	0	0	0	0	0	0	1	0	0	13.25	0.26	0.3	24.91	7595.15	21.4	0	86.11	86.39	382.68	0.77	4.45	1.06	2.86	1.44				27.9333	24.5	26.2167
	1	52	1.58	57	22.8329	68.6719	75.0597	80.763	78.6159	0	71.8658	79.6895	73	8	2	19	143	82	12	0	1	0	0	0	1	0	0	0	11.68	0.28	0.21	21.6	6713.94	16.4	0	70.88	87.044	297.11		6.41	0.89	4.29	1.55	0		0.9	37.8333	41.0667	39.45
	1	60	1.58	57	22.8329	73.9811	77.1394	88.077	88.0256	0	75.5602	88.0513	80	3	0	17	174	102	2	0	1	0	0	0	0	0	0	0	10.27	0.47	1.21	11.58	7788.2	10.2	0	67.4	83.2166	228.59	0.8	5.82	1	3.87	1.28	0		1.2	#N/A	#N/A	#N/A
	1	58	1.49	49	22.0711	67.1573	74.1323	86.2227	83.4098	0	70.6448	84.8162	74	9	3	19	127	86	3	0	0	0	0	0	1	0	0	0	8.26	0.52	1.35	5.6	5114	3.24	0	71	69.6076	448.2		5.84	1.56	4	1.01	0		0.9	6.46667	8.6	7.53333
	1	62	1.5	50	22.2222	65.051	69.3827	80.3822	82.0391	0	67.2169	81.2107	64	5	2	24	125	80	12	0	0	0	0	0	0	0	0	0	11.27	0.6	0.18	3.86	4585.77	2	2	61.67	77.785	446.86	0.71	5.08	2.35	3.42	0.84	0		0.9	19.5667	28.4333	24
	1	44	1.55	70	29.1363	66.0683	64.4082	69.0282	69.6932	0	65.2382	69.3607	74	3	1	26	152	94	12	0	0	0	0	0	1	1	0	0	6.98	0.16	0.24	29.38	3550.9	11.8	0	61.9	133.532	292.76	0.61	3.19	0.66	1.78	1.13	0		1.1	7.16667	9.53333	8.35
	0	33	1.73	83	27.7323	83.018	84.0084	77.4595	72.2704	0	83.5132	74.865	89	1	6	13	136	96	0.3	0	0	0	1	1	0	0	0	0	10.81	0.3	0.58	43.07	19913	97	0.5	88	124.132	433	0.69	6.13	8.37	3.25	0.88	0		0.9	16.5333	22.8	19.6667
	1	68	1.5	49	21.7778	71.9374	79.432	82.6955	78.7534	0	75.6847	80.7245	56	8	4	24	120	80	15	0	0	0	0	0	0	0	0	0	11.42	0.18	0.65	7.96	6168	5.55	0	86	50.4586	330.7	0.73	7.57	3.67	5.1	1.09	0		1.5	#N/A	#N/A	#N/A
	1	84	1.55	50	20.8117	60.2506	69.628	82.4302	75.3412	0	64.9393	78.8857	37	14	8	24	149	94	24	0	1	1	0	0	1	0	0	0	10.17	0.78	0.63	17.44	6032	11.9	0	97	35.5052	221.4	1	5.29	1.96	3.82	0.86	2		1	#N/A	#N/A	#N/A
	1	81	1.6	55	21.4844	72.4724	64.8896	68.7484	60.2145	0	68.681	64.4815	31	9	13	29	144	77	30	0	1	0	0	0	1	0	0	0	7.56	0.21	0.5	6.35	6943	4.99	0	64	62.3648	327.9	1.14	2.18	0.52	0.95	1.06	2		1	18.1	16.4667	17.2833
	1	65	1.61	61	23.533	72.5038	74.6335	75.4375	75.4461	0	73.5686	75.4418	54	2	0	29	188	108	0.1	0	1	0	0	0	0	0	1	0	10.03	0.48	1.82	114.82	5560	72.2	0.5	69	81.5543	257.5	0.71	5.11	1.55	3.32	1.31	2		0.9	10.6333	17.1667	13.9
	0	59	1.58	59	23.634	66.3812	75.69	84.9873	85.878	0	71.0356	85.4326	74	13	1	21	111	68	0.01	1	0	0	1	0	0	0	0	1		0.65		2.79	27713	8.74	0	93	63.2061	424.7	0.87	2.15	1.18	1.18	0.68	1		1	#N/A	#N/A	#N/A
	1	57	1.63	70	26.3465	84.467	85.0608	82.5578	82.7733	0	84.7639	82.6655	71	1	0	26	130	80	4	0	0	0	0	0	0	0	0	0	6.73	0.94	2.01	4.16	6820	3.21	0	74	96.5716	392.8	0.78	7.94	2.59	5.13	1.26	0		0.9	#N/A	#N/A	#N/A
	0	68	1.68	59	20.9042	71.9653	69.4353	87.48	85.8863	0	70.7003	86.6832	67	4	1	17	171	97	5.5	0	1	0	1	0	1	0	1	0	11.43	0.3	0.4	567.29	7715	495	2	106	49.2928	355.4	0.93	4.62	1.74	3.06	0.96	1		1	37.0333	26.2333	31.6333
	0	64	1.68	65	23.03	61.2118	62.6088	68.8312	71.7273	0	61.9103	70.2793	52	3	4	30	130	81	15.5	0	1	0	1	0	0	1	0	0	11.83	0.12	0.16	4.07	5232.9	2.41	0	86.59	70.1721	230.75	0.88	8.83	0.82	5.95	1.97	0		0.9	8.13333	7.66667	7.9
	0	58	1.7	65	22.4913	70.7964	68.6598	82.868	80.5297	0	69.7281	81.6989	69	2	2	22	137	92	0.001	0	0	0	0	0	0	0	0	0	13.84	0.32	0.74	20.57	7478	17.4	0	77	85.1416	196	0.77	4.47	2.31	3.04	0.96	3		1	#N/A	#N/A	#N/A
	0	32	1.69	58	20.3074	68.494	68.1897	92.9697	91.449	0	68.3419	92.2093	132	0	2	0	126	80	0.3	0	0	0	1	0	0	0	0	0	13.35	0.25	0.2	5.05	13016	7.43	0	77	100.061	479.5	0.58	6.46	6.65	4	0.97				#N/A	#N/A	#N/A
	0	61	1.55	46	19.1467	73.9983	77.0757	78.1963	80.4676	0	75.537	79.3319	62	3	2	21	154	81	0.01	0	1	0	1	0	0	1	0	0	11.56	0.18	1.15	4.8	5745	3.12	0	61	73.2757	402.4		4.71	0.89	3.12	1.02	2		1.3	#N/A	#N/A	#N/A
	1	58	1.57	48	19.4734	64.1599	69.3073	83.2253	85.1658	0	66.7336	84.1955	73	7	2	16	110	70	0.01	0	0	0	0	0	0	0	0	0	12.84	0.13	0.05	8.64	11153	10.9	0		#DIV/0!										12.8	12.7667	12.7833
	0	64	1.76	73	23.5666	77.9191	80.7318	79.532	75.8868	0	79.3254	77.7094	57	3	5	28	159	87	30	0	1	0	0	0	1	0	0	0	6.7	0.29	0.67	45.07	16401	83.6	0.5	95	71.832	488.8	0.77	3.64	1.46	2.36	0.8	3		1.1	#N/A	#N/A	#N/A
	1	74	1.55	55	22.8928	78.647	81.9973	86.6807	85.3346	0	80.3221	86.0076	59	3	2	20	165	94	12	0	0	0	0	0	0	0	0	0	10.37	0.35	0.89	43.33	2897.3	14.2	0	67.04	66.6005	276.94	0.74	3.69	1.77	2.15	1.09	3		1.3	#N/A	#N/A	#N/A
	1	55	1.55	60	24.974	60.7249	65.5161	67.9484	66.835	0	63.1205	67.3917	61	7	1	29	128	86	7	0	0	0	1	0	1	0	0	0	7.38	0.21	0.85	8.34	5324.4	5.02	0	57.59	108.925	375.56	0.58	4.37	0.77	2.83	1.1	1		1.3	12.5333	17.4667	15
	1	64	1.52	59	25.5367	73.8108	78.5886	80.1203	82.1284	0	76.1997	81.1243	61	6	2	29	120	80	12	0	0	0	0	0	0	0	0	0	6.34	0.41	2.66	20.06	4673	10.6	0	63	87.5448	320.2	0.55	5.46	1.5	3.55	1.13	0		0.8	7	5.93333	6.46667
	1	48	1.63	70	26.3465	73.8643	79.2977	86.0112	83.064	0	76.581	84.5376	84	6	3	17	120	83	1.2	0	1	0	0	0	1	0	0	0	12.64	0.37	0.55	9.81	8379	9.3	0	62.59	126.557	192.52	0.53	5.43	7.35	3.14	0.8				#N/A	#N/A	#N/A
	1	54	1.62	52	19.8141	84.2457	82.9374	79.6174	81.9398	0	83.5915	80.7786	72	1	2	16	163	100	12	0	1	0	0	0	1	0	0	0	9.31	0.36	1.03	42.75	7280.3	35.2	0	73.62	74.7156	157.93	0.78	8.46	3.31	5.51	1.59	0		0.9	#N/A	#N/A	#N/A
	0	49	1.72	65	21.9713	75.4085	78.7726	83.3885	82.6573	0	77.0906	83.0229	81	5	0	13	147	77	0.01	0	0	0	0	1	0	1	0	0		0.43	0.66				0	62	117.346	371		4.9	6.53	1.23	0.67	0		0.8	10.6333	18.0333	14.3333
	1	71	1.62	55	20.9572	60.5974	67.5291	64.2463	64.7957	0	64.0633	64.521	42	10	1	29	150	100	17	0	1	0	0	0	1	0	0	0	11.12	0.14	0.19	21.87	2825.6	6.99	0	64.51	72.3585	191.43	0.6	5.86	0.83	3.22	1.82	0		1.1	#N/A	#N/A	#N/A
	1	75	1.56	67	27.5312	68.2458	77.2197	81.9393	82.0616	0	72.7328	82.0004	50	11	0	31	171	103	1.2	0	1	0	0	0	1	1	1	1	7.94	0.59	1.71	104.98	3588	42.6	0	90.13	59.4325	349.99	0.89	4.78	3.11	3.12	0.87	3		1	33.0667	28.9667	31.0167
	1	66	1.58	45	18.026	65.4365	68.2514	68.7809	71.6827	0	66.844	70.2318	50	4	4	23	181	105	5.5	0	1	0	0	0	1	0	0	0	6.31	0.24	1.67	14.94	9235	15.6	0	60	68.265	164.7	0.56	6.43	0.73	3.2	2.68	0		1.1	8.1	10.7	9.4
	1	64	1.53	56	23.9224	61.474	66.8146	66.4901	70.7715	0	64.1443	68.6308	51	8	7	32	168	87	12	0	1	0	0	0	1	0	0	0	6.58	0.31	1.15	23.55	6609	17.6	0	78.02	67.0966	448.76	0.77	5.55	1.47	3.59	1.41	0		0.8	12.4667	15.7333	14.1
	1	63	1.52	50	21.6413	64.3275	70.0114	80.1038	80.0015	0	67.1695	80.0527	61	8	0	24	171	111	7.5	0	1	1	0	0	1	0	0	0	8.19	0.5	0.97	2.5	7152	2.02	0	84	56.375	446.8	0.83	6.74	4.42	4.6	0.88	2		0.8	9.7	18.8667	14.2833
	1	69	1.55	52	21.6441	72.5246	72.1366	78.3249	78.4444	0	72.3306	78.3846	53	1	0	25	166	78	10	0	0	0	0	0	1	0	0	0	9.62	0.43	0.55	7.85	3288	2.92	0	70	64.8737	416.4		5.14	1.8	3.4	1.2	2		0.9	9.46667	10.2	9.83333
	0	49	1.73	68	22.7204	76.3323	77.1363	79.0139	78.5587	0	76.7343	78.7863	75	1	0	17	136	78	0.1	0	0	0	0	0	1	0	0	0	12.57	0.24	0.2	6.27	2822	2	0	87	87.4855	221.7	0.68	4.29	0.65	2.82	0.99	0		0.8	6.03333	7.76667	6.9
	0	50	1.67	60	21.5139	64.7759	66.7698	84.6658	84.1016	0	65.7728	84.3837	82	2	1	12	141	77	2	0	0	0	1	0	0	0	0	0	14.85	0.14	0.18	3.11	5921	2.08	0	81	82	179.9	0.61	5.51	1.09	3.38	1.51	0		0.8	31.4333	27.8	29.6167
	0	32	1.79	85	26.5285	71.2203	72.0395	69.0698	76.2677	0	71.6299	72.6688	89	1	9	12	139	94	0.01	0	0	0	0	1	0	0	0	0	13.61	0.2	0.26	355.44	9204	370	0	94	120.121	400.7	0.65	4.74	2.56	3.14	0.66	0		0.8	33.8667	33.5333	33.7
	0	56	1.67	69	24.7409	80.664	81.609	75.785	74.9053	0	81.1365	75.3452	64	1	1	28	113	82	0.55	0	0	0	0	0	0	1	0	0	5.61	0.79	4.34	3.33	9031.9	3.4	0	105.31	67.6961	359.02	1.41	5.94	1.12	4.12	1.25	0		1.3	7.1	7.7	7.4
	0	75	1.68	80	28.3447	62.0557	64.9752	74.7137	73.5682	0	63.5154	74.141	42	4	1	36	157	92	13	1	1	0	1	0	1	0	0	1	6.62	0.37	1.02	186.75	10700	226	1	126.88	50.4098	396.58	1.45	3.98	1.19	2.6	0.88	0		1.4	50	48.5667	49.2833
	0	76	1.64	60	22.3081	69.8425	70.4064	79.3286	79.3595	0	70.1245	79.344	46	0	0	25	152	67	5.5	0	0	1	0	0	1	0	0	0	12.72	0.54	0.72	13.69	6521.5	10.1	0	76.3	61.903	326.22		6.16	1.11	3.98	1.55	0		0.8	6.93333	7.3	7.11667
	1	48	1.57	57	23.1247	77.9698	84.8633	81.4088	83.6599	0	81.4166	82.5343	81	8	3	15	126	80	16	0	0	0	0	0	0	0	0	0	8.42	0.44	0.94	131.47	5360	79.7	0	61	105.74	514.7	0.52	4.33	5.29	2.54	0.99	0		0.8	47.9667	47.1333	47.55
	1	25	1.66	66	23.9512	75.9661	71.4062	84.4397	83.9775	0	73.6861	84.2086	109	6	0	0	126	81	0.01	0	0	0	0	0	0	0	0	0	12.85	0.25	0.62	17.44	4685.11	9.24	0	39.53	236.167	526.83	0.49	11.94	14.7	2.65	2.48	0		0.8	#N/A	#N/A	#N/A
	0	57	1.71	80	27.3588	69.8052	72.4953	66.4894	70.0887	0	71.1502	68.2891	59	2	5	34	132	82	10	0	1	1	0	0	0	1	0	0	10.67	0.47	0.9	17.09	3989.2	7.71	0	96.21	84.8893	427.48	0.73	4.66	0.95	3	1.05	3		1.3	9.76667	12.6333	11.2
	1	53	1.56	67	27.5312	67.6652	66.607	65.7836	71.854	0	67.1361	68.8188	64	1	8	31	128	90	9	0	0	0	0	0	0	1	0	0	12.01	0.22	0.54	9.87	10477	11.7	0.5	72	99.5787	289.9	0.68	6.22	3.26	4.08	1.13	3		1	9.06667	11.5	10.2833
	1	66	1.55	53	22.0604	74.7942	76.4409	82.517	82.4878	0	75.6175	82.5024	61	1	1	23	152	91	12	0	0	1	0	0	0	0	0	0	7.11	0.28	0.83	18.7	8274	17.5	0	78	61.8469	379.3	0.81	6.76	1.19	4.4	1.3	0		0.8	18	20.8	19.4
	0	47	1.72	61	20.6193	69.5342	66.774	80.2038	78.686	0	68.1541	79.4449	78	4	1	12	141	94	0.1	0	0	0	0	0	0	0	0	0	10.66	0.46	0.81	6.84	20930.3	16.2	0	80.47	86.7129	340.77		6.91	2.03	4.55	1.28	0		0.8	20.3333	11.9333	16.1333
	0	54	1.58	56	22.4323	69.5092	66.43	61.4625	60.9492	0	67.9696	61.2059	60	5	0	26	152	94	13	0	1	0	0	0	1	0	0	0	13.77	0.26	0.9	447.63	4701.01	238	0.5	72.29	81.9433	372	0.93	6.23	2.84	3.85	1.33				#N/A	#N/A	#N/A
	1	49	1.58	55	22.0317	75.8696	71.2948	82.3829	77.9848	0	73.5822	80.1838	77	6	4	16	112	69	3.5	0	0	0	0	0	0	0	0	0	9.41	0.56	0.81	7.41	11623	9.74	0	66.54	92.518	365.16		4.45	1.84	3.27	0.56	1	1.2	1.4	#N/A	#N/A	#N/A
	1	65	1.6	46	17.9687	67.3375	70.3676	86.0768	68.4512	0	68.8525	77.264	56	4	20	20	153	103	10	0	1	0	0	0	0	1	1	0	10.45	0.16	0.31	3304.72	6742.22	2520	2	70.04	60.5868	415.62	1.05	7.74	1.09	4.86	1.93	1		1.2	#N/A	#N/A	#N/A
	1	54	1.58	72	28.8415	70.3535	71.0658	81.4192	84.0868	0	70.7097	82.753	75	1	3	27	152	93	7.5	0	0	0	0	0	0	1	0	0	10.23	0.48	1.54	14.04	15115	24	0	70	108.802	373.9	0.76	4.53	4.85	2.75	0.79	0		0.9	15.5667	21.5333	18.55
	1	69	1.58	62	24.8358	64.4051	67.1918	82.2527	83.6955	0	65.7984	82.9741	59	4	2	26	131	94	6.5	0	1	1	0	0	1	1	0	0	8.5	0.42	0.95	12.62	2690	3.84	0	58	93.3528	304.4	0.63	4.49	1.92	2.64	1.14	0		0.8	8.53333	8.5	8.51667
	1	58	1.61	58	22.3757	61.9743	67.7453	67.2749	63.1862	0	64.8598	65.2306	57	8	5	29	143	97	10	0	1	1	0	0	0	0	0	0	10.25	0.39		39.62	4864.4	21.8	0	60.74	96.3102			5.55	6.46	3.21	1.08				14.0333	15.2333	14.6333
	1	38	1.63	70	26.3465	67.4994	72.263	66.3366	64.8029	0	69.8812	65.5697	79	6	1	18	132	85	9	0	0	0	0	0	0	0	0	0	9.55	0.35	0.94	15.28	13138.7	22.7	0	57.95	151.548	306.43		4.99	1.69	3.2	1.03				20.8667	28.3	24.5833
	1	59	1.57	100	40.5696	64.2057	67.7062	70.9556	71.0984	0	65.956	71.027	58	5	0	46	123	96	12	0	1	0	0	0	1	0	0	0	8.48	0.83	0.68	125.25	17295.7	245	0	74.07	134.508	514.04	0.83	4.55	1.32	3.09	0.92	0		0.8	11.4667	8.56667	10.0167
	0	53	1.76	63	20.3383	77.0954	75.5079	78.5069	82.7181	0	76.3017	80.6125	73	1	4	16	126	86	0.5	0	0	0	0	0	0	0	0	0	7.98	0.35	1.77	5.24	15041	8.91	0.5	79	85.3371	383.3	0.71	4.57	1.51	3.02	0.96	0		0.8	5.53333	5.86667	5.7
	0	62	1.52	60	25.9695	83.8259	82.2512	91.4207	88.4454	0	83.0385	89.9331	85	2	3	18	125	70	2.5	0	0	0	0	0	1	0	0	0	12.69	0.19	0.61	16.69	18751	35.4	0.5	75	76.752	271.5		6.82	2.95	4.48	1.23	0		0.8	20.2667	17.3667	18.8167
	0	54	1.64	51	18.9619	76.7519	75.1966	83.7258	82.2316	0	75.9743	82.9787	75	2	2	13	132	86	6	0	0	0	0	0	1	1	0	0	13.66	0.17	0.7	5.37	4708	2.86	0	79	68.2884	446.6	0.76	5.05	1.67	3.4	0.88	3		0.9	11.8333	15.7333	13.7833
	1	67	1.55	48	19.9792	74.9124	80.0632	76.8105	81.793	0	77.4878	79.3017	56	6	6	22	120	75	1.5	0	0	1	0	0	1	0	0	0	12.83	0.27	0.58	36.59	4181	17.3	0	71	60.7031	430.9		4.74	1.17	2.84	1.54	1		0.9	13.4333	16.1667	14.8
	0	66	1.71	70	23.939	65.5507	72.2576	75.8833	73.5955	0	68.9042	74.7394	53	8	2	30	152	85	22	0	1	0	1	1	0	0	1	0	7.64	0.35	0.87	90.33	7439	76	0	118	53.9949	366.9	1.08	5.13	1.24	3.26	1.22	2		1.3	8.6	10.2667	9.43333
	1	61	1.54	41	17.2879	63.3375	65.1033	74.32	69.8736	0	64.2204	72.0968	57	3	5	22	135	83	0.7	0	1	0	0	0	1	1	0	0	13.49	0.18	0.19	41.6	3273.2	15.4	0	99.81	39.9155	461.24		3.98	1.91	2.49	1.13	0		0.8	12.8333	21.2333	17.0333
	0	51	1.76	76	24.5351	81.8838	82.2724	83.0802	83.0014	0	82.0781	83.0408	78	0	0	19	126	88	12	0	0	0	0	0	0	0	0	0	8.01	0.46	0.99	9.94	14762.8	16.6	0	114.69	72.5409	462.12	0.97	5.09	1.73	3.42	1.19				#N/A	#N/A	#N/A
	0	57	1.65	72	26.4463	68.9485	71.9743	73.0152	68.0561	0	70.4614	70.5357	60	4	6	32	187	102	0.1	0	1	0	1	0	0	1	0	0	10.43	0.44	1.54	35.91	11005	44.7	0.5	82	89.64	326		5.54	1.69	3.48	1.028	0		1.3	32.9	45.6667	39.2833
	0	72	1.67	62	22.231	66.1435	72.2859	66.7779	76.5832	0	69.2147	71.6805	44	8	12	29	137	83	0.1	0	1	0	0	0	0	0	0	0	9.9	0.11	0.54	3.23	5862	2.14	0	101	51.3434	378.7	0.88	4.55	0.69	2.9	1.33	2		1.4	7.16667	8.73333	7.95
	0	36	1.73	62	20.7157	77.3957	83.5759	82.0979	79.4535	0	80.4858	80.7757	92	8	3	3	123	88	1.2	0	0	0	1	0	1	0	0	0	3.57	0.31	0.68	15.12	19883.9	34	0	102.21	77.5955	362.53	0.67	4.36	0.89	2.63	1.23	0	0	0.8	6.2	7.56667	6.88333
	0	77	1.7	60	20.7612	76.7686	76.8776	78.2085	77.6809	0	76.8231	77.9447	43	0	0	24	122	88	0.1	0	0	0	0	0	1	0	1	0	17.04	0.14	0.18	43.89	10495	52.1	0.5	108	43.05	326.5	1.16	3.77	1.61	2.46	0.84	0		1.4	18.8667	21.2	20.0333
	1	62	1.58	59	23.634	76.0186	76.2598	81.002	85.15	0	76.1392	83.076	66	0	4	25	159	93	7.5	0	1	0	0	0	1	1	0	0	13	0.39	0.68	124.58	6998	98.6	0	93	60.8652	381.8	1.06	6.33	1.91	4.24	1.01	1	2.8	0.9	#N/A	#N/A	#N/A
	0	64	1.68	71	25.1559	74.0634	75.1642	80.2487	68.7218	0	74.6138	74.4852	55	1	13	32	132	88	3	0	1	1	0	0	1	0	0	0	8.39	0.66	1.06	4.16	4253	2	0	90	73.7453	314.8	0.75	3.92	0.92	2.29	1.35	0		0.8	7.2	8.43333	7.81667
	1	44	1.58	47	18.8271	88.8188	89.1098	93.5015	91.5105	0	88.9643	92.506	121	0	2	0	132	91	3	0	0	0	0	0	0	0	0	0	10.34	0.12	0.35	9.52	8191	8.82			#DIV/0!							0		0.8	#N/A	#N/A	#N/A
	0	70	1.68	64	22.6757	63.9122	69.7009	83.4636	81.8416	0	66.8065	82.6526	57	8	1	24	128	71	13	0	0	1	1	0	0	1	0	0	11.08	0.65	0.85	77.02	9654	84.1	0.5	122	45.1672	454.4	1.31	6.21	3.89	4.09	0.81				11.2667	10.6333	10.95
	1	35	1.68	60	21.2585	78.2694	79.7469	79.2098	75.7256	0	79.0081	77.4677	89	2	3	5	118	78	8	0	0	0	0	0	1	0	0	0	7.59	0.5	0.5	5.97	7523	5.08	0	60	129.15	202.7	0.54	4.43	1.57	3.06	0.8				#N/A	#N/A	#N/A
	1	39	1.57	65	26.3702	61.7151	61.663	63.327	65.2401	0	61.6891	64.2836	77	0	3	19	115	80	3	0	0	0	0	0	0	0	0	0	11.56	0.38	0.32	246.18	10236.1	285	0	72.31	111.671	462.77		5.04	3.4	3.16	0.99	0		0.8	17.2667	33.2	25.2333
	0	53	1.72	68	22.9854	85.5509	87.1107	68.4276	70.459	0	86.3308	69.4433	64	1	2	25	142	93	10	0	0	0	1	1	0	1	0	0	5.95	0.3	2.31	6.56	14558	10.8	0	80	90.9585	285.3	0.76	3.61	2.78	2.16	0.83	2		1.3	18.8333	24.9333	21.8833
	1	56	1.55	53	22.0604	64.0973	70.3773	82.2879	84.153	0	67.2373	83.2204	73	8	2	19	151	82	0.2	0	1	0	0	0	0	0	0	0	15.61	0.16	0.17	4.92	4148	2.31	0	67	81.7307	144.9	0.58	3.88	0.66	2.57	1.13	0		0.8	#N/A	#N/A	#N/A
	1	68	1.55	65	27.0552	79.6438	80.2702	73.8051	72.4413	0	79.957	73.1232	49	0	2	35	151	92	3.5	0	1	0	0	0	1	0	0	0	9.46	0.59	2.12	6.9	10662.7	8.32	0	64.75	88.9019	337.19	0.55	4.65	1.99	2.93	0.99	0		0.9	#N/A	#N/A	#N/A
	1	50	1.53	50	21.3593	77.6987	69.1092	77.1503	73.5329	0	73.4039	75.3416	71	11	3	18	132	90	22	0	0	0	0	0	0	0	0	0	6.76	0.31	0.69				0	76.91	71.9672	178.77	0.96	5.1	1.33	3.25	1.28				11.7	11.7667	11.7333
	0	66	1.63	59	22.2063	75.7496	73.5269	80.6714	78.981	0	74.6383	79.8262	57	2	2	25	136	86	12	0	0	0	0	0	1	0	0	0	13.54	0.2	0.27	10.82	6383	7.81	0	85.97	62.4657	267.45		4.23	0.73	2.65	1.4	1		1.2	17.1333	21.4667	19.3
	0	71	1.75	82	26.7755	72.4041	68.75	80.4916	75.6571	0	70.577	78.0744	50	4	5	32	124	85	8	0	1	1	1	0	0	0	0	0	5.84	0.71	2.54		7765.8	2	0	98.24	70.8402	475.77	0.92	2.27	1.29	1.39	0.65	0		0.8	#N/A	#N/A	#N/A
	0	49	1.75	75	24.4898	69.208	72.5776	73.5794	70.7956	0	70.8928	72.1875	70	5	4	23	144	98	15	0	0	0	0	0	0	0	0	0	8.91	0.22	0.72	4.05	11945.4	5.47	0	93.27	90.0048	320.04		5.19	0.66	3.55	1.25	3	2.2	1	6.16667	6.53333	6.35
	0	68	1.7	55	19.0311	79.9072	80.8527	85.7051	86.0395	0	80.38	85.8723	65	1	0	15	126	75	2	0	0	0	0	0	1	1	1	0	13.13	0.33	0.34	21.66	10329.8	25.3	0	78.2	62.2864	326.52		4.82	0.93	3.04	1.02	0		0.8	15.2333	15.6	15.4167
	1	70	1.5	63	28	71.1508	68.9772	82.393	82.9201	0	70.064	82.6565	57	2	1	31	134	86	12	0	1	0	0	0	1	1	0	0	7.42	0.45	1.02	7.41	2388	2	0	72	75.3375	372.5	0.82	3.83	1.67	2.74	0.51	0		0.8	#N/A	#N/A	#N/A
	1	68	1.58	50	20.0288	73.6301	74.5607	76.2157	75.86	0	74.0954	76.0379	53	1	0	24	105	62	14	0	1	0	0	0	0	0	1	0	10.45	0.28	0.56	253.34	3734.3	107	0	74	59.8378	296.67	0.87	5.2	1.31	3.26	1.41	3		0.9	18.0333	19.7	18.8667
	1	60	1.6	62	24.2187	72.8165	71.8805	69.8521	73.2055	0	72.3485	71.5288	57	1	4	31	168	97	3	0	1	0	0	0	1	0	1	0	9.52	0.43	0.6	129.32	9367	137	0.5	58	105.186	301.3	0.55	3.06	2.06	1.71	1				6.46667	9.16667	7.81667
	0	59	1.75	74	24.1633	78.097	78.7728	86.4773	86.8554	0	78.4349	86.6663	77	1	1	20	127	82	17	1	0	0	0	0	0	1	1	0	9.44	0.48	0.66	47.8	5605	30.3	0	107	68.903	498.1	0.9	6.03	3.07	3.94	1.11	0		0.8	#N/A	#N/A	#N/A
	1	55	1.58	61	24.4352	66.9724	70.8856	81.5316	84.443	0	68.929	82.9873	74	5	2	22	140	90	7	0	0	0	0	0	0	0	0	1	9.11	0.33	1.55	8.04	14845.6	13.5	0	64.26	99.246	357.12		5.94	6.69	3.35	1.05	1		1.1	#N/A	#N/A	#N/A
	1	59	1.64	68	25.2826	86.9113	82.459	83.56	83.7721	0	84.6852	83.666	71	5	0	25	128	78	4.5	0	0	0	0	0	1	0	0	0	7.8	0.18	0.44	7.59	7595	6.52	0	71	95.4203	318.7	0.79	5.73	2.12	3.99	0.92	0		1.4	20	16.7	18.35
	0	72	1.5	49	21.7778	72.4784	78.581	80.0655	78.6525	0	75.5297	79.359	50	8	1	25	127	86	22	0	1	0	0	0	0	1	0	0	6.94	0.22	0.39	4.79	3688	2	0	89	46.049	268.4	1	6.05	0.74	3.81	1.83	2		0.8	7.63333	8.53333	8.08333
	1	62	1.63	75	28.2284	76.2686	80.7501	75.5578	76.5532	0	78.5094	76.0555	58	6	1	35	148	78	9	0	1	0	0	0	0	0	0	0	11.97	0.43	0.47				2	117	61.5	503.1	1.49	5.12	3.03	3.26	0.98	2		0.9	5.7	11	8.35
	0	60	1.5	49	21.7778	79.8492	81.4659	81.2585	82.1678	0	80.6575	81.7132	67	1	1	23	161	61	2	0	0	0	0	0	1	0	0	0	9.55	0.27	0.28	6.98	3570	2.82	0	61	79.0426	320.2	0.84	5.7	1.91	3.9	1.14	3		0.8	#N/A	#N/A	#N/A
	0	44	1.65	80	29.3848	66.3912	73.4268	66.4518	74.7279	0	69.909	70.5899	74	9	12	26	143	97	12	0	1	0	0	0	0	0	0	0	10.03	0.42	0.53	12.09	13597.5	18.6	0	85.33	110.704	495.66	0.77	6.86	11.13	3.01	0.73	0		0.8	#N/A	#N/A	#N/A
	1	65	1.58	56	22.4323	73.766	80.3013	82.9519	80.8959	0	77.0337	81.9239	61	7	2	24	124	75	5	0	0	0	0	0	1	0	0	0	8.81	0.3	1.29	29.31	11464	38	0.5	73	70.7671	341.3	0.78	3.93	5.2	2.43	0.62				12.7333	10.7333	11.7333
	0	55	1.72	57	19.2672	85.0576	87.0764	73.8167	75.0143	0	86.067	74.4155	65	2	1	19	136	89	13	0	0	0	0	0	1	0	0	0	8.55	0.1	0.54	14.74	9237.09	15.4	0	131.22	45.415	414.48	1.32	4.76	1.48	2.93	1.06	0		0.8	12.2	15.6333	13.9167
	1	60	1.58	60	24.0346	64.0007	65.3533	78.007	76.5005	0	64.677	77.2537	61	1	1	29	124	85	5.5	0	0	0	0	0	0	0	0	0	10.9	0.66	0.83	47.65	1555	8.38	0	64	92.25	242.4	0.7	5.17	1.68	3.58	0.78	0		0.9	11.3333	22	16.6667
	0	60	1.69	63	22.0581	75.4256	83.6507	84.8157	73.9677	0	79.5381	79.3917	64	10	12	25	144	79	13	0	1	0	1	0	1	1	1	0	10.83			559.07	5472	0.47	346	104	59.6077	473.4	1.14	3.89	0.97	2.52	0.97	0		0.8	#N/A	#N/A	#N/A
	1	50	1.6	51	19.9219	65.2211	77.8926	83.2662	82.2518	0	71.5568	82.759	79	16	1	12	130	80	0.2	0	0	0	0	0	0	0	0	0	11.51	0.2	1.2	9.67	16543.3	18.1	0	72.23	78.1628	291.62		5.89	0.93	3.71	1.96	0		0.8	#N/A	#N/A	#N/A
	0	81	1.42	55	27.2763	68.0218	72.6071	80.0383	77.707	0	70.3145	78.8726	40	6	2	33	134	77	20	0	1	1	0	0	1	1	1	0	7.92	0.33	2	189.5	10264.8	220	0.5	113.74	35.0919	433.66	1.8	5.97	3.06	3.94	1.04	2		0.8	#N/A	#N/A	#N/A
	0	45	1.7	74	25.6055	84.8729	84.7571	89.7757	88.2939	0	84.815	89.0348	100	0	2	7	144	89	0.2	0	0	0	1	1	0	0	0	0	10.81	0.3	0.39	4.27	18255	8.81	0.5	84	102.939	302.6	0.56	5.36	1.21	3.69	1.05	0		0.8	15.4333	18.2333	16.8333
	1	68	1.56	50	20.5457	60.6623	62.6052	73.8807	72.7769	0	61.6338	73.3288	50	3	1	26	120	78	12	0	0	1	0	0	1	0	0	0	9.81	0.3	0.43	46.91	9442	50.1	0	70	63.2571	272.4	0.74	3.93	2.08	2.38	0.98	0		0.8	13.1667	12.3667	12.7667
	1	62	1.63	65	24.4646	79.1681	80.7002	79.9537	75.8413	0	79.9342	77.8975	60	2	5	29	153	105	7.5	0	1	0	0	0	0	0	0	0	7.45	0.74	3.53	5.19	10715	6.29	0	74	84.2716	523.5		7.37	1.94	4.87	1.49	0		0.8	45.5667	39.8667	42.7167
	1	46	1.56	43	17.6693	67.1456	68.9095	80.5498	82.0764	0	68.0275	81.3131	81	2	1	6	110	76	13	0	0	0	0	0	0	1	1	0	12.79	0.13	0.21	83.19	6759.5	63.6	0	48.39	102.741	219.61	0.61	5.22	1.27	3.35	1.19	2		0.9	8.2	12.2333	10.2167
	0	48	1.75	71	23.1837	78.5448	80.8553	80.4491	77.6879	0	79.7001	79.0685	76	2	2	17	120	94	0.1	0	0	0	1	1	0	0	0	0	14.32	0.12	0.25	4.29	13527	6.57	0	83	96.7995	376.6	0.64	4.73	1.38	3.32	0.76	0		1.4	8.16667	8.8	8.48333
	0	66	1.7	58	20.0692	68.2204	72.1316	77.5216	84.849	0	70.176	81.1853	59	5	8	21	140	92	15	0	1	0	1	0	0	1	1	0	7.94	0.17	0.22	277.72	13658	429	0.5	110	47.9924	399.2	0.8	8.58	2.2	5.69	1.49	0		1.3	5.3	7.36667	6.33333
	1	66	1.58	65	26.0375	68.6774	64.7754	63.4831	69.9419	0	66.7264	66.7125	48	5	10	35	105	66	15	0	0	1	0	0	1	0	0	0	6.18	0.35	0.71	85.88	2512	24.4	0	92	64.3076	390.5	1.11	4.2	1.26	2.55	1.23	2		1	#N/A	#N/A	#N/A
	0	71	1.56	56	23.0112	63.6795	60.6017	86.0369	85.3406	0	62.1406	85.6887	62	4	1	21	145	86	22	0	1	1	0	0	0	1	0	0	6.65	0.6	1.07	35.6	2582.8	10.4	0.5	75.34	63.0836	75.34	401.29	5.82	1.52	3.26	2.04	3		0.9	9.73333	13.5667	11.65
	0	67	1.7	56	19.3772	76.44	67.8286	92.0699	90.8438	0	72.1343	91.4569	88	10	1	4	140	80	25	0	1	1	0	0	1	0	0	0	6.74	0.24	0.65	354.88	8994.2	361	0	158.96	31.6321	510.57	1.71	6.19	1.08	3.77	1.54	2		0.9	5.83333	8.86667	7.35
	1	65	1.54	52	21.9261	72.2193	67.8112	76.4146	72.0037	0	70.0152	74.2092	54	5	5	27	173	87	13	0	0	0	0	0	0	1	0	0	8.44	0.49	0.99	4.86	11194	6.15	0.5	90	53.3	323.4	1	7.25	2.17	4.9	1.37	3	2.3	0.9	11.6333	9.4	10.5167
	0	46	1.6	53	20.7031	75.7649	79.0624	86.7531	82.7309	0	77.4137	84.742	87	3	4	8	130	70	8.5	0	0	0	0	0	0	0	0	0	11.64	0.24	0.53	14.06	14145	22.5	0.5	58	105.653	242.2		4.39	4.49	2.71	0.87	0		0.8	17.4333	16.2333	16.8333
	1	61	1.6	62	24.2187	66.2341	67.413	75.6184	75.0058	0	66.8236	75.3121	59	1	1	30	120	80	12	1	1	0	0	0	1	0	0	0	12.96	0.53	0.62	7.78	2604	2.29	0	112	53.7905	454.8	1.22	2.97	2.25	1.59	0.95	0		0.8	4.53333	6.1	5.31667
	1	59	1.61	69	26.6193	77.686	79.9385	79.4634	79.6537	0	78.8123	79.5586	65	2	1	31	139	98	15	0	0	0	0	0	1	1	0	0	7.45	0.56	1.44	5.64	8161	5.21	0	75	91.6596	337.4	0.75	6.59	2.47	4.58	1.25	0		0.8	#N/A	#N/A	#N/A
	0	52	1.58	60	24.0346	72.1206	65.3417	84.983	83.5638	0	68.7312	84.2734	79	9	1	18	134	94	6	0	0	0	0	0	0	0	0	0	9.87	0.35	0.58	4.95	3572	2	0	67.94	95.5902	283.79	0.63	3.79	0.84	2.34	1.15	0		0.8	6.6	9.66667	8.13333
	1	65	1.52	62	26.8352	70.8765	72.3509	81.1093	82.3838	0	71.6137	81.7465	61	1	1	30	143	94	8	0	1	1	0	0	1	0	0	0	13.01	0.59	1.01	7.15	6020.6	4.87	0	93.63	61.0862	445.73	1.03	3.32	0.98	1.9	1.24	0		1.2	5.66667	5.26667	5.46667
	0	58	1.65	65	23.8751	83.6085	79.3985	88.5962	88.0889	0	81.5035	88.3425	83	5	1	17	151	99	12	0	0	0	0	0	0	1	1	0	12.58	0.16	0.2	220.14	9840	245	0.5	104	63.0375	275.2						0		0.8	7.4	13.3667	10.3833
	1	56	1.42	40	19.8373	61.5351	67.4829	73.6913	75.9298	0	64.509	74.8105	64	7	2	21	114	79	12	0	0	0	0	0	1	1	0	0	10.54	0.11	0.2	37.43	4134.2	17.5	0	77.14	53.5753	470.01	0.48	5.64	1.11	3.22	1.94				41.3667	50	45.6833
	1	62	1.5	60	26.6667	70.6827	66.498	75.5382	72.135	0	68.5904	73.8366	57	7	5	34	168	109	13	0	1	0	0	0	0	0	0	1	9.31	0.46	1.37	31.16	3291.5	11.6	0	70.44	81.7206	385.74	0.71	3.98	4.04	2.27	1.14	2		0.9	#N/A	#N/A	#N/A
	0	61	1.67	64	22.9481	66	68	70	70	0	67	70	55	2	0	30	124	74	17	0	0	0	0	0	0	0	0	0	7	0.34	1.14	2.67	21675.7	6.55	0	93.99	66.1653	431.2	0.57	3.75	1.1	2.16	1.14	0		0.9	8.8	10.4	9.6
	1	52	1.56	70	28.764	65	72	81	80	0	68.5	80.5	74	1	9	27	115	73	2	0	0	0	0	0	0	1	0	0	6.98	0.66	1.69	3.12	8003.5	2.82	0	65.65	115.412	284.33	0.65	5.92	0.83	3.88	1.55	0		0.8	20.7	20.8667	20.7833
	0	62	1.68	60	21.2585	82	78	84	82	0	80	83	67	2	4	21	128	80	7	0	1	0	0	0	0	0	0	0	11.75	0.14	0.19	13.67	9831.2	15.2	0	94.87	60.6767	373.77	0.73	4.2	1.63	2.62	1.32	0		1.2	46	31.1333	38.5667
	1	55	1.53	50	21.3593	71	75	68	65	0	73	66.5	60	4	5	25	149	88	14	0	0	0	0	0	1	0	1	0	8.23	0.2	0.34	74.94	12624.4	107	0	60.71	86.1061	273.7	0.53	4.63	0.87	2.74	1.58	0		0.8	8.86667	10.7667	9.81667
	1	54	1.56	39	16.0256	73.183	76.067	87.6815	87.3389	0	74.625	87.5102	85	3	1	4	121	69	1	0	0	0	0	0	1	0	0	0	11.61	0.18	0.26	11.11	6048.9	7.6	0	67.43	61.1808	150.88		4.92	0.78	3.09	1.52	0		0.9	#N/A	#N/A	#N/A
	1	64	1.5	46	20.4444	60.0756	62.9798	72.5581	72.0389	0	61.5277	72.2985	53	4	1	26	155	90	12	0	0	0	0	0	0	0	0	0	7.19	0.02	0.02	442.74	2296.6	115	0	73.38	58.6002	291.62	0.59	5.79	0.73	3.3	1.69	0		0.9	#N/A	#N/A	#N/A
	1	28	1.65	67	24.6097	65.8369	70.5828	83.6733	83.0371	0	68.2098	83.3552	104	7	1	0	125	71	0.001	0	0	0	0	0	0	0	0	0	11.27	0.19	0.4	6.27	13994	9.92	0	68	135.734	352.5	0.48	6.75	1.47	4.51	1.12	0		0.8	#N/A	#N/A	#N/A
	1	61	1.63	57	21.4536	69.1545	75.1763	69.4331	70.7837	0	72.1654	70.1084	55	8	2	28	119	68	5.5	0	1	0	0	0	1	1	0	0	12.77		0.016	6.19	9349	6.54	0	63	87.9157	270.9		4.98	0.59	2.96	1.8	0		1.5	22.5	30.1667	26.3333
	0	55	1.81	75	22.8931	60.2171	70.2943	73.778	77.0229	0	65.2557	75.4005	65	14	3	24	117	78	3	0	0	1	1	0	0	0	0	0	5.95	0.09	0.75	5.5	10661.2	6.63	0	72.7	107.858	391.04	0.84	4.02	0.76	2.69	1.11	1	1.8	0.9	15.8667	20.4667	18.1667
	1	53	1.52	40	17.313	74.3627	73.9106	84.8887	83.5467	0	74.1367	84.2177	78	0	1	9	121	77	0.6	0	0	0	0	0	0	0	0	0	9.5	0.016		19.29	3470	7.57	0.5	0.91	4703.74	443.5	0.91	4.4	1.5	2.14	1.92				33.6	32.4667	33.0333
	0	62	1.72	80	27.0416	64.2319	63.4169	63.7479	63.6627	0	63.8244	63.7053	52	1	0	37	116	93	0.05	0	1	0	0	0	0	0	0	0		0.3	0.69	80.51	9554	87	0	126	60.9143			6.63	2.29	4.3					#N/A	#N/A	#N/A
	0	44	1.75	71	23.1837	54.5606	54.5829	69.8275	68.7987	1	54.5718	69.3131	74	0	1	18	127	87	0.5	0	0	0	0	0	1	0	1	0	8.88	0.68	1.28	32.69	21611	79.9	1	93	90.1471	401.8	0.65	6.23	2.29	4.41	0.86	0		0.8	18.6333	27.6	23.1167
	0	63	1.6	65	25.3906	72.846	77.1045	67.8533	50.6369	1	74.9752	59.2451	49	5	25	36	143	104	2	0	1	0	0	0	1	1	1	0	11.35	0.27	0.52	108.74	7082	87.1	0	137	44.9354	435.7	1.55	3.14	3.73	1.97	0.49	3		1	#N/A	#N/A	#N/A
	1	71	1.6	50	19.5312	26.8161	28.2227	21.3273	19.8969	1	27.5194	20.6121	35	3	4	31	141	66	6	0	0	0	0	0	1	1	0	0	9.93	0.016	0.016	5.96	3845	2.59	0	102	41.6029	323.9	1.09	5.75	1.67	3.47	1.38	3		1.2	13.4	18.5	15.95
	1	37	1.61	62	23.9188	65.3648	68.3473	57.2354	68.6773	1	66.856	62.9563	79	4	17	14	140	85	18	0	0	0	0	0	1	0	0	0	6.61	0.016	0.016	5.18	12544	7.35	0	67	117.236	155.7	0.65	6.39	0.74	4.07	1.63	0	0	0.9	14.3667	15.2333	14.8
	0	28	1.76	53	17.11	83.7622	4.79737	27.6335	33.9486	1	44.2798	30.791	83	94	17	1	133	98	1.5	0	0	0	1	0	0	0	0	0	14.95	0.04	0.05	17.32	6279.64	12.3	0	63.21	115.508	221.92	0.54	15.55	16.72	0.88	1.57				12.9667	10.0333	11.5
	1	40	1.58	52	20.83	53.9574	44.5592	65.1961	68.5193	1	49.2583	66.8577	77	16	5	12	131	94	0.001	0	0	0	0	0	1	0	0	0	6.32	0.02	0.02	22.77	1265.6	3.26	0	89.13	71.7604	425.72	0.61	3.95	2.37	2.58	0.59				29.3333	35.8333	32.5833
	0	58	1.71	64	21.8871	40.2243	42.7432	12.8994	14.2613	1	41.4838	13.5803	48	6	7	32	157	90	38	0	0	0	0	0	1	1	0	0	6.68	0.06	0.02	3.67	4814.3	2	0	86.24	74.8497	237.19	0.92	4.44	0.7	2.38	1.73	0		0.8	26.4333	19.4667	22.95
	0	42	1.68	55	19.487	76.7172	77.6804	51.3526	48.1721	1	77.1988	49.7624	70	1	5	14	128	88	0.2	0	0	0	0	0	0	0	0	0	16.79	0.06	0.12	7.22	9350.5	7.64	0	88.37	75.0221	358.23		6.1	2.62	4.08	1.1	0		0.8	#N/A	#N/A	#N/A
	0	48	1.65	74	27.1809	69.8397	71.656	29.46	30.6122	1	70.7479	30.0361	61	2	6	31	116	66	15	0	1	1	0	0	1	1	0	0	8.21	0.57	0.64	17.19	11472	22.3	0	73.92	113.282	382.03	0.72	5.38	1.45	3.96	0.72	3		1.3	18.5	32.3333	25.4167
	0	64	1.68	46	16.2982	15.9114	14.7396	6.94709	6.49977	1	15.3255	6.72343	41	6	14	26	103	67	12	0	0	0	0	0	1	0	0	0	9.52						0	76.67	56.0856	346.94	0.58	3.65	0.61	1.9	1.47				6.26667	4.96667	5.61667
	1	65	1.6	49	19.1406	33.9511	24.154	47.0649	44.7453	1	29.0525	45.9051	44	29	4	29	142	86	6	0	1	1	0	0	1	1	1	0	9.36	0.13	0.14	278.83	3615	114	0	79	57.2184	153.9	0.69	5.63	1.25	3.58	1.36				#N/A	#N/A	#N/A
	1	60	1.55	47	19.563	43.7517	49.5166	79.1651	78.9423	1	46.6341	79.0537	63	12	0	22	137	90	12	0	1	0	0	0	1	0	0	0	9.45	0.02	0.12	5.79	6414.9	4.2	0	64.22	72.0149	120.99	0.59	5.48	0.73	3.01	2.11	2	1.9	1	#N/A	#N/A	#N/A
	0	35	1.65	55	20.202	72.2656	73.8532	42.5225	41.3791	1	73.0594	41.9508	76	2	4	10	124	84	2	0	0	0	0	0	1	0	1	0	8.69	0.09	0.02	158.56	3881	69.6	0	79	89.9146	186	0.84	3.64	1.3	2.32	0.73				11.6667	16.5	14.0833
	0	57	1.72	65	21.9713	54.9244	57.193	45.3057	48.7167	1	56.0587	47.0112	53	3	8	30	174	118	7.5	0	0	0	1	0	0	0	0	0	10.96	0.02	0.02	16.4	8085.4	15	0	79.51	83.4593	336.26	0.77	3.46	0.9	2.12	0.93	0		0.8	#N/A	#N/A	#N/A
	1	62	1.58	55	22.0317	80.8556	77.9827	42.1857	46.6854	1	79.4192	44.4355	47	3	10	33	127	76	12	0	1	0	0	0	1	1	1	0	5.87	0.79	0.92	210	4870	116	2	166.58	31.6767	386.98		5.12	2.73	3.43	0.77	0	0	0.9	14.8667	13	13.9333
	0	73	1.7	79	27.3356	35.6175	46.77	74.4835	66.5693	1	41.1937	70.5264	42	23	9	36	116	85	8	0	1	1	0	0	1	0	1	0	17.77	0.37	0.38	2318.25	3276.2	859	2	116.34	55.96	359.16	1.57	4.09	1.43	2.72	0.82	0	0	0.9	#N/A	#N/A	#N/A
	1	62	1.62	52	19.8141	56.2278	63.93	69.2394	69.2631	1	60.0789	69.2512	54	12	0	26	146	88	5	0	0	0	0	0	1	0	0	0	7.69	0.16	0.39	11.5	4257	5.32	0	71	70.2659	268.4	0.71	5.45	1.13	3.13	1.86				#N/A	#N/A	#N/A
	0	46	1.77	89	28.4082	49.864	56.3758	70.1228	66.3085	1	53.1199	68.2157	71	10	5	27	129	91	1	0	0	0	1	1	0	0	1	0	7.34	0.29	0.57	52.71	15599.9	93	0.5	77	133.639	295.3		3.66	1.12	2.54	0.85	3	2.3	0.9	7.56667	10.7	9.13333
	0	71	1.75	75	24.4898	61.7634	56.0555	55.6809	60.4664	1	58.9094	58.0737	40	9	6	35	155	90	10	0	0	0	0	0	1	1	1	0	9.75	0.18	0.85	58.35	9516.5	62.8	0	89.75	70.922	379.18	1.17	4.35	0.98	2.95	0.81	1	2.7	1	16.4667	20.2	18.3333
	0	51	1.72	60	20.2812	53.6611	48.6777	35.7734	43.3933	1	51.1694	39.5834	58	9	16	23	130	88	11	0	0	0	1	0	1	1	1	0	11.73	0.15	0.45	842.78	16576	1580	3	87	75.4966	257.9	0.79	5.02	0.78	3.33	1.2	1	2	1	9.66667	7.96667	8.81667
	0	59	1.72	62	20.9573	20.0517	30.4067	10.0001	7.68244	1	25.2292	8.84129	47	33	20	32	152	92	15	0	1	0	1	0	1	1	1	0	12.75	0.23	0.26	616.57	10009.5	689	2	85.79	72.0021	255.57		4.99	1.22	3.28	1.42				#N/A	#N/A	#N/A
	0	63	1.76	74	23.8895	46.2705	41.1258	28.6132	32.8068	1	43.6981	30.71	44	10	12	36	134	84	7	0	1	0	0	0	1	0	0	0	11.04	0.66	0.81	18.66	10663.5	22.5	0	100.19	69.9525	392.02	0.88	4.55	1.99	2.91	1.15	3		0.9	#N/A	#N/A	#N/A
	0	55	1.66	57	20.6852	29.3643	42.4402	82.1733	77.6803	1	35.9023	79.9268	70	30	4	19	110	68	3	0	0	0	1	0	1	0	0	0	10.57	0.02	0.02	5.2	8030.5	4.72	0	89.65	66.4735	258.58	0.68	4.47	0.59	2.84	1.16	0	0	0.9	10.9333	7.46667	9.2
	0	59	1.71	80	27.3588	58.6776	60.7906	44.7599	45.1982	1	59.7341	44.9791	50	3	0	39	146	95	0.7	1	1	0	1	1	1	0	0	0	7.12	0.71	1.17	9.06	13657.8	14	0	90.31	88.256	372.01	0.76	10.59	16.68	1.42	2.05	3	2.3	1.1	17.3	11.0333	14.1667
	0	75	1.78	72	22.7244	45.9402	31.8296	30.9137	39.1267	1	38.8849	35.0202	32	30	20	34	120	77	13	0	1	0	0	0	1	0	0	0	6.69	0.32	2.44	5.01	6358	3.6	0	120	47.97	324.3	1.33	2.88	1.02	1.68	0.81	2		1.5	#N/A	#N/A	#N/A
	0	78	1.68	55	19.487	37.2802	40.133	28.263	23.2313	1	38.7066	25.7471	27	7	17	30	180	101	6	0	1	0	0	0	1	0	1	0	10.91	0.16	0.52	49.31	6886	38.4	0	77	54.4714	332.6	1.15	4.25	0.93	2.7	1.22	3		1	6.1	6.56667	6.33333
	1	64	1.55	55	22.8928	49.4957	59.7131	60.2359	55.3018	1	54.6044	57.7689	48	18	8	32	132	80	25	0	1	0	0	0	1	1	0	0	7.4	0.26	1.23	23.77	6174.8	16.6	0	97.41	52.781	657.92	0.94	4.14	2.12	2.51	1.07	2	3	1.1	6.1	6.56667	6.33333
	1	65	1.67	68	24.3824	47.9148	46.4759	53.1546	36.0626	1	47.1953	44.6086	44	4	32	36	145	81	12	0	1	0	0	0	1	0	0	0	7.23	0.4	1.34	6.05	5190.4	3.55	0	74.36	84.3599	377.68		6.36	2.42	4.23	1.22	1	2.9	1	38.0333	32	35.0167
	0	68	1.73	130	43.4361	48.0263	42.29	40.2959	44.9283	1	45.1582	42.6121	40	12	11	51	135	89	8	0	1	0	0	0	1	1	0	0	7.54	0.56	0.99	2.59	10714	3.14	0	139	82.8259	360.9	1.1	5.77	1.31	3.98	1.51	1	2.1	1	#N/A	#N/A	#N/A
	0	55	1.8	89	27.4691	27.5673	20.951	44.6496	45.5743	1	24.2592	45.112	55	25	2	36	112	78	6	0	0	0	0	0	1	0	0	0	5.77	0.31	1.09	1.61	10970.9	2	0	126.68	73.4524	351.18	0.99	2.36	0.99	1.32	0.89	2	1.8	1	6.46667	8.43333	7.45
	1	73	1.6	50	19.5312	35.42	21.9315	75.3527	72.8694	1	28.6757	74.111	45	37	2	24	172	96	0.02	0	1	0	0	0	1	0	0	0	7.58	0.48	0.69	7.63	6824	5.89	0	79	52.1582	299.7	0.93	6.54	1.22	1.46	1.14	1		1.4	10.4667	15.2667	12.8667
	1	48	1.58	52	20.83	47.923	64.6443	68.0659	71.3477	1	56.2837	69.7068	70	26	4	18	143	92	0.3	0	1	0	0	0	1	1	1	0	9.01	0.45	0.68	35.83	10981	44.5	0	65	90.528	532.4	0.49	5.28	1.7	3.68	0.95	1		1	38.8333	33.1	35.9667
	1	54	1.55	56	23.3091	9.71949	8.36986	71.4047	64.2922	1	9.04468	67.8484	62	20	9	26	134	75	0.03	0	0	0	0	0	1	0	0	0	13.43	0.14	0.17	10.02	7942.59	9		68.81	86.0875	332.95	0.76	5.02	1.56	3.44	1.06				8.7	18.8667	13.7833
	0	45	1.6	58	22.6562	59.9674	64.9086	71.8012	67.7326	1	62.438	69.7669	73	7	5	18	146	102	13	0	1	0	0	1	0	1	1	0	12.23	0.14	0.23	845.06	9552.63	913	2	96.41	70.2966	562.85	0.81	6.61	1.76	4.24	1.22	1		1	#N/A	#N/A	#N/A
	1	55	1.68	72	25.5102	56.228	60.0297	57.1897	64.0708	1	58.1289	60.6303	58	6	10	32	162	90	2.5	0	0	0	0	0	1	0	0	0	9.04	0.29	1	14.95	7274.2	12.3	0	71.7	104.987	316.19	0.6	6.32	1.97	4.3	1.2	0		1	9.93333	12.1	11.0167
	1	63	1.63	60	22.5827	50.0618	50.0481	46.3477	41.6901	1	50.0549	44.0189	46	0	8	33	106	75	15	0	0	0	0	0	1	0	1	0	13.79	0.48	0.87				2	202	28.1317	534.3	2.2	3.84	1.8	2.54	0.52	1		1.3	16.9333	12.0333	14.4833
	1	69	1.55	55	22.8928	45.7981	63.382	69.1237	70.4835	1	54.5901	69.8036	46	26	1	30	154	66	12	0	0	0	0	0	1	1	1	0	12.41	0.32	0.81	478.22	4363.4	236	0.5	109.42	43.8965	370.41		6.7	2.77	4.47	1.18	0	0	1.4	15.9	20.6	18.25
	1	61	1.51	55	24.1217	79.5407	56.8909	87.8366	85.159	1	68.2158	86.4978	75	28	3	22	130	75	0.5	0	0	0	0	0	1	1	1	0	12.74	0.16	0.44	58.49	9976.8	66	0	68.97	77.488	247.49		6.85	2.08	4.38	1.44	0	0	0.9	14.8333	16.8333	15.8333
	0	56	1.7	50	17.301	22.3419	17.5904	14.9182	12.1303	1	19.9661	13.5242	51	18	20	25	145	89	5	0	0	0	1	0	1	1	1	0	12.53	0.3	0.29	1153.11	11885	1550	2	107	48.2804	474.2	1.04	4.3	0.97	2.65	1.24	0	0	0.9	25.3333	22.7667	24.05
	0	69	1.58	56	22.4323	55.5383	58.5795	80.0504	82.7652	1	57.0589	81.4078	56	5	3	24	149	97	13	0	1	1	0	0	1	0	1	0	9.06	0.31	0.53	47.74	17021	91.9	0	80	61.131	351.7	0.91	5.36	5.75	3.35	0.73	1		0.9	9.7	11.7	10.7
	0	66	1.72	65	21.9713	74.5932	72.3684	30.3458	33.0074	1	73.4808	31.6766	41	4	9	33	126	80	11	0	0	0	0	0	1	1	0	0	10.9	0.5	0.9	5.27	7807	4.65	0	97	60.9928	425.1	0.79	4.06	5	2.45	0.65	0	0	0.9	18.8	17.7667	18.2833
	1	72	1.49	48	21.6206	51.2065	41.1729	61.9965	64.402	1	46.1897	63.1993	40	19	3	30	129	76	13	0	1	1	1	0	1	1	1	0	11.47	0.45	1.42	226.49	5387.2	138	0	81.35	49.3512	224.99	1.33	3.86	1.39	2.62	0.73	1	2.5	1	19.8	25.9333	22.8667
	0	67	1.75	75	24.4898	46.4943	50.9025	70.7857	76.2664	1	48.6984	73.5261	52	9	6	31	122	72	22	1	1	0	1	0	1	1	0	0	10.89	0.67	1.6				0	80	84.1781	448.7	0.94	2.49	1.99	1.5	0.77				#N/A	#N/A	#N/A
	1	60	1.53	60	25.6312	47.6936	47.6191	64.5555	61.7068	1	47.6564	63.1311	54	0	4	35	140	78	11	0	1	0	0	0	1	0	0	0	9.38	0.76	1.33	16.12	4640	8.46	0	64	92.25	667.9	0.74	6.25	1.11	4.51	0.93	1		0.9	17.1333	17.0333	17.0833
	1	69	1.56	55	22.6003	38.4769	38.7155	25.6785	22.0422	1	38.5962	23.8604	37	2	15	35	184	90	12	0	1	0	0	0	1	0	1	0	16.57	0.08	0.15	1688.87	2581	493	2	110	43.665	336.5	1.47	2.42	0.95	1.34	0.78	1	1.8	1	#N/A	#N/A	#N/A
	1	62	1.59	52	20.5688	46.0802	39.0356	51.3715	40.8276	1	42.5579	46.0995	47	15	19	30	120	80	13	0	0	0	0	0	0	0	0	0	9.1	0.1	0.21	4.31	4223	2.06	0	67	74.4609	313.5	0.83	5.63	1.15	3.57	1.41	1		1.1	16.3333	17	16.6667
	0	26	1.7	74	25.6055	54.0806	55.8252	57.1416	58.8035	1	54.9529	57.9726	89	3	3	9	134	98	4.5	0	0	0	1	0	0	0	0	0	10.22	0.78	1.52					66.28	156.552	428.87	0.61	4.15	2.93	3.1	0.66				22.4333	22.5667	22.5
	1	67	1.58	70	28.0404	39.4963	43.4383	61.5863	55.0482	1	41.4673	58.3173	44	9	11	40	163	84	10	0	1	0	0	0	1	0	1	0	6.87	0.95	2.5	140.53	3240.2	51.5	0	63.89	98.3769	326.85	0.74	3.42	1.58	2.06	1.08	3		1	6.23333	8.53333	7.38333
	0	59	1.5	53	23.5556	57.9964	56.4532	74.7153	72.408	1	57.2248	73.5617	60	3	4	29	175	95	8	0	1	0	0	0	1	0	0	0	8.98	0.32	0.67	6.87	7476	5.81	0	61	86.5638	337.4	0.7	4.92	0.95	3.07	1.26	3		1	6.86667	9.66667	8.26667
	0	66	1.62	65	24.7676	20.0998	28.5732	43.64	51.1393	1	24.3365	47.3896	43	31	13	36	187	106	6	0	1	1	1	0	1	1	1	0	8.11	0.89	0.89	197.25	3474	77.5	0.5	151	39.1808	337.4	1.49	5.95	2.89	4.05	0.98	1	3.1	1.4	7.93333	10	8.96667
	0	64	1.72	70	23.6614	41.3952	28.7411	37.9986	31.7036	1	35.0682	34.8511	44	29	15	36	130	83	8.5	0	0	0	0	0	1	0	1	0	15.31	0.73	0.64	457.75	7475.2	387	0.5	217.32	30.1104	324.43	2	3.36	4.18	2.35	0.34	0	0	0.9	11.5333	11.6	11.5667
	0	39	1.68	60	21.2585	52.1035	55.4622	54.5621	49.999	1	53.7829	52.2805	74	5	9	14	120	87	4.5	0	0	0	0	0	1	0	0	0	14.21	0.88	1.33	14.58	6186	10.2	0	91	81.9099	585		11.78	15	1.04	2.59	0	0	0.9	25.5	26.8	26.15
	1	69	1.57	54	21.9076	23.5647	40.3925	4.38044	4.50418	1	31.9786	4.44231	36	40	20	34	135	81	7.5	0	0	0	0	0	1	1	1	0	10.05	0.39	0.33	97.02	3390	37.2	0	98	48.1206	325.8	1.03	6.23	2	4.15	1.1	1		1	12.5667	15.9667	14.2667
	1	75	1.61	65	25.0762	57.511	50.1917	63.593	66.8072	1	53.8514	65.2001	38	13	4	34	132	92	10	0	1	0	0	0	1	0	0	0	8.64	0.92	1.72	0	0	0	0.5	149.73	34.7075	382.63	1.9	4.77	1.36	3.04	1.1				#N/A	#N/A	#N/A
	1	69	1.56	50	20.5457	58.9014	58.2921	61.362	58.2004	1	58.5967	59.7812	43	1	4	29	154	87	22	1	1	0	0	0	0	0	0	0	8.59	0.13	0.31	9.92	6932	7.78	0	82.42	52.9786	336.8	0.72	5.8	1.12	3.58	1.46	0	0	0.8	9.26667	10.8	10.0333
	0	62	1.73	77	25.7276	51.4739	50.1237	62.047	62.5869	1	50.7988	62.317	51	1	1	36	130	73	2	0	0	0	1	0	1	0	0	0	6.28	1.03	3.58	3.41	14286.4	5.51	0	96.69	76.4027	587.75	1.12	4.83	1.3	3.07	1.01	0	0	0.9	11.7333	19.4333	15.5833
	0	56	1.7	62	21.4533	39.8053	41.5694	53.5658	52.4099	1	40.6873	52.9878	55	4	3	28	127	86	0.05	0	0	0	0	0	1	0	0	0	9.29	0.23	0.96	6.62	8514.24	6.37	0	88.97	72	271.32	0.87	6.33	1.58	4.5	0.95	0	0	0.9	#N/A	#N/A	#N/A
	1	57	1.55	62	25.8065	52.0268	49.3954	71.7241	64.0454	1	50.7111	67.8848	59	5	11	32	128	73	6.5	0	0	0	0	0	1	0	0	0	9.65	1.47	2.31	7.06	7760	6.2	0	71	89.149	381.5	0.64	3.65	0.95	2.41	0.89	0	0	0.9	14.6	11.0333	12.8167
	0	48	1.76	88	28.4091	56.5863	51.1458	45.6358	38.3163	1	53.866	41.9761	62	10	17	32	147	105	10	0	0	0	1	0	1	0	0	0	6.99	0.31	0.9	3.48	12944.7	5.1	0	97.31	102.334	355.85	0.86	4.05	3.45	2.64	0.78	0	0	0.9	#N/A	#N/A	#N/A
	1	53	1.5	55	24.4444	41.3071	40.4358	29.7222	20.8337	1	40.8715	25.278	55	2	30	32	105	60	12	0	0	0	0	0	1	1	1	0	13.93	0.14	0.13	138.31	55517	86.3	0.5	58	101.475	314.7	0.54	4.64	1.32	3.18	0.94	0	0	0.9	22.5	15.7667	19.1333
	1	70	1.58	65	26.0375	66.8817	60.4444	54.0874	55.942	1	63.6631	55.0147	40	10	3	37	134	74	19	0	0	1	0	0	1	0	0	0	6.45	0.53	1.67		4252.4	2	0	73.38	76.2674	395.23	0.98	4.94	3.07	2.96	1.04	1	2	1.2	18.0333	22.2333	20.1333
	1	66	1.56	55	22.6003	57.4518	59.0513	63.6272	61.6117	1	58.2516	62.6195	47	3	3	31	134	79	21	0	0	1	0	0	1	0	0	0	6.23	0.12	0.89	18.6	4944	10.4	0	68	73.6191	240.1	0.73	4.74	1.1	2.93	1.37	2		0.9	21.5667	18.3333	19.95
	1	57	1.55	47	19.563	77.7748	79.5855	49.1796	60.3105	1	78.6802	54.745	54	2	18	26	132	83	7	0	0	0	0	0	1	0	1	0	10.57	0.45	1.05	268.62	2876.79	87.4	0.5	63	76.1624	190.8	0.85	3.71	1.49	2.51	0.47	1		1	13.8667	19.4667	16.6667
	1	57	1.6	54	21.0937	47.948	52.5839	63.5126	65.2864	1	50.2659	64.3995	57	9	1	26	124	67	12	0	1	1	0	0	1	1	1	0	7.05	0.55	1.22	33.64	4074	15.5	0	128	43.0692	480.4	1.38	3.69	1.58	2.17	1.08	3		1	16.5	16.9	16.7
	0	55	1.67	65	23.3067	37.1755	32.6854	65.4329	64.7052	1	34.9304	65.069	60	10	0	28	136	84	9	0	0	1	0	0	1	0	0	0	7.35	0.42	0.67	3.85	14687.2	6.39	0	86.01	79.0112	425.82	0.74	4.9	2.74	3.09	0.77	0	0	0.9	7.8	7.63333	7.71667
	0	50	1.63	46	17.3134	9.59867	9.6165	8.75623	9.22445	1	9.60758	8.99034	57	0	0	20	144	87	7.5	0	0	0	1	1	1	0	0	0	15.45	0.18	0.2					89.72	56.7566	304.05		4.69	1.31	2.83	1.23	0		0.9	17.0667	16.8	16.9333
	0	59	1.63	63	23.7118	56.0279	67.1545	76.6344	74.4961	1	61.5912	75.5652	61	16	3	28	104	87	10	0	0	0	0	0	1	0	0	0	7.04	0.31	1.26	3.19	11630.7	4.2	0	99.7	62.9558	283.63	0.88	5.06	1.95	3.33	1	0	0	0.9	12.0667	17.6667	14.8667
	0	63	1.72	60	20.2812	28.7858	37.8673	49.4481	35.7765	1	33.3266	42.6123	46	23	26	30	145	86	26	0	0	0	1	1	1	1	1	0	4.9	0.66	0.81	101.87	7160.4	82.5	0	55.15	103.039	412.84	1.29	5.73	1.74	4.47	0.67	2		1.1	#N/A	#N/A	#N/A
	0	83	1.72	79	26.7036	29.2875	28.0217	30.8351	44.4073	1	28.6546	37.6212	23	3	29	40	145	77	14	0	1	0	0	0	1	0	0	0	10.31	0.02	0.18	6.82	8691	6.7	0	83	66.7312	261.5	0.99	4.23	0.63	2.62	1.31	2		0.9	8.03333	8.06667	8.05
	0	59	1.69	60	21.0077	60.2463	56.7742	19.0157	9.66034	1	58.5102	14.338	47	5	47	32	122	88	12	0	0	0	0	0	1	0	0	0	13.06	0.91	1.08	3.41	6553	2.53	0.5	79	75.6684	254.5	0.6	3.81	0.67	2.19	1.32	1		0.9	7.46667	6.36667	6.91667
	0	73	1.75	65	21.2245	40.6855	42.6619	66.8723	69.9881	1	41.6737	68.4302	41	4	4	28	145	82	15	0	1	1	1	1	1	0	1	0	7	1.07	1.13	2105.11	4368.13	1040	2	275.44	19.4476	488.68	2.05	3.69	1.29	2.3	0.77	3		1.4	7.03333	8.23333	7.63333
	0	86	1.65	68	24.977	43.232	41.6707	20.014	37.6518	1	42.4513	28.8329	19	2	47	38	155	87	10	0	1	1	0	0	1	0	1	0	12.62	0.41	0.39	281.23	10343.5	329	1	84.94	53.1735	247.27	1.03	4.09	2.1	2.64	0.86	3		1.2	23.1	18.4667	20.7833
	0	81	1.7	59	20.4152	33.4848	29.0899	37.0992	35.8564	1	31.2874	36.4778	25	12	2	31	179	93	5.5	0	0	0	1	0	1	0	0	0	12.87	0.14	0.14	5.33	13144.2	7.93	0	89.18	48.0111	327.1	0.87	4.35	0.9	2.97	0.85	3		1	#N/A	#N/A	#N/A
	0	51	1.62	54	20.5761	48.2342	52.8613	78.5654	76.5788	1	50.5477	77.5721	72	9	2	17	136	92	6	0	1	0	1	1	1	0	0	0	11.24	0.2	0.29	12.37	7077	9.9	0	89	66.42	496	0.64	7.8	4.38	5.23	1.13	0	0	0.9	#N/A	#N/A	#N/A
	0	43	1.68	68	24.093	30.9491	27.5228	41.0834	36.0141	1	29.236	38.5488	67	9	12	22	122	80	3	0	0	1	0	0	1	0	1	0	15.51	0.2	0.21	1123.41	3644	463	2	82	98.94	581.8	0.82	10.66	12.25	4.35	0.65	3		1	#N/A	#N/A	#N/A
	1	30	1.58	47	18.8271	47.9025	47.0739	66.857	68.5055	1	47.4882	67.6813	88	2	2	1	122	80	4	0	0	0	0	0	0	0	0	0	12.08	0.36	0.25	11.72	6986.5	9.26	0	57.36	110.863	246.31	0.58	4.14	0.85	2.6	1.04				#N/A	#N/A	#N/A
	0	54	1.7	65	22.4913	25.9658	24.7887	27.1616	24.3942	1	25.3772	25.7779	54	3	11	30	121	76	10	0	0	0	1	0	1	0	1	0	10.79	0.31	0.49	46.89	9862	52.3	0	83	82.8398	390.7	0.78	7.19	1.45	5.15	1.03	3		1	#N/A	#N/A	#N/A
	0	70	1.72	80	27.0416	43.945	37.5329	61.3676	56.9962	1	40.7389	59.1819	41	13	6	38	130	75	16	0	1	0	0	0	1	0	0	0	9.23	0.14	0.41	28.5	5056.6	16.3	0.5	99.44	69.2679	426.35		4.91	1.17	3.06	1.45	2		1	8.83333	10.2333	9.53333
	1	60	1.5	60	26.6667	45.0456	54.4818	69.6784	75.7698	1	49.7637	72.7241	58	16	7	34	140	114	4.5	0	1	0	0	0	1	0	1	0	12.03	0.22	0.36	2474.26	3477	973	2	237	24.9114	271.6	2.1	6.26	2.3	4.23	0.072	1		1	10.2	11.3	10.75
	1	51	1.65	57	20.9366	46.7815	50.1733	31.292	76.6258	1	48.4774	53.9589	61	6	59	23	123	72	2	0	0	0	0	0	1	0	1	0	10.6	0.3	0.28	54.11	8267.5	50.6			#DIV/0!				2.14	3.73		0	0	0.9	#N/A	#N/A	#N/A
	0	59	1.62	54	20.5761	45.4847	45.8131	63.7846	73.4085	1	45.6489	68.5965	57	2	12	26	147	89	7	0	1	0	0	0	1	0	1	0	13.35	0.2	0.22	4189.67	2912.3	1380	2	191.43	28.1044	634.02	2.14	6.21	1.19	3.95	1.54	1	2.8	1.3	#N/A	#N/A	#N/A
	0	67	1.77	68	21.7051	77.2665	79.6184	58.6182	53.3042	1	78.4424	55.9612	44	3	10	31	166	96	7	0	1	0	0	0	1	0	0	0	7.44	0.11	1.06	9.58	6116.1	6.63	0	101.25	60.3034	434.27	0.88	4.36	1.26	3.05	0.79	2		1.4	7.6	7.76667	7.68333
	0	67	1.68	70	24.8016	19.4383	27.1271	5.75089	8.47214	1	23.2827	7.11151	38	29	25	38	107	72	7	0	1	0	0	0	1	1	1	0	11.05	0.27	0.51	21.23	6331	15.2	0	154	40.8136	343.4	1.78	4.4	1.26	2.89	0.91	2		1	10.4	9.96667	10.1833
	1	65	1.5	50	22.2222	55.0953	67.851	76.8333	75.3409	1	61.4732	76.0871	55	19	2	27	141	81	4.5	0	1	1	0	0	0	0	0	0	6.32	0.57	0.46	5.98	15535.1	10.5	0	79.99	57.6635	252.25	0.77	4.5	1.68	2.94	1.07	3	2.5	1	26.7333	28.7	27.7167
	0	58	1.64	62	23.0518	8.35826	14.1463	10.2145	11.2056	1	11.2523	10.71	48	42	9	34	150	90	0.01	0	0	0	1	1	1	0	0	0	13.08	0.17	0.38	8.28	13130	12.3	0	96	65.1388	693.4		7	2.25	5.14	1.06	0		1.1	8.13333	8.33333	8.23333
	1	68	1.55	55	22.8928	8.49655	11.6406	44.2635	42.1332	1	10.0686	43.1983	40	33	4	34	152	95	20	0	1	0	0	0	1	0	1	0	11.4	0.44	0.57	921.97	4421	461	1	67	72.6985	209.2	0.77	4.79	1.24	2.98	1.38	2		0.9	18.4	19.4667	18.9333
	0	62	1.68	68	24.093	8.97105	10.385	70.754	69.9762	1	9.67801	70.3651	54	10	1	32	146	89	16	0	0	0	1	0	1	0	0	0	9.98	0.11	0.54	4.41	4390.8	2.19	0	79.6	81.9588	279.7	0.92	4.6	0.58	3.03	1.26	1		1	13.9667	12.1667	13.0667
	1	69	1.6	71	27.7344	75.979	79.1467	22.8835	12.1658	1	77.5629	17.5247	37	3	47	42	132	72	3.5	0	1	0	0	0	1	1	1	1	7.93	4.13	4.25	50.31	9420	53.6	1	159	38.9964	636	2.6	5.05	1.33	3.3	1.17	1	1.9	1	#N/A	#N/A	#N/A
	1	61	1.6	50	19.5312	52.319	56.4717	74.0824	72.7496	1	54.3954	73.416	57	7	1	24	124	85	12	0	0	0	0	0	1	0	1	0	14.89	0.19	0.88	62.03	6941.2	48.7	0	70.95	68.4778	267.73	0.64	4.76	1.69	2.9	1.28	0	0	1	17	15.7333	16.3667
	0	63	1.64	60	22.3081	56.5236	49.7493	80.6321	75.3305	1	53.1365	77.9813	59	12	7	26	130	85	10	0	0	0	0	0	1	0	1	0	11.31	0.36	96.35	15508	169	1	1	88	64.575	205.5	0.69	4.88	1.15	3.09	1.28	0		1.1	10.4	16.0333	13.2167
	0	51	1.5	66	29.3333	30.7197	25.2373	55.3393	53.4698	1	27.9785	54.4045	61	19	3	35	136	86	0.2	0	0	0	0	0	1	0	1	0	12.15	0.34	0.86	44.92	8818	44.8	0.5	53	136.321	308	0.66	4.73	1.02	3.3	1.04	0		1.3	12.8667	18.7	15.7833
	0	57	1.71	60	20.5191	64.7909	69.2638	60.2677	56.9367	1	67.0273	58.6022	55	5	5	27	116	79	0.01	0	0	0	1	0	1	0	0	0	6.49	0.43	2.8					78.27	78.2599										10.4667	11.4333	10.95
	0	57	1.72	59	19.9432	42.0425	46.3055	56.6937	49.1525	1	44.174	52.9231	54	8	14	27	136	86	8.5	1	1	0	1	0	1	0	0	0	10.7	0.18	0.36				0	96.02	62.7297	517.77	0.77	4.93	1.93	3.19	1.21				13.7667	22.6	18.1833
	1	73	1.58	70	28.0404	39.2301	46.025	68.8034	66.4599	1	42.6276	67.6317	41	15	4	38	22	106	91	0	1	0	0	0	1	0	0	0	12.66	0.33	0.33	3.38	5956.5	2.28	0	96.21	59.9595	425.26	1.2	5.54	2.33	3.55	1.45	2		1	15.3333	16.0333	15.6833
	0	66	1.6	56	21.875	54.896	56.6137	60.5134	54.5861	1	55.7548	57.5497	45	3	9	31	152	78	5.5	1	1	0	0	0	1	0	1	0	6.86	0.97	0.95	6871.49	2354.71	1830	2	428.55	11.8939	467.98	3.21	6.48	1.38	3.72	2.07				#N/A	#N/A	#N/A
	1	66	1.54	51	21.5045	16.472	15.9243	24.4987	20.9841	1	16.1981	22.7414	40	0	12	33	114	85	7	0	0	0	0	0	1	1	1	0	12.32	0.12	0.13	149.73	12814	217	0.5	115	40.3654	343.5	1	9.3	2.23	6.68	1.38	3		1.4	5.1	6.73333	5.91667
	0	75	1.65	56	20.5693	54.4011	60.9352	62.0084	59.0205	1	57.6682	60.5145	36	11	4	29	120	72	5.5	0	0	0	0	0	1	1	0	0	9.1	0.27	1.2	3.02	5860	2	0	79	56.6734	427.6	0.93	3.62	0.77	2.22	1	0		0.9	22.3333	23.0667	22.7
	1	57	1.6	53	20.7031	49.3818	53.3075	76.8958	75.2874	1	51.3447	76.0916	64	7	2	22	117	81	0.01	0	0	0	0	0	1	0	0	0	16.05	0.24	0.31	5.11	4496.5	2.6	0	72.38	74.755	311.74	0.64	5.6	0.98	3.8	1.27	0		0.9	23.4333	22.1667	22.8
	1	47	1.55	59	24.5578	64.0986	58.2168	60.9862	51.9753	1	61.1577	56.4808	66	9	14	24	132	90	1	0	0	0	0	0	1	0	0	0	12.68	0.32	0.2	18.53	8970.48	18.8	0	56.29	119.897	268.66	0.62	7.42	2.14	4.89	1.18				34.2667	41.1667	37.7167
	0	59	1.59	54	21.3599	34.6221	35.5867	78.8105	76.8233	1	35.1044	77.8169	63	2	2	24	150	86	12	0	1	0	0	0	1	1	0	0	9.94	0.14	0.43	18.62	6268.1	13.2	0	59.91	89.8017							0		1.2	#N/A	#N/A	#N/A
	0	55	1.7	64	22.1453	57.5566	56.0892	53.0252	51.4122	1	56.8229	52.2187	56	3	3	28	141	88	11	0	0	0	1	1	1	0	0	0	8.38	0.15	0.87	4.3	12220.7	5.95	0	125.81	53.185	337.11	1	4.49	0.88	3.09	1.03	1	2.3	1	10.2667	11.7	10.9833
	1	61	1.65	60	22.0386	40.618	48.0286	64.43	64.7273	1	44.3233	64.5787	53	14	1	30	159	93	2.5	0	1	0	0	0	1	1	0	0	7.5	0.41	1.11	9.17	3809.6	3.95	0	73.18	79.6693	165.34	0.71	3.99	0.74	2.34	1.26	0		0.9	17.6667	16.8667	17.2667
	0	57	1.57	58	23.5304	21.0808	49.4962	79.629	78.8618	1	35.2885	79.2454	67	57	1	25	175	113	12	0	0	0	0	0	1	0	0	0	15.3	0.22					1	86.18	68.7076	397.76	1.11	5.69	0.53	3.44	1.67	0		1.2	36.9333	41.2333	39.0833
	0	44	1.78	80	25.2493	45.6786	53.2829	75.1921	70.182	1	49.4807	72.687	76	13	6	19	119	81	0.8	0	0	0	0	0	1	0	0	0	8.04	0.38	1	4.46	6180	3.12	0.5	94	100.494	402.5	0.84	5.19	1.25	3.63	1.04	0	0	0.9	8.33333	9.93333	9.13333
	0	32	1.76	75	24.2123	55.5508	68.1261	53.3274	61.4276	1	61.8384	57.3775	83	17	13	12	149	87	5	0	0	0	1	1	0	0	1	0	10.61	0.6	0.88	211.19	8331.45	199	0.5	77.65	128.307	395.89		5.74	6.38	3.65	0.85	0		1.5	9.9	9.4	9.65
	0	74	1.63	70	26.3465	56.6645	62.5459	68.2234	62.5154	1	59.6052	65.3694	39	9	7	36	184	89	22	1	1	0	0	0	1	1	1	0	7.55	0.49	1.19	187.04	4637.4	98.1	0	135.67	41.8855	523.11	1.26	3.78	2.25	2.29	0.9	3	2	1	17.3667	18.1667	17.7667
	1	63	1.6	65	25.3906	36.2042	46.3086	79.9257	78.474	1	41.2564	79.1999	60	21	2	30	140	83	12	0	0	0	0	0	1	0	0	0	10.38	0.12	0.26	8.68	8622.1	8.46	0	85.21	72.2468	295.24	1.05	8.07	2.51	5.32	1.4	2		1.4	22.0667	21.7333	21.9
	0	55	1.78	72	22.7244	29.5414	29.0042	67.3008	61.1987	1	29.2728	64.2497	59	3	8	27	129	82	0.15	0	0	0	1	0	1	0	0	0	13.63	0.1	0.15	13.9	7968.21	11.8	0	86.56	86.964	337.5		5.81	1.51	4.07	1.03	0		0.9	7.26667	10.4333	8.85
	1	62	1.55	46	19.1467	69.4549	63.6835	56.541	61.1807	1	66.5692	58.8609	50	7	6	27	173	87	15	0	1	0	0	0	1	0	1	0	8.12	0.25	0.56	240.59	3366.3	91.3	0	67.53	65.3523	319.28	0.76	4.81	1.36	3.12	1	1		1	11.9667	22.2333	17.1
	1	71	1.6	68	26.5625	50.1977	50.7096	72.1418	72.3423	1	50.4536	72.242	46	1	0	34	132	78	13	0	1	0	0	0	1	1	0	0	6.97	0.79	2.15	24.66	5522	15.4	0	78	73.9892	398.5	0.87	3.01	2.09	1.86	0.86	2		1	15.4667	20.8667	18.1667
	0	35	1.72	94	31.7739	56.9927	55.6643	47.739	44.1404	1	56.3285	45.9397	77	1	8	26	120	70	1	0	0	0	0	0	1	0	1	0	8.98	0.65	1.22	1501.06	26388.6	4480	2	85.63	141.774	361.33	0.84	5.16	4.79	3.34	0.76				9.46667	11.5667	10.5167
	0	59	1.6	50	19.5312	58.225	56.7081	60.0191	57.6942	1	57.4666	58.8567	53	1	3	27	130	66	12	0	0	0	0	0	1	0	0	0	6.85	0.1	0.77	9.38	1885	2	0	79	63.057	372	0.81	4.61	0.39	2.55	1.67	3		1	13.4333	18.6333	16.0333
	1	61	1.62	56	21.3382	62.8395	54.7999	65.3991	66.23	1	58.8197	65.8145	53	12	1	29	145	86	15	0	1	0	1	0	1	0	0	0	10.77	0.31	0.79	25.27	5844	16.7	0	73	74.5414	299	0.95	4.87	2.33	3.31	0.61	0		0.9	#N/A	#N/A	#N/A
	1	62	1.56	49	20.1348	54.8891	53.2147	66.7801	66.0795	1	54.0519	66.4298	53	3	1	27	160	93	12	0	1	0	0	0	1	0	1	0	9.23	0.42	0.73	30.15	4310.84	14.7	0	80.77	58.203	286.33	0.93	6.36	0.98	3.73	1.94	1		1	28.4667	30.0333	29.25
	0	60	1.7	55	19.0311	52.3016	58.2549	76.3586	76.9728	1	55.2782	76.6657	61	10	1	22	119	69	0.01	0	0	0	1	0	1	0	0	0	13.11	0.18	0.49	4.01	9253	4.2	0	94	57.5745	328.1		5.14	1.1	3.12	1.19	1		1	10.0667	24.5	17.2833
	0	51	1.62	54	20.5761	39.6817	52.6546	44.27	44.0567	1	46.1681	44.1633	59	24	0	23	111	75	1.5	0	0	0	1	0	1	0	0	0	11.28	0.16	0.4	8.53	13998.5	13.5	0	102.53	57.6551	247.99	0.76	6.77	2.61	4.59	1.08	2	1.3	1	#N/A	#N/A	#N/A
	1	63	1.58	60	24.0346	37.5764	39.3128	50.33	45.7425	1	38.4446	48.0362	47	2	8	35	134	80	13	0	1	0	1	0	1	1	1	0	10.01	2	3.02	2256.14	8073.08	2060	2	207.77	27.3504	621.26	2.45	8.32	4.37	5.43	1.53				0	0	0
	0	56	1.68	50	17.7154	7.52111	6.1565	16.797	18.3689	1	6.8388	17.5829	51	25	5	25	197	116	18	0	1	0	0	0	1	0	1	0	9.05	0.33	0.34	6335.82	3391.1	2430	2	129.46	39.9042	320.94	1.31	5.31	0.94	3.19	1.54	0		0.9	#N/A	#N/A	#N/A
	0	47	1.6	45	17.5781	21.8494	27.8673	11.0666	10.9127	1	24.8584	10.9897	60	21	0	18	104	48	10	0	0	0	0	0	1	0	1	0	8.88	0.02	0.016	35.72	6064	24.6	0.5	97	53.0675	317.7	0.72	4.31	0.6	2.5	1.59	0		0.9	#N/A	#N/A	#N/A
	1	56	1.51	60	26.3146	44.9302	48.7691	79.783	81.0124	1	46.8497	80.3977	69	8	1	27	107	56	1	0	0	0	0	0	0	0	0	0	11.76	0.27	0.83	8.42	4736	4.51	0	67	92.5254	307.9		6.83	2.8	4.46	1.08	0		0.9	#N/A	#N/A	#N/A
	0	67	1.72	53	17.9151	12.9445	8.16417	13.3158	13.5608	1	10.5543	13.4383	39	38	7	29	109	76	17	0	0	0	1	0	1	0	1	0	8.99	0.17					0	82.67	57.5647	240.55	0.98	3.07	1.37	1.93	0.82				#N/A	#N/A	#N/A
	0	23	1.76	84	27.1178	53.7507	62.6629	57.2445	59.1317	1	58.2068	58.1881	93	14	3	8	117	76	0.01	0	0	0	1	0	1	0	0	0	9.88	0.65	3.94	7.62	19495.8	16.8	0.5	91.36	132.317	502.31	0.92	6.25	3.33	4.08	1.07	0		0.9	17.2333	19.1	18.1667
	1	61	1.55	53	22.0604	46.0121	43.6979	30.945	37.8613	1	44.855	34.4031	47	4	18	33	123	90	5.5	0	0	1	0	0	1	0	0	0	15.75	0.27	0.76	28.03	3722.56	11.8	0	54.81	93.9611	298.8	0.61	5.12	1.31	3.32	1.13	1		1	9.43333	9.3	9.36667
	0	62	1.65	62	22.7732	27.408	30.7433	45.7848	52.7937	1	29.0756	49.2893	48	12	13	33	140	90	22	0	0	0	1	1	1	0	0	0	8.29	0.1	0.59	2.75	4829	1.5	0	81	73.4356	420	0.68	6.02	0.68	4.34	1.24	2		1	23.5667	33.8	28.6833
	0	58	1.62	62	23.6244	19.9989	19.3346	26.7594	23.8413	1	19.6667	25.3004	49	5	11	34	149	103	15	0	0	0	1	0	1	1	1	0	6.75	1.09	1.06	1794.45	2621.3	532	1	416.7	15.0068	640.62	2.85	4.52	1.46	2.84	0.98	2		0.9	16.4667	31.2	23.8333
	0	74	1.66	65	23.5883	35.6388	39.0552	51.4339	44.4054	1	37.347	47.9196	34	7	13	34	126	83	8	0	0	1	1	0	1	1	1	0	11.23	1.18	1.31	247.13	6082.2	170	0	149.42	35.3145	458.1	1.92	3.89	1.99	2.62	0.68	0		1.3	#N/A	#N/A	#N/A
	1	70	1.6	50	19.5312	44.1611	46.2856	41.4366	38.2946	1	45.2234	39.8656	38	4	7	30	196	106	15	0	1	0	1	0	1	1	1	0	12.58	0.37	0.54	4374.5	2465.86	1220	2	113.82	37.8229	325.94	1.31	7.73	2.25	5.15	1.13	1		1.4	#N/A	#N/A	#N/A
	1	68	1.55	53	22.0604	36.766	43.543	67.5004	68.2914	1	40.1545	67.8959	47	15	0	29	147	98	17	0	0	0	0	0	1	1	1	0	8.5	0.71	0.96	56.75	4689.8	30.1	0	86.6	54.1995	264.8	1.23	7.08	4.58	4.54	1.16	0		1.1	30.8	29.5	30.15
	0	63	1.75	52	16.9796	31.2172	40.8827	48.9854	48.2647	1	36.0499	48.625	47	24	2	25	122	81	0.2	0	0	0	0	0	1	1	0	0	8.8	0.15	0.19	11.94	9334	12.6	0	83.34	59.0943	367.95	0.77	3.85	0.65	2.4	1.03	1		1	#N/A	#N/A	#N/A
	0	80	1.45	42	19.9762	42.4816	47.856	70.7927	59.5335	1	45.1688	65.1631	32	12	15	27	188	125	8.5	0	1	0	0	0	1	0	1	0	7.69	0.77	1.61				2	155.86	19.8871	290.95	1.91	7.28	9.79	3.71	0.8	1		1	#N/A	#N/A	#N/A
	0	68	1.62	55	20.9572	61.912	63.9008	54.0557	63.1017	1	62.9064	58.5787	43	3	14	30	191	100	22	0	1	0	1	1	1	1	1	0	13.44	0.27	0.47				3	111.07	43.8534	327.73	1.14	10.73	1.63	7.37	1.66	1		1	0	0	0
	0	57	1.62	74	28.1969	40.2564	43.1956	57.483	60.1588	1	41.726	58.8209	56	6	5	37	163	100	4	0	1	0	0	0	1	0	0	0	6.77	0.88	4.18	23.59	15443.2	41.2	0	85.78	88.0702	266.3	0.91	4.62	1.16	3.08	0.88	0		0.9	#N/A	#N/A	#N/A
	0	42	1.75	56	18.2857	57.2148	56.1843	22.9959	19.3114	1	56.6995	21.1537	67	1	17	14	115	77	5.5	0	0	0	1	0	1	1	0	0	12.79	0.09	0.36				0	70.85	95.2751	268.03	0.79	3.66	0.67	2.38	0.87	1		1	17.6	16.7667	17.1833
	1	67	1.54	58	24.4561	59.6394	50.8461	57.0389	54.8646	1	55.2428	55.9517	44	15	3	35	153	91	5.5	0	0	0	0	0	1	0	0	0	6.53	0.7	1.3	3.44	2573	1	0	71	73.3496	515.8	0.87	5.73	2.6	3.65	1.05	2		1	#N/A	#N/A	#N/A
	0	64	1.61	54	20.8325	40.9632	31.3695	10.4356	11.4617	1	36.1663	10.9487	42	24	9	33	179	99	0.01	0	1	0	0	0	1	1	1	0	11.5	0.45	0.48				2	88	57.3627	457.1	1.05	3.86	0.71	2.22	1.34	0		0.9	26.6	27.6667	27.1333
	1	68	1.6	50	19.5312	46.4774	46.9793	10.5692	10.9316	1	46.7283	10.7504	37	2	0	31	126	76	12	0	0	0	0	0	1	1	1	1	7.89	0.36	0.58	203.06	3675	84.4	0	76	58.2632	395.6	0.96	6.76	3.42	4.35	1.24	2		1	6.2	5.83333	6.01667
	1	61	1.62	60	22.8624	52.706	65.0823	74.3162	71.285	1	58.8942	72.8006	57	18	4	29	145	88	13	0	0	0	0	0	1	1	1	0	11.71	0.47	0.32	25.81	3699.3	10.8	0	79.49	73.3451	352.43		5.88	1.7	4.06	1.11	0		0.9	8.33333	13.3667	10.85
	0	57	1.68	71	25.1559	33.1147	47.8756	26.4572	20.7368	1	40.4951	23.597	50	31	19	36	141	93	3	0	0	0	0	0	1	0	0	0	8.18	0.27	0.79	6.29	13419	9.55	0	84	86.2904	357.5	0.67	5.3	0.86	3.52	1.01	0		0.9	8.46667	12.8667	10.6667
	0	60	1.62	58	22.1003	36.4089	34.3103	52.6679	54.929	1	35.3596	53.7984	51	5	3	32	175	94	3.5	0	1	0	0	0	0	0	0	0	8.14	0.38	1.28	8.66	4534.6	4.44	0	86.97	65.6226	420.48	0.97	5.4	0.96	3.54	1.21	0		0.9	11.8	7.13333	9.46667
	0	38	1.7	72	24.9135	63.8332	65.5397	70.2708	49.8747	1	64.6864	60.0727	77	3	28	17	94	56	0.15	0	0	0	1	0	1	0	0	0	9.74	1.39	2.05	27.24	7368.37	22.7	0	66.57	135.694	367.9	0.9	5.8	2.57	3.79	1.03				7.2	11.6667	9.43333
	0	46	1.73	80	26.7299	16.8528	28.2274	9.92143	8.89505	1	22.5401	9.40824	61	39	10	30	147	80	0.01	0	0	0	0	0	1	0	0	0	10.26	0.42	0.91	12.98	15328	22.5	0	97	95.3567	411.1						0		0.9	23.9667	38.2333	31.1
	1	61	1.6	48	18.75	58.3375	63.371	81.2296	80.2007	1	60.8542	80.7152	64	7	1	20	136	84	9	0	0	0	0	0	1	0	0	0	10.06	0.2	0.3	21.59	6348.3	15.5	0	71.92	64.8521	308.03	0.67	6.79	1.93	4.25	1.03	0		0.9	#N/A	#N/A	#N/A
	1	45	1.57	66	26.7759	68.7862	66.6977	59.8932	58.9139	1	67.7419	59.4035	69	2	1	25	126	75	11	0	0	0	0	0	0	0	0	0	8.52	0.08	1	28.79	7156	23.3	0	67	115.106	268.6	0.67	3.03	0.49	1.43	1.42	0		0.9	17.2667	18.3333	17.8
	0	68	1.65	65	23.8751	48.3965	58.5698	71.838	70.9651	1	53.4832	71.4015	48	18	1	31	121	71	6	0	0	0	0	0	1	0	0	0	14.9	0.39	0.68	5.02	5793	3.29	0	98	58.7388	271		6.82	1.64	1.33	4.49				42.6667	24.0667	33.3667
	0	77	1.55	48	19.9792	42.1216	47.9322	70.1109	67.7877	1	45.0269	68.9493	37	12	2	26	127	86	0.6	0	1	0	1	0	1	1	1	0	13.29	0.05	0.11	812.23	4201.9	386	0.5	72.86	51.0502	191.05	0.84	4.82	0.78	3.06	1.42				#N/A	#N/A	#N/A
	0	52	1.7	80	27.6817	69.4588	65.2257	58.5266	60.709	1	67.3423	59.6178	61	5	3	32	114	81	7.5	0	1	0	0	0	0	0	0	0	8.02	0.44	1.21	4.08	23397.9	10.8	0	136.66	63.3631	348.72	0.98	5.7	2.87	3.52	1.21	0		1.5	8.53333	12.8667	10.7
	0	49	1.8	75	23.1481	35.8901	36.3674	46.2355	45.8906	1	36.1288	46.0631	62	0	0	25	108	82	5.5	0	0	0	0	0	1	0	0	0	8.41	0.29	0.26	9.76	15310.8	16.9	0	76.6	109.592	214.05						0		0.9	4.9	7.53333	6.21667
	0	66	1.7	65	22.4913	73.2091	73.204	24.9413	25.9691	1	73.2065	25.4552	41	0	3	34	122	70	9	1	0	0	0	0	1	1	1	0	10.51	0.17	0.94	645.26	6221	454	1	111	53.3	334.4	1.09	5.45	1.1	3.77	0.85	3		1.1	#N/A	#N/A	#N/A
	0	57	1.63	63	23.7118	43.8956	45.3221	67.3709	66.3071	1	44.6089	66.839	58	2	1	30	171	89	8.5	0	1	0	0	0	1	0	0	0	8.75	0.16	0.61	16.64	6960.4	13.1	0	86.72	74.1659	489.37	1.07	4.25	0.83	2.83	1.07	0		1.2	#N/A	#N/A	#N/A
	1	41	1.55	71	29.5525	56.9521	65.9413	63.1716	72.338	1	61.4467	67.7548	76	13	12	24	160	100	7.5	0	0	0	0	0	0	1	0	0	10.88	0.26	0.56	7.77	3233.3	2.84	0	60.42	143.093	396.47	0.45	4.13	2.57	2.6	0.85	0		0.9	28.1667	12.3	20.2333
	0	48	1.8	88	27.1605	59.9459	62.9755	76.731	76.1075	1	61.4607	76.4193	74	4	1	24	128	82	10	0	1	0	0	0	1	0	0	0	11.2	0.32	0.47	29.25	8011	26.5	0	139	71.6409	357.6	1.05	4.28	1.14	2.39	0.93	0		0.9	11.3667	16.3	13.8333
	0	65	1.66	52	18.8707	53.6526	61.0059	43.321	40.4635	1	57.3293	41.8922	43	11	6	28	135	80	12	0	0	0	1	0	1	0	0	0	7.61	0.04	0.3	16.5	6482	12.1	0	91	52.7143	384.9	1.02	4.78	1	3.11	1.06				#N/A	#N/A	#N/A
	0	67	1.7	67	23.1834	12.0477	15.1669	29.7713	33.5801	1	13.6073	31.6757	40	20	11	35	132	82	0.2	0	0	0	1	1	1	0	0	0	6.36	0.42	0.76	3.99	5251.7	2.37	0	107.78	55.8168	429.1	0.78	3.72	1.16	2.55	0.79	3	2.1	1	6.2	11.2333	8.71667
	0	72	1.68	93	32.9507	44.7394	43.801	50.722	48.2615	1	44.2702	49.4918	37	2	5	47	131	96	0.1	0	1	0	0	0	1	0	0	0	7.53	0.96	2.06	19.8	6921.8	15.5	0	88.18	88.2118	533.91		6.96	1.72	4.73	0.98	1		1.2	#N/A	#N/A	#N/A
	1	76	1.59	50	19.7777	57.5354	54.0268	68.4938	66.9644	1	55.7811	67.7291	38	6	1	26	202	112	6.5	0	1	1	0	0	1	0	1	0	8.8	0.63	1.21	47.84	3012.7	16.3	0	79.39	49.578	275.5	0.78	6.83	3.43	4.58	1.12	3		1.1	#N/A	#N/A	#N/A
	1	65	1.55	60	24.974	48.1425	60.1281	66.1377	63.7764	1	54.1353	64.957	49	20	3	34	132	88	8	0	1	0	0	0	0	0	1	0	10.61	0.27	1.23	40.56	10463.6	48	0	70.95	78.0127	553.17	0.92	4.1	0.98	2.68	0.95	1	3		9.33333	12.1	10.7167
	1	55	1.55	52	21.6441	61.4084	68.322	40.4706	45.64	1	64.8652	43.0553	55	10	13	28	128	72	6.5	0	0	0	0	0	1	1	1	0	10.13	0.41	0.59	135.34	4475	68.5	0	70	77.6657	303.8	0.66	6.13	3.85	3.82	1.13	0		1.2	6.9	10.8333	8.86667
	1	69	1.56	50	20.5457	51.9991	52.1336	60.4004	61.1624	1	52.0663	60.7814	43	0	1	29	162	103	0.1	0	1	1	0	0	1	0	0	0	10.61	0.27	0.75	10.94	6173.7	7.64	0	67.89	64.3173	336.84		5.66	2.13	3.6	1.23	1	2.6	1	9.86667	11.3667	10.6167
	1	68	1.6	62	24.2187	44.4454	42.9595	34.2651	34.3217	1	43.7025	34.2934	39	2	0	36	132	74	12	0	0	1	0	0	1	0	0	0	8.65	0.41	0.45	14.41	3773.56	6.15	0	72.83	75.3909	243.28	0.85	3.39	2.14	2.03	0.89	2		0.9	#N/A	#N/A	#N/A
	1	65	1.56	60	24.6548	57.4197	58.1539	67.2011	66.2559	1	57.7868	66.7285	49	1	1	33	127	86	0.5	0	0	0	0	0	0	0	1	0	14.65	0.16	0.24	222.39	16499.5	415	0	76.85	72.0234	268.21		5.23	1.2	2.9	1.66	0		1.2	7.23333	7.96667	7.6
	0	45	1.7	65	22.4913	37.8459	41.5501	52.634	50.722	1	39.698	51.678	67	9	3	20	138	84	10	0	1	0	0	0	1	0	0	0	7.35	0.32	1.31	2.81	7577	2.41	0	106	71.6533	313.8	0.85	4.01	0.88	2.46	0.94	0		1.3	15.2	15.7667	15.4833
	0	65	1.66	73	26.4915	57.3882	55.6471	63.5379	63.4388	1	56.5176	63.4883	48	1	1	36	127	73	12	0	1	0	0	0	1	0	1	0	8.91	0.44	1.17	93.5	5711.7	60.4	0	99.34	67.7899	623.57	1.16	4.02	2.14	2.5	0.98	3	2.9	1	13.5333	19.6	16.5667
	0	71	1.6	65	25.3906	33.5725	34.352	34.1833	36.1017	1	33.9622	35.1425	36	0	5	38	138	71	22	0	1	0	0	0	1	1	0	0	8.43	0.31	0.96	18.33	10610.6	22	0	120.17	45.9062	345.89	1.21	5.69	2.45	3.89	1.04	3		1	41.9	28.6667	35.2833
	0	57	1.7	62	21.4533	57.7853	60.6152	63.3962	63.6923	1	59.2003	63.5443	57	4	1	27	152	92	2	0	1	1	1	0	1	0	0	0	10.94	0.6	0.98	11.16	31691.8	40	0.5	96.21	65.7892	249.16		5.77	1.08	3.86	1.14	0		1.1	7.03333	8.4	7.71667
	0	45	1.8	82	25.3086	21.6424	21.4944	25.3627	28.9302	1	21.5684	27.1464	64	4	13	26	124	81	0.01	0	0	0	0	0	1	0	0	0	7.49	0.24	0.68	2.79	20119.7	6.35	0	91.64	104.558	353.93		6.49	3.33	1.23	1.12	0		0.9	9.93333	9.63333	9.78333
	0	55	1.65	52	19.1001	55.4894	55.819	84.0684	80.4198	1	55.6542	82.2441	73	1	4	15	148	95	0.1	0	1	0	0	0	1	0	0	0	17.59	0.06	0.16	18.83	8171.8	17.4	0	87.5	62.1326	242.81	0.61	7.5	5.02	4.73	1.29	0		1.3	9.63333	13.6667	11.65
	1	81	1.58	55	22.0317	27.6076	28.8491	35.1858	33.8595	1	28.2284	34.5226	25	3	2	33	118	46	12	0	1	1	0	0	1	0	0	0	6.09	0.23	1.24	8.39	5870	5.57	0	89	44.8466	597.4	1.02	4.1	1.18	2.53	1.03	3		1	#N/A	#N/A	#N/A
	1	80	1.5	58	25.7778	36.9985	41.0054	25.2478	27.4218	1	39.0019	26.3348	25	9	7	39	163	97	5.5	1	1	1	0	0	1	1	0	0	9.77	0.31	0.86	10.2	7941.8	9.16	0	83.17	51.4657	384.65	0.84	5.43	1.46	3.8	0.93	2		1	15.3667	15.4333	15.4
	1	61	1.56	56	23.0112	49.7795	55.8599	51.5393	47.4824	1	52.8197	49.5109	49	10	9	34	129	87	1.5	0	1	0	0	0	1	0	1	0	6.98	0.33	1.05	43.04	11154.7	54.3	0	60.27	90.2857	391.42		5.83	1.43	4.04	1.25	1		2	#N/A	#N/A	#N/A
	0	66	1.74	65	21.4692	27.8	30.8214	71.3654	66.6031	1	29.3107	68.9842	49	9	5	28	115	76	0.25	0	0	0	1	0	1	0	0	0	13.77	0.05	0.08	6.89	5200	4.05	0	66.53	88.9268	153.01	0.51	2.68	0.67	1.73	0.65	0		0.9	10.1667	16.0333	13.1
	0	60	1.68	55	19.487	45.0495	45.7425	28.7081	59.7964	1	45.396	44.2522	49	2	51	29	127	86	13	0	0	0	0	0	0	0	0	0	7.2	0.24	0.83	4.84	10688	5.85	0	68	79.5882	452.2		7.2	1.84	4.96	1.05				10.5333	10.6	10.5667
	1	63	1.6	60	23.4375	66.5796	66.5687	29.4795	22.3547	1	66.5742	25.9171	44	0	24	36	169	128	9	0	1	0	0	0	1	1	1	0	12.67	1.14	1.24	1264.79	3362.5	481	0.5	137.97	41.1872	535.4	1.22	5.28	2.26	3.48	0.79	0		0.9	7.66667	13.2667	10.4667
	1	69	1.62	65	24.7676	39.2476	39.3558	57.0242	56.9096	1	39.3017	56.9669	42	0	0	35	108	82	5.5	0	1	0	0	0	1	0	0	0	11.37	0.12	0.11	13.71	12056.4	18.7	0	98.29	57.7521	439.64	1.27	5.14	1.05	3.56	0.99	2		0.9	21.0667	22.8333	21.95
	0	49	1.65	80	29.3848	60.8046	60.7242	41.178	43.2258	1	60.7644	42.2019	61	0	4	34	188	122	13	0	1	0	0	0	1	0	0	0		1.22	1.78	4.65	2853	1.5	0	130	68.88	435.8	1.35	9.93	14.16	4.37	0.86	0		0.9	#N/A	#N/A	#N/A
	0	43	1.72	52	17.5771	46.3532	46.1178	68.0153	68.0287	1	46.2355	68.022	74	0	0	9	127	79	2.5	0	0	0	1	0	1	0	1	0	14.13	0.27	0.97	172.64	10448	204	0	98.95	62.6995	270.9	17.38	5.13	1.79	3.43	0.84	0		0.9	8.6	11.8667	10.2333
	1	52	1.53	52	22.2137	56.2896	55.61	70.0981	69.6743	1	55.9498	69.8862	65	0	0	23	116	80	6	0	0	0	0	0	1	0	0	0	7.15	0.98	1.17	5.14	16481	9.58	0	61	92.2702	279.7	0.61	3.16	1.82	1.88	0.94				#N/A	#N/A	#N/A
	1	61	1.54	45	18.9745	9.67244	8.95803	10.1514	23.6275	1	9.31524	16.8894	45	10	58	30	152	92	0.01	0	0	0	0	0	1	1	0	0	13.4	0.38	0.68	7.02	7580	6.02	0	79	55.35	410.7	0.88	4.41	1.16	2.93	1.19	0		0.9	5.53333	6.2	5.86667
	0	75	1.58	65	26.0375	59.9332	50.9302	70.8095	74.6836	1	55.4317	72.7466	42	15	5	34	145	80	14	0	1	1	0	0	1	1	1	0	7.66	0.57	1.14	5069.33	1643	942	2	113	45.9889	519.6	1.45	7.15	3.59	4.49	1.39	2		1.2	29.9667	28.1333	29.05
	1	49	1.57	46	18.662	49.9595	53.2518	29.984	34.0759	1	51.6057	32.0299	60	5	11	20	158	70	0.01	0	1	0	0	0	1	0	1	0	8.47	0.27	0.39	41.3	29933	13.7	0	79	65.1744	178.9	0.69	3.79	1.27	2.55	1				#N/A	#N/A	#N/A
	1	49	1.54	55	23.1911	44.9286	43.4607	40.6803	40.0434	1	44.1946	40.3619	61	4	2	26	135	85	0.5	0	0	0	0	0	1	0	0	0	6.59	0.38			3080.48	2	0	66.3	92.8529	388.18	0.69	5.18	0.83	3.1	1.49	0		0.8	17.6333	10.7333	14.1833
	0	52	1.68	66	23.3844	43.8224	42.6585	42.0529	45.2935	1	43.2405	43.6732	58	2	6	28	155	117	1.5	0	1	0	1	1	1	0	0	0	7.44	0.66	1.52				0.5	83	86.0704	170.1	0.72	5.32	1.69	3.57	0.95	0		0.9	20.7	29.2667	24.9833
	1	62	1.54	65	27.4077	58.0435	67.24	85.0927	85.15	1	62.6417	85.1214	70	13	0	28	167	115	0.01	0	1	0	0	0	0	0	1	0	10.19	0.37	0.82	57.39	84411.6	54.6	0	70.26	88.7575	245.54	0.72	4.67	2.27	3.38	0.68	0		0.8	17.5667	28.1333	22.85
	0	51	1.72	60	20.2812	25.0449	19.7227	21.3433	21.979	1	22.3838	21.6612	57	20	4	24	181	93	5.5	0	1	0	1	0	1	1	1	0	8.18	0.28	0.24	2309.41	6968	1820	2	126	52.1286	267	1.16	5.5	1.57	3.76	0.88	3		1	22.4333	35.8	29.1167
	1	79	1.5	44	19.5556	45.922	39.7064	57.9948	45.5451	1	42.8142	51.7699	30	13	20	29	128	78	22	1	0	0	0	0	1	0	0	0	7.15	0.32	0.54	18.08	4285	8.76	0	61	54.12	276.9	0.8	5.17	1.7	3.07	1.43	0		1.2	9.56667	16.6333	13.1
	1	56	1.58	57	22.8329	31.5374	44.8279	73.5496	70.2885	1	38.1826	71.9191	62	28	5	26	100	60	15.5	0	1	0	0	0	1	1	0	0	8.75	0.52	0.56				0	112.35	52.4187	404.98	1.22	4.17	5.95	2.56	0.47	0		0.8	#N/A	#N/A	#N/A
	1	55	1.45	45	21.4031	47.2761	52.3445	64.6873	61.0953	1	49.8103	62.8913	59	9	6	26	128	74	10	0	0	0	0	0	0	0	1	0	7.94	0.46	0.63	144.71	10937	179	2	58	81.1164	210.8	0.61	3.51	3.54	1.74	1.34	0		0.8	9.46667	11	10.2333
	1	62	1.63	68	25.5937	20.425	19.8376	35.6842	32.8645	1	20.1313	34.2743	46	0	8	38	123	65	0.1	0	0	0	0	0	1	1	1	0	11.07	1.01	1.33	139.42	2359.1	37.2	0	175.26	37.2242	317.26	1.57	3.53	1.03	2.28	0.74	0		0.9	#N/A	#N/A	#N/A
	1	51	1.53	73	31.1846	48.7492	53.5366	68.2598	68.4431	1	51.1429	68.3515	66	9	0	35	153	98	2	0	0	0	0	0	1	0	0	0	7.43	0.66	3.49	7.96	11071.4	9.97	0	70.71	113.015	452.01	0.82	5.26	1.48	3.5	1.05	0		0.8	9.4	21.1	15.25
	0	65	1.7	70	24.2215	65.1263	64.9731	33.7775	34.063	1	65.0497	33.9202	42	0	0	36	111	89	4	0	1	0	1	0	1	0	1	0	9.2	0.05	0.05	101.29	4949.2	56.7	0	144.77	44.6052	493.85	1.68	4.73	0.71	3.25	1.12	0		0.9	12.6333	15.3	13.9667
	1	73	1.55	60	24.974	50.3777	52.6388	63.7061	68.0569	1	51.5082	65.8815	40	5	5	34	121	69	15	0	1	1	0	0	1	0	1	0	10.78	0.13		49.33	3674.39	20.5	0	87.61	56.4388	261.28	1.2	6.15	1.45	4	1.27				16.2333	16.4	16.3167
	0	62	1.66	62	22.4996	23.5221	31.2818	38.8341	41.7593	1	27.4019	40.2967	46	22	7	34	151	78	13	0	1	0	0	0	1	0	0	0	8.13	0.4	0.99	20.83	7981	18.8	0.5	124	47.97	562.4	1.01	5.36	1.15	3.76	1.08	0		0.8	7.23333	7.4	7.31667
	0	31	1.75	105	34.2857	67.1082	66.5221	66.9383	59.0887	1	66.8152	63.0135	85	0	11	24	157	102	1	0	1	0	0	0	0	0	1	0	11.98	0.39	3.03	73.18	18123	150	2	69	204.02	531.8	0.65	5.05	4.57	3.27	0.86				12.0667	23.1667	17.6167
	0	70	1.85	83	24.2513	37.5813	37.7202	57.3652	63.5826	1	37.6507	60.4739	42	0	10	34	105	81	20	0	0	1	0	0	1	1	0	0	8.21	0.13	0.16	3.65	4851	2	0	109	65.5624	329.5	0.86	5.89	0.86	3.86	1.6				6.26667	8.66667	7.46667
	0	78	1.67	50	17.9282	56.47	65.5129	80.0528	80.9946	1	60.9915	80.5237	45	15	1	19	118	64	0.01	0	0	0	1	0	1	0	0	0		0.06	0.28				0	87	43.8276	332.2	0.87	4.57	1.02	2.99	1.06	1		1.3	11.9333	12.8667	12.4
	0	77	1.53	48	20.5049	35.7188	31.6377	65.1305	72.4752	1	33.6782	68.8028	37	11	9	27	154	83	20	0	1	0	0	0	1	0	0	0	6.69	0.28	1.79	20.84	4141	9.76	0	68	54.6988	396.8	0.93	4.44	0.99	2.99	1.06	2		1	12.4	8.56667	10.4833
	0	71	1.65	50	18.3655	47.6138	51.7882	49.9556	45.5277	1	49.701	47.7416	38	7	8	27	138	79	4.5	0	0	0	0	0	1	1	1	0	9.82	0.24	0.26	37.19	14859.4	62.5	0	83.34	50.9179	173.15	0.67	4.41	1.04	3.13	0.69	3	2.3	1	11.5667	8.63333	10.1
	0	53	1.63	49	18.4425	15.8807	12.5784	34.7096	29.816	1	14.2295	32.2628	55	18	14	23	157	114	5.5	0	1	0	1	0	1	1	1	0	12.38	1.03	0.86	117.65	7966.4	106	0	147.62	35.5202	457.86	1.8	5.84	4.41	3.79	1.1				#N/A	#N/A	#N/A
	1	78	1.51	55	24.1217	64.4273	68.212	40.5129	41.8174	1	66.3197	41.1652	29	5	2	36	163	87	2	0	1	0	0	0	1	0	0	0	11.92	0.22	0.57	22.06	3009.5	7.51	0	77.56	54.0781	336.7	1.07	4.27	0.98	2.63	1.3	2		0.9	10.7333	11.7333	11.2333
	1	67	1.47	48	22.213	29.573	30.0169	58.7108	56.0324	1	29.7949	57.3716	44	0	5	32	132	88	12	0	1	0	0	0	1	1	0	0	13.56	0.19	0.38				0	100.5	42.8848	398.28	1.03	12.31	3.65	8.09	1.97				6.46667	7.16667	6.81667
	0	61	1.79	165	51.4965	58.9456	63.6205	65.3511	66.2981	1	61.283	65.8246	53	7	1	48	110	61	22	1	1	0	1	0	1	0	0	0	9.45			2.16	8174.6	2	0	120.92	132.592	464.58	0.67	3.19	1.71	2	0.83	0		1.2	8.8	10.0333	9.41667
	1	61	1.56	51	20.9566	49.7715	46.6054	80.9646	80.7704	1	48.1885	80.8675	64	6	0	23	121	60	14	0	0	0	0	0	1	0	0	0	10.37	0.26	0.52				0	99	50.0573	450.8	0.96	6.9	3.01	4.61	0.98				10.1667	22.5667	16.3667
	1	65	1.6	60	23.4375	60.2014	59.9523	77.175	77.7604	1	60.0769	77.4677	56	0	1	28	146	82	12	0	1	0	0	0	1	0	0	0	9.11	0.28	0.73	8.56	6354.8	6.15	0	87.34	63.373	275.6	0.91	3.69	0.93	1.93	1.43				16.6	18.4	17.5
	0	64	1.68	55	19.487	41.4014	42.6054	28.4875	32.5189	1	42.0034	30.5032	43	4	15	30	103	69	12	0	0	0	0	0	1	0	0	0	11.66	0.06	0.23	5.64	3138.1	2	0	76.12	67.5434	319.77	0.71	4.27	1.14	2.58	1.14	0		0.8	9.26667	11.9333	10.6
	1	53	1.62	50	19.052	64.6932	68.5778	35.0182	32.6731	1	66.6355	33.8457	56	5	5	24	123	66	10	0	0	0	0	0	1	1	1	0	10.24	0.1	0.11	54.01	3307	20.2	0	63	84.9286	260	0.74	3.45	1.81	2.23	0.63				26.9667	20.0333	23.5
	1	60	1.5	51	22.6667	15.111	18.6212	41.5072	50.4141	1	16.8661	45.9606	49	21	16	33	102	60	9.5	0	0	0	0	0	1	0	0	0	11.51	0.11	0.07				0	60.98	82.2958	294.81	0.8	5.55	0.89	3.31	1.53	0		1.2	21.7	28.9333	25.3167
	0	57	1.7	51	17.6471	53.8845	49.619	48.4506	43.3302	1	51.7517	45.8904	53	7	10	24	132	88	8.5	0	0	0	0	0	1	0	0	0	12.95	0.14	0.15	4.25	4555.87	2.19			#DIV/0!							0		0.8	19.4	14.6	17
	1	58	1.45	47	22.3543	15.6646	16.6559	40.9397	35.2121	1	16.1603	38.0759	51	5	14	32	172	117	1.5	0	1	0	0	0	1	1	1	0	6.46	0.39	1.41	32.74	4888.35	18.1	0	69.7	68.0118	378.3	0.76	3.94	1.14	2.61	0.88				17.1333	15.5667	16.35
	1	54	1.68	64	22.6757	55.7508	63.978	52.1919	55.9135	1	59.8644	54.0527	58	12	7	28	182	105	10	0	1	0	0	0	1	0	0	0	8.96	0.54	0.92	7.1	9929	7.97	0	62	109.192	368.6	0.46	6.2	8.81	3.01	0.85	0		0.8	10.1	12.6333	11.3667
	1	55	1.56	42	17.2584	33.3106	27.9761	40.1739	39.6122	1	30.6433	39.893	54	15	0	22	147	100	6	0	1	0	0	0	1	0	0	0	9.81	0.17	0.5	21.21	7712.5	18.5	0	81.55	53.8455	440.45	0.78	7.97	3.34	5.2	1.33	2	1.9	1	5.3	7.53333	6.41667
	0	65	1.49	42	18.9181	40.034	43.0111	27.3529	31.1746	1	41.5226	29.2637	42	6	12	29	124	84	12	0	1	0	1	1	1	0	0	0	15.16	0.26	0.36	27.24	3733.2	11.5	0	108	35.875	362.78		4.31	0.76	2.44	1.38	1	3.6	1	#N/A	#N/A	#N/A
	1	56	1.55	55	22.8928	28.7207	34.9542	60.374	53.4224	1	31.8375	56.8982	56	17	11	29	127	104	12	0	1	0	0	0	1	0	0	0	8.61	0.02	0.02	9.49	12765	13.7	0	74.28	76.5024	201.33	0.77	5.34	0.5	2.76	2.16	2		0.9	6.36667	9.33333	7.85
	0	68	1.65	65	23.8751	19.0796	17.6435	62.3827	60.659	1	18.3616	61.5208	44	5	1	33	159	98	4.5	0	1	0	1	1	1	0	0	0	9.6	0.28	0.33	8.1	16695.8	15.3	0	83.32	69.0879	273.61	0.92	4.33	1.27	3	0.69	1		0.9	#N/A	#N/A	#N/A
	0	63	1.62	59	22.4813	48.6494	69.51	81.6819	79.9802	1	59.0797	80.8311	62	30	2	25	148	87	0.001	0	0	1	1	0	1	0	0	0	10.79	0.2	0.44	9.22	6078	6.34	0	94	59.4456	285.2		6.78	2.51	4.81	0.98				31	24.4	27.7
	1	82	1.58	60	24.0346	58.7104	58.0777	51.7662	47.1888	1	58.3941	49.4775	26	1	9	35	135	90	22	0	0	1	0	0	1	1	0	0	10.53	0.35		17.65	3611.5	7.21	0	65.78	65.0715	302.29		5.93	1.93	4	0.95	3		0.9	#N/A	#N/A	#N/A
	1	41	1.6	57	22.2656	50.8174	54.9082	81.0476	80.8897	1	52.8628	80.9686	86	7	0	9	127	75	4.5	0	0	0	0	0	1	0	0	0	8.25	0.23	0.3	4.54	14285.7	7.34	0	62.38	111.268	323.68		4.54	1.47	2.79	1.39	0		0.8	#N/A	#N/A	#N/A
	1	58	1.49	45	20.2694	53.6077	61.7222	78.4515	70.3342	1	57.665	74.3929	61	12	10	23	119	75	12	0	1	1	0	0	1	0	1	0	9.3	0.56	0.52	2811.01	4781	1520	2	91	49.8758	410.6	1.31	5.65	2.48	3.68	1.08	3		0.9	9.53333	16.1667	12.85
	1	70	1.63	74	27.852	39.4341	51.6309	56.8122	57.8125	1	45.5325	57.3123	41	25	1	39	144	87	12	0	1	0	0	0	1	1	0	0	9.82	0.57	1.49	15.91	6001.6	10.8	0	123.33	51.6614	719.6		4.92	2.29	3.29	0.97	1		0.9	15	15.5	15.25
	0	66	1.66	70	25.4028	9.96532	7.75521	14.5825	10.0903	1	8.86026	12.3364	40	20	33	39	112	76	5.5	0	1	0	0	1	1	1	1	0	6.94	1.71		3506.89	5975.36	2370	2	421.79	15.1056	439.48	3.09	5.55	1.44	3.57	1.26	0		1.4	#N/A	#N/A	#N/A
	0	56	1.83	82	24.4857	34.7718	25.9266	40.1065	54.1872	1	30.3492	47.1469	54	25	25	33	137	85	12	0	1	0	1	0	1	1	1	0	7.96	0.46	0.52				2	111.61	75.9093	360.33	1.1	5.62	2.75	3.64	0.93	0		0.8	#N/A	#N/A	#N/A
	0	59	1.68	65	23.03	61.9733	62.3612	53.8935	63.558	1	62.1673	58.7257	53	0	15	32	148	95	12	0	0	0	1	0	1	0	0	0	9	0.37	1.57	6.94	5005.9	3.93	0	71.44	90.6488	324.87		4.61	1.2	3.04	0.97	3		1.1	20.7333	18.4	19.5667
	0	61	1.68	61	21.6128	20.3956	24.9461	41.6539	44.1538	1	22.6709	42.9039	48	20	4	32	138	83	13	0	0	0	1	1	1	0	0	0	10.08	0.66	1.56	6.99	8745.21	6.91	0	79.53	74.53			3.62	2.16	2.35	0.8	0		0.8	#N/A	#N/A	#N/A
	0	29	1.7	85	29.4118	54.9293	59.7833	64.4182	67.9322	1	57.3563	66.1752	89	8	5	15	122	82	2	0	0	0	1	0	0	0	0	0	13.23	0.07	0.16	6.37	3192	2.3	0.5	69	168.189	262.2	0.44	3.59	1.08	2.45	0.65	0		0.8	11.9333	10.6	11.2667
	0	58	1.74	69	22.7903	54.9704	66.9798	72.6314	69.1182	1	60.9751	70.8748	59	17	5	28	130	86	2	0	0	0	0	0	1	0	0	0	14.94	0.17	0.2	9.99	7618.73	8.61	0	79.72	87.2973	297.58	0.77	5.55	1.29	3.81	0.83	0		0.8	15.7667	19.3	17.5333
	1	71	1.55	67	27.8876	32.8112	27.9109	14.7693	11.1383	1	30.3611	12.9538	34	15	26	42	129	78	20	0	1	0	0	0	1	1	0	1	6.28	0.74	1.58				2	148	38.4209	353.9	1.8	5.53	2.04	3.47	1.35	2		0.9	9.16667	6.7	7.93333
	0	50	1.68	71	25.1559	39.7428	45.6892	66.0244	72.3345	1	42.716	69.1794	67	13	8	25	155	110	9.5	0	0	0	0	0	1	1	1	0	8.86	0.33	0.79	63.35	28752	206	2	91	86.3703	530.9	0.85	4.8	3.69	3.11	0.96	0		0.8	28.2667	22	25.1333
	1	79	1.6	95	37.1094	60.5333	60.6652	58.7042	53.6612	1	60.5993	56.1827	31	0	8	50	202	104	22	0	1	0	0	0	1	0	1	0	5.97	1	3.42	10.26	1723	2	0	150	47.519	479.2	2.02	3.73	1.34	2.47	0.71	2		0.9	12.9667	15.6667	14.3167
	0	44	1.65	70	25.7117	48.7877	50.9717	62.4822	63.0456	1	49.8797	62.7639	71	3	1	23	153	91	6	0	0	0	0	0	1	0	0	0	7.34	0.59	1.86	4.21	10267	4.89	0.5	107	77.2486	377.8	0.87	5.78	7.17	3.47	0.69				9.23333	19.0333	14.1333
	0	43	1.65	40	14.6924	29.4798	31.3803	8.72636	10.8223	1	30.43	9.77434	65	6	18	10	128	72	10	0	0	0	1	0	1	0	1	0	15.33	0.05	0.07	165.59	12334	231	0	65	73.4215	314.7	0.62	3.89	0.63	2.56	0.92				#N/A	#N/A	#N/A
	0	79	1.7	70	24.2215	25.851	28.2915	40.3374	46.1666	1	27.0713	43.252	28	7	13	36	124	77	3.5	0	0	0	1	0	1	0	1	0	12	0.98	1.36	60.81	3227.6	22.2	0	106.54	49.297	540.17	1.33	4.05	3.12	2.64	0.66	0		0.8	#N/A	#N/A	#N/A
	1	49	1.55	58	24.1415	28.0731	28.2072	50.3016	55.9994	1	28.1401	53.1505	63	0	10	26	143	77	13	0	0	0	0	0	1	0	0	0	7.69	0.23	0.69	8.41	5117.96	4.87	0	63.39	102.413	324.93		5.79	1.43	3.99	1.09	0		0.9	21.5667	17.0333	19.3
	1	66	1.58	62	24.8358	21.3801	22.4112	45.441	47.012	1	21.8957	46.2265	43	4	4	36	141	69	13	0	1	1	0	0	1	1	0	0	8.42	0.29	0.64	7.21	2635.2	2.15	0	92.12	61.2597	390.23	0.78	8.25	1.43	5.63	1.59	2		0.9	#N/A	#N/A	#N/A
	1	70	1.5	50	22.2222	37.9847	29.8581	60.1367	54.7101	1	33.9214	57.4234	41	21	8	32	139	65	17	0	0	0	0	0	1	1	1	0	9.19	0.61	0.92	30.29	5050.27	17.3	0	65.05	66.1799	296.98	0.81	5.97	1.36	3.88	1.63	0		1.1	18.7333	23.3667	21.05
	1	69	1.6	55	21.4844	49.0838	54.4603	74.7912	69.4053	1	51.7721	72.0982	48	9	8	27	135	80	6	0	1	0	0	0	1	0	0	0	6.2	0.61	0.56	5.91	11239	7.51	0	116	41.4065	465.9	1.17	3.25	0.57	1.49	1.77				48.2667	50	49.1333
	0	75	1.6	60	23.4375	56.6955	59.8197	34.278	24.6032	1	58.2576	29.4406	31	5	26	36	139	63	6	0	0	0	0	0	1	1	0	0	1.019	0.49	0.89	11.68	4646.1	6.14	0	101.23	47.3871	330.27	0.85	5.85	1.78	3.85	1.06	0	0	0.8	10.2667	8.16667	9.21667
	1	59	1.58	61	24.4352	43.1503	45.2668	81.8428	82.173	1	44.2085	82.0079	68	4	0	26	125	70	1.5	0	0	0	0	0	1	0	0	0	13.37	0.24	0.24	16.37	5334	10.8	0	62	98.0231	270	0.6	4.85	0.91	3.37	0.89	0		0.9	30.3667	37.6333	34
	1	68	1.58	58	23.2335	18.7134	15.7956	26.629	33.2929	1	17.2545	29.9609	39	15	18	35	122	90	9	0	1	0	0	0	0	0	0	0	9.17	0.19	0.48	20.86	3739	8.82	0	75	68.4864	335.7	0.68	5.56	4.12	3.64	0.87	1		0.9	#N/A	#N/A	#N/A
	0	72	1.72	76	25.6896	34.2216	40.2907	71.0887	63.1638	1	37.2561	67.1263	42	15	11	35	151	124	12	0	1	1	0	0	1	1	0	0	9.4	0.43	0.83	16.59	13482.6	25.3	0	83.14	76.4571	448.4	0.66	4.86	1.31	3.32	0.87	3		0.9	#N/A	#N/A	#N/A
	1	72	1.55	45	18.7305	11.7488	12.634	14.6152	9.6701	1	12.1914	12.1427	33	7	33	30	154	98	7	0	1	1	0	0	1	1	1	0	8.84	0.16	0.19	2579.52	2961.5	864	2	80.8	46.5817	334.98	1.14	4.61	1.45	3.15	1	3		0.9	6.9	7	6.95
	0	30	1.66	75	27.2173	59.632	51.9706	71.6324	73.2886	1	55.8013	72.4605	91	13	1	11	127	86	0.01	0	0	0	1	0	1	0	0	0	11.61	0.91	0.73	28.13	8888.81	28.3	0	98.03	103.514	98.03		4.28	3.82	2.91	0.72				15.1	20	17.55
	1	54	1.6	83	32.4219	14.1763	11.4517	12.3806	11.9729	1	12.814	12.1768	53	21	0	44	178	96	0.5	0	1	0	1	0	1	1	1	0	10.63	0.51	0.95	400.6	5032.2	228	0.5		#DIV/0!	447		5.8	2.99	3.86		0		1.2	8.93333	8.4	8.66667
	0	89	1.6	60	23.4375	28.8221	33.4671	29.5105	29.2973	1	31.1446	29.4039	16	12	3	36	170	89	21	0	1	0	0	0	1	0	1	0	9.6	0.69	0.8	57.32	10242.7	66.4	0	145.67	25.8379	362.25	1.65	5.76	1.07	4.07	0.92	3	3.9	0.9	#N/A	#N/A	#N/A
	1	65	1.59	50	19.7777	31.4764	25.8261	35.7576	30.6282	1	28.6512	33.1929	42	16	13	30	172	92	5.5	0	1	0	0	0	0	0	1	0	14.1	0.36	0.95	316.58	2326.48	83.3	0.5	733.33	6.2898	229.45	1.09	4.34	0.87	2.49	1.36	3	1.6	1	#N/A	#N/A	#N/A
	0	66	1.69	69	24.1588	53.8941	59.4584	64.6031	60.9462	1	56.6762	62.7747	47	8	6	33	147	94	20	0	1	0	1	0	1	0	1	0	9.58	0.67	0.54	1318.28	6485.7	967	2	192.14	32.6865	396.79	1.65	4.97	2.24	3.49	0.76	1		1.4	4.9	6.5	5.7
	1	63	1.6	65	25.3906	57.9088	57.6766	84.179	78.7772	1	57.7927	81.4781	63	0	5	28	144	80	5	1	1	0	0	0	1	0	1	0	6.85	0.89	4.22	119.13	8164	110	0.5	72	85.5021	440.8	0.68	4.08	1.65	2.42	0.9	2		0.9	5.5	5.63333	5.56667
	0	47	1.68	55	19.487	46.8875	45.1925	73.5189	72.5542	1	46.04	73.0365	73	4	1	14	128	71	12	0	0	0	0	0	1	0	0	0	7.62						0	81.04	77.6339	420.71	0.95	3.94	1.4	2.73	0.68	1		0.9	#N/A	#N/A	#N/A
	0	62	1.73	73	24.3911	46.4758	63.3641	64.6845	62.2318	1	54.92	63.4581	51	26	4	34	130	77	5	0	0	1	0	0	1	0	0	0	7.97	0.6	2.23	3.63	8422.26	3.46	0	87.04	80.4644	488.88	0.98	4.3	1.62	2.96	0.77	3		0.9	24.8	19.8333	22.3167
	0	68	1.67	73	26.1752	23.9434	28.3556	35.4102	38.1802	1	26.1495	36.7952	39	14	7	39	128	86	4	0	0	1	0	0	1	0	0	0	10.16	0.45	0.77	29.6	12873	43.1	0	95	68.0514	367.5	0.95	4	1.18	2.63	0.89	0		1.3	8.46667	10.0333	9.25
	0	46	1.72	73	24.6755	54.3067	65.3052	77.6514	81.0129	1	59.806	79.3321	79	16	3	17	128	79	4	0	0	0	1	1	1	1	0	0	6.87	0.91	1.09	5	12230	6.92	0	84	100.479	340.8	0.81	3.7	3.34	2.18	0.75	1		0.9	16.6667	14.3667	15.5167
	1	67	1.55	60	24.974	59.6856	63.0189	89.0854	88.3686	1	61.3522	88.727	75	4	1	19	146	91	6	0	1	0	0	0	0	0	1	0	12.47	0.19	0.3	39.06	4890	21.6	0	78	69.0692	517	0.97	4.88	1.42	2.86	1.28	0		0.8	7.63333	10.2333	8.93333
	1	70	1.56	57	23.4221	23.005	30.3711	62.2078	60.159	1	26.6881	61.1834	42	23	3	33	144	71	7	0	1	1	0	0	1	1	1	1	7.78	1.39		38.55	6995.3	30.5		223.78	21.9309	544.09	2.54	3.13	1.42	1.9	0.77				#N/A	#N/A	#N/A
	1	57	1.58	63	25.2363	60.254	56.8505	64.5348	70.6897	1	58.5523	67.6123	59	5	8	31	153	96	15.5	0	1	0	0	0	1	1	1	0	10.65	1.34	1.45	1467.01	4616.7	766	2	138.31	46.5018	511.12	1.73	7.85	6.08	4.7	1.25	0		1.2	12.5333	15.8333	14.1833
	1	59	1.55	67	27.8876	51.2636	51.1057	51.1529	55.4764	1	51.1846	53.3147	52	0	7	39	196	111	4.5	0	1	0	0	0	1	0	0	0	7.06	0.91	2.52	7.08	6879	5.51	0	79.18	84.3042	505.83	0.89	4.37	1.82	2.64	1.4	0		0.8	7.3	8.33333	7.81667
	1	53	1.6	49	19.1406	68.0896	71.2984	25.7682	19.927	1	69.694	22.8476	55	4	23	24	140	85	15	0	0	0	0	0	1	1	1	0	12.67	0.09	0.19	1197.94	2420.9	328	0.5	67.66	77.4976			6.53	1.26	3.79	1.96	3		1.3	6.26667	7.23333	6.75
	1	74	1.6	57	22.2656	57.8238	58.9394	75.421	73.248	1	58.3816	74.3345	44	1	2	28	162	90	13	1	1	0	0	0	1	0	1	0	11.63	0.69	0.64	35.86	11515.9	46.7		95.48	48.4631	359.44		6.7	1.51	4.47	1.28				#N/A	#N/A	#N/A
	0	78	1.65	60	22.0386	41.9206	48.9742	49.8252	57.2812	1	45.4474	53.5532	31	14	12	32	130	76	22	0	1	0	0	0	1	0	1	0	9.04	0.24	0.98	60.17	4041	27.5	0	128	35.7469	554	1.36	4.94	4.44	2.95	0.97	1		1.2	20.9333	21.7	21.3167
	0	48	1.59	49	19.3821	57.9077	63.73	63.2813	69.5615	1	60.8188	66.4214	68	9	10	16	110	78	5.5	0	0	0	1	0	1	1	0	0	1087	0.22	1.01	13.74	6114.7	9.5	0	71.15	77.9317	320.57	0.71	4.1	0.97	2.68	0.95	0		0.8	18.1333	20.0333	19.0833
	1	29	1.68	68	24.093	56.6603	59.4316	55.0883	56.5286	1	58.046	55.8084	86	3	3	9	131	89	9.5	0	0	0	0	0	1	0	0	0	7.2	0.22	0.19	3.71	7970.36	3.34	0	66.07	140.518	248.34	0.64	4.06	0.86	2.78	0.92	0		0.8	#N/A	#N/A	#N/A
	0	70	1.7	70	24.2215	41.4039	47.0468	61.1359	59.5992	1	44.2253	60.3675	42	12	1	34	141	78	14	0	0	1	0	0	1	1	0	0	8.69	0.56	0.72	6.71	15543.8	11.8	0	95.11	63.3687	266.42	1.02	4.86	2.23	3.31	0.84	0		0.8	#N/A	#N/A	#N/A
	0	56	1.62	60	22.8624	9.54482	10.5291	14.2707	10.4764	1	10.037	12.3736	51	9	28	32	138	91	15	0	0	0	0	0	1	1	1	1	9.51	0.2	0.92	4449.65	12439	6260	2	222	27.9243	349.2	2.03	7.07	5.11	4.43	0.96	0		1.3	23.4333	12.4333	17.9333
	0	53	1.68	58	20.5499	49.2183	51.0759	51.2862	57.2891	1	50.1471	54.2877	59	3	10	24	124	79	0.5	0	0	0	1	1	1	0	0	0	11.17	0.44	0.66	9.46	13084	14	0	100.22	61.9296	316.33	0.77	6.38	2.22	4.21	1.1	0		0.9	17.7333	19.3333	18.5333
	1	64	1.58	70	28.0404	48.0002	45.0351	15.4796	14.31	1	46.5176	14.8948	42	6	6	43	145	70	27	0	1	0	0	0	1	0	1	0	8.59			253.1	4192	120	0.5	141	46.4085	635.2		3.05	0.92	1.74	1.1	0		0.8	8.7	11.4	10.05
	1	68	1.57	52	21.0962	42.9759	52.2962	55.4395	58.0294	1	47.636	56.7344	43	17	5	30	139	78	10	0	0	0	0	0	1	0	0	0		0.19					0	63.8	72.1806	400.44	0.9	3.21	0.84	1.76	1.14	2	2.7	0.8	26.5667	25.3333	25.95
	1	47	1.72	83	28.0557	59.5061	65.4856	55.4116	56.5702	1	62.4959	55.9909	66	7	3	39	143	102	8	0	0	0	0	0	1	0	0	0	12.72	0.24	0.38	5.95	13464.9	9.06	0	61.67	153.954	158.35	0.56	4.85	0.9	3.25	0.88	0		0.8	34.0667	36.4333	35.25
	0	42	1.63	53	19.9481	66.8592	37.997	48.6681	45.6711	1	52.4281	47.1696	69	43	6	15	119	86	3	0	0	0	1	0	1	0	0	0	13.63	0.34	0.51	12.02	7329.3	9.96	0	72.73	87.8402	282.78		6.83	1.33	4.65	1.42	0		1.4	8.26667	10.4	9.33333
	0	61	1.58	61	24.4352	57.3067	57.9333	40.3649	46.9826	1	57.62	43.6737	48	1	14	36	117	72	22	0	0	0	0	0	1	0	0	0	8.13	0.27	1	2.82	7056.9	2.25	0	90.3	65.6409	391.66	0.88	4.45	1.26	2.69	1.32	3		0.9	38.1667	39.4667	38.8167
	0	82	1.6	55	21.4844	38.6021	45.2303	40.1965	32.4838	1	41.9162	36.3402	24	13	20	32	139	76	6	0	1	0	0	0	1	0	0	0	12.44	0.32	0.66	5.57	6615	4.17	0	79	49.6671	339.5	0.7	4.42	1.03	2.62	1.41	1		0.9	12.6	14.6667	13.6333
	0	64	1.63	50	18.8189	57.0737	56.9419	79.6398	76.1612	1	57.0078	77.9005	58	0	5	21	156	101	12	0	1	0	0	0	1	0	1	0	10.51	0.27	0.37	120.07	7165	97.3	0.5	91	51.3626	344.9	0.76	5.79	3.17	4.07	0.82	0		0.8	#N/A	#N/A	#N/A
	0	58	1.68	63	22.3214	45.8077	43.787	46.1562	49.4428	1	44.7973	47.7995	52	4	6	31	110	72	2.5	0	0	0	0	0	1	1	0	0	8.31	0.37	1.27	5.95	6911.9	4.65	0	89.73	70.8144	427.19	0.85	6.62	3.29	4.53	0.84	0		0.8	8.63333	4.96667	6.8
	0	49	1.6	52	20.3125	36.4056	54.4592	74.052	76.8867	1	45.4324	75.4694	72	33	3	16	127	86	1	0	1	0	1	0	1	1	0	0	12.93	0.31	0.44	18.64	10150.7	21.4	0	78.89	73.7782	279.52	0.83	3.99	0.77	2.36	1.16	2		0.9	8.63333	12.4333	10.5333
	1	52	1.56	55	22.6003	46.7849	45.8188	29.6224	29.5365	1	46.3018	29.5794	56	2	0	28	163	98	12	0	1	0	0	0	1	0	1	0	11.16	0.18	0.25	1508.83	2344	400	2	83	71.7253	403.1	0.93	8.68	5.06	5.44	1.5	0		0.8	33.6	33.1333	33.3667
	1	77	1.51	50	21.9289	53.7404	55.7828	55.559	55.1733	1	54.7616	55.3661	33	3	1	31	145	86	12	0	1	0	0	0	1	1	0	0	12.05	0.26	0.41	17.76	1991	4	0	74	52.3581	280.3	1.19	4.53	2.04	3.01	0.85	1		0.9	20.9	37.7333	29.3167
	1	48	1.65	60	22.0386	43.4159	55.6212	72.7215	67.7599	1	49.5186	70.2407	70	23	6	19	128	83	13	0	0	0	0	0	1	1	0	0	7.44	0.32	1.28	2.51	7701	2.19	0	69	98.4	244.1	0.72	4.57	0.65	2.67	1.45	0		0.8	#N/A	#N/A	#N/A
	0	71	1.6	69	26.9531	42.457	45.0477	38.1333	46.697	1	43.7523	42.4151	37	6	19	40	159	85	6	0	1	1	0	0	1	1	1	0	11.2	0.36		100.9	8666.81	98.9	0.5	78.47	74.6276	234.9	0.73	3.48	0.7	2.24	0.94	0		0.1	7.3	9.06667	8.18333
	1	61	1.5	49	21.7778	44.0496	50.0281	67.4972	70.1479	1	47.0389	68.8225	55	12	4	29	134	86	3.5	0	0	0	0	0	1	0	1	0		0.51	0.91	72.83	3618	29.8	0.5	59	80.7005	230	0.71	4.79	1.08	3.18	1.15	0		0.8	#N/A	#N/A	#N/A
	1	55	1.48	48	21.9138	14.424	21.7861	55.7824	56.8526	1	18.105	56.3175	57	36	1	27	78	64	13.5	0	1	1	0	0	1	1	1	0	12.78	0.23	0.49				2	243.32	20.6247	344.97	2.08	6.12	4.18	4.07	0.94	3		1	#N/A	#N/A	#N/A
	1	59	1.68	59	20.9042	56.2875	53.3914	43.1776	46.5418	1	54.8394	44.8597	50	5	8	30	121	85	8	0	0	0	0	0	1	1	0	0	11.31	0.3	0.44	5.21	3394.9	2	0	67.27	87.3817	289.49		4.38	1.53	2.63	1.5	0		1.1	#N/A	#N/A	#N/A
	1	69	1.54	55	23.1911	35.363	29.5343	42.7003	38.1128	1	32.4487	40.4066	39	14	11	35	164	99	23	0	1	0	0	0	1	0	1	0	10.62	0.99	1.67	84.09	4121.7	39.2	0	105.13	45.6877	421.15	0.93	5.57	4.04	3.68	0.79	2		0.9	20.2667	24.1	22.1833
	0	44	1.72	76	25.6896	31.3773	29.2064	39.7299	41.5117	1	30.2918	40.6208	66	6	4	25	158	101	13	0	1	0	0	0	1	1	1	0	12.82	0.37	0.36	2504.2	11121.9	3150	2	163.11	55.0186	676.48	2.37	4.05	2.01	2.76	0.63	1	3.3	0.9	7.93333	7.1	7.51667
	1	58	1.58	56	22.4323	39.7976	42.1751	55.4318	47.1344	1	40.9863	51.2831	53	4	14	31	110	70	8	0	0	0	0	0	1	0	1	0	8.19	0.08	0.46	117.4	3268.69	43.4	0	75.31	74.9988	212.99		5.19	0.69	3.08	1.81	0		0.8	#N/A	#N/A	#N/A
	1	49	1.52	52	22.5069	31.8469	33.8979	77.0359	73.0442	1	32.8724	75.0401	72	5	5	19	132	90	2.5	0	0	0	0	0	0	0	0	0	10.36	0.15	0.21	19.59	9703	21.5	0.5	65	89.544	218.7	0.58	4.11	0.8	2.52	1.19	0		0.8	14.9	28.5333	21.7167
	0	27	1.76	95	30.6689	54.9632	60.7763	68.8969	75.5262	1	57.8697	72.2115	94	9	9	13	125	86	0.001	0	0	0	1	0	1	0	0	0	13.58	0.35	0.37	3.64	5590	2.3	0	76	173.737	466.9	0.56	3.67	1.14	2.24	1.01				9.23333	12.5	10.8667
	0	64	1.62	57	21.7193	59.6796	63.9998	83.9884	83.3877	1	61.8397	83.6881	65	6	1	21	145	86	6	0	0	0	1	0	1	0	0	0	9.51	0.37	0.77	15.7	15770	28	0.5	94	56.6847	318		5.12	2.48	3.39	1.71	3	2.2	1.3	15.4667	15.7667	15.6167
	0	62	1.63	55	20.7008	31.9196	26.9302	47.0521	37.6311	1	29.4249	42.3416	47	15	19	31	158	93	0.001	0	1	0	1	0	0	0	1	0	12.75	0.12	0.05	1585.11	11156	2000	2	104	50.7375	414.1	1.04	5.87	0.77	4.04	1.18	2		1.6	15.7	22.2	18.95
	1	58	1.58	60	24.0346	57.0784	62.1415	68.7494	69.3817	1	59.6099	69.0656	58	8	0	30	149	79	12	0	1	0	0	0	1	0	0	0	8.53	0.06	0.32	6.52	4569	3.37	0	65	93.1015	274.8	0.84	6.18	1.18	4.13	1.32	0		0.8	17.3	13.6667	15.4833
	0	49	1.69	49	17.1563	40.3087	44.2554	10.3215	8.68357	1	42.282	9.50252	58	9	10	19	132	78	0.1	0	1	0	1	1	1	0	1	0	9.63	0.15	0.08	63.6	12109	87.1		53	103.482										7.2	9.4	8.3
	0	46	1.72	73	24.6755	22.8186	25.8271	40.2484	34.5795	1	24.3228	37.4139	64	11	12	25	120	84	13	0	0	0	0	0	1	0	1	1	11.99	0.35	0.46	43.2	5341.4	26.1	0	96.23	87.7092	415.77		5.26	0.82	3.53	1.19				8.73333	8.46667	8.6
	0	66	1.63	60	22.5827	30.3069	35.5122	47.7817	56.5156	1	32.9095	52.1486	44	16	15	33	146	82	10	0	1	0	0	0	1	0	0	0	5.89	0.34	1.87				2	94.48	57.8027	410.14	1.02	4.47	0.5	2.8	1.21				7.2	7.5	7.35
	0	45	1.72	65	21.9713	40.2067	51.451	58.52	53.3762	1	45.8289	55.9481	68	21	10	19	142	92	12	0	0	0	1	0	1	0	1	0	8.89	0.45	0.28	1111.9	3156.91	397	0.5	110.5	68.7353	432.7	1.95	3.58	0.66	2.22	0.95	0		0.8	#N/A	#N/A	#N/A
	1	58	1.61	55	21.2183	40.9741	48.6843	66.9725	68.9441	1	44.8292	67.9583	58	16	2	27	127	81	4	0	0	0	1	0	1	0	0	0	6.73	0.27			4288.3	2	0	79.39	69.874	367.42	1.05	5.67	1.69	3.83	0.99	2		0.9	16.3333	30.1333	23.2333
	1	70	1.51	53	23.2446	52.2603	65.5806	80.8151	73.0242	1	58.9204	76.9197	50	21	9	28	150	81	20	0	1	0	0	0	1	0	0	0	12.08	0.23	0.41	20.93	8873.23	21	0	84.98	53.6985	366.1	0.98	4.38	1.03	2.82	1.05	2		0.9	20.2	24	22.1
	0	75	1.6	55	21.4844	37.4161	36.7327	40.2666	45.8541	1	37.0744	43.0604	33	0	13	32	120	70	15	1	1	0	0	0	1	1	1	0	11.84	0.07	0.44	53.56	5910	35.8	0	71	61.9331	299.9	0.81	5.4	1.21	3.38	1.2	3		1	9.4	13.6667	11.5333
	1	66	1.6	70	27.3437	29.6961	25.7315	33.7497	34.2081	1	27.7138	33.9789	41	13	0	41	141	89	15	0	1	0	0	0	1	0	0	0	11.57	0.47	2.23	17.62	12797.5	25.5	0	87.06	73.184	476.02	0.95	6.56	4.31	4.28	1.33	0		0.8	5.53333	6.16667	5.85
	0	54	1.73	84	28.0664	41.0628	39.2403	59.9292	64.0045	1	40.1516	61.9669	60	4	6	34	195	132	0.1	0	1	0	1	0	1	0	1	0		0.56		118.23	16602.5	222	0.5	116.88	76.0226	364.38		5.57	2.4	3.84	0.91	2		0.9	10.7	12.9	11.8
	1	71	1.57	56	22.719	56.3238	61.2193	57.9594	52.1584	1	58.7716	55.0589	39	8	10	33	156	88	12	0	1	0	0	0	1	0	1	1	13.56	0.28	0.32	691.04	3173.1	248	0.5	74	64.2259	418.14	0.82	5.82	1.7	4.03	0.94				#N/A	#N/A	#N/A
	0	50	1.73	65	21.7181	38.1918	42.0307	87.5176	86.5446	1	40.1112	87.0311	88	9	1	9	127	71	12	0	0	0	1	1	1	0	0	0	8.84	0.29	0.74	6.06	12370.4	8.48	0	97.67	73.6715	400.75	0.97	6.75	1.24	4.53	1.17	0		1.3	18.4667	17.6	18.0333
	1	68	1.54	58	24.4561	56.1902	55.7126	72.2511	72.4804	1	55.9514	72.3657	49	0	0	31	155	96	13	0	1	0	0	0	1	0	0	0	11.2	0.35	0.95	15.7	3164.4	5.62	0	69.92	73.4622	285.81	0.57	7.03	2.81	4.5	1.11	0		1.1	14.1	14.3	14.2
	1	71	1.5	48	21.3333	35.2933	39.4092	59.5133	58.7296	1	37.3512	59.1215	40	10	1	30	146	86	11	0	1	0	0	0	0	0	0	0	9.98	0.13	0.21	3.85	12436.3	5.41	0		#DIV/0!							0		1	16.5333	16.1	16.3167
	0	71	1.59	49	19.3821	30.3408	33.6711	28.9664	28.3681	1	32.006	28.6672	35	11	3	30	158	92	22	0	1	1	1	0	1	0	1	1	10.87	0.23	0.15	948.56	6599.4	708	2	121.48	34.233	330.65	1.33	5.13	1.92	3.05	1.35	0		1	#N/A	#N/A	#N/A
	0	48	1.67	75	26.8923	57.2713	59.9392	63.0033	63.0841	1	58.6053	63.0437	67	5	0	27	128	88	3	0	0	0	0	0	1	1	0	0	11.41	0.25	0.49	22.12	14471	36.2	0.5	82	103.5	315.5	0.64	6.34	1.29	3.92	1.59	1		0.9	6.43333	10.2667	8.35
	0	64	1.68	90	31.8878	53.1692	60.9356	67.8665	73.1073	1	57.0524	70.4869	52	13	6	42	147	87	12	1	1	0	0	0	1	0	1	0	9.55	0.55	2.06	770.74	4623.1	403	0.5	131.22	64.1152	498.48	1.63	4.68	2.53	3.02	0.94	3		1	#N/A	#N/A	#N/A
	0	70	1.5	50	22.2222	66.8567	61.5814	47.8021	49.2201	1	64.2191	48.5111	39	7	2	33	127	86	15	0	0	0	0	0	1	0	0	0	7.9	0.4	1.12	5.7	3942	2.54	0	77	55.9091	437.3		4.58	1.72	2.99	1.14	2		0.9	#N/A	#N/A	#N/A
	1	59	1.54	58	24.4561	45.4347	54.1867	74.3815	79.6119	1	49.8107	76.9967	62	16	7	29	119	78	10	0	0	0	0	0	1	0	1	0	10.9	0.72	0.99	122.7	5317.9	73.8			#DIV/0!			1.86		3.71		0		0.8	21.3	18.7	20
	1	56	1.58	50	20.0288	65.0139	57.0396	68.194	69.8679	1	61.0268	69.0309	60	12	2	23	135	74	1	0	0	0	0	0	1	0	0	0	7.68	0.46	1.03	13.05	4018.51	5.93	0	60.69	85.1211	357.4	0.71	4.81	2.54	2.71	1.37	0		1.3	27.4333	29.6	28.5167
	0	56	1.52	53	22.9398	56.5046	57.0628	62.4978	64.744	1	56.7837	63.6209	58	0	4	28	138	80	0.1	0	0	0	0	0	1	0	0	0	12.6	0.14	0.45	27.45	5251	16.3	0	66	82.9691	153.8	0.55	1.14	0.72	2.37	1.37	2	1.5	0.9	9.9	8.33333	9.11667
	1	54	1.53	52	22.2137	52.5856	57.6785	46.5502	56.1228	1	55.1321	51.3365	57	8	16	27	189	111	13	0	1	0	0	0	1	1	0	0								84.02	65.4673	361.08	1	5.77	3.96	3.77	1.03				7.86667	7.9	7.88333
	0	58	1.7	70	24.2215	23.973	21.8605	26.6464	17.4088	1	22.9167	22.0276	49	8	37	35	123	90	13	0	1	1	1	1	1	0	1	0	10.69	0.05	0.41	571.42	12719	822	2	102.89	68.6189	485.38	0.79	5.21	1.11	3.58	0.99	3		1.2	12.1667	8.66667	10.4167
	1	66	1.58	48	19.2277	29.2548	26.1545	24.1887	28.4489	1	27.7047	26.3188	41	10	14	30	136	71	15	0	1	0	0	0	1	1	0	0	8.51	0.38	0.72	9.04	10273	10.5	0	49.02	89.1261	188.6		4.52	1.67	2.93	1.1	2		0.9	14.8667	10.2667	12.5667
	1	54	1.5	49	21.7778	31.8789	42.1223	64.6067	47.7823	1	37.0006	56.1945	58	23	26	26	152	98	6	0	1	0	0	0	1	1	1	0	16.98	0.22	0.2	2294.37	3892.2	1010	2	62.04	83.5464	361.06	0.62	10.36	1.79	7.16	1.63	0		1.2	7.23333	12.0333	9.63333
	0	65	1.76	69	22.2753	27.4623	26.5487	12.8474	14.8822	1	27.0055	13.8648	41	0	13	35	151	85	13	0	1	1	0	0	1	1	1	0	9.52	0.33	0.79	183.18	8736.6	181	0	81.95	77.6724	377.8	0.75	4.68	2.19	3.04	0.85	2		1.2	30.9	24.5333	27.7167
	0	63	1.66	6.5	2.35883	32	40	26	36	1	36	31	44	20	27	36	128	84	4	0	0	0	1	0	1	0	0	0	12.3	0.16	0.38	7.69	18618	16.2	0	83.2	7.39922	276.06	0.79	4.69	3.27	3.27	0.69	3		0.9	#N/A	#N/A	#N/A
	1	69	1.5	5	2.22222	28	36	51	47	1	32	49	40	7	22	33	131	78	22	0	0	0	0	0	1	1	1	0	15.28	0.08	0.18	56.67	10266.5	65.8	0	102.61	4.25543	238.9	0.69	7.07	1.38	4.55	1.77	2		1.6	#N/A	#N/A	#N/A
	1	64	1.58	5.8	2.32335	55	48	72	70	1	51.5	71	53	2	12	30	130	85	16	0	0	0	0	0	1	1	0	0	7.06	0.59	1	5.15	4980	2.9	0	68.6	7.90356	278.02	0.79	6.24	2.21	4.43	1.01	0		0.8	#N/A	#N/A	#N/A
	1	50	1.58	7.4	2.96427	58	64	61	63	1	61	62	64	3	9	33	130	75	5	0	0	0	0	0	1	1	0	0	12.6	0.15	0.42	4.3	17501	8.52	0	75.55	10.8429	201.25	0.62	6.36	1.26	4.38	1.53	0		1.1	8.2	8.3	8.25
	0	54	1.58	4.2	1.68242	67	60	70	71	1	63.5	70.5	63	1	10	17	105	75	0.2	0	0	0	0	0	1	0	1	0	13.38	0.15	0.2	158.62	4604.4	82.6	0	68.03	6.53059	307	0.66	4	1.05	2.23	1.5	1		1.2	21.5667	16.4667	19.0167
	0	58	1.78	6.9	2.17776	57	71	81	79	1	64	80	66	2	9	23	132	90	0.01	0	0	0	0	0	1	0	0	0	12.9	0.47	0.48	5.74	10164.9	6.6	0	88.79	7.83798	88.79		7.62	2.4	5.14	1.19	0	0	0.8	10.8	8.8	9.8
	1	80	1.49	57	25.6745	65.1023	57.2251	78.3487	70.2869	1	61.1637	74.3178	37	12	10	32	146	80	7	1	0	1	1	0	1	0	0	0	10.95	0.06	0.15		2458	2	0	64.35	65.3706	218.29	0.67	4.26	0.36	2.33	1.87	3	3.2	1.3	11.5333	13.3333	12.4333
	1	51	1.53	39	16.6603	34.9807	43.0399	67.3406	56.2374	1	39.0103	61.789	63	18	16	16	127	86	3.5	0	0	0	0	0	1	0	0	0	14.79	0.02	0.06	17.12	4591.64	8.89	0	68.74	62.1084	157.12	0.56	3.95	1.1	2.28	1.1	0		0.9	50	50	50
	0	53	1.74	49	16.1844	58.9871	67.4078	66.6212	65.1164	1	63.1975	65.8688	62	11	2	16	134	86	2	0	0	0	0	0	1	0	0	0	7.22	0.02	0.14		4115.05	2	0	67.74	77.4061	300.16	0.78	4.71	0.5	2.04	2.49	0		0.9	11.1333	11.2333	11.1833
	0	47	1.72	50	16.901	17.4312	19.4592	12.2124	12.8632	1	18.4452	12.5378	60	10	7	17	134	86	4	0	0	0	1	0	1	1	0	0		0.11	0.29					45	127.1	5.26		2.82	1.14	0.99	1.31				#N/A	#N/A	#N/A
	1	57	1.65	67	24.6097	48.4845	41.8207	8.75854	12.5358	1	45.1526	10.6472	49	12	30	36	136	82	12	0	0	0	0	0	1	1	0	0	7	0.75	0.72	18.95	4382.25	9.39	0	84.84	80.6227	353.39	1.02	6.39	2.54	4.3	0.89	2		0.9	7.06667	8.93333	8
	1	55	1.57	42	17.0392	57.6059	64.9996	67.1611	71.652	1	61.3028	69.4065	62	10	6	18	120	78	1.2	0	0	0	0	0	1	0	0	0	8.71	0.03	0.14	7.05	3086	2.46	2.46	65	67.5554	244.8	0.61	7.2	0.89	4.54	2.01	0		0.8	17.6	11.6333	14.6167
	0	59	1.7	55	19.0311	27.3318	30.9344	47.5967	50.3346	1	29.1331	48.9657	51	12	4	27	118	85	6	0	0	0	0	0	1	1	0	0	11.84	0.02	0.09					69.02	79.3922	207.34	0.85	4.23	1	2.67	1.26	2		1	11.5667	22.1	16.8333
	0	41	1.76	70	22.5981	27.0554	29.6745	72.2391	68.9212	1	28.365	70.5801	78	10	4	14	117	77	2	0	0	0	0	0	1	0	0	0	12.17	0.28	0.38	3.16	9114.2	3.26	0	87.43	97.494	373.86	0.58	3.71	2.3	2.37	0.8	0		1.2	8.1	12.6	10.35
	0	73	1.56	57	23.4221	46.1101	42.5281	54.3606	66.1409	1	44.3191	60.2508	38	6	18	33	136	82	0.2	0	0	1	1	0	1	0	0	0	16.13	0.2	0.18	5.76	3071.5	2	0	100.8	46.6009	235.74	1.04	5.47	0.79	3.59	1.23	1		0.9	12.8333	13.4333	13.1333
	1	41	1.59	53	20.9644	51.4015	59.355	60.9962	62.7475	1	55.3782	61.8718	74	13	3	14	139	90	3	0	1	0	0	0	1	0	1	0	10.06	0.62	0.97	128.95	5451	79.5	0.5	68	94.909	229.3	0.68	8.33	4.5	5.33	1.4				9.13333	9.83333	9.48333
	0	63	1.62	67	25.5296	51.5544	62.2583	55.5995	54.5273	1	56.9063	55.0634	48	16	1	37	146	74	13	0	1	1	0	0	1	0	0	0	10.85	0.7	1.08	7.93	13933	12.5	0	60	105.759			5.37	3.64	3.45	0.87	2		0.9	13.6667	21.7333	17.7
	0	65	1.56	52	21.3675	48.1936	50.7934	56.3207	54.9363	1	49.4935	55.6285	46	5	1	31	137	80	12	0	1	0	0	0	0	0	0	0	8.3	1.02	1.46	32.18	4506	16.4	0.5	91	52.7143	333.6		3.02	0.8	1.81	0.88	0		0.8	#N/A	#N/A	#N/A
																																																#N/A	#N/A
[truncated: 1 more columns]

## Sheet: Sheet1
Gender													Gender			Gender
Age													Age			Age
DoB													DoB			Height
PID													PID			Weight
Date													Date			BMI
Time													Time			MDZ右手电导率
R_Hand													R_Hand			MGZ左手
R_Foot													R_Foot			PDZ右脚
QoM													QoM			PGZ左脚
Height													Height			0无泌汗异常
Weight													Weight			双手ESC平均
HB1AC													HB1AC			双脚ESC平均
Waist													Waist			Nephro Sc.肾病风险评分
MDZ右手电导率													MDZ右手电导率			Hands_Asym双手不对称
MGZ左手													MGZ左手			Feet_Asym双脚不对称
PDZ右脚													PDZ右脚			CAN 风险评分
PGZ左脚													PGZ左脚			收缩压
0无泌汗异常													泌汗功能分组			舒张压
双手ESC平均													双手ESC平均			糖尿病病程
双脚ESC平均													双脚ESC平均			冠心病（有1无0）
Nephro Sc.肾病风险评分													肾病风险			高血压
Hands Asym双手不对称													双手不对称			脑梗
Feet Asym双脚不对称									双手不对称				双足不对称			吸烟
CAN 风险评分									can				can			饮酒
收缩压									收缩压				收缩压			糖尿病周围神经病变
舒张压									舒张压				舒张压			糖尿病视网膜病变
糖尿病病程									糖尿病病程				糖尿病病程			糖尿病肾病
糖尿病类型（3成人隐匿性自身免疫性糖尿病 ）									糖尿病类型				糖尿病类型			糖尿病足
冠心病（有1无0）									冠心病				冠心病			糖化血红蛋白
高血压									高血压				高血压			空腹C肽
脑梗									脑梗				脑梗			餐后C肽
吸烟									吸烟				吸烟			尿蛋白/肌酐比值
饮酒									饮酒				饮酒			尿肌酐
糖尿病周围神经病变									糖尿病周围神经病变				糖尿病周围神经病变			尿微量白蛋白
糖尿病视网膜病变									糖尿病视网膜病变				糖尿病视网膜病变			尿常规蛋白
糖尿病肾病									糖尿病肾病				糖尿病肾病			血肌酐
糖尿病足									糖尿病足				糖尿病足			eGFR
糖化血红蛋白									糖化血红蛋白				糖化血红蛋白			血尿酸
空腹C肽									空腹C肽				空腹C肽			胱抑素C
餐后C肽									餐后C肽				餐后C肽			总胆固醇
尿蛋白/肌酐比值									VAR00041				尿ACR			甘油三酯
尿肌酐									尿肌酐				尿肌酐			LDL
尿微量白蛋白									尿微量白蛋白				尿微量白蛋白			HDL
尿常规蛋白									尿常规蛋白				尿常规蛋白			B超颈动脉
血肌酐									血肌酐				血肌酐			斑块（1软斑2硬斑3混合斑块）
血尿酸									血尿酸				血尿酸			斑块厚度
胱抑素C									胱抑素C				胱抑素C			内中膜
总胆固醇									总胆固醇				总胆固醇			左侧踝肱指数
甘油三酯									甘油三酯				甘油三酯			右侧踝肱指数
LDL									LDL				LDL			左足感觉阈值
HDL									HDL				HDL			右足感觉阈值
B超颈动脉									B超颈动脉				B超颈动脉
斑块（1软斑2硬斑3混合斑块）									VAR00053				斑块类型
斑块厚度									斑块厚度				斑块厚度
内中膜									内中膜				内中膜
左侧踝肱指数									左侧踝肱指数				左侧踝肱指数
右侧踝肱指数									右侧踝肱指数				右侧踝肱指数
左足感觉阈值									左足感觉阈值				左足感觉阈值
右足感觉阈值									右足感觉阈值				右足感觉阈值

## Sheet: Sheet2
			0男1女
							组统计量
			1	0	p			泌汗功能分组	N	均值	标准差	均值的标准误		独立样本检验
		0	96	93	0.17	0.492063	Gender	.00	189	0.507937	0.501265	0.0364617				方差方程的 Levene 检验		均值方程的 t 检验
		1	145	182		0.556575		1.00	327	0.443425	0.49755	0.0275146				F	Sig.	t	df	Sig.(双侧)	均值差值	标准误差值	差分的 95% 置信区间
				189		1	Age	.00	189	57.3386	11.981	0.871489											下限	上限
				327		1		1.00	327	59.7768	11.3808	0.629362		Gender	假设方差相等	2.31975	0.128355	1.41512	514	0.15764	0.0645114	0.0455873	-0.025049	0.154072
				188		1	BMI	.00	188	23.1273	4.85752	0.354271			假设方差不相等			1.4123	390.121	0.158659	0.0645114	0.0456783	-0.025295	0.154318
				327		1		1.00	327	23.5841	17.1055	0.945935		Age	假设方差相等	0.205197	0.650749	-2.29949	514	0.0218772	-2.43813	1.06029	-4.52118	-0.355092
				188		1	SBP	.00	188	137.707	18.4804	1.34782			假设方差不相等			-2.26807	376.217	0.0238915	-2.43813	1.07498	-4.55186	-0.324404
				327		1		1.00	327	138.07	21.4072	1.18382		BMI	假设方差相等	0.604602	0.437186	-0.357796	513	0.720643	-0.456762	1.2766	-2.96477	2.05125
				188		1	DBP	.00	188	85.7394	11.0338	0.804722			假设方差不相等			-0.452196	409.811	0.651367	-0.456762	1.0101	-2.44238	1.52886
				327		1		1.00	327	85.0612	12.7648	0.705897		SBP	假设方差相等	1.42953	0.232394	-0.194459	513	0.845894	-0.36289	1.86615	-4.02913	3.30335
				188		1	duration	.00	188	7.72821	6.77929	0.494431			假设方差不相等			-0.202292	437.469	0.839783	-0.36289	1.79389	-3.88861	3.16283
				327		1		1.00	327	8.85258	7.95381	0.439847		DBP	假设方差相等	1.06451	0.302675	0.609239	513	0.542636	0.6782	1.11319	-1.50878	2.86518
			5	184	0.347	0.026455	冠心病	.00	189	0.026455	0.16091	0.0117045			假设方差不相等			0.633564	437.062	0.526697	0.6782	1.07045	-1.42567	2.78207
			15	312		0.0458716		1.00	327	0.0458716	0.209527	0.0115869		duration	假设方差相等	0.000800765	0.977436	-1.62776	513	0.10419	-1.12437	0.690745	-2.48141	0.23267
				189		0	Hypertension	.00	189	0.428571	0.496186	0.0360922			假设方差不相等			-1.69906	441.49	0.0900131	-1.12437	0.661761	-2.42496	0.176224
				327		0		1.00	327	0.464832	0.499526	0.0276239		冠心病	假设方差相等	4.94011	0.0266746	-1.10005	514	0.271825	-0.0194165	0.0176506	-0.0540927	0.0152596
			27	162	0.79	0.142857	脑梗	.00	189	0.142857	0.350857	0.0255211			假设方差不相等			-1.17892	474.328	0.239019	-0.0194165	0.0164697	-0.0517791	0.0129461
			43	284		0.131498		1.00	327	0.131498	0.338463	0.018717		Hypertension	假设方差相等	2.73121	0.0990153	-0.796371	514	0.426184	-0.0362604	0.045532	-0.125712	0.0531914
			33	156	0.038	0.174603	Smoking	.00	189	0.174603	0.380636	0.0276872			假设方差不相等			-0.797804	394.668	0.425464	-0.0362604	0.0454503	-0.125615	0.0530945
			83	244		0.253823		1.00	327	0.253823	0.435864	0.0241033		脑梗	假设方差相等	0.52129	0.47062	0.362371	514	0.717224	0.0113587	0.0313455	-0.0502223	0.0729396
			14	175	0.861	0.0740741	Drinking	.00	189	0.0740741	0.262587	0.0191004			假设方差不相等			0.358897	381.054	0.719871	0.0113587	0.0316489	-0.0508696	0.073587
			23	304		0.0703364		1.00	327	0.0703364	0.256105	0.0141626		Smoking	假设方差相等	19.0167	1.56615e-05	-2.08153	514	0.03788	-0.0792195	0.0380583	-0.153988	-0.00445041
			81	108	0.001	0.428571	DPN	.00	189	0.428571	0.496186	0.0360922			假设方差不相等			-2.15804	436.395	0.0314697	-0.0792195	0.036709	-0.151368	-0.00707104
			291	36		0.889908		1.00	327	0.908257	0.289105	0.0159876		Drinking	假设方差相等	0.0999503	0.752018	0.158245	514	0.874326	0.00373768	0.0236196	-0.0426651	0.0501404
			48	141	0.226	0.253968	DR	.00	189	0.253968	0.436436	0.031746			假设方差不相等			0.157189	384.523	0.875178	0.00373768	0.0237783	-0.043014	0.0504894
			100	227		0.30581		1.00	327	0.30581	0.461456	0.0255186		DPN	假设方差相等	336.388	3.5664e-58	-13.8796	514	1.99294e-37	-0.479685	0.0345606	-0.547583	-0.411788
			31	158		0.164021	DKD	.00	189	0.164021	0.371278	0.0270065			假设方差不相等			-12.1517	263.173	2.87174e-27	-0.479685	0.0394747	-0.557412	-0.401959
			130	197		0.397554		1.00	327	0.397554	0.490142	0.0271049		DR	假设方差相等	6.70063	0.00991078	-1.25394	514	0.210433	-0.0518421	0.0413433	-0.133065	0.0293805
						0	DF	.00	189	0.026455	0.16091	0.0117045			假设方差不相等			-1.2728	410.587	0.203811	-0.0518421	0.0407309	-0.131909	0.028225
						0		1.00	327	0.0244648	0.154724	0.00855626		DKD	假设方差相等	172.221	3.89304e-34	-5.67551	514	2.31309e-08	-0.233532	0.0411474	-0.31437	-0.152695
							HbA1c	.00	185	9.98043	2.38201	0.175129			假设方差不相等			-6.1034	477.876	2.14904e-09	-0.233532	0.0382626	-0.308716	-0.158349
								1.00	320	13.4433	60.2589	3.36858		DF	假设方差相等	0.0768962	0.78166	0.138718	514	0.889727	0.00199019	0.014347	-0.0261958	0.0301762
							FCP	.00	185	0.375222	0.238743	0.0175527			假设方差不相等			0.137269	380.033	0.89089	0.00199019	0.0144984	-0.026517	0.0304974
								1.00	322	0.397739	0.370527	0.0206487		HbA1c	假设方差相等	1.31506	0.252025	-0.780951	503	0.435199	-3.46288	4.43418	-12.1747	5.24892
							PCP	.00	183	0.819923	0.649971	0.0480472			假设方差不相等			-1.02661	320.723	0.305379	-3.46288	3.37313	-10.0991	3.17337
								1.00	311	1.11128	5.4664	0.309971		FCP	假设方差相等	7.90728	0.00511519	-0.742586	505	0.458078	-0.0225175	0.0303231	-0.0820925	0.0370574
							尿ACR	.00	178	92.0353	355.526	26.6478			假设方差不相等			-0.830872	498.459	0.406444	-0.0225175	0.027101	-0.0757639	0.0307289
								1.00	293	368.802	1264.38	73.8656		PCP	假设方差相等	1.49074	0.222687	-0.717748	492	0.473253	-0.291356	0.405931	-1.08893	0.506216
							Cr	.00	186	86.5113	50.0612	3.67067			假设方差不相等			-0.928854	324.756	0.353654	-0.291356	0.313673	-0.908443	0.325731
								1.00	322	97.4457	58.0179	3.23321		尿ACR	假设方差相等	24.7864	9.0142e-07	-2.85168	469	0.0045408	-276.767	97.0539	-467.481	-86.0526
							eGFR	.00	186	103.366	340.404	24.9596			假设方差不相等			-3.52456	362.814	0.000478463	-276.767	78.5253	-431.189	-122.345
								1.00	322	70.1233	31.0161	1.72846		Cr	假设方差相等	3.73599	0.0538096	-2.14921	506	0.0320918	-10.9344	5.08763	-20.9299	-0.938881
							UA	.00	184	346.383	102.913	7.58683			假设方差不相等			-2.23535	433.156	0.0259032	-10.9344	4.89157	-20.5485	-1.32021
								1.00	317	356.521	113.351	6.36645		eGFR	假设方差相等	3.46177	0.063383	1.74115	506	0.0822645	33.2426	19.0923	-4.26732	70.7525
							胱抑素C	.00	150	3.5404	32.6969	2.66969			假设方差不相等			1.32867	186.776	0.185577	33.2426	25.0194	-16.1143	82.5995
								1.00	269	1.05599	1.09699	0.0668848		UA	假设方差相等	0.821458	0.365192	-0.997805	499	0.318858	-10.1389	10.1612	-30.1028	9.82509
							CHOL	.00	184	5.26299	1.57543	0.116142			假设方差不相等			-1.0237	412.899	0.306575	-10.1389	9.90412	-29.6076	9.32992
								1.00	319	5.22498	1.62873	0.0911916		胱抑素C	假设方差相等	6.2424	0.0128567	1.24614	417	0.213411	2.48441	1.99368	-1.4345	6.40333
							TRIG	.00	184	2.22951	2.11264	0.155746			假设方差不相等			0.930309	149.187	0.353714	2.48441	2.67053	-2.79253	7.76136
								1.00	319	2.08442	2.09331	0.117203		CHOL	假设方差相等	0.108638	0.741837	0.25508	501	0.798766	0.0380048	0.148992	-0.254721	0.330731
							LDL	.00	184	3.28527	0.963537	0.0710329			假设方差不相等			0.257372	392.37	0.797027	0.0380048	0.147665	-0.252309	0.328319
								1.00	320	3.27728	1.01584	0.056787		TRIG	假设方差相等	0.411777	0.521362	0.746208	501	0.455892	0.145091	0.194437	-0.236922	0.527104
							HDL	.00	183	1.18961	0.43526	0.0321753			假设方差不相等			0.744367	379.007	0.457116	0.145091	0.194918	-0.238166	0.528348
								1.00	317	1.12471	0.388763	0.0218351		LDL	假设方差相等	0.937075	0.333497	0.086618	502	0.93101	0.00799049	0.0922498	-0.173253	0.189234
							内中膜	.00	158	0.961392	0.181194	0.014415			假设方差不相等			0.0878636	398.328	0.930029	0.00799049	0.0909419	-0.170796	0.186777
								1.00	276	0.994565	0.192229	0.0115709		HDL	假设方差相等	0.343444	0.558113	1.72024	498	0.08601	0.0648999	0.0377272	-0.00922426	0.139024
							VPT	.00	129	13.7938	6.64291	0.584875			假设方差不相等			1.66903	345.974	0.0960156	0.0648999	0.0388848	-0.0115804	0.14138
								1.00	230	17.2327	9.51782	0.627586		内中膜	假设方差相等	0.0403931	0.840809	-1.76598	432	0.0781061	-0.0331728	0.0187844	-0.070093	0.00374738
															假设方差不相等			-1.79463	343.161	0.073593	-0.0331728	0.0184845	-0.06953	0.00318438
														VPT	假设方差相等	10.666	0.00119689	-3.63594	357	0.000317701	-3.43888	0.945803	-5.29893	-1.57884
															假设方差不相等			-4.00862	340.29	7.50841e-05	-3.43888	0.857872	-5.12628	-1.75148

## Sheet: Sheet3
相关性
		HESC	FESC	Gender	Age	duration	SBP	DBP	Smoking	HbA1c	FCP	尿ACR	Cr	eGFR	内中膜	VPT	冠心病	DPN	DKD	DR
HESC	Pearson 相关性	1	0.68717	0.0780547	-0.156207	-0.097877	-0.0133896	0.0116763	-0.133962	-0.0558722	0.0288904	-0.1639	-0.164938	0.207666	-0.0820575	-0.244613	0.0301767	-0.407412	-0.21585	-0.101832
	显著性（双侧）		3.32388e-73	0.0767706	0.000373485	0.0263428	0.761788	0.791515	0.00231571	0.210046	0.516309	0.000354557	0.000188496	2.35184e-06	0.0877428	2.73154e-06	0.494412	5.17164e-22	7.61705e-07	0.0208149
	N	515	515	515	515	515	515	515	515	505	507	471	508	508	434	359	515	515	515	515
FESC	Pearson 相关性	0.68717	1	0.115651	-0.103524	-0.111594	-0.0458006	0.0118965	-0.0952036	-0.00247175	-0.0538844	-0.119757	-0.155534	0.156791	-0.0824604	-0.365794	0.0099238	-0.368827	-0.260307	-0.190201
	显著性（双侧）	3.32388e-73		0.00861433	0.0187769	0.011269	0.29955	0.787677	0.0307594	0.955813	0.225826	0.00928174	0.000434245	0.000389428	0.0861917	8.29727e-13	0.82224	4.85456e-18	2.01451e-09	1.38905e-05
	N	515	515	515	515	515	515	515	515	505	507	471	508	508	434	359	515	515	515	515
Gender	Pearson 相关性	0.0780547	0.115651	1	0.133149	0.0992503	0.0483756	-0.02064	-0.420384	-0.0394985	0.0628848	-0.0763499	-0.144146	0.00783232	-0.0378465	-0.0365515	-0.0471125	0.00397975	0.0151268	0.0676432
	显著性（双侧）	0.0767706	0.00861433		0.00243959	0.0242945	0.273171	0.64028	1.63749e-23	0.375744	0.157403	0.0979244	0.00112231	0.860216	0.431604	0.489964	0.285436	0.928141	0.731748	0.124885
	N	515	515	516	516	515	515	515	516	505	507	471	508	508	434	359	516	516	516	516
Age	Pearson 相关性	-0.156207	-0.103524	0.133149	1	0.364421	0.214421	-0.00638677	-0.134201	-0.113622	0.0658239	0.063075	0.152766	-0.622963	0.175287	0.421656	0.134831	0.263644	0.155847	0.166824
	显著性（双侧）	0.000373485	0.0187769	0.00243959		1.27936e-17	9.04326e-07	0.885036	0.00225137	0.0106097	0.138852	0.171748	0.000550328	6.12581e-56	0.000242912	6.59088e-17	0.00214514	1.185e-09	0.000380418	0.000140643
	N	515	515	516	516	515	515	515	516	505	507	471	508	508	434	359	516	516	516	516
duration	Pearson 相关性	-0.097877	-0.111594	0.0992503	0.364421	1	-0.0146937	0.0108124	-0.136698	-0.20142	0.00158353	0.069047	0.0981862	-0.241448	0.0358576	0.207009	0.114945	0.143491	0.0718756	0.176341
	显著性（双侧）	0.0263428	0.011269	0.0242945	1.27936e-17		0.739391	0.806624	0.00187572	5.06766e-06	0.971627	0.134575	0.0269044	3.58236e-08	0.456215	7.76716e-05	0.00903192	0.00109341	0.103258	5.73e-05
	N	515	515	515	515	515	515	515	515	505	507	471	508	508	434	359	515	515	515	515
SBP	Pearson 相关性	-0.0133896	-0.0458006	0.0483756	0.214421	-0.0146937	1	0.6375	-0.00177983	-0.100931	0.122497	0.138726	0.135602	-0.11624	0.0224424	0.0793497	0.0159238	0.0234264	0.167756	0.0533858
	显著性（双侧）	0.761788	0.29955	0.273171	9.04326e-07	0.739391		4.37517e-60	0.96786	0.0233104	0.00574791	0.00255031	0.00219176	0.00873258	0.641039	0.133463	0.718463	0.595827	0.000130839	0.226496
	N	515	515	515	515	515	515	515	515	505	507	471	508	508	434	359	515	515	515	515
DBP	Pearson 相关性	0.0116763	0.0118965	-0.02064	-0.00638677	0.0108124	0.6375	1	0.0636134	0.00970906	0.0880171	0.114405	0.0999539	0.0283991	-0.0202513	-0.0401481	-0.0696679	-0.0885526	0.0839236	-0.0246261
	显著性（双侧）	0.791515	0.787677	0.64028	0.885036	0.806624	4.37517e-60		0.149424	0.827703	0.0476132	0.0129754	0.0242629	0.523061	0.673964	0.448241	0.114314	0.0445749	0.0570066	0.57713
	N	515	515	515	515	515	515	515	515	505	507	471	508	508	434	359	515	515	515	515
Smoking	Pearson 相关性	-0.133962	-0.0952036	-0.420384	-0.134201	-0.136698	-0.00177983	0.0636134	1	0.0600566	0.0148896	0.00338812	0.0499248	0.02912	0.13488	0.085327	0.060221	0.0107322	0.0381378	-0.0233138
	显著性（双侧）	0.00231571	0.0307594	1.63749e-23	0.00225137	0.00187572	0.96786	0.149424		0.177827	0.738036	0.941539	0.261362	0.512563	0.00488256	0.106522	0.171977	0.807847	0.387293	0.597238
	N	515	515	516	516	515	515	515	516	505	507	471	508	508	434	359	516	516	516	516
HbA1c	Pearson 相关性	-0.0558722	-0.00247175	-0.0394985	-0.113622	-0.20142	-0.100931	0.00970906	0.0600566	1	-0.243156	0.0442897	-0.059599	0.0345758	0.0307471	0.0598366	-0.0600099	-0.0423269	0.10945	-0.0438039
	显著性（双侧）	0.210046	0.955813	0.375744	0.0106097	5.06766e-06	0.0233104	0.827703	0.177827		3.90066e-08	0.340091	0.184229	0.44137	0.526312	0.260826	0.178165	0.342495	0.0138592	0.325902
	N	505	505	505	505	505	505	505	505	505	498	466	498	498	427	355	505	505	505	505
FCP	Pearson 相关性	0.0288904	-0.0538844	0.0628848	0.0658239	0.00158353	0.122497	0.0880171	0.0148896	-0.243156	1	0.0909072	0.320834	-0.090763	-0.0174972	0.0204777	0.0436352	0.0897014	0.165219	0.126936
	显著性（双侧）	0.516309	0.225826	0.157403	0.138852	0.971627	0.00574791	0.0476132	0.738036	3.90066e-08		0.0498548	1.96237e-13	0.0424959	0.718134	0.701817	0.326809	0.0435016	0.00018644	0.00420033
	N	507	507	507	507	507	507	507	507	498	507	466	500	500	428	352	507	507	507	507
尿ACR	Pearson 相关性	-0.1639	-0.119757	-0.0763499	0.063075	0.069047	0.138726	0.114405	0.00338812	0.0442897	0.0909072	1	0.327567	-0.203461	0.138846	0.165029	0.04973	0.104404	0.344506	0.0765727
	显著性（双侧）	0.000354557	0.00928174	0.0979244	0.171748	0.134575	0.00255031	0.0129754	0.941539	0.340091	0.0498548		4.56685e-13	1.00016e-05	0.0050144	0.00244526	0.281451	0.0234507	1.43113e-14	0.0969461
	N	471	471	471	471	471	471	471	471	466	466	471	464	464	407	335	471	471	471	471
Cr	Pearson 相关性	-0.164938	-0.155534	-0.144146	0.152766	0.0981862	0.135602	0.0999539	0.0499248	-0.059599	0.320834	0.327567	1	-0.440654	0.0995216	0.0784387	0.0714673	0.0980872	0.290813	0.0893251
	显著性（双侧）	0.000188496	0.000434245	0.00112231	0.000550328	0.0269044	0.00219176	0.0242629	0.261362	0.184229	1.96237e-13	4.56685e-13		1.51663e-25	0.0395893	0.140787	0.107642	0.0270593	2.33414e-11	0.044183
	N	508	508	508	508	508	508	508	508	498	500	464	508	508	428	354	508	508	508	508
eGFR	Pearson 相关性	0.207666	0.156791	0.00783232	-0.622963	-0.241448	-0.11624	0.0283991	0.02912	0.0345758	-0.090763	-0.203461	-0.440654	1	-0.159252	-0.253713	-0.0617301	-0.242147	-0.275445	-0.195053
	显著性（双侧）	2.35184e-06	0.000389428	0.860216	6.12581e-56	3.58236e-08	0.00873258	0.523061	0.512563	0.44137	0.0424959	1.00016e-05	1.51663e-25		0.000945955	1.32443e-06	0.164764	3.2626e-08	2.69309e-10	9.50886e-06
	N	508	508	508	508	508	508	508	508	498	500	464	508	508	428	354	508	508	508	508
内中膜	Pearson 相关性	-0.0820575	-0.0824604	-0.0378465	0.175287	0.0358576	0.0224424	-0.0202513	0.13488	0.0307471	-0.0174972	0.138846	0.0995216	-0.159252	1	0.0202907	0.0506005	0.0584197	0.136147	0.0634066
	显著性（双侧）	0.0877428	0.0861917	0.431604	0.000242912	0.456215	0.641039	0.673964	0.00488256	0.526312	0.718134	0.0050144	0.0395893	0.000945955		0.724131	0.292902	0.224532	0.00449207	0.187355
	N	434	434	434	434	434	434	434	434	427	428	407	428	428	434	305	434	434	434	434
VPT	Pearson 相关性	-0.244613	-0.365794	-0.0365515	0.421656	0.207009	0.0793497	-0.0401481	0.085327	0.0598366	0.0204777	0.165029	0.0784387	-0.253713	0.0202907	1	0.0623328	0.378646	0.214771	0.248283
	显著性（双侧）	2.73154e-06	8.29727e-13	0.489964	6.59088e-17	7.76716e-05	0.133463	0.448241	0.106522	0.260826	0.701817	0.00244526	0.140787	1.32443e-06	0.724131		0.23877	1.10522e-13	4.07604e-05	1.91061e-06
	N	359	359	359	359	359	359	359	359	355	352	335	354	354	305	359	359	359	359	359
冠心病	Pearson 相关性	0.0301767	0.0099238	-0.0471125	0.134831	0.114945	0.0159238	-0.0696679	0.060221	-0.0600099	0.0436352	0.04973	0.0714673	-0.0617301	0.0506005	0.0623328	1	0.0532796	0.0381332	0.0280503
	显著性（双侧）	0.494412	0.82224	0.285436	0.00214514	0.00903192	0.718463	0.114314	0.171977	0.178165	0.326809	0.281451	0.107642	0.164764	0.292902	0.23877		0.226969	0.38735	0.524933
	N	515	515	516	516	515	515	515	516	505	507	471	508	508	434	359	516	516	516	516
DPN	Pearson 相关性	-0.407412	-0.368827	0.00397975	0.263644	0.143491	0.0234264	-0.0885526	0.0107322	-0.0423269	0.0897014	0.104404	0.0980872	-0.242147	0.0584197	0.378646	0.0532796	1	0.180102	0.15084
	显著性（双侧）	5.17164e-22	4.85456e-18	0.928141	1.185e-09	0.00109341	0.595827	0.0445749	0.807847	0.342495	0.0435016	0.0234507	0.0270593	3.2626e-08	0.224532	1.10522e-13	0.226969		3.87354e-05	0.00058646
	N	515	515	516	516	515	515	515	516	505	507	471	508	508	434	359	516	516	516	516
DKD	Pearson 相关性	-0.21585	-0.260307	0.0151268	0.155847	0.0718756	0.167756	0.0839236	0.0381378	0.10945	0.165219	0.344506	0.290813	-0.275445	0.136147	0.214771	0.0381332	0.180102	1	0.248059
	显著性（双侧）	7.61705e-07	2.01451e-09	0.731748	0.000380418	0.103258	0.000130839	0.0570066	0.387293	0.0138592	0.00018644	1.43113e-14	2.33414e-11	2.69309e-10	0.00449207	4.07604e-05	0.38735	3.87354e-05		1.12555e-08
	N	515	515	516	516	515	515	515	516	505	507	471	508	508	434	359	516	516	516	516
DR	Pearson 相关性	-0.101832	-0.190201	0.0676432	0.166824	0.176341	0.0533858	-0.0246261	-0.0233138	-0.0438039	0.126936	0.0765727	0.0893251	-0.195053	0.0634066	0.248283	0.0280503	0.15084	0.248059	1
	显著性（双侧）	0.0208149	1.38905e-05	0.124885	0.000140643	5.73e-05	0.226496	0.57713	0.597238	0.325902	0.00420033	0.0969461	0.044183	9.50886e-06	0.187355	1.91061e-06	0.524933	0.00058646	1.12555e-08
	N	515	515	516	516	515	515	515	516	505	507	471	508	508	434	359	516	516	516	516

## Sheet: Sheet4
		DPN	方程中的变量										去掉VPT的话
					B	S.E,	Wals	df	Sig.	Exp (B)	EXP(B) 的 95% C.I.			方程中的变量
											下限	上限				B	S.E,	Wals	df	Sig.	Exp (B)	EXP(B) 的 95% C.I.
			步骤 1a	Gender	0.15378	0.436884	0.123899	1	0.724843	1.16623	0.495347	2.74576										下限	上限
				Age	-0.00748629	0.0286058	0.0684896	1	0.793549	0.992542	0.938425	1.04978		步骤 1a	Gender	-0.230864	0.316764	0.53118	1	0.466111	0.793847	0.426685	1.47695
				duration	0.0465379	0.034967	1.77132	1	0.183219	1.04764	0.978244	1.12195			Age	0.0406512	0.017936	5.13682	1	0.0234235	1.04149	1.00551	1.07875
				BMI	0.0341367	0.0692064	0.243305	1	0.621829	1.03473	0.903476	1.18504			duration	0.0352091	0.0258652	1.85301	1	0.173434	1.03584	0.984634	1.0897
				Smoking	0.248519	0.6074	0.167405	1	0.682428	1.28212	0.389862	4.21648			BMI	-0.03679	0.0447543	0.675757	1	0.411052	0.963879	0.882932	1.05225
				HbA1c	0.0424786	0.0849154	0.250247	1	0.616901	1.04339	0.883422	1.23233			Smoking	-0.332427	0.387194	0.737112	1	0.390588	0.717181	0.335775	1.53183
				FCP	1.9061	0.999872	3.63414	1	0.0566057	6.7268	0.947798	47.742			HbA1c	0.0344524	0.0615203	0.31362	1	0.575467	1.03505	0.91748	1.16769
				Cr	-0.00653924	0.00308534	4.49211	1	0.0340517	0.993482	0.987492	0.999508			FCP	1.33651	0.704477	3.59925	1	0.0578056	3.80575	0.956727	15.1388
				eGFR	-0.0164292	0.0114103	2.07321	1	0.149905	0.983705	0.96195	1.00595			Cr	-0.00234799	0.00329167	0.508816	1	0.475652	0.997655	0.991239	1.00411
				LDL	-0.216394	0.207286	1.08981	1	0.296514	0.805418	0.536512	1.2091			eGFR	-0.00650594	0.0063283	1.05693	1	0.303917	0.993515	0.981268	1.00591
				内中膜	-0.592828	1.14842	0.266474	1	0.605707	0.552762	0.0582102	5.249			LDL	-0.11063	0.148176	0.557429	1	0.455298	0.89527	0.669616	1.19697
				尿ACR	0.000332904	0.00051678	0.414981	1	0.519452	1.00033	0.99932	1.00135			内中膜	-0.373615	0.741911	0.253598	1	0.614553	0.688242	0.160778	2.94616
				ESC	-0.0583738	0.0163603	12.7307	1	0.000359697	0.943297	0.91353	0.974035			ESC	-0.0860007	0.0127194	45.7164	1	1.36675e-11	0.917594	0.895001	0.940756
				VPT	0.315982	0.0639553	24.4101	1	7.78575e-07	1.3716	1.21001	1.55478			Hypertension	-0.163645	0.31282	0.273662	1	0.600885	0.849044	0.459894	1.56748
				Hypertension	-0.493042	0.43455	1.28733	1	0.256541	0.610765	0.260606	1.43141			ACR分级	-0.209335	0.23449	0.79696	1	0.372004	0.811123	0.512258	1.28435
				常量	2.71227	3.079	0.775974	1	0.378375	15.0635					常量	5.95086	2.07555	8.22041	1	0.00414217	384.084
		dr	方程中的变量
					B	S.E,	Wals	df	Sig.	Exp (B)	EXP(B) 的 95% C.I.
											下限	上限
			步骤 1a	Gender	0.369193	0.27093	1.85691	1	0.172982	1.44657	0.850594	2.46011
				Age	-0.00505538	0.0156588	0.104229	1	0.746813	0.994957	0.964885	1.02597
				duration	0.0244692	0.017187	2.02695	1	0.154531	1.02477	0.990826	1.05988
				BMI	0.0695001	0.0389859	3.17802	1	0.0746353	1.07197	0.993113	1.15709
				Smoking	-0.262957	0.348074	0.570725	1	0.449971	0.768775	0.388614	1.52083
				HbA1c	-0.0429915	0.050314	0.730109	1	0.392848	0.95792	0.867964	1.0572
				FCP	0.710819	0.461662	2.37067	1	0.123634	2.03566	0.823641	5.0312
				Cr	-0.00278892	0.00267505	1.08695	1	0.297149	0.997215	0.992	1.00246
				eGFR	-0.0170648	0.00702328	5.90368	1	0.0151093	0.98308	0.96964	0.996706
				LDL	0.199219	0.125609	2.51549	1	0.112732	1.22045	0.954117	1.56113
				内中膜	0.384711	0.637783	0.363851	1	0.546375	1.46919	0.420917	5.12814
				尿ACR	5.89086e-05	0.000104563	0.317394	1	0.573178	1.00006	0.999854	1.00026
				ESC	-0.0159426	0.00686443	5.39399	1	0.0202062	0.984184	0.971031	0.997515
				Hypertension	-0.12491	0.258901	0.232769	1	0.629478	0.882577	0.531344	1.46598
				常量	-1.0124	1.7083	0.351214	1	0.553426	0.363347
		DKD	有尿ACR的
			方程中的变量
					B	S.E,	Wals	df	Sig.	Exp (B)	EXP(B) 的 95% C.I.
											下限	上限
			步骤 1a	Gender	-0.00569681	0.403585	0.000199248	1	0.988738	0.994319	0.45081	2.1931
				Age	0.0326564	0.0228792	2.0373	1	0.153482	1.0332	0.987888	1.08058
				duration	-0.0110759	0.0238917	0.214913	1	0.642944	0.988985	0.943742	1.0364
				BMI	-0.0258297	0.0623069	0.171856	1	0.678467	0.974501	0.862475	1.10108
				Smoking	-0.538232	0.537661	1.00213	1	0.316796	0.583779	0.203512	1.67458
				HbA1c	0.0776532	0.0723108	1.15322	1	0.282876	1.08075	0.937936	1.2453
				FCP	1.3979	0.735613	3.61122	1	0.0573909	4.0467	0.957075	17.1102
				Cr	0.0114497	0.0109459	1.09417	1	0.29555	1.01152	0.990046	1.03345
				eGFR	-0.00798388	0.0109536	0.531268	1	0.466074	0.992048	0.970977	1.01358
				LDL	0.0972091	0.18605	0.272995	1	0.60133	1.10209	0.765335	1.58702
				内中膜	0.735438	0.841967	0.762961	1	0.382404	2.0864	0.400602	10.8663
				尿ACR	0.0243711	0.00368789	43.6711	1	3.88467e-11	1.02467	1.01729	1.0321
				ESC	-0.0184845	0.0100476	3.38449	1	0.0658127	0.981685	0.962542	1.00121
				Hypertension	-0.267891	0.380763	0.495002	1	0.481705	0.764991	0.362703	1.61348
				常量	-5.11275	2.69343	3.60326	1	0.0576662	0.00601952
			无尿ACR的
			方程中的变量
					B	S.E,	Wals	df	Sig.	Exp (B)	EXP(B) 的 95% C.I.
											下限	上限
			步骤 1a	Gender	0.331012	0.304412	1.1824	1	0.276869	1.39238	0.766726	2.52856
				Age	0.0125119	0.0175409	0.508796	1	0.475661	1.01259	0.97837	1.04801
				duration	0.00602914	0.0165794	0.132242	1	0.716118	1.00605	0.973881	1.03928
				BMI	-0.119411	0.0508844	5.50707	1	0.0189398	0.887443	0.803207	0.980513
				Smoking	-0.178975	0.349928	0.261595	1	0.609027	0.836127	0.421127	1.66009
				HbA1c	0.152811	0.0519673	8.64662	1	0.00327669	1.1651	1.05228	1.29003
				FCP	1.58006	0.598484	6.97012	1	0.00828817	4.85524	1.50238	15.6907
				Cr	0.0267814	0.00809215	10.9531	1	0.000934457	1.02714	1.01098	1.04356
				eGFR	-0.00235138	0.00928373	0.0641506	1	0.800052	0.997651	0.979663	1.01597
				LDL	0.202963	0.130434	2.4213	1	0.119695	1.22503	0.94868	1.58187
				内中膜	1.17732	0.673812	3.05288	1	0.0805942	3.24566	0.866468	12.1577
				ESC	-0.0194575	0.0071676	7.36931	1	0.00663465	0.980731	0.967049	0.994605
				Hypertension	0.358339	0.278086	1.66047	1	0.19754	1.43095	0.829693	2.46793
				常量	-4.34445	2.03653	4.55082	1	0.032903	0.0129786
			根据ACR分级的
			方程中的变量
					B	S.E,	Wals	df	Sig.	Exp (B)	EXP(B) 的 95% C.I.
											下限	上限
			步骤 1a	Gender	0.296933	0.524954	0.319944	1	0.571641	1.34573	0.480966	3.76529
				Age	0.01731	0.0294803	0.344772	1	0.557087	1.01746	0.960338	1.07798
				duration	-0.0160677	0.0334561	0.230651	1	0.631041	0.984061	0.921603	1.05075
				BMI	0.0469319	0.0737701	0.40474	1	0.524652	1.04805	0.906962	1.21109
				Smoking	0.171502	0.65369	0.068833	1	0.793044	1.18709	0.329656	4.27469
				HbA1c	0.119519	0.105526	1.2828	1	0.25738	1.12695	0.916395	1.38589
				FCP	1.76983	1.06509	2.76115	1	0.0965786	5.86987	0.727815	47.3408
				Cr	0.0190041	0.0130572	2.11833	1	0.145545	1.01919	0.993434	1.04561
				eGFR	-0.013978	0.0129849	1.15881	1	0.281713	0.986119	0.961339	1.01154
				LDL	0.226995	0.243399	0.869753	1	0.351024	1.25482	0.778756	2.02192
				内中膜	0.28975	1.07437	0.0727342	1	0.787397	1.33609	0.162679	10.9734
				ESC	-0.0436665	0.0139805	9.75551	1	0.00178786	0.957273	0.931399	0.983866
				Hypertension	-0.216967	0.497508	0.19019	1	0.662759	0.804956	0.303594	2.13428
				ACR分级	4.8823	0.541897	81.1735	1	2.06741e-19	131.933	45.6133	381.609
				常量	-11.5955	3.5519	10.6576	1	0.0010962	9.20723e-06
			方程中的变量
					B	S.E,	Wals	df	Sig.	Exp (B)	EXP(B) 的 95% C.I.
											下限	上限
			步骤 1a	Gender	0.0430524	0.493229	0.00761899	1	0.930444	1.04399	0.397064	2.74495
				Age	0.00871043	0.0282288	0.0952126	1	0.757652	1.00875	0.954453	1.06613
				duration	-0.0122466	0.0322602	0.144112	1	0.704227	0.987828	0.927303	1.0523
				BMI	0.0908965	0.0650857	1.9504	1	0.162544	1.09516	0.963995	1.24416
				Smoking	0.318151	0.643348	0.244554	1	0.620936	1.37458	0.38954	4.85053
				HbA1c	0.122592	0.10416	1.38521	1	0.239215	1.13042	0.921678	1.38644
				FCP	1.98611	1.03785	3.66215	1	0.0556617	7.28714	0.953095	55.7157
				eGFR	-0.0236494	0.010482	5.09039	1	0.0240588	0.976628	0.956769	0.9969
				LDL	0.196515	0.239963	0.670656	1	0.412823	1.21715	0.76048	1.94806
				内中膜	0.311585	1.10043	0.0801722	1	0.777064	1.36559	0.157989	11.8035
				ESC	-0.0443504	0.0140234	10.002	1	0.00156374	0.956619	0.930684	0.983276
				Hypertension	-0.0164577	0.472716	0.0012121	1	0.972227	0.983677	0.389472	2.48444
				ACR分级	4.85336	0.531845	83.2751	1	7.13924e-20	128.17	45.194	363.492
				常量	-9.75561	3.26001	8.95512	1	0.00276692	5.79688e-05

## Sheet: DKD ROC
																			曲线的坐标
																			检验结果变量	如果大于或等于则为正a	敏感度	1 － 特异性		曲线的坐标					曲线的坐标					曲线的坐标
												曲线下的面积							eGFR	0.54204	0.00303951	0		检验结果变量	如果大于或等于则为正a	敏感度	1 － 特异性		检验结果变量	如果大于或等于则为正a	敏感度	1 － 特异性		检验结果变量	如果大于或等于则为正a	敏感度	1 － 特异性
												检验结果变量	面积	标准误a	渐进 Sig.b	渐近 95% 置信区间								HESC	1.62112	0	0		FESC	1.62112	0	0	0	acr倒数	272.038	0.00303951	0
																下限	上限			3.25543	1	1			5.8388	1	1			3.44231	1	1	0
												eGFR	0.706667	0.0259926	1.87993e-13	0.655723	0.757612			5.16155	1	0.99359	0.00641026		7.84953	1	0.993711	0.00628931		5.58287	1	0.993711	0.00628931		-1	1	1	0
												HESC	0.636	0.0271317	2.2486e-06	0.579685	0.686039			6.17874	0.99696	0.99359	0.00337074		8.95247	1	0.987421	0.0125786		6.91747	0.996997	0.993711	0.00328631		3.22414e-05	0.984802	1	-0.0151976
												FESC	0.651	0.0273963	9.50699e-08	0.596195	0.703587			6.35524	0.99696	0.987179	0.009781		9.17996	0.996997	0.987421	0.00957561		7.9764	0.996997	0.987421	0.00957561		0.000105006	0.984802	0.99359	-0.00878731
												acr倒数	0.905064	0.0182151	3.89019e-47	0.869363	0.940765			6.47563	0.99696	0.980769	0.0161913		9.46141	0.993994	0.987421	0.00657261		8.91582	0.996997	0.981132	0.0158649		0.000151681	0.984802	0.987179	-0.00237706
												eGFR	0.706667	0.0259926	1.87993e-13	0.655723	0.757612			6.57356	0.99696	0.974359	0.0226015		9.6428	0.990991	0.987421	0.00356961		9.19929	0.993994	0.981132	0.0128619		0.000177549	0.984802	0.980769	0.0040332
																				7.00788	0.993921	0.974359	0.019562		9.85749	0.987988	0.987421	0.000566604		9.45538	0.990991	0.981132	0.00985892		0.000211001	0.984802	0.974359	0.0104435
																				7.6186	0.990881	0.974359	0.0165225		10.0528	0.987988	0.981132	0.00685591		9.63843	0.990991	0.974843	0.0161482		0.000226668	0.984802	0.967949	0.0168537
																				7.87077	0.987842	0.974359	0.013483		10.3114	0.987988	0.974843	0.0131452		10.2108	0.990991	0.968553	0.0224375		0.00023364	0.984802	0.961538	0.023264
																				8.25708	0.984802	0.974359	0.0104435		10.9033	0.987988	0.968553	0.0194345		10.6786	0.987988	0.968553	0.0194345		0.000261918	0.984802	0.955128	0.0296742
																				9.72675	0.984802	0.967949	0.0168537		11.7218	0.984985	0.968553	0.0164315		10.7302	0.984985	0.968553	0.0164315		0.000293875	0.984802	0.948718	0.0360845
																				11.192	0.981763	0.967949	0.0138142		12.5027	0.984985	0.962264	0.0227208		10.8495	0.984985	0.962264	0.0227208		0.000313732	0.984802	0.942308	0.0424947
																				11.7175	0.978723	0.967949	0.0107747		13.2107	0.984985	0.955975	0.0290101		10.9692	0.984985	0.955975	0.0290101		0.000340306	0.984802	0.935897	0.048905
													0.636							13.4503	0.978723	0.961538	0.0171849		13.9184	0.981982	0.955975	0.0260071		11.5662	0.984985	0.949686	0.0352995		0.000371707	0.984802	0.929487	0.0553153
													0.651							15.0562	0.978723	0.955128	0.0235952		14.7775	0.981982	0.949686	0.0322964		12.1597	0.984985	0.943396	0.0415888		0.000393499	0.984802	0.923077	0.0617255
													0.905064							17.1002	0.978723	0.948718	0.0300055		15.7429	0.978979	0.949686	0.0292934		12.2566	0.984985	0.937107	0.0478781		0.000401745	0.984802	0.916667	0.0681358
													0.706667							19.2712	0.975684	0.948718	0.0269659		16.1792	0.978979	0.943396	0.0355828		12.355	0.984985	0.930818	0.0541674		0.00041776	0.984802	0.910256	0.074546
																				19.6673	0.975684	0.942308	0.0333762		16.7263	0.978979	0.937107	0.0418721		12.906	0.984985	0.924528	0.0604567		0.000432186	0.984802	0.903846	0.0809563
																				20.909	0.975684	0.935897	0.0397865		17.808	0.975976	0.937107	0.0388691		13.4813	0.984985	0.918239	0.066746		0.00043443	0.984802	0.897436	0.0873665
																				23.4212	0.975684	0.929487	0.0461967		19.0141	0.972973	0.937107	0.0358661		13.5523	0.984985	0.91195	0.0730353		0.000439542	0.984802	0.891026	0.0937768
																				25.3746	0.975684	0.923077	0.052607		19.8164	0.972973	0.930818	0.0421554		13.7226	0.981982	0.91195	0.0700323		0.000459135	0.984802	0.884615	0.100187
																				26.5941	0.975684	0.916667	0.0590172		20.0487	0.972973	0.924528	0.0484447		14.1014	0.981982	0.90566	0.0763216		0.000516154	0.984802	0.878205	0.106597
																				27.6374	0.975684	0.910256	0.0654275		20.8499	0.972973	0.918239	0.054734		14.6164	0.978979	0.90566	0.0733186		0.000574693	0.984802	0.871795	0.113008
																				28.0143	0.975684	0.903846	0.0718377		21.732	0.96997	0.918239	0.051731		15.8921	0.978979	0.899371	0.0796079		0.000611491	0.984802	0.865385	0.119418
				切点	敏感度	1 － 特异性	Youden index													28.118	0.975684	0.897436	0.078248		22.1397	0.966967	0.918239	0.048728		17.2071	0.975976	0.899371	0.0766049		0.000646818	0.984802	0.858974	0.125828
			eGFR	59.8987	0.787234	0.461538	0.325696	0.538462												29.1211	0.975684	0.891026	0.0846582		22.462	0.966967	0.91195	0.0550173		17.5538	0.975976	0.893082	0.0828942		0.000664481	0.984802	0.852564	0.132238
			HESC	58.9149	0.573574	0.333333	0.24024	0.666667												30.8713	0.975684	0.884615	0.0910685		22.6055	0.963964	0.91195	0.0520143		19.0975	0.975976	0.886792	0.0891835		0.000673928	0.984802	0.846154	0.138649
			FESC	58.664	0.732733	0.496855	0.235877	0.503145												31.6544	0.972644	0.884615	0.088029		22.7938	0.960961	0.91195	0.0490113		20.8829	0.972973	0.886792	0.0861805		0.000720112	0.984802	0.839744	0.145059
			acr倒数	30.03	0.878419	0.0769231	0.801496	0.923077												32.1816	0.972644	0.878205	0.0944392		23.0997	0.960961	0.90566	0.0553006		21.4074	0.96997	0.886792	0.0831775		0.000774604	0.984802	0.833333	0.151469
			eGFR	59.8987	0.787234	0.461538	0.325696	0.538462												33.4598	0.972644	0.871795	0.10085		23.7709	0.960961	0.899371	0.0615899		21.8444	0.96997	0.880503	0.0894668		0.000812705	0.984802	0.826923	0.157879
																				34.4703	0.972644	0.865385	0.10726		24.291	0.957958	0.899371	0.0585869		22.3845	0.96997	0.874214	0.0957561		0.000850993	0.984802	0.820513	0.16429
																				34.8997	0.969605	0.865385	0.10422		24.3297	0.957958	0.893082	0.0648762		22.7945	0.96997	0.867925	0.102045		0.000878684	0.984802	0.814103	0.1707
																				35.2032	0.969605	0.858974	0.110631		24.5974	0.957958	0.886792	0.0711655		23.2223	0.96997	0.861635	0.108335		0.000894754	0.984802	0.807692	0.17711
																				35.4099	0.969605	0.852564	0.117041		25.0438	0.957958	0.880503	0.0774548		23.7287	0.966967	0.861635	0.105332		0.000910735	0.984802	0.801282	0.18352
																				35.5127	0.966565	0.852564	0.114001		25.3032	0.957958	0.874214	0.0837441		24.5692	0.966967	0.855346	0.111621		0.000988169	0.984802	0.794872	0.189931
																				35.6335	0.966565	0.846154	0.120412		25.7634	0.957958	0.867925	0.0900334		25.2892	0.966967	0.849057	0.11791		0.00106943	0.984802	0.788462	0.196341
							曲线下的面积													35.8109	0.966565	0.839744	0.126822		26.4188	0.954955	0.867925	0.0870304		25.3778	0.966967	0.842767	0.1242		0.00113399	0.984802	0.782051	0.202751
							检验结果变量	面积	标准误a	渐进 Sig.b	渐近 95% 置信区间									36.1162	0.963526	0.839744	0.123782		26.8468	0.954955	0.861635	0.0933197		25.6012	0.966967	0.836478	0.130489		0.00118495	0.984802	0.775641	0.209161
											下限	上限								36.7908	0.963526	0.833333	0.130193		27.0384	0.954955	0.855346	0.099609		25.7625	0.966967	0.830189	0.136778		0.00120886	0.984802	0.769231	0.215572
							肾病风险	0.651196	0.0261892	7.35094e-08	0.599867	0.702526	58.5	0.537994	0.288462	0.249532				37.5236	0.963526	0.826923	0.136603		27.2366	0.954955	0.849057	0.105898		25.8475	0.966967	0.823899	0.143068		0.00126432	0.984802	0.762821	0.221982
							HESC	0.632862	0.0271317	2.2486e-06	0.579685	0.686039								38.3885	0.963526	0.820513	0.143013		27.4607	0.951952	0.849057	0.102895		26.118	0.966967	0.81761	0.149357		0.00137227	0.984802	0.75641	0.228392
							FESC	0.649891	0.0273963	9.50699e-08	0.596195	0.703587								38.9753	0.963526	0.814103	0.149423		27.612	0.948949	0.849057	0.0998923		26.3268	0.963964	0.81761	0.146354		0.00149843	0.984802	0.75	0.234802
							acr倒数	0.905064	0.0182151	3.89019e-47	0.869363	0.940765								39.0886	0.963526	0.807692	0.155834		27.7092	0.945946	0.849057	0.0968893		26.7406	0.960961	0.81761	0.143351		0.00158582	0.984802	0.74359	0.241213
							eGFR	0.706667	0.0259926	1.87993e-13	0.655723	0.757612								39.5425	0.963526	0.801282	0.162244		27.8462	0.942943	0.849057	0.0938863		27.9068	0.957958	0.81761	0.140348		0.00168595	0.984802	0.737179	0.247623
																				39.9099	0.963526	0.794872	0.168654		28.0593	0.942943	0.842767	0.100176		28.7501	0.957958	0.811321	0.146637		0.0017564	0.984802	0.730769	0.254033
		曲线的坐标																		40.1405	0.960486	0.794872	0.165615		28.1842	0.93994	0.842767	0.0971726		29.0483	0.957958	0.805031	0.152927		0.00177573	0.984802	0.724359	0.260443
		检验结果变量	如果大于或等于则为正a	敏感度	1 － 特异性															40.5895	0.960486	0.788462	0.172025		28.2967	0.936937	0.842767	0.0941696		29.3338	0.954955	0.805031	0.149924		0.00189496	0.984802	0.717949	0.266854
		肾病风险	272.038	0.00303951	0															41.0004	0.960486	0.782051	0.178435		28.5081	0.933934	0.842767	0.0911666		29.4223	0.954955	0.798742	0.156213		0.00204616	0.984802	0.711538	0.273264
																				41.2968	0.960486	0.775641	0.184845		28.6529	0.933934	0.836478	0.0974559		29.51	0.951952	0.798742	0.15321		0.00213784	0.984802	0.705128	0.279674
			15	1	1	0														41.5047	0.957447	0.775641	0.181806		28.6652	0.930931	0.836478	0.0944529		29.7702	0.951952	0.792453	0.159499		0.00220929	0.984802	0.698718	0.286084
			17.5	1	0.99359	0.00641026														41.7442	0.954407	0.775641	0.178766		28.8641	0.927928	0.836478	0.0914499		29.9985	0.948949	0.792453	0.156496		0.00224632	0.981763	0.698718	0.283045
			21	1	0.987179	0.0128205														42.4677	0.954407	0.769231	0.185177		29.0641	0.927928	0.830189	0.0977392		30.2696	0.945946	0.792453	0.153493		0.00239982	0.978723	0.698718	0.280005
			23.5	0.99696	0.987179	0.009781														43.0596	0.954407	0.762821	0.191587		29.1558	0.924925	0.830189	0.0947362		30.6066	0.942943	0.792453	0.15049		0.00267719	0.978723	0.692308	0.286416
			24.5	0.993921	0.987179	0.00674149														43.3671	0.954407	0.75641	0.197997		29.2544	0.924925	0.823899	0.101026		30.7505	0.93994	0.792453	0.147487		0.00281563	0.975684	0.692308	0.283376
			25.5	0.984802	0.987179	-0.00237706														43.7592	0.954407	0.75	0.204407		29.2917	0.921922	0.823899	0.0980226		30.8955	0.936937	0.792453	0.144484		0.00298831	0.972644	0.692308	0.280337
			26.5	0.981763	0.987179	-0.00541657														43.8749	0.954407	0.74359	0.210818		29.3678	0.918919	0.823899	0.0950195		31.3378	0.933934	0.792453	0.141481		0.00335728	0.972644	0.685897	0.286747
			27.5	0.981763	0.980769	0.000993687														44.2508	0.954407	0.737179	0.217228		29.8584	0.918919	0.81761	0.101309		31.6762	0.930931	0.792453	0.138478		0.00357111	0.972644	0.679487	0.293157
			28.5	0.981763	0.974359	0.00740394														44.7259	0.954407	0.730769	0.223638		30.3609	0.918919	0.811321	0.107598		31.8533	0.927928	0.792453	0.135475		0.00359358	0.972644	0.673077	0.299567
			29.5	0.978723	0.974359	0.00436443														44.891	0.951368	0.730769	0.220599		30.5367	0.918919	0.805031	0.113887		32.1464	0.927928	0.786164	0.141764		0.00361112	0.972644	0.666667	0.305978
			30.5	0.975684	0.974359	0.00132492														45.0513	0.951368	0.724359	0.227009		30.894	0.915916	0.805031	0.110884		32.7278	0.927928	0.779874	0.148054		0.00367211	0.972644	0.660256	0.312388
			31.5	0.969605	0.961538	0.0080664														45.2911	0.948328	0.724359	0.223969		31.216	0.915916	0.798742	0.117174		33.5193	0.927928	0.773585	0.154343		0.003835	0.972644	0.653846	0.318798
			32.5	0.963526	0.955128	0.00839763														45.5513	0.945289	0.724359	0.22093		31.5624	0.912913	0.798742	0.114171		33.8829	0.927928	0.767296	0.160632		0.00394914	0.972644	0.647436	0.325208
			33.5	0.960486	0.942308	0.0181786														45.797	0.945289	0.717949	0.22734		31.908	0.90991	0.798742	0.111168		33.9496	0.927928	0.761006	0.166922		0.00399873	0.972644	0.641026	0.331619
			34.5	0.960486	0.935897	0.0245889														45.9476	0.942249	0.717949	0.224301		31.9893	0.90991	0.792453	0.117457		34.1266	0.924925	0.761006	0.163919		0.00405426	0.972644	0.634615	0.338029
			35.5	0.957447	0.929487	0.0279596														46.019	0.942249	0.711538	0.230711		32.003	0.90991	0.786164	0.123746		34.2839	0.924925	0.754717	0.170208		0.00410926	0.969605	0.634615	0.334989
			36.5	0.951368	0.923077	0.0282909														46.2287	0.93921	0.711538	0.227671		32.2273	0.90991	0.779874	0.130036		34.3483	0.921922	0.754717	0.167205		0.00428583	0.969605	0.628205	0.3414
			37.5	0.942249	0.891026	0.0512236														46.4552	0.93921	0.705128	0.234082		32.6605	0.90991	0.773585	0.136325		34.4629	0.918919	0.754717	0.164202		0.00445591	0.969605	0.621795	0.34781
			38.5	0.93617	0.865385	0.0707856														46.5418	0.93921	0.698718	0.240492		33.0995	0.906907	0.773585	0.133322		34.6869	0.915916	0.754717	0.161199		0.00451958	0.969605	0.615385	0.35422
			39.5	0.924012	0.839744	0.0842686														46.5913	0.93921	0.692308	0.246902		33.5024	0.906907	0.767296	0.139611		34.9357	0.915916	0.748428	0.167488		0.00463882	0.969605	0.608974	0.360631
			40.5	0.914894	0.788462	0.126432														46.8191	0.93617	0.692308	0.243863		33.7998	0.903904	0.767296	0.136608		35.0814	0.912913	0.748428	0.164485		0.00474849	0.969605	0.602564	0.367041
			41.5	0.893617	0.762821	0.130797														47.1486	0.933131	0.692308	0.240823		33.9418	0.903904	0.761006	0.142898		35.7413	0.90991	0.748428	0.161482		0.00484328	0.969605	0.596154	0.373451
			42.5	0.87234	0.717949	0.154392														47.3235	0.933131	0.685897	0.247233		34.4463	0.900901	0.761006	0.139895		36.409	0.906907	0.748428	0.158479		0.00499718	0.969605	0.589744	0.379861
			43.5	0.857143	0.698718	0.158425														47.4531	0.930091	0.685897	0.244194		34.9993	0.897898	0.761006	0.136892		36.6365	0.903904	0.748428	0.155476		0.00517338	0.969605	0.583333	0.386272
			44.5	0.835866	0.666667	0.1692														47.7445	0.930091	0.679487	0.250604		35.0863	0.897898	0.754717	0.143181		37.1046	0.900901	0.748428	0.152473		0.00531175	0.969605	0.576923	0.392682
			45.5	0.826748	0.660256	0.166491														47.9812	0.924012	0.679487	0.244525		35.1965	0.894895	0.754717	0.140178		37.5176	0.900901	0.742138	0.158763		0.0053506	0.969605	0.570513	0.399092
			46.5	0.81155	0.634615	0.176935														48.0017	0.924012	0.673077	0.250935		35.3241	0.891892	0.754717	0.137175		37.8485	0.897898	0.742138	0.15576		0.00540693	0.966565	0.570513	0.396053
			47.5	0.796353	0.596154	0.200199														48.0659	0.920973	0.673077	0.247896		35.6309	0.888889	0.754717	0.134172		38.3123	0.897898	0.735849	0.162049		0.00562576	0.966565	0.564103	0.402463
			48.5	0.762918	0.589744	0.173174														48.2005	0.920973	0.666667	0.254306		35.9511	0.885886	0.754717	0.131169		39.0661	0.897898	0.72956	0.168338		0.00591571	0.966565	0.557692	0.408873
			49.5	0.74772	0.551282	0.196438														48.3718	0.920973	0.660256	0.260716		36.025	0.882883	0.754717	0.128166		39.7245	0.897898	0.72327	0.174627		0.00617169	0.966565	0.551282	0.415283
			50.5	0.726444	0.538462	0.187982														48.878	0.920973	0.653846	0.267126		36.0893	0.87988	0.754717	0.125163		39.8793	0.897898	0.716981	0.180917		0.00630557	0.966565	0.544872	0.421694
			51.5	0.705167	0.50641	0.198757														49.2949	0.920973	0.647436	0.273537		36.1475	0.876877	0.754717	0.12216		40.0948	0.894895	0.716981	0.177914		0.00637006	0.966565	0.538462	0.428104
			52.5	0.68997	0.5	0.18997														49.3241	0.920973	0.641026	0.279947		36.5835	0.876877	0.748428	0.128449		40.3516	0.891892	0.716981	0.174911		0.00655602	0.966565	0.532051	0.434514
			53.5	0.662614	0.467949	0.194665														49.4646	0.920973	0.634615	0.286357		37.0375	0.876877	0.742138	0.134739		40.5137	0.891892	0.710692	0.1812		0.00679453	0.966565	0.525641	0.440924
			54.5	0.644377	0.442308	0.202069														49.6226	0.920973	0.628205	0.292768		37.1652	0.876877	0.735849	0.141028		40.893	0.891892	0.704403	0.187489		0.00701315	0.966565	0.519231	0.447335
			55.5	0.617021	0.397436	0.219585														49.7715	0.917933	0.628205	0.289728		37.3015	0.873874	0.735849	0.138025		41.5287	0.888889	0.704403	0.184486		0.00714425	0.966565	0.512821	0.453745
			56.5	0.589666	0.358974	0.230691														50.1428	0.917933	0.621795	0.296138		37.3491	0.873874	0.72956	0.144314		41.9215	0.885886	0.704403	0.181483		0.00720135	0.966565	0.50641	0.460155
			57.5	0.556231	0.320513	0.235718														50.4342	0.914894	0.621795	0.293099		37.501	0.870871	0.72956	0.141311		41.9634	0.885886	0.698113	0.187773		0.00730947	0.966565	0.5	0.466565
			58.5	0.537994	0.288462	0.249532														50.5981	0.911854	0.621795	0.290059		38.0477	0.867868	0.72956	0.138308		42.089	0.882883	0.698113	0.18477		0.00749755	0.966565	0.49359	0.472976
			59.5	0.504559	0.262821	0.241739														50.7623	0.911854	0.615385	0.296469		38.5204	0.867868	0.72327	0.144597		42.2717	0.87988	0.698113	0.181767		0.00766953	0.963526	0.49359	0.469936
			60.5	0.477204	0.237179	0.240024														50.8525	0.908815	0.615385	0.29343		38.6514	0.867868	0.716981	0.150887		42.3784	0.87988	0.691824	0.188056		0.00774385	0.963526	0.487179	0.476346
			61.5	0.431611	0.224359	0.207252														50.9841	0.908815	0.608974	0.29984		38.7958	0.867868	0.710692	0.157176		42.5136	0.87988	0.685535	0.194345		0.00786949	0.963526	0.480769	0.482757
			62.5	0.407295	0.224359	0.182936														51.1968	0.908815	0.602564	0.30625		38.9434	0.864865	0.710692	0.154173		42.6122	0.876877	0.685535	0.191342		0.0080055	0.960486	0.480769	0.479717
			63.5	0.389058	0.211538	0.177519														51.353	0.905775	0.602564	0.303211		39.0061	0.861862	0.710692	0.15117		42.7581	0.876877	0.679245	0.197632		0.00817772	0.957447	0.480769	0.476678
			64.5	0.361702	0.192308	0.169394														51.3836	0.905775	0.596154	0.309621		39.156	0.858859	0.710692	0.148167		42.9796	0.873874	0.679245	0.194629		0.00836133	0.957447	0.474359	0.483088
			65.5	0.346505	0.179487	0.167017														51.4351	0.902736	0.596154	0.306582		39.4999	0.855856	0.710692	0.145164		43.0578	0.873874	0.672956	0.200918		0.00842614	0.957447	0.467949	0.489498
			66.5	0.328267	0.166667	0.161601														51.5635	0.899696	0.596154	0.303542		39.9046	0.852853	0.710692	0.142161		43.1293	0.873874	0.666667	0.207207		0.00847894	0.957447	0.461538	0.495908
			67.5	0.31003	0.147436	0.162594														51.895	0.896657	0.596154	0.300503		40.1314	0.84985	0.710692	0.139158		43.2252	0.873874	0.660377	0.213497		0.00850884	0.957447	0.455128	0.502319
			68.5	0.300912	0.134615	0.166296														52.1434	0.896657	0.589744	0.306913		40.153	0.84985	0.704403	0.145447		43.4629	0.873874	0.654088	0.219786		0.00861359	0.957447	0.448718	0.508729
			69.5	0.288754	0.128205	0.160549														52.2582	0.893617	0.589744	0.303873		40.3248	0.84985	0.698113	0.151737		43.8463	0.870871	0.654088	0.216783		0.00895277	0.957447	0.442308	0.515139
			70.5	0.264438	0.115385	0.149053														52.4009	0.890578	0.589744	0.300834		40.5912	0.846847	0.698113	0.148734		44.0911	0.870871	0.647799	0.223072		0.00936094	0.957447	0.435897	0.521549
			71.5	0.24924	0.108974	0.140266														52.579	0.890578	0.583333	0.307244		40.7131	0.843844	0.698113	0.145731		44.2078	0.867868	0.647799	0.220069		0.00967103	0.957447	0.429487	0.52796
			72.5	0.237082	0.102564	0.134518														52.7477	0.884498	0.583333	0.301165		40.8052	0.840841	0.698113	0.142728		44.3439	0.864865	0.647799	0.217066		0.00984454	0.957447	0.423077	0.53437
			73.5	0.221884	0.0961538	0.125731														52.8798	0.881459	0.583333	0.298126		40.9289	0.840841	0.691824	0.149017		44.522	0.864865	0.641509	0.223355		0.00989172	0.957447	0.416667	0.54078
			74.5	0.191489	0.0769231	0.114566														53.0231	0.878419	0.583333	0.295086		41.09	0.840841	0.685535	0.155306		44.7341	0.861862	0.641509	0.220352		0.0099554	0.957447	0.410256	0.54719
			75.5	0.179331	0.0576923	0.121639														53.1205	0.878419	0.576923	0.301496		41.2251	0.840841	0.679245	0.161596		44.9194	0.858859	0.641509	0.217349		0.0100413	0.93617	0.410256	0.525914
			76.5	0.164134	0.0512821	0.112852														53.1792	0.878419	0.570513	0.307907		41.3618	0.837838	0.679245	0.158593		45.0455	0.855856	0.641509	0.214346		0.0101949	0.93617	0.403846	0.532324
			77.5	0.151976	0.0384615	0.113514														53.2425	0.87538	0.570513	0.304867		41.4755	0.837838	0.672956	0.164882		45.5012	0.852853	0.641509	0.211343		0.0105012	0.93617	0.397436	0.538734
			78.5	0.136778	0.0384615	0.0983166														53.4377	0.87234	0.564103	0.308238		41.5032	0.834835	0.672956	0.161879		45.8977	0.84985	0.641509	0.20834		0.0108829	0.93617	0.391026	0.545145
			79.5	0.118541	0.0384615	0.0800795														53.6369	0.869301	0.564103	0.305198		41.5981	0.831832	0.672956	0.158876		45.9224	0.84985	0.63522	0.21463		0.0113573	0.93617	0.384615	0.551555
			80.5	0.115502	0.0384615	0.07704														53.7103	0.866261	0.564103	0.302159		41.6999	0.831832	0.666667	0.165165		46.0014	0.84985	0.628931	0.220919		0.0117681	0.933131	0.384615	0.548515
			81.5	0.109422	0.0320513	0.0773712														53.7563	0.863222	0.564103	0.299119		41.8211	0.828829	0.666667	0.162162		46.0813	0.846847	0.628931	0.217916		0.0119563	0.933131	0.378205	0.554926
			82.5	0.103343	0.0320513	0.0712922														53.818	0.860182	0.564103	0.29608		41.9598	0.825826	0.666667	0.159159		46.163	0.843844	0.628931	0.214913		0.0122207	0.933131	0.371795	0.561336
			83.5	0.100304	0.0192308	0.0810732														53.9202	0.857143	0.564103	0.29304		42.1427	0.822823	0.666667	0.156156		46.6189	0.840841	0.628931	0.21191		0.0127022	0.930091	0.371795	0.558296
			84.5	0.0942249	0.0192308	0.0749942														54.0184	0.857143	0.557692	0.299451		42.3667	0.822823	0.660377	0.162445		47.0904	0.837838	0.628931	0.208907		0.0130466	0.927052	0.371795	0.555257
			85.5	0.0881459	0.0128205	0.0753254														54.06	0.857143	0.551282	0.305861		42.5046	0.822823	0.654088	0.168735		47.2796	0.834835	0.628931	0.205904		0.0132268	0.927052	0.365385	0.561667
			86.5	0.0790274	0.0128205	0.0662068														54.0991	0.854103	0.551282	0.302821		42.5927	0.81982	0.654088	0.165732		47.5656	0.834835	0.622642	0.212193		0.0135045	0.927052	0.358974	0.568077
			87.5	0.0699088	0.0128205	0.0570883														54.1598	0.848024	0.551282	0.296742		42.6718	0.816817	0.654088	0.162729		47.7706	0.834835	0.616352	0.218483		0.0136978	0.927052	0.352564	0.574488
			88.5	0.0577508	0.0128205	0.0449302														54.3355	0.848024	0.544872	0.303153		42.7651	0.816817	0.647799	0.169018		47.8596	0.831832	0.616352	0.21548		0.0147269	0.927052	0.346154	0.580898
			89.5	0.0425532	0.0128205	0.0297327														54.5851	0.848024	0.538462	0.309563		43.2562	0.813814	0.647799	0.166015		47.9779	0.831832	0.610063	0.221769		0.0157543	0.927052	0.339744	0.587308
			90.5	0.0395137	0.0128205	0.0266932														54.8587	0.844985	0.538462	0.306523		43.7003	0.810811	0.647799	0.163012		48.2737	0.831832	0.603774	0.228058		0.0159533	0.927052	0.333333	0.593718
			91.5	0.0364742	0.0128205	0.0236537														55.1843	0.844985	0.532051	0.312934		43.7274	0.807808	0.647799	0.160009		48.5681	0.828829	0.603774	0.225055		0.0162829	0.927052	0.326923	0.600129
			92.5	0.0334347	0.0128205	0.0206141														55.5834	0.841945	0.532051	0.309894		43.9632	0.807808	0.641509	0.166298		48.8125	0.825826	0.603774	0.222052		0.0165321	0.927052	0.320513	0.606539
			93.5	0.0303951	0.00641026	0.0239849														55.8629	0.838906	0.532051	0.306854		44.1913	0.804805	0.641509	0.163295		49.1446	0.825826	0.597484	0.228342		0.0168583	0.927052	0.314103	0.612949
			96	0.0273556	0.00641026	0.0209454														55.9346	0.835866	0.532051	0.303815		44.2169	0.801802	0.641509	0.160292		49.3834	0.822823	0.597484	0.225339		0.0171175	0.927052	0.307692	0.619359
			98.5	0.0243161	0.00641026	0.0179059														56.0228	0.835866	0.525641	0.310225		44.2478	0.798799	0.641509	0.157289		49.4846	0.81982	0.597484	0.222336		0.0172813	0.927052	0.301282	0.62577
			99.5	0.0182371	0.00641026	0.0118268														56.2303	0.832827	0.525641	0.307186		44.275	0.795796	0.641509	0.154286		49.5013	0.816817	0.597484	0.219333		0.0174353	0.927052	0.294872	0.63218
			101	0.0151976	0.00641026	0.00878731														56.4069	0.829787	0.525641	0.304146		44.2995	0.792793	0.641509	0.151283		49.6366	0.816817	0.591195	0.225622		0.0175335	0.927052	0.288462	0.63859
			102.5	0.0121581	0.00641026	0.0057478														56.5561	0.829787	0.519231	0.310556		44.3212	0.78979	0.641509	0.14828		50.5227	0.813814	0.591195	0.222619		0.0176336	0.927052	0.282051	0.645
			103.5	0.0121581	0	0.0121581														56.679	0.826748	0.519231	0.307517		44.4661	0.786787	0.641509	0.145277		51.4805	0.813814	0.584906	0.228908		0.0176679	0.927052	0.275641	0.651411
			106.5	0.00911854	0	0.00911854														56.7206	0.823708	0.519231	0.304477		44.7031	0.783784	0.641509	0.142274		51.724	0.810811	0.584906	0.225905		0.0181024	0.927052	0.269231	0.657821
			109.5	0.00607903	0	0.00607903														56.8555	0.820669	0.519231	0.301438		44.8261	0.780781	0.641509	0.139271		51.9943	0.807808	0.584906	0.222902		0.0185929	0.927052	0.262821	0.664231
		HESC	121	0.00303951	0	0.00303951														57.0753	0.820669	0.512821	0.307848		44.9409	0.777778	0.641509	0.136268		52.2496	0.804805	0.584906	0.219899		0.0188212	0.927052	0.25641	0.670641
			133	0	0	0														57.2073	0.817629	0.512821	0.304809		45.0898	0.777778	0.63522	0.142558		52.6018	0.801802	0.584906	0.216896		0.0194242	0.927052	0.25	0.677052
			5.8388	1	1	0														57.2905	0.817629	0.50641	0.311219		45.1554	0.774775	0.63522	0.139555		52.9555	0.798799	0.584906	0.213893		0.0199384	0.927052	0.24359	0.683462
			7.84953	1	0.99359	0.00641026														57.4637	0.817629	0.5	0.317629		45.1635	0.771772	0.63522	0.136552		53.0692	0.795796	0.584906	0.21089		0.0201358	0.920973	0.24359	0.677383
			8.95247	1	0.987179	0.0128205														57.5696	0.817629	0.49359	0.324039		45.1961	0.771772	0.628931	0.142841		53.2326	0.792793	0.584906	0.207887		0.0202758	0.920973	0.237179	0.683793
			9.17996	0.99696	0.987179	0.009781														57.6148	0.81459	0.49359	0.321		45.3097	0.771772	0.622642	0.14913		53.4339	0.78979	0.584906	0.204884		0.0205914	0.920973	0.230769	0.690203
			9.46141	0.993921	0.987179	0.00674149														57.6593	0.81155	0.49359	0.31796		45.4142	0.768769	0.622642	0.146127		53.6758	0.78979	0.578616	0.211173		0.0209118	0.920973	0.224359	0.696614
			9.6428	0.990881	0.987179	0.00370197														57.6752	0.808511	0.49359	0.314921		45.4399	0.765766	0.622642	0.143124		53.8787	0.786787	0.578616	0.20817		0.0209336	0.920973	0.217949	0.703024
			9.85749	0.987842	0.987179	0.000662458														57.7195	0.805471	0.49359	0.311881		45.49	0.765766	0.616352	0.149414		54.0058	0.786787	0.572327	0.21446		0.0209666	0.920973	0.211538	0.709434
			10.0528	0.987842	0.980769	0.00707271														57.9776	0.802432	0.49359	0.308842		45.5907	0.762763	0.616352	0.146411		54.1702	0.783784	0.572327	0.211457		0.0211519	0.917933	0.211538	0.706395
			10.3114	0.987842	0.974359	0.013483														58.2331	0.802432	0.487179	0.315252		45.7389	0.762763	0.610063	0.1527		54.3461	0.780781	0.572327	0.208454		0.021322	0.914894	0.211538	0.703355
			10.9033	0.987842	0.967949	0.0198932														58.4317	0.802432	0.480769	0.321662		45.9985	0.762763	0.603774	0.158989		54.5748	0.780781	0.566038	0.214743		0.0214252	0.914894	0.205128	0.709765
			11.7218	0.984802	0.967949	0.0168537														58.6695	0.799392	0.480769	0.318623		46.1789	0.75976	0.603774	0.155986		54.8799	0.780781	0.559748	0.221032		0.0218558	0.914894	0.198718	0.716176
			12.8993	0.984802	0.961538	0.023264														58.8894	0.796353	0.480769	0.315583		46.2126	0.75976	0.597484	0.162275		55.0368	0.777778	0.559748	0.218029		0.0222248	0.911854	0.198718	0.713136
			13.9184	0.981763	0.961538	0.0202245														59.0672	0.793313	0.480769	0.312544		46.2687	0.75976	0.591195	0.168565		55.0612	0.777778	0.553459	0.224319		0.022523	0.911854	0.192308	0.719546
			14.7775	0.981763	0.955128	0.0266347														59.2634	0.790274	0.480769	0.309504		46.4097	0.75976	0.584906	0.174854		55.2148	0.774775	0.553459	0.221316		0.0229315	0.911854	0.185897	0.725957
			15.7429	0.978723	0.955128	0.0235952														59.4391	0.790274	0.474359	0.315915		46.5759	0.75976	0.578616	0.181143		55.4973	0.771772	0.553459	0.218313		0.0231134	0.908815	0.185897	0.722917
			16.1792	0.978723	0.948718	0.0300055														59.5267	0.787234	0.474359	0.312875		46.6812	0.756757	0.578616	0.17814		55.7185	0.768769	0.553459	0.21531		0.0231831	0.908815	0.179487	0.729327
			16.7263	0.978723	0.942308	0.0364157														59.7228	0.787234	0.467949	0.319285		46.789	0.756757	0.572327	0.18443		55.8783	0.765766	0.553459	0.212307		0.0232261	0.905775	0.179487	0.726288
			17.808	0.975684	0.942308	0.0333762														59.8987	0.787234	0.461538	0.325696		46.9443	0.753754	0.572327	0.181427		55.9499	0.765766	0.54717	0.218596		0.023313	0.905775	0.173077	0.732698
			19.0141	0.972644	0.942308	0.0303367														60.1314	0.784195	0.461538	0.322656		47.1171	0.753754	0.566038	0.187716		55.9564	0.762763	0.54717	0.215593		0.0237151	0.902736	0.173077	0.729659
			19.8164	0.972644	0.935897	0.0367469														60.4326	0.781155	0.461538	0.319617		47.3418	0.750751	0.566038	0.184713		55.976	0.75976	0.54717	0.21259		0.0241258	0.899696	0.173077	0.726619
			20.0487	0.972644	0.929487	0.0431572														60.5743	0.778116	0.461538	0.316577		47.5723	0.747748	0.566038	0.18171		56.0868	0.756757	0.54717	0.209587		0.0243584	0.899696	0.166667	0.733029
			20.8499	0.972644	0.923077	0.0495675														60.645	0.778116	0.455128	0.322987		48.0669	0.744745	0.566038	0.178707		56.1886	0.756757	0.540881	0.215876		0.0245793	0.899696	0.160256	0.73944
			21.732	0.969605	0.923077	0.0465279														60.7841	0.775076	0.455128	0.319948		48.5879	0.744745	0.559748	0.184996		56.3376	0.756757	0.534591	0.222166		0.0249473	0.899696	0.153846	0.74585
			22.1397	0.966565	0.923077	0.0434884														60.8897	0.772036	0.455128	0.316908		48.9783	0.741742	0.559748	0.181993		56.6895	0.753754	0.534591	0.219163		0.0254207	0.896657	0.153846	0.74281
			22.462	0.966565	0.916667	0.0498987														60.9535	0.768997	0.455128	0.313869		49.3695	0.738739	0.559748	0.17899		56.9325	0.750751	0.534591	0.21616		0.025771	0.896657	0.147436	0.749221
			22.6055	0.963526	0.916667	0.0468592														61.0395	0.765957	0.455128	0.310829		49.4871	0.735736	0.559748	0.175987		57.1396	0.747748	0.534591	0.213157		0.0263284	0.896657	0.141026	0.755631
			22.7938	0.960486	0.916667	0.0438197														61.1086	0.762918	0.455128	0.30779		49.506	0.732733	0.559748	0.172984		57.3449	0.744745	0.534591	0.210154		0.0268027	0.893617	0.141026	0.752591
			23.0997	0.960486	0.910256	0.0502299														61.1484	0.762918	0.448718	0.3142		49.6098	0.72973	0.559748	0.169981		57.4004	0.744745	0.528302	0.216443		0.0271094	0.893617	0.134615	0.759002
			23.7709	0.960486	0.903846	0.0566402														61.1733	0.759878	0.448718	0.31116		49.7323	0.72973	0.553459	0.176271		57.4865	0.744745	0.522013	0.222732		0.0275886	0.890578	0.134615	0.755962
			24.291	0.957447	0.903846	0.0536007														61.2202	0.756839	0.448718	0.308121		49.787	0.72973	0.54717	0.18256		57.6593	0.744745	0.515723	0.229021		0.0278668	0.887538	0.134615	0.752923
			24.3297	0.957447	0.897436	0.0600109														61.5515	0.753799	0.448718	0.305081		49.8105	0.72973	0.540881	0.188849		57.8707	0.741742	0.515723	0.226018		0.0278979	0.887538	0.128205	0.759333
			24.5974	0.957447	0.891026	0.0664212														61.8451	0.753799	0.442308	0.311492		49.8452	0.72973	0.534591	0.195139		58.0231	0.738739	0.515723	0.223015		0.0279525	0.887538	0.121795	0.765743
			25.0438	0.957447	0.884615	0.0728314														61.875	0.75076	0.442308	0.308452		49.9673	0.726727	0.534591	0.192136		58.1309	0.738739	0.509434	0.229305		0.0280427	0.887538	0.115385	0.772153
			25.3032	0.957447	0.878205	0.0792417														61.9053	0.74772	0.442308	0.305413		50.101	0.726727	0.528302	0.198425		58.2527	0.735736	0.509434	0.226302		0.0289082	0.884498	0.115385	0.769114
			25.7634	0.957447	0.871795	0.0856519														61.9186	0.744681	0.442308	0.302373		50.2065	0.723724	0.528302	0.195422		58.448	0.735736	0.503145	0.232591		0.0301351	0.884498	0.108974	0.775524
			26.4188	0.954407	0.871795	0.0826124														61.9313	0.741641	0.442308	0.299334		50.3598	0.723724	0.522013	0.201711		58.5904	0.735736	0.496855	0.23888		0.030567	0.884498	0.102564	0.781934
			26.8468	0.954407	0.865385	0.0890227														62.0207	0.741641	0.435897	0.305744		50.5007	0.720721	0.522013	0.198708		58.664	0.732733	0.496855	0.235877		0.0306751	0.884498	0.0961538	0.788345
			27.0384	0.954407	0.858974	0.0954329														62.1205	0.738602	0.435897	0.302704		50.6294	0.717718	0.522013	0.195705		58.7733	0.72973	0.496855	0.232874		0.0309175	0.884498	0.0897436	0.794755
			27.2366	0.954407	0.852564	0.101843														62.2095	0.735562	0.435897	0.299665		50.7549	0.714715	0.522013	0.192702		58.8388	0.726727	0.496855	0.229871		0.0315838	0.881459	0.0897436	0.791715
			27.4607	0.951368	0.852564	0.0988037														62.3256	0.735562	0.429487	0.306075		50.9709	0.711712	0.522013	0.189699		58.8588	0.723724	0.496855	0.226868		0.0325533	0.878419	0.0897436	0.788676
			27.612	0.948328	0.852564	0.0957642														62.4153	0.732523	0.429487	0.303036		51.1561	0.708709	0.522013	0.186696		58.9912	0.723724	0.490566	0.233158		0.0330908	0.878419	0.0833333	0.795086
			27.7092	0.945289	0.852564	0.0927247														62.5826	0.729483	0.429487	0.299996		51.177	0.708709	0.515723	0.192985		59.1517	0.720721	0.490566	0.230155		0.0332671	0.878419	0.0769231	0.801496
			27.8462	0.942249	0.852564	0.0896851														62.7146	0.729483	0.423077	0.306406		51.2646	0.705706	0.515723	0.189982		59.2135	0.717718	0.490566	0.227152		0.0335752	0.87538	0.0769231	0.798457
			28.0593	0.942249	0.846154	0.0960954														62.8428	0.726444	0.423077	0.303367		51.4223	0.702703	0.515723	0.186979		59.3243	0.717718	0.484277	0.233441		0.0339045	0.87234	0.0769231	0.795417
			28.1842	0.93921	0.846154	0.0930559														62.9966	0.723404	0.423077	0.300327		51.5041	0.6997	0.515723	0.183976		59.5106	0.714715	0.484277	0.230438		0.034031	0.869301	0.0769231	0.792378
			28.2967	0.93617	0.846154	0.0900164														63.0472	0.723404	0.416667	0.306738		51.557	0.6997	0.509434	0.190266		59.6995	0.711712	0.484277	0.227435		0.0340774	0.866261	0.0769231	0.789338
			28.5081	0.933131	0.846154	0.0869769														63.0703	0.720365	0.416667	0.303698		51.6787	0.6997	0.503145	0.196555		59.927	0.708709	0.484277	0.224432		0.034153	0.863222	0.0769231	0.786299
			28.6529	0.933131	0.839744	0.0933871														63.1449	0.717325	0.416667	0.300659		51.7619	0.696697	0.503145	0.193552		60.1618	0.705706	0.484277	0.221429		0.0344612	0.860182	0.0769231	0.783259
			28.6652	0.930091	0.839744	0.0903476														63.2316	0.714286	0.416667	0.297619		51.9192	0.693694	0.503145	0.190549		60.3092	0.702703	0.484277	0.218426		0.034911	0.857143	0.0769231	0.78022
			28.8641	0.927052	0.839744	0.0873081														63.3101	0.711246	0.416667	0.29458		52.2472	0.690691	0.503145	0.187546		60.4207	0.6997	0.484277	0.215423		0.0353185	0.854103	0.0769231	0.77718
			29.0641	0.927052	0.833333	0.0937183														63.3659	0.708207	0.416667	0.29154		52.6239	0.687688	0.503145	0.184543		60.4942	0.696697	0.484277	0.21242		0.0356126	0.851064	0.0769231	0.774141
			29.1558	0.924012	0.833333	0.0906788														63.3709	0.705167	0.416667	0.288501		52.8412	0.687688	0.496855	0.190832		60.5724	0.693694	0.484277	0.209417		0.036053	0.848024	0.0769231	0.771101
			29.2544	0.924012	0.826923	0.0970891														63.7441	0.702128	0.416667	0.285461		52.9914	0.684685	0.496855	0.187829		60.7058	0.690691	0.484277	0.206414		0.0365703	0.844985	0.0769231	0.768062
			29.2917	0.920973	0.826923	0.0940496														64.1706	0.702128	0.410256	0.291871		53.1282	0.684685	0.490566	0.194119		60.9824	0.687688	0.484277	0.203411		0.0377277	0.838906	0.0769231	0.761983
			29.3678	0.917933	0.826923	0.0910101														64.2668	0.702128	0.403846	0.298282		53.3098	0.684685	0.484277	0.200408		61.1946	0.687688	0.477987	0.2097		0.0391586	0.838906	0.0705128	0.768393
			29.8584	0.917933	0.820513	0.0974203														64.3124	0.699088	0.403846	0.295242		53.633	0.681682	0.484277	0.197405		61.3634	0.684685	0.477987	0.206697		0.0398586	0.835866	0.0705128	0.765353
			30.3609	0.917933	0.814103	0.103831														64.4461	0.696049	0.403846	0.292202		53.8171	0.678679	0.484277	0.194402		61.6549	0.681682	0.477987	0.203694		0.040348	0.832827	0.0705128	0.762314
			30.5367	0.917933	0.807692	0.110241														64.6092	0.696049	0.397436	0.298613		53.8587	0.675676	0.484277	0.191399		61.8304	0.678679	0.477987	0.200691		0.0408604	0.829787	0.0705128	0.759274
			30.894	0.914894	0.807692	0.107201														64.7477	0.693009	0.397436	0.295573		53.959	0.672673	0.484277	0.188396		61.9194	0.678679	0.471698	0.206981		0.0416195	0.826748	0.0705128	0.756235
			31.216	0.914894	0.801282	0.113612														64.8629	0.68997	0.397436	0.292534		54.0936	0.672673	0.477987	0.194685		61.9834	0.678679	0.465409	0.21327		0.0422303	0.823708	0.0705128	0.753195
			31.5624	0.911854	0.801282	0.110572														64.9726	0.68693	0.397436	0.289494		54.2653	0.672673	0.471698	0.200975		62.1585	0.675676	0.465409	0.210267		0.0424268	0.820669	0.0705128	0.750156
			31.908	0.908815	0.801282	0.107533														65.1051	0.683891	0.397436	0.286455		54.4836	0.672673	0.465409	0.207264		62.4682	0.672673	0.465409	0.207264		0.0428484	0.817629	0.0705128	0.747116
			31.9893	0.908815	0.794872	0.113943														65.1566	0.680851	0.397436	0.283415		54.5809	0.672673	0.459119	0.213553		62.6917	0.66967	0.465409	0.204261		0.0435757	0.81459	0.0705128	0.744077
			32.003	0.908815	0.788462	0.120353														65.2634	0.680851	0.391026	0.289825		54.5972	0.672673	0.45283	0.219842		62.7693	0.666667	0.465409	0.201258		0.0445627	0.81155	0.0705128	0.741037
			32.2273	0.908815	0.782051	0.126763														65.451	0.680851	0.384615	0.296236		54.683	0.66967	0.45283	0.216839		62.833	0.666667	0.459119	0.207547		0.0452694	0.808511	0.0705128	0.737998
			32.6605	0.908815	0.775641	0.133174														65.5561	0.680851	0.378205	0.302646		54.8005	0.666667	0.45283	0.213836		62.9238	0.666667	0.45283	0.213836		0.0455278	0.805471	0.0705128	0.734958
			33.0995	0.905775	0.775641	0.130134														65.5925	0.677812	0.378205	0.299606		54.8797	0.663664	0.45283	0.210833		62.9849	0.663664	0.45283	0.210833		0.0459464	0.802432	0.0705128	0.731919
			33.5024	0.905775	0.769231	0.136544														65.6317	0.674772	0.378205	0.296567		54.9364	0.660661	0.45283	0.20783		63.0286	0.663664	0.446541	0.217123		0.0462322	0.802432	0.0641026	0.738329
			33.7998	0.902736	0.769231	0.133505														65.6648	0.671733	0.378205	0.293527		55.0978	0.657658	0.45283	0.204827		63.0874	0.660661	0.446541	0.21412		0.046307	0.799392	0.0641026	0.73529
			33.9418	0.902736	0.762821	0.139915														65.7389	0.668693	0.378205	0.290488		55.2605	0.654655	0.45283	0.201824		63.1652	0.657658	0.446541	0.211117		0.0464906	0.796353	0.0641026	0.73225
			34.4463	0.899696	0.762821	0.136876														65.9845	0.665653	0.378205	0.287448		55.3282	0.651652	0.45283	0.198821		63.3287	0.657658	0.440252	0.217406		0.0468834	0.793313	0.0641026	0.729211
			34.9993	0.896657	0.762821	0.133836														66.2999	0.665653	0.371795	0.293859		55.405	0.651652	0.446541	0.205111		63.4732	0.654655	0.440252	0.214403		0.0471254	0.793313	0.0576923	0.735621
			35.0863	0.896657	0.75641	0.140246														66.4468	0.662614	0.371795	0.290819		55.543	0.651652	0.440252	0.2114		63.5163	0.654655	0.433962	0.220692		0.0471587	0.790274	0.0576923	0.732581
			35.1965	0.893617	0.75641	0.137207														66.537	0.659574	0.371795	0.28778		55.7045	0.648649	0.440252	0.208397		63.5826	0.651652	0.433962	0.217689		0.0474741	0.787234	0.0576923	0.729542
			35.3241	0.890578	0.75641	0.134167														66.6659	0.656535	0.371795	0.28474		55.768	0.648649	0.433962	0.214686		63.6631	0.648649	0.433962	0.214686		0.0478585	0.784195	0.0576923	0.726502
			35.6309	0.887538	0.75641	0.131128														66.8238	0.653495	0.371795	0.281701		55.7912	0.648649	0.427673	0.220976		63.7218	0.645646	0.433962	0.211683		0.0479616	0.781155	0.0576923	0.723463
			35.9511	0.884498	0.75641	0.128088														67.0066	0.650456	0.371795	0.278661		55.8756	0.645646	0.427673	0.217973		63.7776	0.642643	0.433962	0.20868		0.0479962	0.778116	0.0576923	0.720423
			36.025	0.881459	0.75641	0.125049														67.32	0.647416	0.371795	0.275622		55.9506	0.642643	0.427673	0.21497		64.0333	0.63964	0.433962	0.205677		0.0482875	0.775076	0.0576923	0.717384
			36.0893	0.878419	0.75641	0.122009														67.5494	0.644377	0.371795	0.272582		56.005	0.63964	0.427673	0.211967		64.2666	0.636637	0.433962	0.202674		0.0485909	0.772036	0.0576923	0.714344
			36.1475	0.87538	0.75641	0.11897														67.6258	0.641337	0.371795	0.269543		56.1712	0.636637	0.427673	0.208964		64.3415	0.633634	0.433962	0.199671		0.0486856	0.768997	0.0576923	0.711305
			36.5835	0.87538	0.75	0.12538														67.743	0.638298	0.371795	0.266503		56.3061	0.636637	0.421384	0.215253		64.4405	0.633634	0.427673	0.205961		0.0493036	0.765957	0.0576923	0.708265
			37.0375	0.87538	0.74359	0.13179														67.9008	0.638298	0.365385	0.272913		56.423	0.636637	0.415094	0.221542		64.5012	0.630631	0.427673	0.202958		0.0501015	0.762918	0.0576923	0.705226
			37.1652	0.87538	0.737179	0.1382														68.0316	0.638298	0.358974	0.279324		56.5969	0.636637	0.408805	0.227832		64.5498	0.627628	0.427673	0.199955		0.0504288	0.762918	0.0512821	0.711636
			37.3015	0.87234	0.737179	0.135161														68.1582	0.635258	0.358974	0.276284		56.6879	0.636637	0.402516	0.234121		64.7679	0.624625	0.427673	0.196952		0.0507758	0.759878	0.0512821	0.708596
			37.4989	0.87234	0.730769	0.141571														68.2767	0.632219	0.358974	0.273244		56.7416	0.633634	0.402516	0.231118		65.013	0.624625	0.421384	0.203241		0.0514434	0.756839	0.0512821	0.705557
			38.0477	0.869301	0.730769	0.138532														68.3831	0.629179	0.358974	0.270205		56.8033	0.630631	0.402516	0.228115		65.1161	0.621622	0.421384	0.200238		0.0522498	0.753799	0.0512821	0.702517
			38.5204	0.869301	0.724359	0.144942														68.4821	0.629179	0.352564	0.276615		56.8646	0.627628	0.402516	0.225112		65.1816	0.621622	0.415094	0.206527		0.0527149	0.75076	0.0512821	0.699478
			38.6514	0.869301	0.717949	0.151352														68.5446	0.62614	0.352564			56.9571	0.624625	0.402516	0.222109		65.2153	0.618619	0.415094	0.203524		0.0529386	0.74772	0.0512821	0.696438
			38.7958	0.869301	0.711538	0.157762														68.6108	0.6231	0.352564			57.0301	0.624625	0.396226	0.228398		65.3	0.615616	0.415094	0.200521		0.0532913	0.744681	0.0512821	0.693399
			38.9434	0.866261	0.711538	0.154723														68.6633	0.6231	0.346154			57.0557	0.624625	0.389937	0.234688		65.4696	0.615616	0.408805	0.206811		0.0535333	0.741641	0.0512821	0.690359
			39.0061	0.863222	0.711538	0.151683														68.7214	0.620061	0.346154			57.1419	0.624625	0.383648	0.240977		65.6921	0.612613	0.408805	0.203808		0.0536193	0.738602	0.0512821	0.68732
			39.156	0.860182	0.711538	0.148644														68.8076	0.620061	0.339744			57.277	0.621622	0.383648	0.237974		65.8195	0.60961	0.408805	0.200805		0.0536769	0.735562	0.0512821	0.68428
			39.4999	0.857143	0.711538	0.145604														68.8915	0.617021	0.333333			57.3428	0.618619	0.383648	0.234971		65.853	0.606607	0.408805	0.197802		0.0537346	0.732523	0.0512821	0.681241
			39.9046	0.854103	0.711538	0.142565														68.9861	0.617021	0.326923			57.4114	0.615616	0.383648	0.231968		66.0284	0.606607	0.402516	0.204091		0.053865	0.729483	0.0512821	0.678201
			40.1314	0.851064	0.711538	0.139525														69.0785	0.617021	0.320513			57.5433	0.612613	0.383648	0.228965		66.2983	0.603604	0.402516	0.201088		0.054261	0.726444	0.0512821	0.675162
			40.153	0.851064	0.705128	0.145936														69.1779	0.613982	0.320513			57.6425	0.60961	0.383648	0.225962		66.4256	0.600601	0.402516	0.198085		0.0549326	0.723404	0.0512821	0.672122
			40.3248	0.851064	0.698718	0.152346														69.4378	0.610942	0.320513			57.6666	0.60961	0.377358	0.232251		66.4649	0.600601	0.396226	0.204374		0.055808	0.720365	0.0512821
			40.5912	0.848024	0.698718	0.149306														69.78	0.607903	0.320513			57.7275	0.606607	0.377358	0.229248		66.549	0.600601	0.389937	0.210663		0.0564818	0.717325	0.0512821
			40.7131	0.844985	0.698718	0.146267														70.0623	0.604863	0.320513			57.7898	0.606607	0.371069	0.235537		66.6553	0.597598	0.389937	0.20766		0.0567055	0.714286	0.0512821
			40.8052	0.841945	0.698718	0.143227														70.219	0.601824	0.320513			57.8312	0.606607	0.36478	0.241827		66.7205	0.594595	0.389937	0.204657		0.0570466	0.711246	0.0512821
			40.9289	0.841945	0.692308	0.149638														70.2813	0.598784	0.320513			57.9578	0.603604	0.36478	0.238824		66.7838	0.594595	0.383648	0.210947		0.0575381	0.705167	0.0512821
			41.09	0.841945	0.685897	0.156048														70.5319	0.598784	0.314103			58.0874	0.600601	0.36478	0.235821		66.8484	0.591592	0.383648	0.207944		0.057955	0.702128	0.0512821
			41.2251	0.841945	0.679487	0.162458														70.7908	0.595745	0.314103			58.1678	0.597598	0.36478	0.232818		66.992	0.588589	0.383648	0.204941		0.0582923	0.699088	0.0512821
			41.3618	0.838906	0.679487	0.159419														70.8682	0.592705	0.314103			58.2292	0.594595	0.36478	0.229815		67.2384	0.585586	0.383648	0.201938		0.0584625	0.696049	0.0512821
			41.4755	0.838906	0.673077	0.165829														71.2814	0.592705	0.307692			58.2546	0.591592	0.36478	0.226812		67.3711	0.582583	0.383648	0.198935		0.0592149	0.693009	0.0512821
			41.5032	0.835866	0.673077	0.162789														71.6471	0.589666	0.307692			58.3196	0.588589	0.36478	0.223809		67.502	0.57958	0.383648	0.195932		0.0600061	0.68997	0.0512821
			41.5981	0.832827	0.673077	0.15975														71.6893	0.586626	0.307692			58.3878	0.588589	0.358491	0.230098		67.622	0.57958	0.377358	0.202221		0.0601867	0.68693	0.0512821
			41.6999	0.832827	0.666667	0.16616														71.7428	0.586626	0.301282			58.4521	0.585586	0.358491	0.227095		67.6565	0.576577	0.377358	0.199218		0.0604417	0.683891	0.0512821
			41.8211	0.829787	0.666667	0.163121														71.7962	0.583587	0.301282			58.5312	0.582583	0.358491	0.224092		67.7052	0.573574	0.377358	0.196215		0.0607908	0.680851	0.0512821
			41.9598	0.826748	0.666667	0.160081														71.9104	0.580547	0.301282			58.5745	0.582583	0.352201	0.230381		67.7419	0.573574	0.371069	0.202504		0.0610315	0.677812	0.0512821
			42.1427	0.823708	0.666667	0.157042														71.9944	0.577508	0.301282			58.601	0.57958	0.352201	0.227378		67.8016	0.570571	0.371069	0.199501		0.061561	0.674772	0.0512821
			42.3667	0.823708	0.660256	0.163452														72.001	0.574468	0.301282			58.6884	0.576577	0.352201	0.224375		67.8666	0.567568	0.371069	0.196498		0.0624441	0.671733	0.0512821
			42.5046	0.823708	0.653846	0.169862														72.0085	0.574468	0.294872			58.7956	0.576577	0.345912	0.230665		67.8903	0.564565	0.371069	0.193495		0.0631325	0.668693	0.0512821
			42.5927	0.820669	0.653846	0.166823														72.0192	0.571429	0.294872			58.8569	0.573574	0.345912	0.227662		67.959	0.564565	0.36478	0.199785		0.0635529	0.665653	0.0512821
			42.6718	0.817629	0.653846	0.163783														72.1351	0.571429	0.288462			58.9018	0.573574	0.339623	0.233951		68.1188	0.564565	0.358491	0.206074		0.0645696	0.659574	0.0512821
			42.7651	0.817629	0.647436	0.170193														72.3027	0.568389	0.288462			58.9149	0.573574	0.333333	0.24024		68.2524	0.564565	0.352201	0.212363		0.0657913	0.656535	0.0512821
			43.2562	0.81459	0.647436	0.167154														72.4497	0.56535	0.288462			59.0001	0.570571	0.333333	0.237237		68.299	0.561562	0.352201	0.20936		0.0665136	0.653495	0.0512821
			43.7003	0.81155	0.647436	0.164114														72.5555	0.56231	0.288462			59.14	0.567568	0.333333	0.234234		68.3302	0.558559	0.352201	0.206357		0.066912	0.650456	0.0512821
			43.7274	0.808511	0.647436	0.161075														72.6343	0.559271	0.288462			59.4027	0.564565	0.333333	0.231231		68.3908	0.555556	0.352201	0.203354		0.0673885	0.647416	0.0512821
			43.9632	0.808511	0.641026	0.167485														72.7937	0.559271	0.282051			59.6076	0.564565	0.327044	0.237521		68.5134	0.555556	0.345912	0.209644		0.0682149	0.644377	0.0512821
			44.1913	0.805471	0.641026	0.164445														73.0364	0.559271	0.275641			59.672	0.561562	0.327044	0.234518		68.6136	0.555556	0.339623	0.215933		0.0689917	0.641337	0.0512821
			44.2169	0.802432	0.641026	0.161406														73.2299	0.556231	0.275641			59.77	0.558559	0.327044	0.231515		68.7168	0.552553	0.339623	0.21293		0.07026	0.638298	0.0512821
			44.2478	0.799392	0.641026	0.158366														73.3104	0.553191	0.275641			59.8352	0.555556	0.327044	0.228512		68.8108	0.54955	0.339623	0.209927		0.0711491	0.635258	0.0512821
			44.275	0.796353	0.641026	0.155327														73.3473	0.553191	0.269231			59.9706	0.552553	0.327044	0.225509		68.8207	0.546547	0.339623	0.206924		0.0711997	0.632219	0.0512821
			44.2995	0.793313	0.641026	0.152287														73.3856	0.550152	0.269231			60.0779	0.54955	0.327044	0.222506		68.8859	0.546547	0.333333	0.213213		0.0715838	0.629179	0.0512821
			44.3212	0.790274	0.641026	0.149248														73.4285	0.550152	0.262821			60.3391	0.546547	0.327044	0.219503		68.9668	0.546547	0.327044	0.219503		0.0723613	0.62614	0.0512821
			44.4661	0.787234	0.641026	0.146208														73.444	0.547112	0.262821			60.6818	0.546547	0.320755	0.225792		69.0076	0.543544	0.327044	0.2165		0.0728598	0.6231	0.0512821
			44.7031	0.784195	0.641026	0.143169														73.4573	0.544073	0.262821			60.7916	0.543544	0.320755	0.222789		69.0345	0.540541	0.327044	0.213497		0.0729927	0.620061	0.0512821
			44.8261	0.781155	0.641026	0.140129														73.5407	0.541033	0.262821			60.8365	0.540541	0.320755	0.219786		69.0518	0.537538	0.327044	0.210494		0.0730995	0.617021	0.0512821
			44.9409	0.778116	0.641026	0.13709														73.6453	0.537994	0.262821			60.9108	0.537538	0.320755	0.216783		69.1225	0.534535	0.327044	0.207491		0.0748906	0.613982	0.0512821
			45.0898	0.778116	0.634615	0.1435														73.7084	0.534954	0.262821			60.9712	0.537538	0.314465	0.223072		69.2153	0.534535	0.320755	0.21378		0.076835	0.610942	0.0512821
			45.1554	0.775076	0.634615	0.140461														73.7618	0.531915	0.262821			60.9875	0.534535	0.314465	0.220069		69.2822	0.531532	0.320755	0.210777		0.077829	0.607903	0.0512821
			45.1635	0.772036	0.634615															73.7891	0.528875	0.262821			61.0134	0.531532	0.314465	0.217066		69.3369	0.531532	0.314465	0.217066		0.0789278	0.604863	0.0512821
			45.1961	0.772036	0.628205															73.8946	0.528875	0.25641			61.0922	0.528529	0.314465	0.214063		69.3836	0.528529	0.314465	0.214063		0.0794603	0.601824	0.0512821
			45.3097	0.772036	0.621795															74.0776	0.525836	0.25641			61.2204	0.525526	0.314465	0.21106		69.4249	0.525526	0.314465	0.21106		0.080261	0.598784	0.0512821
			45.4142	0.768997	0.621795															74.1701	0.522796	0.25641			61.2929	0.522523	0.314465	0.208057		69.5751	0.522523	0.314465	0.208057		0.0814713	0.595745	0.0512821
			45.4399	0.765957	0.621795															74.3176	0.519757	0.25641			61.3275	0.51952	0.314465	0.205054		69.7369	0.522523	0.308176	0.214346		0.0824074	0.592705	0.0512821
			45.49	0.765957	0.615385															74.4954	0.516717	0.25641			61.3995	0.51952	0.308176	0.211343		69.7852	0.522523	0.301887	0.220636		0.0829538	0.589666	0.0512821
			45.5907	0.762918	0.615385															74.5357	0.513678	0.25641			61.4537	0.516517	0.308176	0.20834		69.8449	0.522523	0.295597	0.226925		0.0834734	0.586626	0.0512821
			45.7389	0.762918	0.608974															74.5845	0.510638	0.25641			61.4669	0.513514	0.308176	0.205337		69.9431	0.51952	0.295597	0.223922		0.0845382	0.583587	0.0512821
			45.9985	0.762918	0.602564															74.6716	0.510638	0.25			61.5004	0.510511	0.308176	0.202334		70.0542	0.516517	0.295597	0.220919		0.0854703	0.580547	0.0512821
			46.1789	0.759878	0.602564															74.7353	0.507599	0.25			61.5595	0.507508	0.308176	0.199331		70.1701	0.513514	0.295597	0.217916		0.0859861	0.577508	0.0512821
			46.2126	0.759878	0.596154															74.7666	0.504559	0.25			61.6125	0.504505	0.308176	0.196328		70.2362	0.510511	0.295597	0.214913		0.0866562	0.574468	0.0512821
			46.2687	0.759878	0.589744															74.8139	0.50152	0.25			61.6614	0.501502	0.308176	0.193325		70.26	0.507508	0.295597	0.21191		0.087726	0.571429	0.0512821
			46.4097	0.759878	0.583333															74.9243	0.49848	0.25			61.7638	0.498498	0.308176	0.190322		70.3222	0.504505	0.295597	0.208907		0.0890507	0.568389	0.0512821
			46.5759	0.759878	0.576923															75.0104	0.49848	0.24359			61.8391	0.498498	0.301887	0.196612		70.3706	0.501502	0.295597	0.205904		0.0898074	0.56535	0.0512821
			46.6812	0.756839	0.576923															75.1798	0.495441	0.24359			61.875	0.495495	0.301887	0.193609		70.4315	0.498498	0.295597	0.202901		0.0907083	0.56231	0.0512821
			46.789	0.756839	0.570513															75.3642	0.492401	0.24359			61.9734	0.492492	0.301887	0.190606		70.4934	0.498498	0.289308	0.20919		0.0919146	0.559271	0.0512821
			46.9443	0.753799	0.570513															75.4437	0.489362	0.24359			62.0886	0.489489	0.301887	0.187603		70.5132	0.498498	0.283019	0.21548		0.0937845	0.556231	0.0512821
			47.1171	0.753799	0.564103															75.5825	0.489362	0.237179			62.1539	0.486486	0.301887	0.1846		70.5303	0.498498	0.27673	0.221769		0.0963067	0.553191	0.0512821
			47.3418	0.75076	0.564103															75.8455	0.486322	0.237179			62.3026	0.483483	0.301887	0.181597		70.535	0.498498	0.27044	0.228058		0.0977526	0.553191	0.0448718
			47.5723	0.74772	0.564103															76.0925	0.486322	0.230769			62.4669	0.483483	0.295597	0.187886		70.5579	0.495495	0.27044	0.225055		0.098672	0.550152	0.0448718
			48.1774	0.744681	0.564103															76.2149	0.486322	0.224359			62.5688	0.48048	0.295597	0.184883		70.585	0.492492	0.27044	0.222052		0.0995526	0.547112	0.0448718
			48.9783	0.741641	0.564103															76.3351	0.483283	0.224359			62.7741	0.48048	0.289308	0.191172		70.7323	0.489489	0.27044	0.219049		0.0999502	0.544073	0.0448718
			49.3695	0.738602	0.564103															76.4299	0.480243	0.224359			63.0134	0.48048	0.283019	0.197462		70.9374	0.486486	0.27044	0.216046		0.100352	0.541033	0.0448718
			49.4871	0.735562	0.564103															76.4797	0.477204	0.224359			63.227	0.477477	0.283019	0.194459		71.0135	0.483483	0.27044	0.213043		0.100705	0.537994	0.0448718
			49.506	0.732523	0.564103															76.6272	0.474164	0.224359			63.3516	0.474474	0.283019			71.2143	0.48048	0.27044	0.21004		0.101062	0.534954	0.0448718
			49.6098	0.729483	0.564103															77.0003	0.471125	0.224359			63.4349	0.474474	0.27673			71.4652	0.477477	0.27044	0.207037		0.101627	0.531915	0.0448718
			49.7323	0.729483	0.557692															77.3683	0.468085	0.224359			63.5077	0.474474	0.27044			71.529	0.477477	0.264151	0.213327		0.102198	0.528875	0.0448718
			49.787	0.729483	0.551282															77.4928	0.468085	0.217949			63.5892	0.471471	0.27044			71.5945	0.474474	0.264151	0.210324		0.102936	0.525836	0.0448718
			49.845	0.729483	0.544872															77.5466	0.468085	0.211538			63.7437	0.468468	0.27044			71.6702	0.471471	0.264151	0.207321		0.103735	0.522796	0.0448718
			49.9673	0.726444	0.544872															77.6306	0.465046	0.211538			63.8404	0.465465	0.27044			71.6948	0.468468	0.264151	0.204318		0.104221	0.519757	0.0448718
			50.101	0.726444	0.538462															77.669	0.465046	0.205128			63.8694	0.462462	0.27044			71.9029	0.465465	0.264151	0.201315		0.104879	0.516717	0.0448718
			50.2065	0.723404	0.538462															77.6887	0.465046	0.198718			63.9413	0.459459	0.27044			72.0975	0.462462	0.264151	0.198312		0.105541	0.513678	0.0448718
			50.3598	0.723404	0.532051															77.745	0.462006	0.198718			64.0316	0.456456	0.27044			72.1429	0.459459	0.264151	0.195309		0.106159	0.510638	0.0448718
			50.5007	0.720365	0.532051															77.8583	0.458967	0.198718			64.1038	0.453453	0.27044			72.1995	0.456456	0.264151	0.192306		0.107535	0.507599	0.0448718
			50.6294	0.717325	0.532051															77.9722	0.455927	0.198718			64.1817	0.45045	0.27044			72.2268	0.453453	0.264151	0.189303		0.108756	0.504559	0.0448718
			50.7549	0.714286	0.532051															78.0362	0.455927	0.192308			64.2197	0.447447	0.27044			72.2703	0.45045	0.264151	0.1863		0.109592	0.50152	0.0448718
			50.9709	0.711246	0.532051															78.1113	0.452888	0.192308			64.2626	0.444444	0.27044			72.3321	0.447447	0.264151	0.183297		0.110254	0.49848	0.0448718
			51.1561	0.708207	0.532051															78.2113	0.449848	0.192308			64.4069	0.441441	0.27044			72.3846	0.444444	0.264151	0.180294		0.110497	0.495441	0.0448718
			51.177	0.708207	0.525641															78.2779	0.446809	0.192308			64.5105	0.438438	0.27044			72.432	0.441441	0.264151	0.17729		0.110865	0.492401	0.0448718
			51.2646	0.705167	0.525641															78.6535	0.443769	0.192308			64.5944	0.435435	0.27044			72.5646	0.438438	0.264151	0.174287		0.113159	0.489362	0.0448718
			51.4223	0.702128	0.525641															79.0269	0.440729	0.192308			64.6817	0.432432	0.27044			72.6779	0.435435	0.264151	0.171284		0.11534	0.486322	0.0448718
			51.5041	0.699088	0.525641															79.3154	0.43769	0.192308			64.7731	0.429429	0.27044			72.7056	0.432432	0.264151	0.168281		0.116148	0.483283	0.0448718
			51.557	0.699088	0.519231															79.6288	0.43465	0.192308			64.8625	0.426426	0.27044			72.7307	0.432432	0.257862	0.174571		0.117028	0.480243	0.0448718
			51.6889	0.699088	0.512821															80.0668	0.431611	0.192308			64.9022	0.426426	0.264151			72.742	0.429429	0.257862	0.171568		0.117999	0.477204	0.0448718
			51.9192	0.696049	0.512821															80.5435	0.428571	0.192308			64.9945	0.423423	0.264151			72.7736	0.429429	0.251572	0.177857		0.118835	0.474164	0.0448718
			52.2472	0.693009	0.512821															80.6332	0.425532	0.192308			65.144	0.423423	0.257862			72.9371	0.429429	0.245283	0.184146		0.118977	0.471125	0.0448718
			52.6239	0.68997	0.512821															80.6721	0.422492	0.192308			65.247	0.42042	0.257862			73.0984	0.426426	0.245283	0.181143		0.119119	0.468085	0.0448718
			52.8412	0.68997	0.50641															80.9084	0.422492	0.185897			65.5143	0.417417	0.257862			73.1369	0.423423	0.245283	0.17814		0.119547	0.465046	0.0448718
			52.9914	0.68693	0.50641															81.3354	0.422492	0.179487			65.7856	0.414414	0.257862			73.1837	0.423423	0.238994	0.18443		0.120339	0.462006	0.0448718
			53.1282	0.68693	0.5															81.6375	0.422492	0.173077			65.8772	0.411411	0.257862			73.2308	0.42042	0.238994	0.181427		0.122115	0.458967	0.0448718
			53.3098	0.68693	0.49359															81.7257	0.419453	0.173077			66.1378	0.408408	0.257862			73.2868	0.417417	0.238994	0.178424		0.123917	0.455927	0.0448718
			53.633	0.683891	0.49359															81.8203	0.416413	0.173077			66.3902	0.405405	0.257862			73.3724	0.414414	0.238994	0.175421		0.125003	0.452888	0.0448718
			53.8171	0.680851	0.49359															81.9266	0.413374	0.173077			66.515	0.405405	0.251572			73.4442	0.414414	0.232704	0.18171		0.125866	0.446809	0.0448718
			53.8587	0.677812	0.49359															81.951	0.410334	0.173077			66.5717	0.405405	0.245283			73.4992	0.411411	0.232704	0.178707		0.126746	0.443769	0.0448718
			53.959	0.674772	0.49359															81.9794	0.407295	0.173077			66.6049	0.405405	0.238994			73.5439	0.408408	0.232704	0.175704		0.127962	0.43769	0.0448718
			54.0936	0.674772	0.487179															82.4129	0.404255	0.173077			66.681	0.405405	0.232704			73.6991	0.405405	0.232704	0.172701		0.128617	0.43465	0.0448718
			54.2653	0.674772	0.480769															82.8328	0.401216	0.173077			66.73	0.402402	0.232704			73.9428	0.402402	0.232704	0.169698		0.12937	0.431611	0.0448718
			54.4836	0.674772	0.474359															82.8468	0.401216	0.166667			66.7701	0.399399	0.232704			74.08	0.402402	0.226415	0.175987		0.130379	0.428571	0.0448718
			54.5809	0.674772	0.467949															82.9115	0.398176	0.166667			66.8109	0.396396	0.232704			74.1243	0.399399	0.226415	0.172984		0.13089	0.425532	0.0448718
			54.5972	0.674772	0.461538															83.0929	0.395137	0.166667			66.8194	0.396396	0.226415			74.1393	0.396396	0.226415	0.169981		0.131148	0.419453	0.0448718
			54.683	0.671733	0.461538															83.3258	0.392097	0.166667			66.8338	0.393393	0.226415			74.1751	0.393393	0.226415	0.166978		0.131493	0.416413	0.0448718
			54.8005	0.668693	0.461538															83.4472	0.389058	0.166667			66.85	0.39039	0.226415			74.2221	0.39039	0.226415	0.163975		0.133353	0.413374	0.0448718
			54.8797	0.665653	0.461538															83.5029	0.386018	0.166667			66.928	0.387387	0.226415			74.2848	0.387387	0.226415	0.160972		0.136728	0.407295	0.0448718
			54.9364	0.662614	0.461538															83.6232	0.386018	0.160256			67.0137	0.384384	0.226415			74.3637	0.387387	0.220126	0.167262		0.1386	0.404255	0.0448718
			55.0978	0.659574	0.461538															83.7286	0.382979	0.160256			67.0552	0.381381	0.226415			74.3935	0.387387	0.213836	0.173551		0.139278	0.401216	0.0448718
			55.2605	0.656535	0.461538															83.9676	0.382979	0.153846			67.1096	0.378378	0.226415			74.4048	0.384384	0.213836	0.170548		0.140353	0.398176	0.0448718
			55.3282	0.653495	0.461538															84.2249	0.379939	0.153846			67.1528	0.375375	0.226415			74.4504	0.381381	0.213836	0.167545		0.141044	0.395137	0.0448718
			55.405	0.653495	0.455128															84.2879	0.3769	0.153846			67.1931	0.372372	0.226415			74.6123	0.378378	0.213836	0.164542		0.141443	0.392097	0.0448718
			55.543	0.653495	0.448718															84.3321	0.37386	0.153846			67.2168	0.372372	0.220126			74.775	0.378378	0.207547	0.170831		0.141744	0.389058	0.0448718
			55.7045	0.650456	0.448718															84.4886	0.370821	0.153846			67.2271	0.369369	0.220126			74.8377	0.375375	0.207547	0.167828		0.142147	0.386018	0.0448718
			55.768	0.650456	0.442308															84.7533	0.367781	0.153846			67.2741	0.366366	0.220126			74.9477	0.372372	0.207547	0.164825		0.142756	0.382979	0.0448718
			55.7912	0.650456	0.435897															84.9089	0.364742	0.153846			67.3266	0.366366	0.213836			75.0353	0.369369	0.207547	0.161822		0.143164	0.379939	0.0448718
			55.8756	0.647416	0.435897															85.0248	0.364742	0.147436			67.5421	0.363363	0.213836			75.0427	0.366366	0.207547	0.158819		0.143679	0.3769	0.0448718
			55.9506	0.644377	0.435897															85.1313	0.361702	0.147436			67.8558	0.36036	0.213836			75.1787	0.366366	0.201258	0.165109		0.14451	0.37386	0.0448718
			56.005	0.641337	0.435897															85.2393	0.358663	0.147436			67.9986	0.357357	0.213836			75.3286	0.363363	0.201258			0.145033	0.370821	0.0448718
			56.1712	0.638298	0.435897															85.4196	0.355623	0.147436			68.0908	0.357357	0.207547			75.3728	0.36036	0.201258			0.145349	0.367781	0.0448718
			56.3061	0.638298	0.429487															85.5504	0.355623	0.141026			68.157	0.354354	0.207547			75.4211	0.357357	0.201258			0.14588	0.364742	0.0448718
			56.423	0.638298	0.423077															85.6034	0.352584	0.141026			68.1681	0.351351	0.207547			75.4556	0.357357	0.194969			0.146413	0.358663	0.0448718
			56.5969	0.638298	0.416667															85.8477	0.349544	0.141026			68.1931	0.348348	0.207547			75.5173	0.354354	0.194969			0.147829	0.355623	0.0448718
			56.6879	0.638298	0.410256															86.0921	0.346505	0.141026			68.2128	0.345345	0.207547			75.7427	0.351351	0.194969			0.149817	0.352584	0.0448718
			56.7416	0.635258	0.410256															86.1935	0.343465	0.141026			68.2788	0.345345	0.201258			75.979	0.348348	0.194969			0.15083	0.349544	0.0448718
			56.8033	0.632219	0.410256															86.3303	0.340426	0.141026			68.3952	0.342342	0.201258			76.0625	0.348348	0.188679			0.151632	0.346505	0.0448718
			56.8646	0.629179	0.410256															86.3801	0.340426	0.134615			68.4742	0.339339	0.201258			76.0894	0.345345	0.188679			0.152323	0.343465	0.0448718
			56.9571	0.62614	0.410256															86.4769	0.337386	0.134615			68.5452	0.336336	0.201258			76.1076	0.342342	0.188679			0.152907	0.340426	0.0448718
			57.0301	0.62614	0.403846															86.6351	0.334347	0.134615			68.6357	0.333333	0.201258			76.1994	0.339339	0.188679			0.154812	0.337386	0.0448718
			57.0557	0.62614	0.397436															86.7096	0.331307	0.134615			68.6928	0.33033	0.201258			76.3208	0.339339	0.18239			0.156618	0.334347	0.0448718
			57.1419	0.62614	0.391026															86.8384	0.328267	0.134615			68.7179	0.327327	0.201258			76.3928	0.336336	0.18239			0.157233	0.331307	0.0448718
			57.277	0.6231	0.391026															87.004	0.325228	0.134615			68.7919	0.324324	0.201258			76.5425	0.333333	0.18239			0.158231	0.328267	0.0448718
			57.3428	0.620061	0.391026															87.1187	0.322188	0.134615			68.8655	0.324324	0.194969			76.7326	0.33033	0.18239			0.159236	0.325228	0.0448718
			57.4114	0.617021	0.391026															87.2453	0.319149	0.134615			68.8913	0.321321	0.194969			76.8595	0.327327	0.18239			0.16052	0.319149	0.0448718
			57.5433	0.613982	0.391026															87.3395	0.316109	0.134615			68.9166	0.321321	0.188679			76.9582	0.324324	0.18239			0.161813	0.316109	0.0448718
			57.6425	0.610942	0.391026															87.4336	0.31307	0.134615			68.9408	0.318318	0.188679			77.1252	0.324324	0.176101			0.163274	0.31307	0.0448718
			57.6666	0.610942	0.384615															87.5151	0.31003	0.134615			69.0837	0.315315	0.188679			77.2589	0.321321	0.176101			0.164609	0.31003	0.0448718
			57.7275	0.607903	0.384615															87.627	0.306991	0.134615			69.4544	0.312312	0.188679			77.3216	0.321321	0.169811			0.164881	0.306991	0.0448718
			57.7898	0.607903	0.378205															87.7747	0.306991	0.128205			69.711	0.312312	0.18239			77.4235	0.318318	0.169811			0.165153	0.303951	0.0448718
			57.8312	0.607903	0.371795															87.878	0.303951	0.128205			69.8046	0.309309	0.18239			77.4677	0.315315	0.169811			0.165426	0.300912	0.0448718
			57.9578	0.604863	0.371795															87.9929	0.300912	0.128205			69.8951	0.306306	0.18239			77.5199	0.312312	0.169811			0.166393	0.297872	0.0448718
			58.0874	0.601824	0.371795															88.141	0.297872	0.128205			69.9621	0.303303	0.18239			77.5766	0.309309	0.169811			0.167364	0.294833	0.0448718
			58.1678	0.598784	0.371795															88.2339	0.294833	0.128205			70.0256	0.3003	0.18239			77.6452	0.306306	0.169811			0.167645	0.291793	0.0448718
			58.2292	0.595745	0.371795															88.5067	0.291793	0.128205			70.05	0.3003	0.176101			77.7631	0.303303	0.169811			0.167926	0.288754	0.0448718
			58.2546	0.592705	0.371795															88.8297	0.291793	0.121795			70.0943	0.297297	0.176101			77.819	0.3003	0.169811			0.168636	0.282675	0.0448718
			58.3196	0.589666	0.371795															88.9144	0.288754	0.121795			70.1503	0.294294	0.176101			77.8532	0.3003	0.163522			0.170958	0.279635	0.0448718
			58.3878	0.589666	0.365385															89.0264	0.285714	0.121795			70.1857	0.294294	0.169811			77.8913	0.297297	0.163522			0.173161	0.276596	0.0448718
			58.4521	0.586626	0.365385															89.1375	0.282675	0.121795			70.2549	0.294294	0.163522			77.899	0.294294	0.163522			0.173914	0.273556	0.0448718
			58.5312	0.583587	0.365385															89.3465	0.279635	0.121795			70.3677	0.294294	0.157233			77.9226	0.294294	0.157233			0.174827	0.270517	0.0448718
			58.5745	0.583587	0.358974															89.592	0.276596	0.121795			70.4412	0.291291	0.157233			77.963	0.294294	0.150943			0.176372	0.267477	0.0448718
			58.601	0.580547	0.358974															89.7209	0.273556	0.121795			70.5531	0.288288	0.157233			78.0765	0.294294	0.144654			0.17762	0.261398	0.0448718
			58.6884	0.577508	0.358974															89.8581	0.270517	0.121795			70.6726	0.285285	0.157233			78.2782	0.294294	0.138365			0.178254	0.258359	0.0448718
			58.7956	0.577508	0.352564															89.9597	0.270517	0.115385			70.705	0.285285	0.150943			78.5855	0.291291	0.138365			0.179052	0.255319	0.0448718
			58.8569	0.574468	0.352564															90.076	0.267477	0.115385			70.7288	0.282282	0.150943			78.7917	0.288288	0.138365			0.180183	0.25228	0.0448718
			58.9018	0.574468	0.346154															90.2164	0.267477	0.108974			70.8203	0.279279	0.150943			78.8349	0.285285	0.138365			0.181325	0.24924	0.0448718
			58.9149	0.574468	0.339744															90.4069	0.267477	0.102564			70.9537	0.276276	0.150943			78.8792	0.285285	0.132075			0.184019	0.246201	0.0448718
			59.0001	0.571429	0.339744															90.5884	0.267477	0.0961538			71.0251	0.273273	0.150943			78.9697	0.282282	0.132075			0.186918	0.243161	0.0448718
			59.14	0.568389	0.339744															90.8036	0.264438	0.0961538			71.0929	0.27027	0.150943			79.0611	0.279279	0.132075			0.188148	0.240122	0.0448718
			59.4027	0.56535	0.339744															91.124	0.261398	0.0961538			71.1908	0.267267	0.150943			79.0809	0.276276	0.132075			0.189216	0.237082	0.0448718
			59.6076	0.56535	0.333333															91.4746	0.258359	0.0961538			71.2917	0.264264	0.150943			79.0946	0.273273	0.132075			0.190297	0.234043	0.0448718
			59.672	0.56231	0.333333															91.7813	0.255319	0.0961538			71.4544	0.261261	0.150943			79.1478	0.273273	0.125786			0.191389	0.231003	0.0448718
			59.77	0.559271	0.333333															92.0765	0.25228	0.0961538			71.5853	0.258258	0.150943			79.2226	0.27027	0.125786			0.192123	0.227964	0.0448718
			59.8352	0.556231	0.333333															92.2601	0.246201	0.0961538			71.6185	0.255255	0.150943			79.2736	0.267267	0.125786			0.192493	0.224924	0.0448718
			59.9706	0.553191	0.333333															92.3941	0.243161	0.0961538			71.6266	0.252252	0.150943			79.3091	0.264264	0.125786			0.192864	0.221884	0.0448718
			60.0779	0.550152	0.333333															92.5217	0.240122	0.0961538			71.6491	0.249249	0.150943			79.3242	0.261261	0.125786			0.193612	0.218845	0.0448718
			60.3391	0.547112	0.333333															92.6968	0.237082	0.0961538			71.7671	0.246246	0.150943			79.332	0.258258	0.125786			0.194364	0.215805	0.0448718
			60.6818	0.547112	0.326923															92.9849	0.234043	0.0961538			71.9743	0.243243	0.150943			79.3381	0.255255	0.125786			0.195124	0.212766	0.0448718
			60.7916	0.544073	0.326923															93.2271	0.231003	0.0961538			72.1052	0.24024	0.150943			79.3515	0.252252	0.125786			0.196857	0.209726	0.0448718
			60.8365	0.541033	0.326923															93.6569	0.227964	0.0961538			72.131	0.237237	0.150943			79.3754	0.249249	0.125786			0.198611	0.206687	0.0448718
			60.9108	0.537994	0.326923															94.4351	0.224924	0.0961538			72.1345	0.234234	0.150943			79.4068	0.249249	0.119497			0.199402	0.203647	0.0448718
			60.9712	0.537994	0.320513															95.092	0.224924	0.0897436			72.1501	0.231231	0.150943			79.4334	0.246246	0.119497			0.1998	0.197568	0.0448718
			60.9875	0.534954	0.320513															95.3159	0.221884	0.0897436			72.248	0.228228	0.150943			79.4948	0.243243	0.119497			0.20101	0.194529	0.0448718
			61.0134	0.531915	0.320513															95.3885	0.218845	0.0897436			72.3396	0.225225	0.150943			79.5516	0.24024	0.119497			0.202636	0.191489	0.0448718
			61.0922	0.528875	0.320513															95.5053	0.215805	0.0897436			72.3497	0.225225	0.144654			79.624	0.237237	0.119497			0.203459	0.18845	0.0448718
			61.2204	0.525836	0.320513															95.9502	0.212766	0.0897436			72.3639	0.222222	0.144654			79.6978	0.234234	0.119497			0.204714	0.18541	0.0448718
			61.2929	0.522796	0.320513															96.4409	0.209726	0.0897436			72.5549	0.219219	0.144654			79.7662	0.231231	0.119497			0.206186	0.182371	0.0448718
			61.3275	0.519757	0.320513															96.6856	0.206687	0.0897436			72.7416	0.219219	0.138365			79.8765	0.228228	0.119497			0.206825	0.179331	0.0448718
			61.3995	0.519757	0.314103															96.8602	0.203647	0.0897436			72.7515	0.219219	0.132075			79.9634	0.225225	0.119497			0.20747	0.176292	0.0448718
			61.4537	0.516717	0.314103															97.2074	0.203647	0.0833333			72.7587	0.219219	0.125786			80.0263	0.222222	0.119497			0.208117	0.173252	0.0448718
			61.4669	0.513678	0.314103															97.7585	0.200608	0.0833333			72.8438	0.216216	0.125786			80.1182	0.219219	0.119497			0.208551	0.170213	0.0448718
			61.5004	0.510638	0.314103															98.2	0.197568	0.0833333			72.9614	0.213213	0.125786			80.2003	0.216216	0.119497			0.210316	0.167173	0.0448718
			61.5595	0.507599	0.314103															98.3884	0.197568	0.0769231			73.0297	0.213213	0.119497			80.2859	0.213213	0.119497			0.213459	0.164134	0.0448718
			61.6125	0.504559	0.314103															98.67	0.194529	0.0769231			73.133	0.213213	0.113208			80.3764	0.21021	0.119497			0.217659	0.161094	0.0448718
			61.6614	0.50152	0.314103															99.093	0.194529	0.0705128			73.2588	0.213213	0.106918			80.4065	0.207207	0.119497			0.221739	0.158055	0.0448718
			61.7638	0.49848	0.314103															99.4124	0.191489	0.0705128			73.3496	0.21021	0.106918			80.4576	0.204204	0.119497			0.223715	0.155015	0.0448718
			61.8391	0.49848	0.307692															99.6696	0.18845	0.0705128			73.4344	0.207207	0.106918			80.5124	0.201201	0.119497			0.224974	0.151976	0.0448718
			61.875	0.495441	0.307692															99.9109	0.18541	0.0705128			73.5247	0.204204	0.106918			80.5252	0.198198	0.119497			0.226246	0.148936	0.0448718
			61.9734	0.492401	0.307692															100.231	0.182371	0.0705128			73.5754	0.204204	0.100629			80.5691	0.195195	0.119497			0.229388	0.145897	0.0448718
			62.0886	0.489362	0.307692															100.44	0.179331	0.0705128			73.6342	0.201201	0.100629			80.6453	0.192192	0.119497			0.232288	0.142857	0.0448718
			62.1539	0.486322	0.307692															100.486	0.176292	0.0705128			73.6906	0.198198	0.100629			80.6831	0.192192	0.113208			0.232829	0.136778	0.0448718
			62.3026	0.483283	0.307692															100.984	0.173252	0.0705128			73.834	0.195195	0.100629			80.6998	0.192192	0.106918			0.233646	0.133739	0.0448718
			62.4669	0.483283	0.301282															101.866	0.173252	0.0641026			74.0341	0.192192	0.100629			80.7133	0.189189	0.106918			0.235861	0.130699	0.0448718
			62.5688	0.480243	0.301282															102.296	0.170213	0.0641026			74.116	0.192192	0.0943396			80.7198	0.186186	0.106918			0.238669	0.12766	0.0448718
			62.7741	0.480243	0.294872															102.373	0.167173	0.0641026			74.1975	0.189189	0.0943396			80.7501	0.183183	0.106918			0.240096	0.12462	0.0448718
			63.0134	0.480243	0.288462															102.577	0.164134	0.0641026			74.4361	0.186186	0.0943396			80.7771	0.18018	0.106918			0.242741	0.118541	0.0448718
			63.227	0.477204	0.288462															102.84	0.164134	0.0576923			74.6194	0.183183	0.0943396			80.8048	0.177177	0.106918			0.245399	0.115502	0.0448718
			63.3516	0.474164	0.288462															102.989	0.161094	0.0576923			74.6316	0.18018	0.0943396			80.8998	0.174174	0.106918			0.246307	0.112462	0.0448718
			63.4349	0.474164	0.282051															103.261	0.161094	0.0512821			74.7219	0.177177	0.0943396			81.0465	0.171171	0.106918			0.248145	0.109422	0.0448718
			63.5077	0.474164	0.275641															103.491	0.161094	0.0448718			74.8904	0.174174	0.0943396			81.1548	0.168168	0.106918			0.250002	0.106383	0.0448718
			63.5892	0.471125	0.275641															103.507	0.158055	0.0448718			75.073	0.174174	0.0880503			81.198	0.168168	0.100629			0.25254	0.103343	0.0448718
			63.7437	0.468085	0.275641															103.78	0.155015	0.0448718			75.2297	0.171171	0.0880503			81.2619	0.165165	0.100629			0.255432	0.0972644	0.0448718
			63.8404	0.465046	0.275641															104.302	0.151976	0.0448718			75.4092	0.171171	0.081761			81.3605	0.165165	0.0943396			0.257739	0.0942249	0.0448718
			63.8694	0.462006	0.275641															104.746	0.148936	0.0448718			75.5334	0.168168	0.081761			81.443	0.165165	0.0880503			0.259404	0.0911854	0.0448718
			63.9413	0.458967	0.275641															104.961	0.145897	0.0448718			75.5486	0.165165	0.081761			81.519	0.165165	0.081761			0.264641	0.0881459	0.0448718
			64.0316	0.455927	0.275641															104.996	0.142857	0.0448718			75.5889	0.162162	0.081761			81.6294	0.165165	0.0754717			0.271011	0.0851064	0.0448718
			64.1038	0.452888	0.275641															105.049	0.139818	0.0448718			75.6511	0.159159	0.081761			81.706	0.162162	0.0754717			0.273226	0.0820669	0.0448718
			64.1817	0.449848	0.275641															105.141	0.136778	0.0448718			75.7568	0.156156	0.081761			81.7266	0.159159	0.0754717			0.274349	0.0790274	0.0448718
			64.2197	0.446809	0.275641															105.419	0.136778	0.0384615			75.9016	0.156156	0.0754717			81.7433	0.156156	0.0754717			0.275104	0.0759878	0.0448718
			64.2626	0.443769	0.275641															105.696	0.133739	0.0384615			76.0567	0.153153	0.0754717			81.8352	0.153153	0.0754717			0.281419	0.0729483	0.0448718
			64.4069	0.440729	0.275641															105.75	0.130699	0.0384615			76.1695	0.15015	0.0754717			81.9622	0.15015	0.0754717			0.289027	0.0699088	0.0448718
			64.5105	0.43769	0.275641															106.809	0.12766	0.0384615			76.2262	0.147147	0.0754717			82.0042	0.15015	0.0691824			0.291976	0.0668693	0.0448718
			64.5944	0.43465	0.275641															108.33	0.12462	0.0384615			76.2771	0.144144	0.0754717			82.126	0.147147	0.0691824			0.294557	0.0607903	0.0448718
			64.6817	0.431611	0.275641															108.864	0.121581	0.0384615			76.4413	0.141141	0.0754717			82.3733	0.144144	0.0691824			0.298079	0.0577508	0.0448718
			64.7731	0.428571	0.275641															109.059	0.118541	0.0384615			76.6059	0.138138	0.0754717			82.5184	0.141141	0.0691824			0.304949	0.0547112	0.0448718
			64.8625	0.425532	0.275641															109.322	0.115502	0.0384615			76.6666	0.135135	0.0754717			82.5935	0.138138	0.0691824			0.311539	0.0516717	0.0448718
			64.9022	0.425532	0.269231															109.501	0.112462	0.0384615			76.7183	0.132132	0.0754717			82.6546	0.135135	0.0691824			0.314968	0.0486322	0.0448718
			64.9945	0.422492	0.269231															109.571	0.109422	0.0384615			76.7787	0.129129	0.0754717			82.661	0.132132	0.0691824			0.318484	0.0455927	0.0448718
			65.144	0.422492	0.262821															110.148	0.106383	0.0384615			76.9284	0.129129	0.0691824			82.7093	0.129129	0.0691824			0.321028	0.0425532	0.0448718
			65.247	0.419453	0.262821															110.784	0.103343	0.0384615			77.1162	0.126126	0.0691824			82.756	0.126126	0.0691824			0.326335	0.0395137	0.0448718
			65.5143	0.416413	0.262821															110.893	0.100304	0.0384615			77.3062	0.123123	0.0691824			82.8666	0.123123	0.0691824			0.342868	0.0364742	0.0448718
			65.7856	0.413374	0.262821															111.096	0.0972644	0.0384615			77.4507	0.12012	0.0691824			82.9764	0.12012	0.0691824			0.355241	0.0334347	0.0448718
			65.8772	0.410334	0.262821															111.47	0.0942249	0.0384615			77.5253	0.117117	0.0691824			82.983	0.117117	0.0691824			0.357147	0.0303951	0.0448718
			66.1378	0.407295	0.262821															112.343	0.0911854	0.0384615			77.7	0.117117	0.0628931			82.9936	0.114114	0.0691824			0.359211	0.0243161	0.0448718
			66.3902	0.404255	0.262821															113.149	0.0881459	0.0384615			77.8636	0.114114	0.0628931			83.0204	0.111111	0.0691824			0.361818	0.0243161	0.025641
			66.515	0.404255	0.25641															114.194	0.0851064	0.0384615			78.0667	0.114114	0.0566038			83.0584	0.108108	0.0691824			0.364968	0.0212766	0.025641
			66.5717	0.404255	0.25															115.307	0.0820669	0.0384615			78.2846	0.111111	0.0566038			83.1169	0.105105	0.0691824			0.370416	0.0182371	0.025641
			66.6049	0.404255	0.24359															115.721	0.0790274	0.0384615			78.3803	0.108108	0.0566038			83.1891	0.102102	0.0691824			0.380316	0.0151976	0.025641
			66.681	0.404255	0.237179															116.584	0.0759878	0.0384615			78.4386	0.108108	0.0503145			83.2878	0.0990991	0.0691824			0.392253	0.0121581	0.025641
			66.7665	0.401216	0.237179															117.852	0.0729483	0.0384615			78.5613	0.105105	0.0503145			83.3598	0.0960961	0.0691824			0.399203	0.00911854	0.025641
			66.8109	0.398176	0.237179															119.183	0.0699088	0.0384615			78.7462	0.105105	0.0440252			83.4454	0.0930931	0.0691824			0.42	0.00607903	0.0192308
			66.8194	0.398176	0.230769															120.009	0.0668693	0.0384615			78.8457	0.102102	0.0440252			83.5962	0.0900901	0.0691824			0.451481	0.00607903	0
			66.8338	0.395137	0.230769															120.797	0.0638298	0.0384615			78.9436	0.0990991	0.0440252			83.6771	0.0870871	0.0691824		HESC	0.54204	0.00303951	0
			66.85	0.392097	0.230769															122.802	0.0607903	0.0384615			79.0667	0.0960961	0.0440252			83.7831	0.0840841	0.0691824			1.62112	0	0
			66.928	0.389058	0.230769															125.345	0.0577508	0.0384615			79.2253	0.0930931	0.0440252			83.931	0.0840841	0.0628931			5.8388	1	1
			67.0137	0.386018	0.230769															127.432	0.0547112	0.0384615			79.3395	0.0900901	0.0440252			84.0215	0.0840841	0.0566038			7.84953	1	0.99359
			67.0552	0.382979	0.230769															128.728	0.0547112	0.0320513			79.3705	0.0900901	0.0377358			84.1273	0.0810811	0.0566038			8.95247	1	0.987179
			67.1096	0.379939	0.230769															129.434	0.0516717	0.0320513			79.3977	0.0870871	0.0377358			84.2021	0.0780781	0.0566038			9.17996	0.99696	0.987179
			67.1528	0.3769	0.230769															130.382	0.0486322	0.0320513			79.4135	0.0840841	0.0377358			84.2131	0.0750751	0.0566038			9.46141	0.993921	0.987179
			67.1931	0.37386	0.230769															131.682	0.0455927	0.0320513			79.4786	0.0840841	0.0314465			84.2455	0.0720721	0.0566038			9.6428	0.990881	0.987179
			67.2168	0.37386	0.224359															132.454	0.0425532	0.0320513			79.6098	0.0840841	0.0251572			84.3286	0.0690691	0.0566038			9.85749	0.987842	0.987179
			67.2271	0.370821	0.224359															133.062	0.0395137	0.0320513			79.6907	0.0840841	0.0188679			84.4607	0.0660661	0.0566038			10.0528	0.987842	0.980769
			67.2741	0.367781	0.224359															133.585	0.0364742	0.0320513			79.8171	0.0810811	0.0188679			84.5707	0.0630631	0.0566038			10.3114	0.987842	0.974359
			67.3266	0.367781	0.217949															134.073	0.0364742	0.025641			79.9456	0.0780781	0.0188679			84.6729	0.0600601	0.0566038			10.9033	0.987842	0.967949
			67.5421	0.364742	0.217949															135.101	0.0334347	0.025641			79.9785	0.0750751	0.0188679			84.7791	0.0570571	0.0566038			11.7218	0.984802	0.967949
			67.8558	0.361702	0.217949															135.714	0.0303951	0.025641			80.1611	0.0720721	0.0188679			84.9688	0.0540541	0.0566038			12.8993	0.984802	0.961538
			67.9986	0.358663	0.217949															136.028	0.0273556	0.025641			80.3511	0.0690691	0.0188679			85.1903	0.0540541	0.0503145			13.9184	0.981763	0.961538
			68.0908	0.358663	0.211538															136.848	0.0273556	0.0192308			80.4329	0.0690691	0.0125786			85.346	0.0510511	0.0503145			14.7775	0.981763	0.955128
			68.157	0.355623	0.211538															138.946	0.0243161	0.0192308			80.5717	0.0660661	0.0125786			85.486	0.048048	0.0503145			15.7429	0.978723	0.955128
			68.1681	0.352584	0.211538															141.146	0.0212766	0.0192308			80.897	0.0630631	0.0125786			85.614	0.045045	0.0503145			16.1792	0.978723	0.948718
			68.1931	0.349544	0.211538															142.433	0.0212766	0.0128205			81.1788	0.0600601	0.0125786			85.7805	0.042042	0.0503145			16.7263	0.978723	0.942308
			68.2128	0.346505	0.211538															147.32	0.0182371	0.0128205			81.3161	0.0570571	0.0125786			85.94	0.042042	0.0440252			17.808	0.975684	0.942308
			68.2788	0.346505	0.205128															154.05	0.0151976	0.0128205			81.4139	0.0540541	0.0125786			86.2527	0.039039	0.0440252			19.0141	0.972644	0.942308
			68.3952	0.343465	0.205128															158.24	0.0121581	0.0128205			81.4339	0.0510511	0.0125786			86.5821	0.039039	0.0377358			19.8164	0.972644	0.935897
			68.4742	0.340426	0.205128															164.059	0.0121581	0.00641026			81.4773	0.048048	0.0125786			86.6747	0.039039	0.0314465			20.0487	0.972644	0.929487
			68.5452	0.337386	0.205128															170.963	0.00911854	0.00641026			81.7908	0.048048	0.00628931			86.8172	0.039039	0.0251572			20.8499	0.972644	0.923077
			68.6357	0.334347	0.205128															188.879	0.00607903	0.00641026			82.1983	0.045045	0.00628931			86.9911	0.036036	0.0251572			21.732	0.969605	0.923077
			68.6928	0.331307	0.205128															220.094	0.00607903	0			82.6785	0.042042	0.00628931			87.0547	0.033033	0.0251572			22.1397	0.966565	0.923077
			68.7179	0.328267	0.205128														HESC	272.038	0.00303951	0			83.149	0.039039	0.00628931			87.1196	0.033033	0.0188679			22.462	0.966565	0.916667
			68.7919	0.325228	0.205128															308.909	0	0			83.3863	0.036036	0.00628931			87.3356	0.03003	0.0188679			22.6055	0.963526	0.916667
			68.8655	0.325228	0.198718															5.8388	1	1			83.5524	0.033033	0.00628931			87.7808	0.027027	0.0188679			22.7938	0.960486	0.916667
			68.8913	0.322188	0.198718															7.84953	1	0.99359			83.6004	0.03003	0.00628931			88.1969	0.024024	0.0188679			23.0997	0.960486	0.910256
			68.9166	0.322188	0.192308															8.95247	1	0.987179			84.1141	0.03003	0			88.5348	0.024024	0.0125786			23.7709	0.960486	0.903846
			68.9408	0.319149	0.192308															9.17996	0.99696	0.987179			84.6521	0.027027	0			88.8809	0.024024	0.00628931			24.291	0.957447	0.903846
			69.0837	0.316109	0.192308															9.46141	0.993921	0.987179			84.6872	0.024024	0			89.4839	0.021021	0.00628931			24.3297	0.957447	0.897436
			69.4544	0.31307	0.192308															9.6428	0.990881	0.987179			84.7266	0.021021	0			90.2777	0.018018	0.00628931			24.5974	0.957447	0.891026
			69.711	0.31307	0.185897															9.85749	0.987842	0.987179			84.7895	0.018018	0			90.9243	0.015015	0.00628931			25.0438	0.957447	0.884615
			69.8046	0.31003	0.185897															10.0528	0.987842	0.980769			85.441	0.015015	0			91.3415	0.012012	0.00628931			25.3032	0.957447	0.878205
			69.8951	0.306991	0.185897															10.3114	0.987842	0.974359			86.1989	0.012012	0			91.6201	0.00900901	0.00628931			25.7634	0.957447	0.871795
			69.9621	0.303951	0.185897															10.9033	0.987842	0.967949			87.4245	0.00900901	0			91.9963	0.00900901	0			26.4188	0.954407	0.871795
			70.0256	0.300912	0.185897															11.7218	0.984802	0.967949			88.7413	0.00600601	0			92.3577	0.00600601	0			26.8468	0.954407	0.865385
			70.05	0.300912	0.179487															12.8993	0.984802	0.961538			89.0876	0.003003	0			92.6009	0.003003	0			27.0384	0.954407	0.858974
			70.0943	0.297872	0.179487															13.9184	0.981763	0.961538		FESC	90.2108	0	0		HESC	93.6959	0	0			27.2366	0.954407	0.852564
			70.1503	0.294833	0.179487															14.7775	0.981763	0.955128			3.44231	1	1			5.8388	1	1			27.4607	0.951368	0.852564
			70.1857	0.294833	0.173077															15.7429	0.978723	0.955128			5.58287	1	0.993711			7.84953	1	0.993711			27.612	0.948328	0.852564
			70.2549	0.294833	0.166667															16.1792	0.978723	0.948718			6.91747	0.996997	0.993711			8.95247	1	0.987421			27.7092	0.945289	0.852564
			70.3677	0.294833	0.160256															16.7263	0.978723	0.942308			7.9764	0.996997	0.987421			9.17996	0.996997	0.987421			27.8462	0.942249	0.852564
			70.4412	0.291793	0.160256															17.808	0.975684	0.942308			8.91582	0.996997	0.981132			9.46141	0.993994	0.987421			28.0593	0.942249	0.846154
			70.5531	0.288754	0.160256															19.0141	0.972644	0.942308			9.19929	0.993994	0.981132			9.6428	0.990991	0.987421			28.1842	0.93921	0.846154
			70.6726	0.285714	0.160256															19.8164	0.972644	0.935897			9.45538	0.990991	0.981132			9.85749	0.987988	0.987421			28.2967	0.93617	0.846154
			70.705	0.285714	0.153846															20.0487	0.972644	0.929487			9.63843	0.990991	0.974843			10.0528	0.987988	0.981132			28.5081	0.933131	0.846154
			70.7288	0.282675	0.153846															20.8499	0.972644	0.923077			10.2108	0.990991	0.968553			10.3114	0.987988	0.974843			28.6529	0.933131	0.839744
			70.8203	0.279635	0.153846															21.732	0.969605	0.923077			10.6786	0.987988	0.968553			10.9033	0.987988	0.968553			28.6652	0.930091	0.839744
			70.9537	0.276596	0.153846															22.1397	0.966565	0.923077			10.7302	0.984985	0.968553			11.7218	0.984985	0.968553			28.8641	0.927052	0.839744
			71.0251	0.273556	0.153846															22.462	0.966565	0.916667			10.8495	0.984985	0.962264			12.5027	0.984985	0.962264			29.0641	0.927052	0.833333
			71.0929	0.270517	0.153846															22.6055	0.963526	0.916667			10.9692	0.984985	0.955975			13.2107	0.984985	0.955975			29.1558	0.924012	0.833333
			71.1908	0.267477	0.153846															22.7938	0.960486	0.916667			11.5662	0.984985	0.949686			13.9184	0.981982	0.955975			29.2544	0.924012	0.826923
			71.2917	0.264438	0.153846															23.0997	0.960486	0.910256			12.1597	0.984985	0.943396			14.7775	0.981982	0.949686			29.2917	0.920973	0.826923
			71.4544	0.261398	0.153846															23.7709	0.960486	0.903846			12.2566	0.984985	0.937107			15.7429	0.978979	0.949686			29.3678	0.917933	0.826923
			71.5853	0.258359	0.153846															24.291	0.957447	0.903846			12.355	0.984985	0.930818			16.1792	0.978979	0.943396			29.8584	0.917933	0.820513
			71.6185	0.255319	0.153846															24.3297	0.957447	0.897436			12.906	0.984985	0.924528			16.7263	0.978979	0.937107			30.3609	0.917933	0.814103
			71.6266	0.25228	0.153846															24.5974	0.957447	0.891026			13.4813	0.984985	0.918239			17.808	0.975976	0.937107			30.5367	0.917933	0.807692
			71.6491	0.24924	0.153846															25.0438	0.957447	0.884615			13.5523	0.984985	0.91195			19.0141	0.972973	0.937107			30.894	0.914894	0.807692
			71.7671	0.246201	0.153846															25.3032	0.957447	0.878205			13.7226	0.981982	0.91195			19.8164	0.972973	0.930818			31.216	0.914894	0.801282
			71.9743	0.243161	0.153846															25.7634	0.957447	0.871795			14.1014	0.981982	0.90566			20.0487	0.972973	0.924528			31.5624	0.911854	0.801282
			72.1052	0.240122	0.153846															26.4188	0.954407	0.871795			14.6164	0.978979	0.90566			20.8499	0.972973	0.918239			31.908	0.908815	0.801282
			72.131	0.237082	0.153846															26.8468	0.954407	0.865385			15.8921	0.978979	0.899371			21.732	0.96997	0.918239			31.9893	0.908815	0.794872
			72.1345	0.234043	0.153846															27.0384	0.954407	0.858974			17.2071	0.975976	0.899371			22.1397	0.966967	0.918239			32.003	0.908815	0.788462
			72.1501	0.231003	0.153846															27.2366	0.954407	0.852564			17.5538	0.975976	0.893082			22.462	0.966967	0.91195			32.2273	0.908815	0.782051
			72.248	0.227964	0.153846															27.4607	0.951368	0.852564			19.0975	0.975976	0.886792			22.6055	0.963964	0.91195			32.6605	0.908815	0.775641
			72.3396	0.224924	0.153846															27.612	0.948328	0.852564			20.8829	0.972973	0.886792			22.7938	0.960961	0.91195			33.0995	0.905775	0.775641
			72.3497	0.224924	0.147436															27.7092	0.945289	0.852564			21.4074	0.96997	0.886792			23.0997	0.960961	0.90566			33.5024	0.905775	0.769231
			72.3639	0.221884	0.147436															27.8462	0.942249	0.852564			21.8444	0.96997	0.880503			23.7709	0.960961	0.899371			33.7998	0.902736	0.769231
			72.5549	0.218845	0.147436															28.0593	0.942249	0.846154			22.3845	0.96997	0.874214			24.291	0.957958	0.899371			33.9418	0.902736	0.762821
			72.7416	0.218845	0.141026															28.1842	0.93921	0.846154			22.7945	0.96997	0.867925			24.3297	0.957958	0.893082			34.4463	0.899696	0.762821
			72.7515	0.218845	0.134615															28.2967	0.93617	0.846154			23.2223	0.96997	0.861635			24.5974	0.957958	0.886792			34.9993	0.896657	0.762821
			72.7587	0.218845	0.128205															28.5081	0.933131	0.846154			23.7287	0.966967	0.861635			25.0438	0.957958	0.880503			35.0863	0.896657	0.75641
			72.8438	0.215805	0.128205															28.6529	0.933131	0.839744			24.5692	0.966967	0.855346			25.3032	0.957958	0.874214			35.1965	0.893617	0.75641
			72.9614	0.212766	0.128205															28.6652	0.930091	0.839744			25.2892	0.966967	0.849057			25.7634	0.957958	0.867925			35.3241	0.890578	0.75641
			73.0297	0.212766	0.121795															28.8641	0.927052	0.839744			25.3778	0.966967	0.842767			26.4188	0.954955	0.867925			35.6309	0.887538	0.75641
			73.133	0.212766	0.115385															29.0641	0.927052	0.833333			25.6012	0.966967	0.836478			26.8468	0.954955	0.861635			35.9511	0.884498	0.75641
			73.2588	0.212766	0.108974															29.1558	0.924012	0.833333			25.7625	0.966967	0.830189			27.0384	0.954955	0.855346			36.025	0.881459	0.75641
			73.3496	0.209726	0.108974															29.2544	0.924012	0.826923			25.8475	0.966967	0.823899			27.2366	0.954955	0.849057			36.0893	0.878419	0.75641
			73.4344	0.206687	0.108974															29.2917	0.920973	0.826923			26.118	0.966967	0.81761			27.4607	0.951952	0.849057			36.1475	0.87538	0.75641
			73.5247	0.203647	0.108974															29.3678	0.917933	0.826923			26.3268	0.963964	0.81761			27.612	0.948949	0.849057			36.5835	0.87538	0.75
			73.5754	0.203647	0.102564															29.8584	0.917933	0.820513			26.7406	0.960961	0.81761			27.7092	0.945946	0.849057			37.0375	0.87538	0.74359
			73.6342	0.200608	0.102564															30.3609	0.917933	0.814103			27.9068	0.957958	0.81761			27.8462	0.942943	0.849057			37.1652	0.87538	0.737179
			73.6906	0.197568	0.102564															30.5367	0.917933	0.807692			28.7501	0.957958	0.811321			28.0593	0.942943	0.842767			37.3015	0.87234	0.737179
			73.834	0.194529	0.102564															30.894	0.914894	0.807692			29.0483	0.957958	0.805031			28.1842	0.93994	0.842767			37.4989	0.87234	0.730769
			74.0341	0.191489	0.102564															31.216	0.914894	0.801282			29.3338	0.954955	0.805031			28.2967	0.936937	0.842767			38.0477	0.869301	0.730769
			74.116	0.191489	0.0961538															31.5624	0.911854	0.801282			29.4223	0.954955	0.798742			28.5081	0.933934	0.842767			38.5204	0.869301	0.724359
			74.1975	0.18845	0.0961538															31.908	0.908815	0.801282			29.51	0.951952	0.798742			28.6529	0.933934	0.836478			38.6514	0.869301	0.717949
			74.4361	0.18541	0.0961538															31.9893	0.908815	0.794872			29.7702	0.951952	0.792453			28.6652	0.930931	0.836478			38.7958	0.869301	0.711538
			74.6194	0.182371	0.0961538															32.003	0.908815	0.788462			29.9985	0.948949	0.792453			28.8641	0.927928	0.836478			38.9434	0.866261	0.711538
			74.6316	0.179331	0.0961538															32.2273	0.908815	0.782051			30.2696	0.945946	0.792453			29.0641	0.927928	0.830189			39.0061	0.863222	0.711538
			74.7219	0.176292	0.0961538															32.6605	0.908815	0.775641			30.6066	0.942943	0.792453			29.1558	0.924925	0.830189			39.156	0.860182	0.711538
			74.8904	0.173252	0.0961538															33.0995	0.905775	0.775641			30.7505	0.93994	0.792453			29.2544	0.924925	0.823899			39.4999	0.857143	0.711538
			75.073	0.173252	0.0897436															33.5024	0.905775	0.769231			30.8955	0.936937	0.792453			29.2917	0.921922	0.823899			39.9046	0.854103	0.711538
			75.2297	0.170213	0.0897436															33.7998	0.902736	0.769231			31.3378	0.933934	0.792453			29.3678	0.918919	0.823899			40.1314	0.851064	0.711538
			75.4092	0.170213	0.0833333															33.9418	0.902736	0.762821			31.6762	0.930931	0.792453			29.8584	0.918919	0.81761			40.153	0.851064	0.705128
			75.5334	0.167173	0.0833333															34.4463	0.899696	0.762821			31.8533	0.927928	0.792453			30.3609	0.918919	0.811321			40.3248	0.851064	0.698718
			75.5486	0.164134	0.0833333															34.9993	0.896657	0.762821			32.1464	0.927928	0.786164			30.5367	0.918919	0.805031			40.5912	0.848024	0.698718
			75.5889	0.161094	0.0833333															35.0863	0.896657	0.75641			32.7278	0.927928	0.779874			30.894	0.915916	0.805031			40.7131	0.844985	0.698718
			75.6511	0.158055	0.0833333															35.1965	0.893617	0.75641			33.5193	0.927928	0.773585			31.216	0.915916	0.798742			40.8052	0.841945	0.698718
			75.7568	0.155015	0.0833333															35.3241	0.890578	0.75641			33.8829	0.927928	0.767296			31.5624	0.912913	0.798742			40.9289	0.841945	0.692308
			75.9016	0.155015	0.0769231															35.6309	0.887538	0.75641			33.9496	0.927928	0.761006			31.908	0.90991	0.798742			41.09	0.841945	0.685897
			76.0567	0.151976	0.0769231															35.9511	0.884498	0.75641			34.1266	0.924925	0.761006			31.9893	0.90991	0.792453			41.2251	0.841945	0.679487
			76.1695	0.148936	0.0769231															36.025	0.881459	0.75641			34.2839	0.924925	0.754717			32.003	0.90991	0.786164			41.3618	0.838906	0.679487
			76.2262	0.145897	0.0769231															36.0893	0.878419	0.75641			34.3483	0.921922	0.754717			32.2273	0.90991	0.779874			41.4755	0.838906	0.673077
			76.2771	0.142857	0.0769231															36.1475	0.87538	0.75641			34.4629	0.918919	0.754717			32.6605	0.90991	0.773585			41.5032	0.835866	0.673077
			76.4413	0.139818	0.0769231															36.5835	0.87538	0.75			34.6869	0.915916	0.754717			33.0995	0.906907	0.773585			41.5981	0.832827	0.673077
			76.6059	0.136778	0.0769231															37.0375	0.87538	0.74359			34.9357	0.915916	0.748428			33.5024	0.906907	0.767296			41.6999	0.832827	0.666667
			76.6666	0.133739	0.0769231															37.1652	0.87538	0.737179			35.0814	0.912913	0.748428			33.7998	0.903904	0.767296			41.8211	0.829787	0.666667
			76.7183	0.130699	0.0769231															37.3015	0.87234	0.737179			35.7413	0.90991	0.748428			33.9418	0.903904	0.761006			41.9598	0.826748	0.666667
			76.7787	0.12766	0.0769231															37.4989	0.87234	0.730769			36.409	0.906907	0.748428			34.4463	0.900901	0.761006			42.1427	0.823708	0.666667
			76.9284	0.12766	0.0705128															38.0477	0.869301	0.730769			36.6365	0.903904	0.748428			34.9993	0.897898	0.761006			42.3667	0.823708	0.660256
			77.1162	0.12462	0.0705128															38.5204	0.869301	0.724359			37.1046	0.900901	0.748428			35.0863	0.897898	0.754717			42.5046	0.823708	0.653846
			77.3062	0.121581	0.0705128															38.6514	0.869301	0.717949			37.5176	0.900901	0.742138			35.1965	0.894895	0.754717			42.5927	0.820669	0.653846
			77.4507	0.118541	0.0705128															38.7958	0.869301	0.711538			37.8485	0.897898	0.742138			35.3241	0.891892	0.754717			42.6718	0.817629	0.653846
			77.5253	0.115502	0.0705128															38.9434	0.866261	0.711538			38.3123	0.897898	0.735849			35.6309	0.888889	0.754717			42.7651	0.817629	0.647436
			77.7	0.115502	0.0641026															39.0061	0.863222	0.711538			39.0661	0.897898	0.72956			35.9511	0.885886	0.754717			43.2562	0.81459	0.647436
			77.8636	0.112462	0.0641026															39.156	0.860182	0.711538			39.7245	0.897898	0.72327			36.025	0.882883	0.754717			43.7003	0.81155	0.647436
			78.0667	0.112462	0.0576923															39.4999	0.857143	0.711538			39.8793	0.897898	0.716981			36.0893	0.87988	0.754717			43.7274	0.808511	0.647436
			78.2846	0.109422	0.0576923															39.9046	0.854103	0.711538			40.0948	0.894895	0.716981			36.1475	0.876877	0.754717			43.9632	0.808511	0.641026
			78.3803	0.106383	0.0576923															40.1314	0.851064	0.711538			40.3516	0.891892	0.716981			36.5835	0.876877	0.748428			44.1913	0.805471	0.641026
			78.4386	0.106383	0.0512821															40.153	0.851064	0.705128			40.5137	0.891892	0.710692			37.0375	0.876877	0.742138			44.2169	0.802432	0.641026
			78.5613	0.103343	0.0512821															40.3248	0.851064	0.698718			40.893	0.891892	0.704403			37.1652	0.876877	0.735849			44.2478	0.799392	0.641026
			78.7462	0.103343	0.0448718															40.5912	0.848024	0.698718			41.5287	0.888889	0.704403			37.3015	0.873874	0.735849			44.275	0.796353	0.641026
			78.8457	0.100304	0.0448718															40.7131	0.844985	0.698718			41.9215	0.885886	0.704403			37.3491	0.873874	0.72956			44.2995	0.793313	0.641026
			78.9436	0.0972644	0.0448718															40.8052	0.841945	0.698718			41.9634	0.885886	0.698113			37.501	0.870871	0.72956			44.3212	0.790274	0.641026
			79.0667	0.0942249	0.0448718															40.9289	0.841945	0.692308			42.089	0.882883	0.698113			38.0477	0.867868	0.72956			44.4661	0.787234	0.641026
			79.2253	0.0911854	0.0448718															41.09	0.841945	0.685897			42.2717	0.87988	0.698113			38.5204	0.867868	0.72327			44.7031	0.784195	0.641026
			79.3395	0.0881459	0.0448718															41.2251	0.841945	0.679487			42.3784	0.87988	0.691824			38.6514	0.867868	0.716981			44.8261	0.781155	0.641026
			79.3705	0.0881459	0.0384615															41.3618	0.838906	0.679487			42.5136	0.87988	0.685535			38.7958	0.867868	0.710692			44.9409	0.778116	0.641026
			79.3977	0.0851064	0.0384615															41.4755	0.838906	0.673077			42.6122	0.876877	0.685535			38.9434	0.864865	0.710692			45.0898	0.778116	0.634615
			79.4135	0.0820669	0.0384615															41.5032	0.835866	0.673077			42.7581	0.876877	0.679245			39.0061	0.861862	0.710692			45.1554	0.775076	0.634615
			79.4786	0.0820669	0.0320513															41.5981	0.832827	0.673077			42.9796	0.873874	0.679245			39.156	0.858859	0.710692			45.1635	0.772036	0.634615
			79.6098	0.0820669	0.025641															41.6999	0.832827	0.666667			43.0578	0.873874	0.672956			39.4999	0.855856	0.710692			45.1961	0.772036	0.628205
			79.6907	0.0820669	0.0192308															41.8211	0.829787	0.666667			43.1293	0.873874	0.666667			39.9046	0.852853	0.710692			45.3097	0.772036	0.621795
			79.8171	0.0790274	0.0192308															41.9598	0.826748	0.666667			43.2252	0.873874	0.660377			40.1314	0.84985	0.710692			45.4142	0.768997	0.621795
			79.9456	0.0759878	0.0192308															42.1427	0.823708	0.666667			43.4629	0.873874	0.654088			40.153	0.84985	0.704403			45.4399	0.765957	0.621795
			79.9785	0.0729483	0.0192308															42.3667	0.823708	0.660256			43.8463	0.870871	0.654088			40.3248	0.84985	0.698113			45.49	0.765957	0.615385
			80.1611	0.0699088	0.0192308															42.5046	0.823708	0.653846			44.0911	0.870871	0.647799			40.5912	0.846847	0.698113			45.5907	0.762918	0.615385
			80.3511	0.0668693	0.0192308															42.5927	0.820669	0.653846			44.2078	0.867868	0.647799			40.7131	0.843844	0.698113			45.7389	0.762918	0.608974
			80.4329	0.0668693	0.0128205															42.6718	0.817629	0.653846			44.3439	0.864865	0.647799			40.8052	0.840841	0.698113			45.9985	0.762918	0.602564
			80.5717	0.0638298	0.0128205															42.7651	0.817629	0.647436			44.522	0.864865	0.641509			40.9289	0.840841	0.691824			46.1789	0.759878	0.602564
			80.897	0.0607903	0.0128205															43.2562	0.81459	0.647436			44.7341	0.861862	0.641509			41.09	0.840841	0.685535			46.2126	0.759878	0.596154
			81.1788	0.0577508	0.0128205															43.7003	0.81155	0.647436			44.9194	0.858859	0.641509			41.2251	0.840841	0.679245			46.2687	0.759878	0.589744
			81.3161	0.0547112	0.0128205															43.7274	0.808511	0.647436			45.0455	0.855856	0.641509			41.3618	0.837838	0.679245			46.4097	0.759878	0.583333
			81.4139	0.0516717	0.0128205															43.9632	0.808511	0.641026			45.5012	0.852853	0.641509			41.4755	0.837838	0.672956			46.5759	0.759878	0.576923
			81.4339	0.0486322	0.0128205															44.1913	0.805471	0.641026			45.8977	0.84985	0.641509			41.5032	0.834835	0.672956			46.6812	0.756839	0.576923
			81.4773	0.0455927	0.0128205															44.2169	0.802432	0.641026			45.9224	0.84985	0.63522			41.5981	0.831832	0.672956			46.789	0.756839	0.570513
			81.7908	0.0455927	0.00641026															44.2478	0.799392	0.641026			46.0014	0.84985	0.628931			41.6999	0.831832	0.666667			46.9443	0.753799	0.570513
			82.1983	0.0425532	0.00641026															44.275	0.796353	0.641026			46.0813	0.846847	0.628931			41.8211	0.828829	0.666667			47.1171	0.753799	0.564103
			82.6785	0.0395137	0.00641026															44.2995	0.793313	0.641026			46.163	0.843844	0.628931			41.9598	0.825826	0.666667			47.3418	0.75076	0.564103
			83.149	0.0364742	0.00641026															44.3212	0.790274	0.641026			46.6189	0.840841	0.628931			42.1427	0.822823	0.666667			47.5723	0.74772	0.564103
			83.3863	0.0334347	0.00641026															44.4661	0.787234	0.641026			47.0904	0.837838	0.628931			42.3667	0.822823	0.660377			48.1774	0.744681	0.564103
			83.5524	0.0303951	0.00641026															44.7031	0.784195	0.641026			47.2796	0.834835	0.628931			42.5046	0.822823	0.654088			48.9783	0.741641	0.564103
			83.6004	0.0273556	0.00641026															44.8261	0.781155	0.641026			47.5656	0.834835	0.622642			42.5927	0.81982	0.654088			49.3695	0.738602	0.564103
			84.1141	0.0273556	0															44.9409	0.778116	0.641026			47.7706	0.834835	0.616352			42.6718	0.816817	0.654088			49.4871	0.735562	0.564103
			84.6521	0.0243161	0															45.0898	0.778116	0.634615			47.8596	0.831832	0.616352			42.7651	0.816817	0.647799			49.506	0.732523	0.564103
			84.6872	0.0212766	0															45.1554	0.775076	0.634615			47.9779	0.831832	0.610063			43.2562	0.813814	0.647799			49.6098	0.729483	0.564103
			84.7266	0.0182371	0															45.1635	0.772036	0.634615			48.2737	0.831832	0.603774			43.7003	0.810811	0.647799			49.7323	0.729483	0.557692
			84.7895	0.0151976	0															45.1961	0.772036	0.628205			48.5681	0.828829	0.603774			43.7274	0.807808	0.647799			49.787	0.729483	0.551282
			85.441	0.0121581	0															45.3097	0.772036	0.621795			48.8125	0.825826	0.603774			43.9632	0.807808	0.641509			49.845	0.729483	0.544872
			86.1989	0.00911854	0															45.4142	0.768997	0.621795			49.1446	0.825826	0.597484			44.1913	0.804805	0.641509			49.9673	0.726444	0.544872
			87.4245	0.00607903	0															45.4399	0.765957	0.621795			49.3834	0.822823	0.597484			44.2169	0.801802	0.641509			50.101	0.726444	0.538462
		FESC	88.8645	0.00303951	0															45.49	0.765957	0.615385			49.4846	0.81982	0.597484			44.2478	0.798799	0.641509			50.2065	0.723404	0.538462
			90.2108	0	0															45.5907	0.762918	0.615385			49.5013	0.816817	0.597484			44.275	0.795796	0.641509			50.3598	0.723404	0.532051
			3.44231	1	1															45.7389	0.762918	0.608974			49.6366	0.816817	0.591195			44.2995	0.792793	0.641509			50.5007	0.720365	0.532051
			5.58287	1	0.99359															45.9985	0.762918	0.602564			50.5227	0.813814	0.591195			44.3212	0.78979	0.641509			50.6294	0.717325	0.532051
			6.91747	0.99696	0.99359															46.1789	0.759878	0.602564			51.4805	0.813814	0.584906			44.4661	0.786787	0.641509			50.7549	0.714286	0.532051
			7.9764	0.99696	0.987179															46.2126	0.759878	0.596154			51.724	0.810811	0.584906			44.7031	0.783784	0.641509			50.9709	0.711246	0.532051
			8.91582	0.99696	0.980769															46.2687	0.759878	0.589744			51.9943	0.807808	0.584906			44.8261	0.780781	0.641509			51.1561	0.708207	0.532051
			9.19929	0.993921	0.980769															46.4097	0.759878	0.583333			52.2496	0.804805	0.584906			44.9409	0.777778	0.641509			51.177	0.708207	0.525641
			9.45538	0.990881	0.980769															46.5759	0.759878	0.576923			52.6018	0.801802	0.584906			45.0898	0.777778	0.63522			51.2646	0.705167	0.525641
			9.63843	0.990881	0.974359															46.6812	0.756839	0.576923			52.9555	0.798799	0.584906			45.1554	0.774775	0.63522			51.4223	0.702128	0.525641
			10.2108	0.990881	0.967949															46.789	0.756839	0.570513			53.0692	0.795796	0.584906			45.1635	0.771772	0.63522			51.5041	0.699088	0.525641
			10.6786	0.987842	0.967949															46.9443	0.753799	0.570513			53.2326	0.792793	0.584906			45.1961	0.771772	0.628931			51.557	0.699088	0.519231
			10.7302	0.984802	0.967949															47.1171	0.753799	0.564103			53.4339	0.78979	0.584906			45.3097	0.771772	0.622642			51.6889	0.699088	0.512821
			10.8495	0.984802	0.961538															47.3418	0.75076	0.564103			53.6758	0.78979	0.578616			45.4142	0.768769	0.622642			51.9192	0.696049	0.512821
			10.9692	0.984802	0.955128															47.5723	0.74772	0.564103			53.8787	0.786787	0.578616			45.4399	0.765766	0.622642			52.2472	0.693009	0.512821
			11.5662	0.984802	0.948718															48.1774	0.744681	0.564103			54.0058	0.786787	0.572327			45.49	0.765766	0.616352			52.6239	0.68997	0.512821
			12.2395	0.984802	0.942308															48.9783	0.741641	0.564103			54.1702	0.783784	0.572327			45.5907	0.762763	0.616352			52.8412	0.68997	0.50641
			12.355	0.984802	0.935897															49.3695	0.738602	0.564103			54.3461	0.780781	0.572327			45.7389	0.762763	0.610063			52.9914	0.68693	0.50641
			12.906	0.984802	0.929487															49.4871	0.735562	0.564103			54.5748	0.780781	0.566038			45.9985	0.762763	0.603774			53.1282	0.68693	0.5
			13.4813	0.984802	0.923077															49.506	0.732523	0.564103			54.8799	0.780781	0.559748			46.1789	0.75976	0.603774			53.3098	0.68693	0.49359
			13.5523	0.984802	0.916667															49.6098	0.729483	0.564103			55.0368	0.777778	0.559748			46.2126	0.75976	0.597484			53.633	0.683891	0.49359
			13.7226	0.981763	0.916667															49.7323	0.729483	0.557692			55.0612	0.777778	0.553459			46.2687	0.75976	0.591195			53.8171	0.680851	0.49359
			14.1014	0.981763	0.910256															49.787	0.729483	0.551282			55.2148	0.774775	0.553459			46.4097	0.75976	0.584906			53.8587	0.677812	0.49359
			14.6164	0.978723	0.910256															49.845	0.729483	0.544872			55.4973	0.771772	0.553459			46.5759	0.75976	0.578616			53.959	0.674772	0.49359
			15.8921	0.978723	0.903846															49.9673	0.726444	0.544872			55.7185	0.768769	0.553459			46.6812	0.756757	0.578616			54.0936	0.674772	0.487179
			17.2071	0.975684	0.903846															50.101	0.726444	0.538462			55.8783	0.765766	0.553459			46.789	0.756757	0.572327			54.2653	0.674772	0.480769
			17.5538	0.975684	0.897436															50.2065	0.723404	0.538462			55.9499	0.765766	0.54717			46.9443	0.753754	0.572327			54.4836	0.674772	0.474359
			19.0975	0.975684	0.891026															50.3598	0.723404	0.532051			55.9564	0.762763	0.54717			47.1171	0.753754	0.566038			54.5809	0.674772	0.467949
			20.8829	0.972644	0.891026															50.5007	0.720365	0.532051			55.976	0.75976	0.54717			47.3418	0.750751	0.566038			54.5972	0.674772	0.461538
			21.4074	0.969605	0.891026															50.6294	0.717325	0.532051			56.0868	0.756757	0.54717			47.5723	0.747748	0.566038			54.683	0.671733	0.461538
			21.8444	0.969605	0.884615															50.7549	0.714286	0.532051			56.1886	0.756757	0.540881			48.0669	0.744745	0.566038			54.8005	0.668693	0.461538
			22.3845	0.969605	0.878205															50.9709	0.711246	0.532051			56.3376	0.756757	0.534591			48.5879	0.744745	0.559748			54.8797	0.665653	0.461538
			22.7945	0.969605	0.871795															51.1561	0.708207	0.532051			56.6895	0.753754	0.534591			48.9783	0.741742	0.559748			54.9364	0.662614	0.461538
			23.2223	0.969605	0.865385															51.177	0.708207	0.525641			56.9325	0.750751	0.534591			49.3695	0.738739	0.559748			55.0978	0.659574	0.461538
			23.7287	0.966565	0.865385															51.2646	0.705167	0.525641			57.1396	0.747748	0.534591			49.4871	0.735736	0.559748			55.2605	0.656535	0.461538
			24.5692	0.966565	0.858974															51.4223	0.702128	0.525641			57.3449	0.744745	0.534591			49.506	0.732733	0.559748			55.3282	0.653495	0.461538
			25.2892	0.966565	0.852564															51.5041	0.699088	0.525641			57.4004	0.744745	0.528302			49.6098	0.72973	0.559748			55.405	0.653495	0.455128
			25.3778	0.966565	0.846154															51.557	0.699088	0.519231			57.4865	0.744745	0.522013			49.7323	0.72973	0.553459			55.543	0.653495	0.448718
			25.6012	0.966565	0.839744															51.6889	0.699088	0.512821			57.6593	0.744745	0.515723			49.787	0.72973	0.54717			55.7045	0.650456	0.448718
			25.7625	0.966565	0.833333															51.9192	0.696049	0.512821			57.8707	0.741742	0.515723			49.8105	0.72973	0.540881			55.768	0.650456	0.442308
			25.8475	0.966565	0.826923															52.2472	0.693009	0.512821			58.0231	0.738739	0.515723			49.8452	0.72973	0.534591			55.7912	0.650456	0.435897
			26.118	0.966565	0.820513															52.6239	0.68997	0.512821			58.1309	0.738739	0.509434			49.9673	0.726727	0.534591			55.8756	0.647416	0.435897
			26.3268	0.963526	0.820513															52.8412	0.68997	0.50641			58.2527	0.735736	0.509434			50.101	0.726727	0.528302			55.9506	0.644377	0.435897
			26.7406	0.960486	0.820513															52.9914	0.68693	0.50641			58.448	0.735736	0.503145			50.2065	0.723724	0.528302			56.005	0.641337	0.435897
			27.9068	0.957447	0.820513															53.1282	0.68693	0.5			58.5904	0.735736	0.496855			50.3598	0.723724	0.522013			56.1712	0.638298	0.435897
			28.7501	0.957447	0.814103															53.3098	0.68693	0.49359			58.664	0.732733	0.496855			50.5007	0.720721	0.522013			56.3061	0.638298	0.429487
			29.0483	0.957447	0.807692															53.633	0.683891	0.49359			58.7733	0.72973	0.496855			50.6294	0.717718	0.522013			56.423	0.638298	0.423077
			29.3338	0.954407	0.807692															53.8171	0.680851	0.49359			58.8388	0.726727	0.496855			50.7549	0.714715	0.522013			56.5969	0.638298	0.416667
			29.4223	0.954407	0.801282															53.8587	0.677812	0.49359			58.8588	0.723724	0.496855			50.9709	0.711712	0.522013			56.6879	0.638298	0.410256
			29.51	0.951368	0.801282															53.959	0.674772	0.49359			58.9912	0.723724	0.490566			51.1561	0.708709	0.522013			56.7416	0.635258	0.410256
			29.7702	0.951368	0.794872															54.0936	0.674772	0.487179			59.1517	0.720721	0.490566			51.177	0.708709	0.515723			56.8033	0.632219	0.410256
			29.9985	0.948328	0.794872															54.2653	0.674772	0.480769			59.2135	0.717718	0.490566			51.2646	0.705706	0.515723			56.8646	0.629179	0.410256
			30.2696	0.945289	0.794872															54.4836	0.674772	0.474359			59.3243	0.717718	0.484277			51.4223	0.702703	0.515723			56.9571	0.62614	0.410256
			30.6066	0.942249	0.794872															54.5809	0.674772	0.467949			59.5106	0.714715	0.484277			51.5041	0.6997	0.515723			57.0301	0.62614	0.403846
			30.7505	0.93921	0.794872															54.5972	0.674772	0.461538			59.6995	0.711712	0.484277			51.557	0.6997	0.509434			57.0557	0.62614	0.397436
			30.8955	0.93617	0.794872															54.683	0.671733	0.461538			59.927	0.708709	0.484277			51.6787	0.6997	0.503145			57.1419	0.62614	0.391026
			31.3378	0.933131	0.794872															54.8005	0.668693	0.461538			60.1618	0.705706	0.484277			51.7619	0.696697	0.503145			57.277	0.6231	0.391026
			31.6762	0.930091	0.794872															54.8797	0.665653	0.461538			60.3092	0.702703	0.484277			51.9192	0.693694	0.503145			57.3428	0.620061	0.391026
			31.8533	0.927052	0.794872															54.9364	0.662614	0.461538			60.4207	0.6997	0.484277			52.2472	0.690691	0.503145			57.4114	0.617021	0.391026
			32.1464	0.927052	0.788462															55.0978	0.659574	0.461538			60.4942	0.696697	0.484277			52.6239	0.687688	0.503145			57.5433	0.613982	0.391026
			32.7278	0.927052	0.782051															55.2605	0.656535	0.461538			60.5724	0.693694	0.484277			52.8412	0.687688	0.496855			57.6425	0.610942	0.391026
			33.5193	0.927052	0.775641															55.3282	0.653495	0.461538			60.7058	0.690691	0.484277			52.9914	0.684685	0.496855			57.6666	0.610942	0.384615
			33.8829	0.927052	0.769231															55.405	0.653495	0.455128			60.9824	0.687688	0.484277			53.1282	0.684685	0.490566			57.7275	0.607903	0.384615
			33.9496	0.927052	0.762821															55.543	0.653495	0.448718			61.1946	0.687688	0.477987			53.3098	0.684685	0.484277			57.7898	0.607903	0.378205
			34.1266	0.924012	0.762821															55.7045	0.650456	0.448718			61.3634	0.684685	0.477987			53.633	0.681682	0.484277			57.8312	0.607903	0.371795
			34.2839	0.924012	0.75641															55.768	0.650456	0.442308			61.6549	0.681682	0.477987			53.8171	0.678679	0.484277			57.9578	0.604863	0.371795
			34.3483	0.920973	0.75641															55.7912	0.650456	0.435897			61.8304	0.678679	0.477987			53.8587	0.675676	0.484277			58.0874	0.601824	0.371795
			34.4629	0.917933	0.75641															55.8756	0.647416	0.435897			61.9194	0.678679	0.471698			53.959	0.672673	0.484277			58.1678	0.598784	0.371795
			34.6869	0.914894	0.75641															55.9506	0.644377	0.435897			61.9834	0.678679	0.465409			54.0936	0.672673	0.477987			58.2292	0.595745	0.371795
			34.9357	0.914894	0.75															56.005	0.641337	0.435897			62.1585	0.675676	0.465409			54.2653	0.672673	0.471698			58.2546	0.592705	0.371795
			35.0814	0.911854	0.75															56.1712	0.638298	0.435897			62.4682	0.672673	0.465409			54.4836	0.672673	0.465409			58.3196	0.589666	0.371795
			35.7413	0.908815	0.75															56.3061	0.638298	0.429487			62.6917	0.66967	0.465409			54.5809	0.672673	0.459119			58.3878	0.589666	0.365385
			36.409	0.905775	0.75															56.423	0.638298	0.423077			62.7693	0.666667	0.465409			54.5972	0.672673	0.45283			58.4521	0.586626	0.365385
			36.6365	0.902736	0.75															56.5969	0.638298	0.416667			62.833	0.666667	0.459119			54.683	0.66967	0.45283			58.5312	0.583587	0.365385
			37.1046	0.899696	0.75															56.6879	0.638298	0.410256			62.9238	0.666667	0.45283			54.8005	0.666667	0.45283			58.5745	0.583587	0.358974
			37.5176	0.899696	0.74359															56.7416	0.635258	0.410256			62.9849	0.663664	0.45283			54.8797	0.663664	0.45283			58.601	0.580547	0.358974
			37.8485	0.896657	0.74359															56.8033	0.632219	0.410256			63.0286	0.663664	0.446541			54.9364	0.660661	0.45283			58.6884	0.577508	0.358974
			38.3123	0.896657	0.737179															56.8646	0.629179	0.410256			63.0874	0.660661	0.446541			55.0978	0.657658	0.45283			58.7956	0.577508	0.352564
			39.0661	0.896657	0.730769															56.9571	0.62614	0.410256			63.1652	0.657658	0.446541			55.2605	0.654655	0.45283			58.8569	0.574468	0.352564
			39.7245	0.896657	0.724359															57.0301	0.62614	0.403846			63.3287	0.657658	0.440252			55.3282	0.651652	0.45283			58.9018	0.574468	0.346154
			39.8793	0.896657	0.717949															57.0557	0.62614	0.397436			63.4732	0.654655	0.440252			55.405	0.651652	0.446541			58.9149	0.574468	0.339744
			40.0948	0.893617	0.717949															57.1419	0.62614	0.391026			63.5163	0.654655	0.433962			55.543	0.651652	0.440252			59.0001	0.571429	0.339744
			40.3516	0.890578	0.717949															57.277	0.6231	0.391026			63.5826	0.651652	0.433962			55.7045	0.648649	0.440252			59.14	0.568389	0.339744
			40.5137	0.890578	0.711538															57.3428	0.620061	0.391026			63.6631	0.648649	0.433962			55.768	0.648649	0.433962			59.4027	0.56535	0.339744
			40.893	0.890578	0.705128															57.4114	0.617021	0.391026			63.7218	0.645646	0.433962			55.7912	0.648649	0.427673			59.6076	0.56535	0.333333
			41.5287	0.887538	0.705128															57.5433	0.613982	0.391026			63.7776	0.642643	0.433962			55.8756	0.645646	0.427673			59.672	0.56231	0.333333
			41.9215	0.884498	0.705128															57.6425	0.610942	0.391026			64.0333	0.63964	0.433962			55.9506	0.642643	0.427673			59.77	0.559271	0.333333
			41.9634	0.884498	0.698718															57.6666	0.610942	0.384615			64.2666	0.636637	0.433962			56.005	0.63964	0.427673			59.8352	0.556231	0.333333
			42.089	0.881459	0.698718															57.7275	0.607903	0.384615			64.3415	0.633634	0.433962			56.1712	0.636637	0.427673			59.9706	0.553191	0.333333
			42.2717	0.878419	0.698718															57.7898	0.607903	0.378205			64.4405	0.633634	0.427673			56.3061	0.636637	0.421384			60.0779	0.550152	0.333333
			42.3784	0.878419	0.692308															57.8312	0.607903	0.371795			64.5012	0.630631	0.427673			56.423	0.636637	0.415094			60.3391	0.547112	0.333333
			42.5136	0.878419	0.685897															57.9578	0.604863	0.371795			64.5498	0.627628	0.427673			56.5969	0.636637	0.408805			60.6818	0.547112	0.326923
			42.6122	0.87538	0.685897															58.0874	0.601824	0.371795			64.7679	0.624625	0.427673			56.6879	0.636637	0.402516			60.7916	0.544073	0.326923
			42.7581	0.87538	0.679487															58.1678	0.598784	0.371795			65.013	0.624625	0.421384			56.7416	0.633634	0.402516			60.8365	0.541033	0.326923
			42.9796	0.87234	0.679487															58.2292	0.595745	0.371795			65.1161	0.621622	0.421384			56.8033	0.630631	0.402516			60.9108	0.537994	0.326923
			43.0578	0.87234	0.673077															58.2546	0.592705	0.371795			65.1816	0.621622	0.415094			56.8646	0.627628	0.402516			60.9712	0.537994	0.320513
			43.1293	0.87234	0.666667															58.3196	0.589666	0.371795			65.2153	0.618619	0.415094			56.9571	0.624625	0.402516			60.9875	0.534954	0.320513
			43.2252	0.87234	0.660256															58.3878	0.589666	0.365385			65.3	0.615616	0.415094			57.0301	0.624625	0.396226			61.0134	0.531915	0.320513
			43.4629	0.87234	0.653846															58.4521	0.586626	0.365385			65.4696	0.615616	0.408805			57.0557	0.624625	0.389937			61.0922	0.528875	0.320513
			43.8463	0.869301	0.653846															58.5312	0.583587	0.365385			65.6921	0.612613	0.408805			57.1419	0.624625	0.383648			61.2204	0.525836	0.320513
			44.0911	0.869301	0.647436															58.5745	0.583587	0.358974			65.8195	0.60961	0.408805			57.277	0.621622	0.383648			61.2929	0.522796	0.320513
			44.2078	0.866261	0.647436															58.601	0.580547	0.358974			65.853	0.606607	0.408805			57.3428	0.618619	0.383648			61.3275	0.519757	0.320513
			44.3439	0.863222	0.647436															58.6884	0.577508	0.358974			66.0284	0.606607	0.402516			57.4114	0.615616	0.383648			61.3995	0.519757	0.314103
			44.522	0.863222	0.641026															58.7956	0.577508	0.352564			66.2983	0.603604	0.402516			57.5433	0.612613	0.383648			61.4537	0.516717	0.314103
			44.7341	0.860182	0.641026															58.8569	0.574468	0.352564			66.4256	0.600601	0.402516			57.6425	0.60961	0.383648			61.4669	0.513678	0.314103
			44.9194	0.857143	0.641026															58.9018	0.574468	0.346154			66.4649	0.600601	0.396226			57.6666	0.60961	0.377358			61.5004	0.510638	0.314103
			45.0455	0.854103	0.641026															58.9149	0.574468	0.339744			66.549	0.600601	0.389937			57.7275	0.606607	0.377358			61.5595	0.507599	0.314103
			45.5085	0.851064	0.641026															59.0001	0.571429	0.339744			66.6553	0.597598	0.389937			57.7898	0.606607	0.371069			61.6125	0.504559	0.314103
			45.9224	0.851064	0.634615															59.14	0.568389	0.339744			66.7205	0.594595	0.389937			57.8312	0.606607	0.36478			61.6614	0.50152	0.314103
			46.0014	0.851064	0.628205															59.4027	0.56535	0.339744			66.7838	0.594595	0.383648			57.9578	0.603604	0.36478			61.7638	0.49848	0.314103
			46.0813	0.848024	0.628205															59.6076	0.56535	0.333333			66.8484	0.591592	0.383648			58.0874	0.600601	0.36478			61.8391	0.49848	0.307692
			46.163	0.844985	0.628205															59.672	0.56231	0.333333			66.992	0.588589	0.383648			58.1678	0.597598	0.36478			61.875	0.495441	0.307692
			46.6189	0.841945	0.628205															59.77	0.559271	0.333333			67.2384	0.585586	0.383648			58.2292	0.594595	0.36478			61.9734	0.492401	0.307692
			47.0904	0.838906	0.628205															59.8352	0.556231	0.333333			67.3711	0.582583	0.383648			58.2546	0.591592	0.36478			62.0886	0.489362	0.307692
			47.2796	0.835866	0.628205															59.9706	0.553191	0.333333			67.502	0.57958	0.383648			58.3196	0.588589	0.36478			62.1539	0.486322	0.307692
			47.5656	0.835866	0.621795															60.0779	0.550152	0.333333			67.622	0.57958	0.377358			58.3878	0.588589	0.358491			62.3026	0.483283	0.307692
			47.7706	0.835866	0.615385															60.3391	0.547112	0.333333			67.6565	0.576577	0.377358			58.4521	0.585586	0.358491			62.4669	0.483283	0.301282
			47.8596	0.832827	0.615385															60.6818	0.547112	0.326923			67.7052	0.573574	0.377358			58.5312	0.582583	0.358491			62.5688	0.480243	0.301282
			47.9779	0.832827	0.608974															60.7916	0.544073	0.326923			67.7419	0.573574	0.371069			58.5745	0.582583	0.352201			62.7741	0.480243	0.294872
			48.2737	0.832827	0.602564															60.8365	0.541033	0.326923			67.8016	0.570571	0.371069			58.601	0.57958	0.352201			63.0134	0.480243	0.288462
			48.5681	0.829787	0.602564															60.9108	0.537994	0.326923			67.8666	0.567568	0.371069			58.6884	0.576577	0.352201			63.227	0.477204	0.288462
			48.8125	0.826748	0.602564															60.9712	0.537994	0.320513			67.8903	0.564565	0.371069			58.7956	0.576577	0.345912			63.3516	0.474164	0.288462
			49.1446	0.826748	0.596154															60.9875	0.534954	0.320513			67.959	0.564565	0.36478			58.8569	0.573574	0.345912			63.4349	0.474164	0.282051
			49.3834	0.823708	0.596154															61.0134	0.531915	0.320513			68.1188	0.564565	0.358491			58.9018	0.573574	0.339623			63.5077	0.474164	0.275641
			49.4846	0.820669	0.596154															61.0922	0.528875	0.320513			68.2524	0.564565	0.352201			58.9149	0.573574	0.333333			63.5892	0.471125	0.275641
			49.5013	0.817629	0.596154															61.2204	0.525836	0.320513			68.299	0.561562	0.352201			59.0001	0.570571	0.333333			63.7437	0.468085	0.275641
			49.6366	0.817629	0.589744															61.2929	0.522796	0.320513			68.3302	0.558559	0.352201			59.14	0.567568	0.333333			63.8404	0.465046	0.275641
			50.5227	0.81459	0.589744															61.3275	0.519757	0.320513			68.3908	0.555556	0.352201			59.4027	0.564565	0.333333			63.8694	0.462006	0.275641
			51.4805	0.81459	0.583333															61.3995	0.519757	0.314103			68.5134	0.555556	0.345912			59.6076	0.564565	0.327044			63.9413	0.458967	0.275641
			51.724	0.81155	0.583333															61.4537	0.516717	0.314103			68.6136	0.555556	0.339623			59.672	0.561562	0.327044			64.0316	0.455927	0.275641
			51.9943	0.808511	0.583333															61.4669	0.513678	0.314103			68.7168	0.552553	0.339623			59.77	0.558559	0.327044			64.1038	0.452888	0.275641
			52.2496	0.805471	0.583333															61.5004	0.510638	0.314103			68.8108	0.54955	0.339623			59.8352	0.555556	0.327044			64.1817	0.449848	0.275641
			52.6018	0.802432	0.583333															61.5595	0.507599	0.314103			68.8207	0.546547	0.339623			59.9706	0.552553	0.327044			64.2197	0.446809	0.275641
			52.9555	0.799392	0.583333															61.6125	0.504559	0.314103			68.8859	0.546547	0.333333			60.0779	0.54955	0.327044			64.2626	0.443769	0.275641
			53.0692	0.796353	0.583333															61.6614	0.50152	0.314103			68.9668	0.546547	0.327044			60.3391	0.546547	0.327044			64.4069	0.440729	0.275641
			53.2326	0.793313	0.583333															61.7638	0.49848	0.314103			69.0076	0.543544	0.327044			60.6818	0.546547	0.320755			64.5105	0.43769	0.275641
			53.4339	0.790274	0.583333															61.8391	0.49848	0.307692			69.0345	0.540541	0.327044			60.7916	0.543544	0.320755			64.5944	0.43465	0.275641
			53.6758	0.790274	0.576923															61.875	0.495441	0.307692			69.0518	0.537538	0.327044			60.8365	0.540541	0.320755			64.6817	0.431611	0.275641
			53.9256	0.787234	0.576923															61.9734	0.492401	0.307692			69.1225	0.534535	0.327044			60.9108	0.537538	0.320755			64.7731	0.428571	0.275641
			54.1702	0.784195	0.576923															62.0886	0.489362	0.307692			69.2153	0.534535	0.320755			60.9712	0.537538	0.314465			64.8625	0.425532	0.275641
			54.3461	0.781155	0.576923															62.1539	0.486322	0.307692			69.2822	0.531532	0.320755			60.9875	0.534535	0.314465			64.9022	0.425532	0.269231
			54.5748	0.781155	0.570513															62.3026	0.483283	0.307692			69.3369	0.531532	0.314465			61.0134	0.531532	0.314465			64.9945	0.422492	0.269231
			54.8799	0.781155	0.564103															62.4669	0.483283	0.301282			69.3836	0.528529	0.314465			61.0922	0.528529	0.314465			65.144	0.422492	0.262821
			55.0368	0.778116	0.564103															62.5688	0.480243	0.301282			69.4249	0.525526	0.314465			61.2204	0.525526	0.314465			65.247	0.419453	0.262821
			55.0612	0.778116	0.557692															62.7741	0.480243	0.294872			69.5751	0.522523	0.314465			61.2929	0.522523	0.314465			65.5143	0.416413	0.262821
			55.2148	0.775076	0.557692															63.0134	0.480243	0.288462			69.7369	0.522523	0.308176			61.3275	0.51952	0.314465			65.7856	0.413374	0.262821
			55.4973	0.772036	0.557692															63.227	0.477204	0.288462			69.7852	0.522523	0.301887			61.3995	0.51952	0.308176			65.8772	0.410334	0.262821
			55.7185	0.768997	0.557692															63.3516	0.474164	0.288462			69.8449	0.522523	0.295597			61.4537	0.516517	0.308176			66.1378	0.407295	0.262821
			55.8783	0.765957	0.557692															63.4349	0.474164	0.282051			69.9431	0.51952	0.295597			61.4669	0.513514	0.308176			66.3902	0.404255	0.262821
			55.9499	0.765957	0.551282															63.5077	0.474164	0.275641			70.0542	0.516517	0.295597			61.5004	0.510511	0.308176			66.515	0.404255	0.25641
			55.9564	0.762918	0.551282															63.5892	0.471125	0.275641			70.1701	0.513514	0.295597			61.5595	0.507508	0.308176			66.5717	0.404255	0.25
			55.976	0.759878	0.551282															63.7437	0.468085	0.275641			70.2362	0.510511	0.295597			61.6125	0.504505	0.308176			66.6049	0.404255	0.24359
			56.0868	0.756839	0.551282															63.8404	0.465046	0.275641			70.26	0.507508	0.295597			61.6614	0.501502	0.308176			66.681	0.404255	0.237179
			56.1886	0.756839	0.544872															63.8694	0.462006	0.275641			70.3222	0.504505	0.295597			61.7638	0.498498	0.308176			66.7665	0.401216	0.237179
			56.3376	0.756839	0.538462															63.9413	0.458967	0.275641			70.3706	0.501502	0.295597			61.8391	0.498498	0.301887			66.8109	0.398176	0.237179
			56.6895	0.753799	0.538462															64.0316	0.455927	0.275641			70.4315	0.498498	0.295597			61.875	0.495495	0.301887			66.8194	0.398176	0.230769
			56.9325	0.75076	0.538462															64.1038	0.452888	0.275641			70.4934	0.498498	0.289308			61.9734	0.492492	0.301887			66.8338	0.395137	0.230769
			57.1396	0.74772	0.538462															64.1817	0.449848	0.275641			70.5132	0.498498	0.283019			62.0886	0.489489	0.301887			66.85	0.392097	0.230769
			57.3449	0.744681	0.538462															64.2197	0.446809	0.275641			70.5303	0.498498	0.27673			62.1539	0.486486	0.301887			66.928	0.389058	0.230769
			57.4004	0.744681	0.532051															64.2626	0.443769	0.275641			70.535	0.498498	0.27044			62.3026	0.483483	0.301887			67.0137	0.386018	0.230769
			57.4865	0.744681	0.525641															64.4069	0.440729	0.275641			70.5579	0.495495	0.27044			62.4669	0.483483	0.295597			67.0552	0.382979	0.230769
			57.6593	0.744681	0.519231															64.5105	0.43769	0.275641			70.585	0.492492	0.27044			62.5688	0.48048	0.295597			67.1096	0.379939	0.230769
			57.8707	0.741641	0.519231															64.5944	0.43465	0.275641			70.7323	0.489489	0.27044			62.7741	0.48048	0.289308			67.1528	0.3769	0.230769
			58.0231	0.738602	0.519231															64.6817	0.431611	0.275641			70.9374	0.486486	0.27044			63.0134	0.48048	0.283019			67.1931	0.37386	0.230769
			58.1309	0.738602	0.512821															64.7731	0.428571	0.275641			71.0135	0.483483	0.27044			63.227	0.477477	0.283019			67.2168	0.37386	0.224359
			58.2527	0.735562	0.512821															64.8625	0.425532	0.275641			71.2143	0.48048	0.27044			63.3516	0.474474	0.283019			67.2271	0.370821	0.224359
			58.448	0.735562	0.50641															64.9022	0.425532	0.269231			71.4652	0.477477	0.27044			63.4349	0.474474	0.27673			67.2741	0.367781	0.224359
			58.5904	0.735562	0.5															64.9945	0.422492	0.269231			71.529	0.477477	0.264151			63.5077	0.474474	0.27044			67.3266	0.367781	0.217949
			58.664	0.732523	0.5															65.144	0.422492	0.262821			71.5945	0.474474	0.264151			63.5892	0.471471	0.27044			67.5421	0.364742	0.217949
			58.7733	0.729483	0.5															65.247	0.419453	0.262821			71.6702	0.471471	0.264151			63.7437	0.468468	0.27044			67.8558	0.361702	0.217949
			58.8388	0.726444	0.5															65.5143	0.416413	0.262821			71.6948	0.468468	0.264151			63.8404	0.465465	0.27044			67.9986	0.358663	0.217949
			58.8588	0.723404	0.5															65.7856	0.413374	0.262821			71.9029	0.465465	0.264151			63.8694	0.462462	0.27044			68.0908	0.358663	0.211538
			59.0214	0.723404	0.49359															65.8772	0.410334	0.262821			72.0975	0.462462	0.264151			63.9413	0.459459	0.27044			68.157	0.355623	0.211538
			59.2135	0.720365	0.49359															66.1378	0.407295	0.262821			72.1429	0.459459	0.264151			64.0316	0.456456	0.27044			68.1681	0.352584	0.211538
			59.3243	0.720365	0.487179															66.3902	0.404255	0.262821			72.1995	0.456456	0.264151			64.1038	0.453453	0.27044			68.1931	0.349544	0.211538
			59.5106	0.717325	0.487179															66.515	0.404255	0.25641			72.2268	0.453453	0.264151			64.1817	0.45045	0.27044			68.2128	0.346505	0.211538
			59.6995	0.714286	0.487179															66.5717	0.404255	0.25			72.2703	0.45045	0.264151			64.2197	0.447447	0.27044			68.2788	0.346505	0.205128
			59.927	0.711246	0.487179															66.6049	0.404255	0.24359			72.3321	0.447447	0.264151			64.2626	0.444444	0.27044			68.3952	0.343465	0.205128
			60.1618	0.708207	0.487179															66.681	0.404255	0.237179			72.3846	0.444444	0.264151			64.4069	0.441441	0.27044			68.4742	0.340426	0.205128
			60.3092	0.705167	0.487179															66.7665	0.401216	0.237179			72.432	0.441441	0.264151			64.5105	0.438438	0.27044			68.5452	0.337386	0.205128
			60.4207	0.702128	0.487179															66.8109	0.398176	0.237179			72.5646	0.438438	0.264151			64.5944	0.435435	0.27044			68.6357	0.334347	0.205128
			60.4942	0.699088	0.487179															66.8194	0.398176	0.230769			72.6779	0.435435	0.264151			64.6817	0.432432	0.27044			68.6928	0.331307	0.205128
			60.5724	0.696049	0.487179															66.8338	0.395137	0.230769			72.7056	0.432432	0.264151			64.7731	0.429429	0.27044			68.7179	0.328267	0.205128
			60.7058	0.693009	0.487179															66.85	0.392097	0.230769			72.7307	0.432432	0.257862			64.8625	0.426426	0.27044			68.7919	0.325228	0.205128
			60.9824	0.68997	0.487179															66.928	0.389058	0.230769			72.742	0.429429	0.257862			64.9022	0.426426	0.264151			68.8655	0.325228	0.198718
			61.1946	0.68997	0.480769															67.0137	0.386018	0.230769			72.7736	0.429429	0.251572			64.9945	0.423423	0.264151			68.8913	0.322188	0.198718
			61.3634	0.68693	0.480769															67.0552	0.382979	0.230769			72.9371	0.429429	0.245283			65.144	0.423423	0.257862			68.9166	0.322188	0.192308
			61.6549	0.683891	0.480769															67.1096	0.379939	0.230769			73.0984	0.426426	0.245283			65.247	0.42042	0.257862			68.9408	0.319149	0.192308
			61.8304	0.680851	0.480769															67.1528	0.3769	0.230769			73.1369	0.423423	0.245283			65.5143	0.417417	0.257862			69.0837	0.316109	0.192308
			61.9194	0.680851	0.474359															67.1931	0.37386	0.230769			73.1837	0.423423	0.238994			65.7856	0.414414	0.257862			69.4544	0.31307	0.192308
			61.9834	0.680851	0.467949															67.2168	0.37386	0.224359			73.2308	0.42042	0.238994			65.8772	0.411411	0.257862			69.711	0.31307	0.185897
			62.1585	0.677812	0.467949															67.2271	0.370821	0.224359			73.2868	0.417417	0.238994			66.1378	0.408408	0.257862			69.8046	0.31003	0.185897
			62.4682	0.674772	0.467949															67.2741	0.367781	0.224359			73.3724	0.414414	0.238994			66.3902	0.405405	0.257862			69.8951	0.306991	0.185897
			62.6917	0.671733	0.467949															67.3266	0.367781	0.217949			73.4442	0.414414	0.232704			66.515	0.405405	0.251572			69.9621	0.303951	0.185897
			62.7693	0.668693	0.467949															67.5421	0.364742	0.217949			73.4992	0.411411	0.232704			66.5717	0.405405	0.245283			70.0256	0.300912	0.185897
			62.833	0.668693	0.461538															67.8558	0.361702	0.217949			73.5439	0.408408	0.232704			66.6049	0.405405	0.238994			70.05	0.300912	0.179487
			62.9238	0.668693	0.455128															67.9986	0.358663	0.217949			73.6991	0.405405	0.232704			66.681	0.405405	0.232704			70.0943	0.297872	0.179487
			62.9849	0.665653	0.455128															68.0908	0.358663	0.211538			73.9428	0.402402	0.232704			66.73	0.402402	0.232704			70.1503	0.294833	0.179487
			63.0286	0.665653	0.448718															68.157	0.355623	0.211538			74.08	0.402402	0.226415			66.7701	0.399399	0.232704			70.1857	0.294833	0.173077
			63.0874	0.662614	0.448718															68.1681	0.352584	0.211538			74.1243	0.399399	0.226415			66.8109	0.396396	0.232704			70.2549	0.294833	0.166667
			63.1652	0.659574	0.448718															68.1931	0.349544	0.211538			74.1393	0.396396	0.226415			66.8194	0.396396	0.226415			70.3677	0.294833	0.160256
			63.3287	0.659574	0.442308															68.2128	0.346505	0.211538			74.1751	0.393393	0.226415			66.8338	0.393393	0.226415			70.4412	0.291793	0.160256
			63.4732	0.656535	0.442308															68.2788	0.346505	0.205128			74.2221	0.39039	0.226415			66.85	0.39039	0.226415			70.5531	0.288754	0.160256
			63.5163	0.656535	0.435897															68.3952	0.343465	0.205128			74.2848	0.387387	0.226415			66.928	0.387387	0.226415			70.6726	0.285714	0.160256
			63.5826	0.653495	0.435897															68.4742	0.340426	0.205128			74.3637	0.387387	0.220126			67.0137	0.384384	0.226415			70.705	0.285714	0.153846
			63.6631	0.650456	0.435897															68.5452	0.337386	0.205128			74.3935	0.387387	0.213836			67.0552	0.381381	0.226415			70.7288	0.282675	0.153846
			63.7218	0.647416	0.435897															68.6357	0.334347	0.205128			74.4048	0.384384	0.213836			67.1096	0.378378	0.226415			70.8203	0.279635	0.153846
			63.7776	0.644377	0.435897															68.6928	0.331307	0.205128			74.4504	0.381381	0.213836			67.1528	0.375375	0.226415			70.9537	0.276596	0.153846
			64.0333	0.641337	0.435897															68.7179	0.328267	0.205128			74.6123	0.378378	0.213836			67.1931	0.372372	0.226415			71.0251	0.273556	0.153846
			64.2666	0.638298	0.435897															68.7919	0.325228	0.205128			74.775	0.378378	0.207547			67.2168	0.372372	0.220126			71.0929	0.270517	0.153846
			64.3415	0.635258	0.435897															68.8655	0.325228	0.198718			74.8377	0.375375	0.207547			67.2271	0.369369	0.220126			71.1908	0.267477	0.153846
			64.4405	0.635258	0.429487															68.8913	0.322188	0.198718			74.9477	0.372372	0.207547			67.2741	0.366366	0.220126			71.2917	0.264438	0.153846
			64.5012	0.632219	0.429487															68.9166	0.322188	0.192308			75.0353	0.369369	0.207547			67.3266	0.366366	0.213836			71.4544	0.261398	0.153846
			64.5498	0.629179	0.429487															68.9408	0.319149	0.192308			75.0427	0.366366	0.207547			67.5421	0.363363	0.213836			71.5853	0.258359	0.153846
			64.7679	0.62614	0.429487															69.0837	0.316109	0.192308			75.1787	0.366366	0.201258			67.8558	0.36036	0.213836			71.6185	0.255319	0.153846
			65.013	0.62614	0.423077															69.4544	0.31307	0.192308			75.3286	0.363363	0.201258			67.9986	0.357357	0.213836			71.6266	0.25228	0.153846
			65.1161	0.6231	0.423077															69.711	0.31307	0.185897			75.3728	0.36036	0.201258			68.0908	0.357357	0.207547			71.6491	0.24924	0.153846
			65.1816	0.6231	0.416667															69.8046	0.31003	0.185897			75.4211	0.357357	0.201258			68.157	0.354354	0.207547			71.7671	0.246201	0.153846
			65.2153	0.620061	0.416667															69.8951	0.306991	0.185897			75.4556	0.357357	0.194969			68.1681	0.351351	0.207547			71.9743	0.243161	0.153846
			65.3	0.617021	0.416667															69.9621	0.303951	0.185897			75.5173	0.354354	0.194969			68.1931	0.348348	0.207547			72.1052	0.240122	0.153846
			65.4696	0.617021	0.410256															70.0256	0.300912	0.185897			75.7427	0.351351	0.194969			68.2128	0.345345	0.207547			72.131	0.237082	0.153846
			65.6921	0.613982	0.410256															70.05	0.300912	0.179487			75.979	0.348348	0.194969			68.2788	0.345345	0.201258			72.1345	0.234043	0.153846
			65.8195	0.610942	0.410256															70.0943	0.297872	0.179487			76.0625	0.348348	0.188679			68.3952	0.342342	0.201258			72.1501	0.231003	0.153846
			65.853	0.607903	0.410256															70.1503	0.294833	0.179487			76.0894	0.345345	0.188679			68.4742	0.339339	0.201258			72.248	0.227964	0.153846
			66.0284	0.607903	0.403846															70.1857	0.294833	0.173077			76.1076	0.342342	0.188679			68.5452	0.336336	0.201258			72.3396	0.224924	0.153846
			66.2983	0.604863	0.403846															70.2549	0.294833	0.166667			76.1994	0.339339	0.188679			68.6357	0.333333	0.201258			72.3497	0.224924	0.147436
			66.4256	0.601824	0.403846															70.3677	0.294833	0.160256			76.3208	0.339339	0.18239			68.6928	0.33033	0.201258			72.3639	0.221884	0.147436
			66.4649	0.601824	0.397436															70.4412	0.291793	0.160256			76.3928	0.336336	0.18239			68.7179	0.327327	0.201258			72.5549	0.218845	0.147436
			66.549	0.601824	0.391026															70.5531	0.288754	0.160256			76.5425	0.333333	0.18239			68.7919	0.324324	0.201258			72.7416	0.218845	0.141026
			66.6553	0.598784	0.391026															70.6726	0.285714	0.160256			76.7326	0.33033	0.18239			68.8655	0.324324	0.194969			72.7515	0.218845	0.134615
			66.7205	0.595745	0.391026															70.705	0.285714	0.153846			76.8595	0.327327	0.18239			68.8913	0.321321	0.194969			72.7587	0.218845	0.128205
			66.7838	0.595745	0.384615															70.7288	0.282675	0.153846			76.9582	0.324324	0.18239			68.9166	0.321321	0.188679			72.8438	0.215805	0.128205
			66.8484	0.592705	0.384615															70.8203	0.279635	0.153846			77.1252	0.324324	0.176101			68.9408	0.318318	0.188679			72.9614	0.212766	0.128205
			66.992	0.589666	0.384615															70.9537	0.276596	0.153846			77.2589	0.321321	0.176101			69.0837	0.315315	0.188679			73.0297	0.212766	0.121795
			67.2384	0.586626	0.384615															71.0251	0.273556	0.153846			77.3216	0.321321	0.169811			69.4544	0.312312	0.188679			73.133	0.212766	0.115385
			67.3711	0.583587	0.384615															71.0929	0.270517	0.153846			77.4235	0.318318	0.169811			69.711	0.312312	0.18239			73.2588	0.212766	0.108974
			67.502	0.580547	0.384615															71.1908	0.267477	0.153846			77.4677	0.315315	0.169811			69.8046	0.309309	0.18239			73.3496	0.209726	0.108974
			67.622	0.580547	0.378205															71.2917	0.264438	0.153846			77.5199	0.312312	0.169811			69.8951	0.306306	0.18239			73.4344	0.206687	0.108974
			67.6565	0.577508	0.378205															71.4544	0.261398	0.153846			77.5766	0.309309	0.169811			69.9621	0.303303	0.18239			73.5247	0.203647	0.108974
			67.7052	0.574468	0.378205															71.5853	0.258359	0.153846			77.6452	0.306306	0.169811			70.0256	0.3003	0.18239			73.5754	0.203647	0.102564
			67.7419	0.574468	0.371795															71.6185	0.255319	0.153846			77.7631	0.303303	0.169811			70.05	0.3003	0.176101			73.6342	0.200608	0.102564
			67.8016	0.571429	0.371795															71.6266	0.25228	0.153846			77.819	0.3003	0.169811			70.0943	0.297297	0.176101			73.6906	0.197568	0.102564
			67.8666	0.568389	0.371795															71.6491	0.24924	0.153846			77.8532	0.3003	0.163522			70.1503	0.294294	0.176101			73.834	0.194529	0.102564
			67.8903	0.56535	0.371795															71.7671	0.246201	0.153846			77.8913	0.297297	0.163522			70.1857	0.294294	0.169811			74.0341	0.191489	0.102564
			67.959	0.56535	0.365385															71.9743	0.243161	0.153846			77.899	0.294294	0.163522			70.2549	0.294294	0.163522			74.116	0.191489	0.0961538
			68.1188	0.56535	0.358974															72.1052	0.240122	0.153846			77.9226	0.294294	0.157233			70.3677	0.294294	0.157233			74.1975	0.18845	0.0961538
			68.2524	0.56535	0.352564															72.131	0.237082	0.153846			77.963	0.294294	0.150943			70.4412	0.291291	0.157233			74.4361	0.18541	0.0961538
			68.299	0.56231	0.352564															72.1345	0.234043	0.153846			78.0765	0.294294	0.144654			70.5531	0.288288	0.157233			74.6194	0.182371	0.0961538
			68.3302	0.559271	0.352564															72.1501	0.231003	0.153846			78.2782	0.294294	0.138365			70.6726	0.285285	0.157233			74.6316	0.179331	0.0961538
			68.3908	0.556231	0.352564															72.248	0.227964	0.153846			78.5855	0.291291	0.138365			70.705	0.285285	0.150943			74.7219	0.176292	0.0961538
			68.5134	0.556231	0.346154															72.3396	0.224924	0.153846			78.7917	0.288288	0.138365			70.7288	0.282282	0.150943			74.8904	0.173252	0.0961538
			68.6136	0.556231	0.339744															72.3497	0.224924	0.147436			78.8349	0.285285	0.138365			70.8203	0.279279	0.150943			75.073	0.173252	0.0897436
			68.7168	0.553191	0.339744															72.3639	0.221884	0.147436			78.8792	0.285285	0.132075			70.9537	0.276276	0.150943			75.2297	0.170213	0.0897436
			68.8108	0.550152	0.339744															72.5549	0.218845	0.147436			78.9697	0.282282	0.132075			71.0251	0.273273	0.150943			75.4092	0.170213	0.0833333
			68.8207	0.547112	0.339744															72.7416	0.218845	0.141026			79.0611	0.279279	0.132075			71.0929	0.27027	0.150943			75.5334	0.167173	0.0833333
			68.8859	0.547112	0.333333															72.7515	0.218845	0.134615			79.0809	0.276276	0.132075			71.1908	0.267267	0.150943			75.5486	0.164134	0.0833333
			68.9668	0.547112	0.326923															72.7587	0.218845	0.128205			79.0946	0.273273	0.132075			71.2917	0.264264	0.150943			75.5889	0.161094	0.0833333
			69.0076	0.544073	0.326923															72.8438	0.215805	0.128205			79.1478	0.273273	0.125786			71.4544	0.261261	0.150943			75.6511	0.158055	0.0833333
			69.0345	0.541033	0.326923															72.9614	0.212766	0.128205			79.2226	0.27027	0.125786			71.5853	0.258258	0.150943			75.7568	0.155015	0.0833333
			69.0518	0.537994	0.326923															73.0297	0.212766	0.121795			79.2736	0.267267	0.125786			71.6185	0.255255	0.150943			75.9016	0.155015	0.0769231
			69.1225	0.534954	0.326923															73.133	0.212766	0.115385			79.3091	0.264264	0.125786			71.6266	0.252252	0.150943			76.0567	0.151976	0.0769231
			69.2153	0.534954	0.320513															73.2588	0.212766	0.108974			79.3242	0.261261	0.125786			71.6491	0.249249	0.150943			76.1695	0.148936	0.0769231
			69.2822	0.531915	0.320513															73.3496	0.209726	0.108974			79.332	0.258258	0.125786			71.7671	0.246246	0.150943			76.2262	0.145897	0.0769231
			69.3369	0.531915	0.314103															73.4344	0.206687	0.108974			79.3381	0.255255	0.125786			71.9743	0.243243	0.150943			76.2771	0.142857	0.0769231
			69.3836	0.528875	0.314103															73.5247	0.203647	0.108974			79.3515	0.252252	0.125786			72.1052	0.24024	0.150943			76.4413	0.139818	0.0769231
			69.4249	0.525836	0.314103															73.5754	0.203647	0.102564			79.3754	0.249249	0.125786			72.131	0.237237	0.150943			76.6059	0.136778	0.0769231
			69.5751	0.522796	0.314103															73.6342	0.200608	0.102564			79.4068	0.249249	0.119497			72.1345	0.234234	0.150943			76.6666	0.133739	0.0769231
			69.7369	0.522796	0.307692															73.6906	0.197568	0.102564			79.4334	0.246246	0.119497			72.1501	0.231231	0.150943			76.7183	0.130699	0.0769231
			69.7852	0.522796	0.301282															73.834	0.194529	0.102564			79.4948	0.243243	0.119497			72.248	0.228228	0.150943			76.7787	0.12766	0.0769231
			69.8449	0.522796	0.294872															74.0341	0.191489	0.102564			79.5516	0.24024	0.119497			72.3396	0.225225	0.150943			76.9284	0.12766	0.0705128
			69.9431	0.519757	0.294872															74.116	0.191489	0.0961538			79.624	0.237237	0.119497			72.3497	0.225225	0.144654			77.1162	0.12462	0.0705128
			70.0542	0.516717	0.294872															74.1975	0.18845	0.0961538			79.6978	0.234234	0.119497			72.3639	0.222222	0.144654			77.3062	0.121581	0.0705128
			70.1701	0.513678	0.294872															74.4361	0.18541	0.0961538			79.7662	0.231231	0.119497			72.5549	0.219219	0.144654			77.4507	0.118541	0.0705128
			70.2362	0.510638	0.294872															74.6194	0.182371	0.0961538			79.8765	0.228228	0.119497			72.7416	0.219219	0.138365			77.5253	0.115502	0.0705128
			70.26	0.507599	0.294872															74.6316	0.179331	0.0961538			79.9634	0.225225	0.119497			72.7515	0.219219	0.132075			77.7	0.115502	0.0641026
			70.3222	0.504559	0.294872															74.7219	0.176292	0.0961538			80.0263	0.222222	0.119497			72.7587	0.219219	0.125786			77.8636	0.112462	0.0641026
			70.3706	0.50152	0.294872															74.8904	0.173252	0.0961538			80.1182	0.219219	0.119497			72.8438	0.216216	0.125786			78.0667	0.112462	0.0576923
			70.4315	0.49848	0.294872															75.073	0.173252	0.0897436			80.2003	0.216216	0.119497			72.9614	0.213213	0.125786			78.2846	0.109422	0.0576923
			70.4934	0.49848	0.288462															75.2297	0.170213	0.0897436			80.2859	0.213213	0.119497			73.0297	0.213213	0.119497			78.3803	0.106383	0.0576923
			70.5132	0.49848	0.282051															75.4092	0.170213	0.0833333			80.3764	0.21021	0.119497			73.133	0.213213	0.113208			78.4386	0.106383	0.0512821
			70.5303	0.49848	0.275641															75.5334	0.167173	0.0833333			80.4065	0.207207	0.119497			73.2588	0.213213	0.106918			78.5613	0.103343	0.0512821
			70.535	0.49848	0.269231															75.5486	0.164134	0.0833333			80.4576	0.204204	0.119497			73.3496	0.21021	0.106918			78.7462	0.103343	0.0448718
			70.5579	0.495441	0.269231															75.5889	0.161094	0.0833333			80.5124	0.201201	0.119497			73.4344	0.207207	0.106918			78.8457	0.100304	0.0448718
			70.585	0.492401	0.269231															75.6511	0.158055	0.0833333			80.5252	0.198198	0.119497			73.5247	0.204204	0.106918			78.9436	0.0972644	0.0448718
			70.7323	0.489362	0.269231															75.7568	0.155015	0.0833333			80.5691	0.195195	0.119497			73.5754	0.204204	0.100629			79.0667	0.0942249	0.0448718
			70.9374	0.486322	0.269231															75.9016	0.155015	0.0769231			80.6453	0.192192	0.119497			73.6342	0.201201	0.100629			79.2253	0.0911854	0.0448718
			71.0135	0.483283	0.269231															76.0567	0.151976	0.0769231			80.6831	0.192192	0.113208			73.6906	0.198198	0.100629			79.3395	0.0881459	0.0448718
			71.2143	0.480243	0.269231															76.1695	0.148936	0.0769231			80.6998	0.192192	0.106918			73.834	0.195195	0.100629			79.3705	0.0881459	0.0384615
			71.4652	0.477204	0.269231															76.2262	0.145897	0.0769231			80.7133	0.189189	0.106918			74.0341	0.192192	0.100629			79.3977	0.0851064	0.0384615
			71.529	0.477204	0.262821															76.2771	0.142857	0.0769231			80.7198	0.186186	0.106918			74.116	0.192192	0.0943396			79.4135	0.0820669	0.0384615
			71.5945	0.474164	0.262821															76.4413	0.139818	0.0769231			80.7501	0.183183	0.106918			74.1975	0.189189	0.0943396			79.4786	0.0820669	0.0320513
			71.6702	0.471125	0.262821															76.6059	0.136778	0.0769231			80.7771	0.18018	0.106918			74.4361	0.186186	0.0943396			79.6098	0.0820669	0.025641
			71.6948	0.468085	0.262821															76.6666	0.133739	0.0769231			80.8048	0.177177	0.106918			74.6194	0.183183	0.0943396			79.6907	0.0820669	0.0192308
			71.9029	0.465046	0.262821															76.7183	0.130699	0.0769231			80.8998	0.174174	0.106918			74.6316	0.18018	0.0943396			79.8171	0.0790274	0.0192308
			72.0975	0.462006	0.262821															76.7787	0.12766	0.0769231			81.0465	0.171171	0.106918			74.7219	0.177177	0.0943396			79.9456	0.0759878	0.0192308
			72.1429	0.458967	0.262821															76.9284	0.12766	0.0705128			81.1548	0.168168	0.106918			74.8904	0.174174	0.0943396			79.9785	0.0729483	0.0192308
			72.1995	0.455927	0.262821															77.1162	0.12462	0.0705128			81.198	0.168168	0.100629			75.073	0.174174	0.0880503			80.1611	0.0699088	0.0192308
			72.2268	0.452888	0.262821															77.3062	0.121581	0.0705128			81.2619	0.165165	0.100629			75.2297	0.171171	0.0880503			80.3511	0.0668693	0.0192308
			72.2703	0.449848	0.262821															77.4507	0.118541	0.0705128			81.3605	0.165165	0.0943396			75.4092	0.171171	0.081761			80.4329	0.0668693	0.0128205
			72.3321	0.446809	0.262821															77.5253	0.115502	0.0705128			81.443	0.165165	0.0880503			75.5334	0.168168	0.081761			80.5717	0.0638298	0.0128205
			72.3846	0.443769	0.262821															77.7	0.115502	0.0641026			81.519	0.165165	0.081761			75.5486	0.165165	0.081761			80.897	0.0607903	0.0128205
			72.432	0.440729	0.262821															77.8636	0.112462	0.0641026			81.6294	0.165165	0.0754717			75.5889	0.162162	0.081761			81.1788	0.0577508	0.0128205
			72.5646	0.43769	0.262821															78.0667	0.112462	0.0576923			81.706	0.162162	0.0754717			75.6511	0.159159	0.081761			81.3161	0.0547112	0.0128205
			72.6779	0.43465	0.262821															78.2846	0.109422	0.0576923			81.7266	0.159159	0.0754717			75.7568	0.156156	0.081761			81.4139	0.0516717	0.0128205
			72.7056	0.431611	0.262821															78.3803	0.106383	0.0576923			81.7433	0.156156	0.0754717			75.9016	0.156156	0.0754717			81.4339	0.0486322	0.0128205
			72.7307	0.431611	0.25641															78.4386	0.106383	0.0512821			81.8352	0.153153	0.0754717			76.0567	0.153153	0.0754717			81.4773	0.0455927	0.0128205
			72.742	0.428571	0.25641															78.5613	0.103343	0.0512821			81.9622	0.15015	0.0754717			76.1695	0.15015	0.0754717			81.7908	0.0455927	0.00641026
			72.7736	0.428571	0.25															78.7462	0.103343	0.0448718			82.0042	0.15015	0.0691824			76.2262	0.147147	0.0754717			82.1983	0.0425532	0.00641026
			72.9371	0.428571	0.24359															78.8457	0.100304	0.0448718			82.126	0.147147	0.0691824			76.2771	0.144144	0.0754717			82.6785	0.0395137	0.00641026
			73.0984	0.425532	0.24359															78.9436	0.0972644	0.0448718			82.3733	0.144144	0.0691824			76.4413	0.141141	0.0754717			83.149	0.0364742	0.00641026
			73.1369	0.422492	0.24359															79.0667	0.0942249	0.0448718			82.5184	0.141141	0.0691824			76.6059	0.138138	0.0754717			83.3863	0.0334347	0.00641026
			73.1837	0.422492	0.237179															79.2253	0.0911854	0.0448718			82.5935	0.138138	0.0691824			76.6666	0.135135	0.0754717			83.5524	0.0303951	0.00641026
			73.2308	0.419453	0.237179															79.3395	0.0881459	0.0448718			82.6546	0.135135	0.0691824			76.7183	0.132132	0.0754717			83.6004	0.0273556	0.00641026
			73.2868	0.416413	0.237179															79.3705	0.0881459	0.0384615			82.661	0.132132	0.0691824			76.7787	0.129129	0.0754717			84.1141	0.0273556	0
			73.3724	0.413374	0.237179															79.3977	0.0851064	0.0384615			82.7093	0.129129	0.0691824			76.9284	0.129129	0.0691824			84.6521	0.0243161	0
			73.4442	0.413374	0.230769															79.4135	0.0820669	0.0384615			82.756	0.126126	0.0691824			77.1162	0.126126	0.0691824			84.6872	0.0212766	0
			73.4992	0.410334	0.230769															79.4786	0.0820669	0.0320513			82.8666	0.123123	0.0691824			77.3062	0.123123	0.0691824			84.7266	0.0182371	0
			73.5439	0.407295	0.230769															79.6098	0.0820669	0.025641			82.9764	0.12012	0.0691824			77.4507	0.12012	0.0691824			84.7895	0.0151976	0
			73.6991	0.404255	0.230769															79.6907	0.0820669	0.0192308			82.983	0.117117	0.0691824			77.5253	0.117117	0.0691824			85.441	0.0121581	0
			73.9428	0.401216	0.230769															79.8171	0.0790274	0.0192308			82.9936	0.114114	0.0691824			77.7	0.117117	0.0628931			86.1989	0.00911854	0
			74.08	0.401216	0.224359															79.9456	0.0759878	0.0192308			83.0204	0.111111	0.0691824			77.8636	0.114114	0.0628931			87.4245	0.00607903	0
			74.1243	0.398176	0.224359															79.9785	0.0729483	0.0192308			83.0584	0.108108	0.0691824			78.0667	0.114114	0.0566038		FESC	88.8645	0.00303951	0
			74.1393	0.395137	0.224359															80.1611	0.0699088	0.0192308			83.1169	0.105105	0.0691824			78.2846	0.111111	0.0566038			90.2108	0	0
			74.1751	0.392097	0.224359															80.3511	0.0668693	0.0192308			83.1891	0.102102	0.0691824			78.3803	0.108108	0.0566038			3.44231	1	1
			74.2221	0.389058	0.224359															80.4329	0.0668693	0.0128205			83.2878	0.0990991	0.0691824			78.4386	0.108108	0.0503145			5.58287	1	0.99359
			74.2848	0.386018	0.224359															80.5717	0.0638298	0.0128205			83.3598	0.0960961	0.0691824			78.5613	0.105105	0.0503145			6.91747	0.99696	0.99359
			74.3637	0.386018	0.217949															80.897	0.0607903	0.0128205			83.4454	0.0930931	0.0691824			78.7462	0.105105	0.0440252			7.9764	0.99696	0.987179
			74.3935	0.386018	0.211538															81.1788	0.0577508	0.0128205			83.5962	0.0900901	0.0691824			78.8457	0.102102	0.0440252			8.91582	0.99696	0.980769
			74.4048	0.382979	0.211538															81.3161	0.0547112	0.0128205			83.6771	0.0870871	0.0691824			78.9436	0.0990991	0.0440252			9.19929	0.993921	0.980769
			74.4504	0.379939	0.211538															81.4139	0.0516717	0.0128205			83.7831	0.0840841	0.0691824			79.0667	0.0960961	0.0440252			9.45538	0.990881	0.980769
			74.6123	0.3769	0.211538															81.4339	0.0486322	0.0128205			83.931	0.0840841	0.0628931			79.2253	0.0930931	0.0440252			9.63843	0.990881	0.974359
			74.775	0.3769	0.205128															81.4773	0.0455927	0.0128205			84.0215	0.0840841	0.0566038			79.3395	0.0900901	0.0440252			10.2108	0.990881	0.967949
			74.8377	0.37386	0.205128															81.7908	0.0455927	0.00641026			84.1273	0.0810811	0.0566038			79.3705	0.0900901	0.0377358			10.6786	0.987842	0.967949
			74.9477	0.370821	0.205128															82.1983	0.0425532	0.00641026			84.2021	0.0780781	0.0566038			79.3977	0.0870871	0.0377358			10.7302	0.984802	0.967949
			75.0353	0.367781	0.205128															82.6785	0.0395137	0.00641026			84.2131	0.0750751	0.0566038			79.4135	0.0840841	0.0377358			10.8495	0.984802	0.961538
			75.0427	0.364742	0.205128															83.149	0.0364742	0.00641026			84.2455	0.0720721	0.0566038			79.4786	0.0840841	0.0314465			10.9692	0.984802	0.955128
			75.1787	0.364742	0.198718															83.3863	0.0334347	0.00641026			84.3286	0.0690691	0.0566038			79.6098	0.0840841	0.0251572			11.5662	0.984802	0.948718
			75.3286	0.361702	0.198718															83.5524	0.0303951	0.00641026			84.4607	0.0660661	0.0566038			79.6907	0.0840841	0.0188679			12.2395	0.984802	0.942308
			75.3728	0.358663	0.198718															83.6004	0.0273556	0.00641026			84.5707	0.0630631	0.0566038			79.8171	0.0810811	0.0188679			12.355	0.984802	0.935897
			75.4211	0.355623	0.198718															84.1141	0.0273556	0			84.6729	0.0600601	0.0566038			79.9456	0.0780781	0.0188679			12.906	0.984802	0.929487
			75.4556	0.355623	0.192308															84.6521	0.0243161	0			84.7791	0.0570571	0.0566038			79.9785	0.0750751	0.0188679			13.4813	0.984802	0.923077
			75.5173	0.352584	0.192308															84.6872	0.0212766	0			84.9688	0.0540541	0.0566038			80.1611	0.0720721	0.0188679			13.5523	0.984802	0.916667
			75.7427	0.349544	0.192308															84.7266	0.0182371	0			85.1903	0.0540541	0.0503145			80.3511	0.0690691	0.0188679			13.7226	0.981763	0.916667
			75.979	0.346505	0.192308															84.7895	0.0151976	0			85.346	0.0510511	0.0503145			80.4329	0.0690691	0.0125786			14.1014	0.981763	0.910256
			76.0625	0.346505	0.185897															85.441	0.0121581	0			85.486	0.048048	0.0503145			80.5717	0.0660661	0.0125786			14.6164	0.978723	0.910256
			76.0894	0.343465	0.185897															86.1989	0.00911854	0			85.614	0.045045	0.0503145			80.897	0.0630631	0.0125786			15.8921	0.978723	0.903846
			76.1076	0.340426	0.185897															87.4245	0.00607903	0			85.7805	0.042042	0.0503145			81.1788	0.0600601	0.0125786			17.2071	0.975684	0.903846
			76.1994	0.337386	0.185897														FESC	88.8645	0.00303951	0			85.94	0.042042	0.0440252			81.3161	0.0570571	0.0125786			17.5538	0.975684	0.897436
			76.3208	0.337386	0.179487															90.2108	0	0			86.2527	0.039039	0.0440252			81.4139	0.0540541	0.0125786			19.0975	0.975684	0.891026
			76.3928	0.334347	0.179487															3.44231	1	1			86.5821	0.039039	0.0377358			81.4339	0.0510511	0.0125786			20.8829	0.972644	0.891026
			76.5425	0.331307	0.179487															5.58287	1	0.99359			86.6747	0.039039	0.0314465			81.4773	0.048048	0.0125786			21.4074	0.969605	0.891026
			76.7326	0.328267	0.179487															6.91747	0.99696	0.99359			86.8172	0.039039	0.0251572			81.7908	0.048048	0.00628931			21.8444	0.969605	0.884615
			76.8595	0.325228	0.179487															7.9764	0.99696	0.987179			86.9911	0.036036	0.0251572			82.1983	0.045045	0.00628931			22.3845	0.969605	0.878205
			77.0867	0.322188	0.179487															8.91582	0.99696	0.980769			87.0547	0.033033	0.0251572			82.6785	0.042042	0.00628931			22.7945	0.969605	0.871795
			77.2589	0.319149	0.179487															9.19929	0.993921	0.980769			87.1196	0.033033	0.0188679			83.149	0.039039	0.00628931			23.2223	0.969605	0.865385
			77.3216	0.319149	0.173077															9.45538	0.990881	0.980769			87.3356	0.03003	0.0188679			83.3863	0.036036	0.00628931			23.7287	0.966565	0.865385
			77.4235	0.316109	0.173077															9.63843	0.990881	0.974359			87.7808	0.027027	0.0188679			83.5524	0.033033	0.00628931			24.5692	0.966565	0.858974
			77.4677	0.31307	0.173077															10.2108	0.990881	0.967949			88.1969	0.024024	0.0188679			83.6004	0.03003	0.00628931			25.2892	0.966565	0.852564
			77.5199	0.31003	0.173077															10.6786	0.987842	0.967949			88.5348	0.024024	0.0125786			84.1141	0.03003	0			25.3778	0.966565	0.846154
			77.5766	0.306991	0.173077															10.7302	0.984802	0.967949			88.8809	0.024024	0.00628931			84.6521	0.027027	0			25.6012	0.966565	0.839744
			77.6452	0.303951	0.173077															10.8495	0.984802	0.961538			89.4839	0.021021	0.00628931			84.6872	0.024024	0			25.7625	0.966565	0.833333
			77.7631	0.300912	0.173077															10.9692	0.984802	0.955128			90.2777	0.018018	0.00628931			84.7266	0.021021	0			25.8475	0.966565	0.826923
			77.819	0.297872	0.173077															11.5662	0.984802	0.948718			90.9243	0.015015	0.00628931			84.7895	0.018018	0			26.118	0.966565	0.820513
			77.8532	0.297872	0.166667															12.2395	0.984802	0.942308			91.3415	0.012012	0.00628931			85.441	0.015015	0			26.3268	0.963526	0.820513
			77.8913	0.294833	0.166667															12.355	0.984802	0.935897			91.6201	0.00900901	0.00628931			86.1989	0.012012	0			26.7406	0.960486	0.820513
			77.899	0.291793	0.166667															12.906	0.984802	0.929487			91.9963	0.00900901	0			87.4245	0.00900901	0			27.9068	0.957447	0.820513
			77.9226	0.291793	0.160256															13.4813	0.984802	0.923077			92.3577	0.00600601	0			88.7413	0.00600601	0			28.7501	0.957447	0.814103
			77.963	0.291793	0.153846															13.5523	0.984802	0.916667			92.6009	0.003003	0			89.0876	0.003003	0			29.0483	0.957447	0.807692
			78.0765	0.291793	0.147436															13.7226	0.981763	0.916667		acr倒数	93.6959	0	0		acr倒数	90.2108	0	0			29.3338	0.954407	0.807692
			78.2782	0.291793	0.141026															14.1014	0.981763	0.910256			-1	1	1			-1	1	1			29.4223	0.954407	0.801282
			78.5855	0.288754	0.141026															14.6164	0.978723	0.910256			3.22414e-05	0.984985	1			3.22414e-05	0.984985	1			29.51	0.951368	0.801282
			78.7917	0.285714	0.141026															15.8921	0.978723	0.903846			0.000105006	0.984985	0.993711			0.000105006	0.984985	0.993711			29.7702	0.951368	0.794872
			78.8349	0.282675	0.141026															17.2071	0.975684	0.903846			0.000151681	0.984985	0.987421			0.000151681	0.984985	0.987421			29.9985	0.948328	0.794872
			78.8792	0.282675	0.134615															17.5538	0.975684	0.897436			0.000177549	0.984985	0.981132			0.000177549	0.984985	0.981132			30.2696	0.945289	0.794872
			78.9697	0.279635	0.134615															19.0975	0.975684	0.891026			0.000211001	0.984985	0.974843			0.000211001	0.984985	0.974843			30.6066	0.942249	0.794872
			79.0611	0.276596	0.134615															20.8829	0.972644	0.891026			0.000226668	0.984985	0.968553			0.000226668	0.984985	0.968553			30.7505	0.93921	0.794872
			79.0809	0.273556	0.134615															21.4074	0.969605	0.891026			0.00023364	0.984985	0.962264			0.00023364	0.984985	0.962264			30.8955	0.93617	0.794872
			79.0946	0.270517	0.134615															21.8444	0.969605	0.884615			0.000261918	0.984985	0.955975			0.000261918	0.984985	0.955975			31.3378	0.933131	0.794872
			79.1478	0.270517	0.128205															22.3845	0.969605	0.878205			0.000293875	0.984985	0.949686			0.000293875	0.984985	0.949686			31.6762	0.930091	0.794872
			79.2226	0.267477	0.128205															22.7945	0.969605	0.871795			0.000313732	0.984985	0.943396			0.000313732	0.984985	0.943396			31.8533	0.927052	0.794872
			79.2736	0.264438	0.128205															23.2223	0.969605	0.865385			0.000340306	0.984985	0.937107			0.000340306	0.984985	0.937107			32.1464	0.927052	0.788462
			79.3091	0.261398	0.128205															23.7287	0.966565	0.865385			0.000371707	0.984985	0.930818			0.000371707	0.984985	0.930818			32.7278	0.927052	0.782051
			79.3242	0.258359	0.128205															24.5692	0.966565	0.858974			0.000393499	0.984985	0.924528			0.000393499	0.984985	0.924528			33.5193	0.927052	0.775641
			79.332	0.255319	0.128205															25.2892	0.966565	0.852564			0.000401745	0.984985	0.918239			0.000401745	0.984985	0.918239			33.8829	0.927052	0.769231
			79.3381	0.25228	0.128205															25.3778	0.966565	0.846154			0.00041776	0.984985	0.91195			0.00041776	0.984985	0.91195			33.9496	0.927052	0.762821
			79.3515	0.24924	0.128205															25.6012	0.966565	0.839744			0.000432186	0.984985	0.90566			0.000432186	0.984985	0.90566			34.1266	0.924012	0.762821
			79.3754	0.246201	0.128205															25.7625	0.966565	0.833333			0.00043443	0.984985	0.899371			0.00043443	0.984985	0.899371			34.2839	0.924012	0.75641
			79.4068	0.246201	0.121795															25.8475	0.966565	0.826923			0.000439542	0.984985	0.893082			0.000439542	0.984985	0.893082			34.3483	0.920973	0.75641
			79.4334	0.243161	0.121795															26.118	0.966565	0.820513			0.000459135	0.984985	0.886792			0.000459135	0.984985	0.886792			34.4629	0.917933	0.75641
			79.4948	0.240122	0.121795															26.3268	0.963526	0.820513			0.000516154	0.984985	0.880503			0.000516154	0.984985	0.880503			34.6869	0.914894	0.75641
			79.5516	0.237082	0.121795															26.7406	0.960486	0.820513			0.000574693	0.984985	0.874214			0.000574693	0.984985	0.874214			34.9357	0.914894	0.75
			79.624	0.234043	0.121795															27.9068	0.957447	0.820513			0.000611491	0.984985	0.867925			0.000611491	0.984985	0.867925			35.0814	0.911854	0.75
			79.6978	0.231003	0.121795															28.7501	0.957447	0.814103			0.000646818	0.984985	0.861635			0.000646818	0.984985	0.861635			35.7413	0.908815	0.75
			79.7662	0.227964	0.121795															29.0483	0.957447	0.807692			0.000664481	0.984985	0.855346			0.000664481	0.984985	0.855346			36.409	0.905775	0.75
			79.8765	0.224924	0.121795															29.3338	0.954407	0.807692			0.000673928	0.984985	0.849057			0.000673928	0.984985	0.849057			36.6365	0.902736	0.75
			79.9634	0.221884	0.121795															29.4223	0.954407	0.801282			0.000720112	0.984985	0.842767			0.000720112	0.984985	0.842767			37.1046	0.899696	0.75
			80.0263	0.218845	0.121795															29.51	0.951368	0.801282			0.000774604	0.984985	0.836478			0.000774604	0.984985	0.836478			37.5176	0.899696	0.74359
			80.1182	0.215805	0.121795															29.7702	0.951368	0.794872			0.000812705	0.984985	0.830189			0.000812705	0.984985	0.830189			37.8485	0.896657	0.74359
			80.2003	0.212766	0.121795															29.9985	0.948328	0.794872			0.000850993	0.984985	0.823899			0.000850993	0.984985	0.823899			38.3123	0.896657	0.737179
			80.2859	0.209726	0.121795															30.2696	0.945289	0.794872			0.000878684	0.984985	0.81761			0.000878684	0.984985	0.81761			39.0661	0.896657	0.730769
			80.3764	0.206687	0.121795															30.6066	0.942249	0.794872			0.000894754	0.984985	0.811321			0.000894754	0.984985	0.811321			39.7245	0.896657	0.724359
			80.4065	0.203647	0.121795															30.7505	0.93921	0.794872			0.000910735	0.984985	0.805031			0.000910735	0.984985	0.805031			39.8793	0.896657	0.717949
			80.4576	0.200608	0.121795															30.8955	0.93617	0.794872			0.000988169	0.984985	0.798742			0.000988169	0.984985	0.798742			40.0948	0.893617	0.717949
			80.5124	0.197568	0.121795															31.3378	0.933131	0.794872			0.00106943	0.984985	0.792453			0.00106943	0.984985	0.792453			40.3516	0.890578	0.717949
			80.5252	0.194529	0.121795															31.6762	0.930091	0.794872			0.00113399	0.984985	0.786164			0.00113399	0.984985	0.786164			40.5137	0.890578	0.711538
			80.5691	0.191489	0.121795															31.8533	0.927052	0.794872			0.00118495	0.984985	0.779874			0.00118495	0.984985	0.779874			40.893	0.890578	0.705128
			80.6453	0.18845	0.121795															32.1464	0.927052	0.788462			0.00120886	0.984985	0.773585			0.00120886	0.984985	0.773585			41.5287	0.887538	0.705128
			80.6831	0.18845	0.115385															32.7278	0.927052	0.782051			0.00126432	0.984985	0.767296			0.00126432	0.984985	0.767296			41.9215	0.884498	0.705128
			80.6998	0.18845	0.108974															33.5193	0.927052	0.775641			0.00137227	0.984985	0.761006			0.00137227	0.984985	0.761006			41.9634	0.884498	0.698718
			80.7133	0.18541	0.108974															33.8829	0.927052	0.769231			0.00149843	0.984985	0.754717			0.00149843	0.984985	0.754717			42.089	0.881459	0.698718
			80.7198	0.182371	0.108974															33.9496	0.927052	0.762821			0.00158582	0.984985	0.748428			0.00158582	0.984985	0.748428			42.2717	0.878419	0.698718
			80.7501	0.179331	0.108974															34.1266	0.924012	0.762821			0.00168595	0.984985	0.742138			0.00168595	0.984985	0.742138			42.3784	0.878419	0.692308
			80.7771	0.176292	0.108974															34.2839	0.924012	0.75641			0.0017564	0.984985	0.735849			0.0017564	0.984985	0.735849			42.5136	0.878419	0.685897
			80.8048	0.173252	0.108974															34.3483	0.920973	0.75641			0.00177573	0.984985	0.72956			0.00177573	0.984985	0.72956			42.6122	0.87538	0.685897
			80.8998	0.170213	0.108974															34.4629	0.917933	0.75641			0.00189496	0.984985	0.72327			0.00189496	0.984985	0.72327			42.7581	0.87538	0.679487
			81.0465	0.167173	0.108974															34.6869	0.914894	0.75641			0.00204616	0.984985	0.716981			0.00204616	0.984985	0.716981			42.9796	0.87234	0.679487
			81.1548	0.164134	0.108974															34.9357	0.914894	0.75			0.00213784	0.984985	0.710692			0.00213784	0.984985	0.710692			43.0578	0.87234	0.673077
			81.198	0.164134	0.102564															35.0814	0.911854	0.75			0.00220929	0.984985	0.704403			0.00220929	0.984985	0.704403			43.1293	0.87234	0.666667
			81.2619	0.161094	0.102564															35.7413	0.908815	0.75			0.00224632	0.981982	0.704403			0.00224632	0.981982	0.704403			43.2252	0.87234	0.660256
			81.3605	0.161094	0.0961538															36.409	0.905775	0.75			0.00237746	0.978979	0.704403			0.00237746	0.978979	0.704403			43.4629	0.87234	0.653846
			81.443	0.161094	0.0897436															36.6365	0.902736	0.75			0.00251861	0.978979	0.698113			0.00251861	0.978979	0.698113			43.8463	0.869301	0.653846
			81.519	0.161094	0.0833333															37.1046	0.899696	0.75			0.00267719	0.978979	0.691824			0.00267719	0.978979	0.691824			44.0911	0.869301	0.647436
			81.6294	0.161094	0.0769231															37.5176	0.899696	0.74359			0.00281563	0.975976	0.691824			0.00281563	0.975976	0.691824			44.2078	0.866261	0.647436
			81.706	0.158055	0.0769231															37.8485	0.896657	0.74359			0.00298831	0.972973	0.691824			0.00298831	0.972973	0.691824			44.3439	0.863222	0.647436
			81.7266	0.155015	0.0769231															38.3123	0.896657	0.737179			0.00335728	0.972973	0.685535			0.00335728	0.972973	0.685535			44.522	0.863222	0.641026
			81.7433	0.151976	0.0769231															39.0661	0.896657	0.730769			0.00357111	0.972973	0.679245			0.00357111	0.972973	0.679245			44.7341	0.860182	0.641026
			81.8352	0.148936	0.0769231															39.7245	0.896657	0.724359			0.00359358	0.972973	0.672956			0.00359358	0.972973	0.672956			44.9194	0.857143	0.641026
			81.9622	0.145897	0.0769231															39.8793	0.896657	0.717949			0.00361112	0.972973	0.666667			0.00361112	0.972973	0.666667			45.0455	0.854103	0.641026
			82.0042	0.145897	0.0705128															40.0948	0.893617	0.717949			0.00367211	0.972973	0.660377			0.00367211	0.972973	0.660377			45.5085	0.851064	0.641026
			82.126	0.142857	0.0705128															40.3516	0.890578	0.717949			0.003835	0.972973	0.654088			0.003835	0.972973	0.654088			45.9224	0.851064	0.634615
			82.3733	0.139818	0.0705128															40.5137	0.890578	0.711538			0.00394914	0.972973	0.647799			0.00394914	0.972973	0.647799			46.0014	0.851064	0.628205
			82.5184	0.136778	0.0705128															40.893	0.890578	0.705128			0.00399873	0.972973	0.641509			0.00399873	0.972973	0.641509			46.0813	0.848024	0.628205
			82.5935	0.133739	0.0705128															41.5287	0.887538	0.705128			0.00405426	0.972973	0.63522			0.00405426	0.972973	0.63522			46.163	0.844985	0.628205
			82.6546	0.130699	0.0705128															41.9215	0.884498	0.705128			0.00410926	0.96997	0.63522			0.00410926	0.96997	0.63522			46.6189	0.841945	0.628205
			82.661	0.12766	0.0705128															41.9634	0.884498	0.698718			0.00428583	0.96997	0.628931			0.00428583	0.96997	0.628931			47.0904	0.838906	0.628205
			82.7093	0.12462	0.0705128															42.089	0.881459	0.698718			0.00445591	0.96997	0.622642			0.00445591	0.96997	0.622642			47.2796	0.835866	0.628205
			82.756	0.121581	0.0705128															42.2717	0.878419	0.698718			0.00451958	0.96997	0.616352			0.00451958	0.96997	0.616352			47.5656	0.835866	0.621795
			82.8666	0.118541	0.0705128															42.3784	0.878419	0.692308			0.00463882	0.96997	0.610063			0.00463882	0.96997	0.610063			47.7706	0.835866	0.615385
			82.9764	0.115502	0.0705128															42.5136	0.878419	0.685897			0.00474849	0.96997	0.603774			0.00474849	0.96997	0.603774			47.8596	0.832827	0.615385
			82.983	0.112462	0.0705128															42.6122	0.87538	0.685897			0.00484328	0.96997	0.597484			0.00484328	0.96997	0.597484			47.9779	0.832827	0.608974
			82.9936	0.109422	0.0705128															42.7581	0.87538	0.679487			0.00499718	0.96997	0.591195			0.00499718	0.96997	0.591195			48.2737	0.832827	0.602564
			83.0204	0.106383	0.0705128															42.9796	0.87234	0.679487			0.00517338	0.96997	0.584906			0.00517338	0.96997	0.584906			48.5681	0.829787	0.602564
			83.0584	0.103343	0.0705128															43.0578	0.87234	0.673077			0.00531175	0.96997	0.578616			0.00531175	0.96997	0.578616			48.8125	0.826748	0.602564
			83.1169	0.100304	0.0705128															43.1293	0.87234	0.666667			0.0053506	0.96997	0.572327			0.0053506	0.96997	0.572327			49.1446	0.826748	0.596154
			83.1891	0.0972644	0.0705128															43.2252	0.87234	0.660256			0.00540693	0.966967	0.572327			0.00540693	0.966967	0.572327			49.3834	0.823708	0.596154
			83.2878	0.0942249	0.0705128															43.4629	0.87234	0.653846			0.00562576	0.966967	0.566038			0.00562576	0.966967	0.566038			49.4846	0.820669	0.596154
			83.3598	0.0911854	0.0705128															43.8463	0.869301	0.653846			0.00591571	0.966967	0.559748			0.00591571	0.966967	0.559748			49.5013	0.817629	0.596154
			83.4454	0.0881459	0.0705128															44.0911	0.869301	0.647436			0.00617169	0.966967	0.553459			0.00617169	0.966967	0.553459			49.6366	0.817629	0.589744
			83.5962	0.0851064	0.0705128															44.2078	0.866261	0.647436			0.00630557	0.966967	0.54717			0.00630557	0.966967	0.54717			50.5227	0.81459	0.589744
			83.6771	0.0820669	0.0705128															44.3439	0.863222	0.647436			0.00637006	0.966967	0.540881			0.00637006	0.966967	0.540881			51.4805	0.81459	0.583333
			83.7831	0.0790274	0.0705128															44.522	0.863222	0.641026			0.00655602	0.966967	0.534591			0.00655602	0.966967	0.534591			51.724	0.81155	0.583333
			83.931	0.0790274	0.0641026															44.7341	0.860182	0.641026			0.00679453	0.966967	0.528302			0.00679453	0.966967	0.528302			51.9943	0.808511	0.583333
			84.0215	0.0790274	0.0576923															44.9194	0.857143	0.641026			0.00701315	0.966967	0.522013			0.00701315	0.966967	0.522013			52.2496	0.805471	0.583333
			84.1339	0.0759878	0.0576923															45.0455	0.854103	0.641026			0.00714425	0.966967	0.515723			0.00714425	0.966967	0.515723			52.6018	0.802432	0.583333
			84.2131	0.0729483	0.0576923															45.5085	0.851064	0.641026			0.00720135	0.966967	0.509434			0.00720135	0.966967	0.509434			52.9555	0.799392	0.583333
			84.2455	0.0699088	0.0576923															45.9224	0.851064	0.634615			0.00730947	0.966967	0.503145			0.00730947	0.966967	0.503145			53.0692	0.796353	0.583333
			84.3286	0.0668693	0.0576923															46.0014	0.851064	0.628205			0.00749755	0.966967	0.496855			0.00749755	0.966967	0.496855			53.2326	0.793313	0.583333
			84.4607	0.0638298	0.0576923															46.0813	0.848024	0.628205			0.00766953	0.963964	0.496855			0.00766953	0.963964	0.496855			53.4339	0.790274	0.583333
			84.5707	0.0607903	0.0576923															46.163	0.844985	0.628205			0.00774385	0.963964	0.490566			0.00774385	0.963964	0.490566			53.6758	0.790274	0.576923
			84.6729	0.0577508	0.0576923															46.6189	0.841945	0.628205			0.00786949	0.963964	0.484277			0.00786949	0.963964	0.484277			53.9256	0.787234	0.576923
			84.7791	0.0547112	0.0576923															47.0904	0.838906	0.628205			0.0080055	0.960961	0.484277			0.0080055	0.960961	0.484277			54.1702	0.784195	0.576923
			84.9688	0.0516717	0.0576923															47.2796	0.835866	0.628205			0.00808846	0.957958	0.484277			0.00808846	0.957958	0.484277			54.3461	0.781155	0.576923
			85.1903	0.0516717	0.0512821															47.5656	0.835866	0.621795			0.00823922	0.957958	0.477987			0.00823922	0.957958	0.477987			54.5748	0.781155	0.570513
			85.346	0.0486322	0.0512821															47.7706	0.835866	0.615385			0.00836133	0.957958	0.471698			0.00836133	0.957958	0.471698			54.8799	0.781155	0.564103
			85.486	0.0455927	0.0512821															47.8596	0.832827	0.615385			0.00842614	0.957958	0.465409			0.00842614	0.957958	0.465409			55.0368	0.778116	0.564103
			85.614	0.0425532	0.0512821															47.9779	0.832827	0.608974			0.00847894	0.957958	0.459119			0.00847894	0.957958	0.459119			55.0612	0.778116	0.557692
			85.7805	0.0395137	0.0512821															48.2737	0.832827	0.602564			0.00850884	0.957958	0.45283			0.00850884	0.957958	0.45283			55.2148	0.775076	0.557692
			85.94	0.0395137	0.0448718															48.5681	0.829787	0.602564			0.00861359	0.957958	0.446541			0.00861359	0.957958	0.446541			55.4973	0.772036	0.557692
			86.2527	0.0364742	0.0448718															48.8125	0.826748	0.602564			0.00895277	0.957958	0.440252			0.00895277	0.957958	0.440252			55.7185	0.768997	0.557692
			86.5821	0.0364742	0.0384615															49.1446	0.826748	0.596154			0.00936094	0.957958	0.433962			0.00936094	0.957958	0.433962			55.8783	0.765957	0.557692
			86.6747	0.0364742	0.0320513															49.3834	0.823708	0.596154			0.00967103	0.957958	0.427673			0.00967103	0.957958	0.427673			55.9499	0.765957	0.551282
			86.8172	0.0364742	0.025641															49.4846	0.820669	0.596154			0.00984454	0.957958	0.421384			0.00984454	0.957958	0.421384			55.9564	0.762918	0.551282
			86.9911	0.0334347	0.025641															49.5013	0.817629	0.596154			0.00989172	0.957958	0.415094			0.00989172	0.957958	0.415094			55.976	0.759878	0.551282
			87.0547	0.0303951	0.025641															49.6366	0.817629	0.589744			0.0099554	0.957958	0.408805			0.0099554	0.957958	0.408805			56.0868	0.756839	0.551282
			87.1196	0.0303951	0.0192308															50.5227	0.81459	0.589744			0.0100413	0.936937	0.408805			0.0100413	0.936937	0.408805			56.1886	0.756839	0.544872
			87.3356	0.0273556	0.0192308															51.4805	0.81459	0.583333			0.0101949	0.936937	0.402516			0.0101949	0.936937	0.402516			56.3376	0.756839	0.538462
			87.7808	0.0243161	0.0192308															51.724	0.81155	0.583333			0.0105012	0.936937	0.396226			0.0105012	0.936937	0.396226			56.6895	0.753799	0.538462
			88.1969	0.0212766	0.0192308															51.9943	0.808511	0.583333			0.0108829	0.936937	0.389937			0.0108829	0.936937	0.389937			56.9325	0.75076	0.538462
			88.5348	0.0212766	0.0128205															52.2496	0.805471	0.583333			0.0113573	0.936937	0.383648			0.0113573	0.936937	0.383648			57.1396	0.74772	0.538462
			88.8809	0.0212766	0.00641026															52.6018	0.802432	0.583333			0.0117681	0.933934	0.383648			0.0117681	0.933934	0.383648			57.3449	0.744681	0.538462
			89.4839	0.0182371	0.00641026															52.9555	0.799392	0.583333			0.0119563	0.933934	0.377358			0.0119563	0.933934	0.377358			57.4004	0.744681	0.532051
			90.2777	0.0151976	0.00641026															53.0692	0.796353	0.583333			0.0122207	0.933934	0.371069			0.0122207	0.933934	0.371069			57.4865	0.744681	0.525641
			90.9243	0.0121581	0.00641026															53.2326	0.793313	0.583333			0.0127022	0.930931	0.371069			0.0127022	0.930931	0.371069			57.6593	0.744681	0.519231
			91.3415	0.00911854	0.00641026															53.4339	0.790274	0.583333			0.0130466	0.927928	0.371069			0.0130466	0.927928	0.371069			57.8707	0.741641	0.519231
			91.6201	0.00607903	0.00641026															53.6758	0.790274	0.576923			0.0132268	0.927928	0.36478			0.0132268	0.927928	0.36478			58.0231	0.738602	0.519231
			91.9963	0.00607903	0															53.9256	0.787234	0.576923			0.0135045	0.927928	0.358491			0.0135045	0.927928	0.358491			58.1309	0.738602	0.512821
		acr倒数	92.4526	0.00303951	0															54.1702	0.784195	0.576923			0.0136978	0.927928	0.352201			0.0136978	0.927928	0.352201			58.2527	0.735562	0.512821
			93.6959	0	0															54.3461	0.781155	0.576923			0.0147269	0.927928	0.345912			0.0147269	0.927928	0.345912			58.448	0.735562	0.50641
			-1	1	1															54.5748	0.781155	0.570513			0.0157543	0.927928	0.339623			0.0157543	0.927928	0.339623			58.5904	0.735562	0.5
			3.22414e-05	0.984802	1															54.8799	0.781155	0.564103			0.0159533	0.927928	0.333333			0.0159533	0.927928	0.333333			58.664	0.732523	0.5
			0.000105006	0.984802	0.99359															55.0368	0.778116	0.564103			0.0162829	0.927928	0.327044			0.0162829	0.927928	0.327044			58.7733	0.729483	0.5
			0.000151681	0.984802	0.987179															55.0612	0.778116	0.557692			0.0165321	0.927928	0.320755			0.0165321	0.927928	0.320755			58.8388	0.726444	0.5
			0.000177549	0.984802	0.980769															55.2148	0.775076	0.557692			0.0168583	0.927928	0.314465			0.0168583	0.927928	0.314465			58.8588	0.723404	0.5
			0.000211001	0.984802	0.974359															55.4973	0.772036	0.557692			0.0171175	0.927928	0.308176			0.0171175	0.927928	0.308176			59.0214	0.723404	0.49359
			0.000226668	0.984802	0.967949															55.7185	0.768997	0.557692			0.0172813	0.927928	0.301887			0.0172813	0.927928	0.301887			59.2135	0.720365	0.49359
			0.00023364	0.984802	0.961538															55.8783	0.765957	0.557692			0.0174353	0.927928	0.295597			0.0174353	0.927928	0.295597			59.3243	0.720365	0.487179
			0.000261918	0.984802	0.955128															55.9499	0.765957	0.551282			0.0175335	0.927928	0.289308			0.0175335	0.927928	0.289308			59.5106	0.717325	0.487179
			0.000293875	0.984802	0.948718															55.9564	0.762918	0.551282			0.0176336	0.927928	0.283019			0.0176336	0.927928	0.283019			59.6995	0.714286	0.487179
			0.000313732	0.984802	0.942308															55.976	0.759878	0.551282			0.0176679	0.927928	0.27673			0.0176679	0.927928	0.27673			59.927	0.711246	0.487179
			0.000340306	0.984802	0.935897															56.0868	0.756839	0.551282			0.0180853	0.927928	0.27044			0.0180853	0.927928	0.27044			60.1618	0.708207	0.487179
			0.000371707	0.984802	0.929487															56.1886	0.756839	0.544872			0.018498	0.927928	0.264151			0.018498	0.927928	0.264151			60.3092	0.705167	0.487179
			0.000393499	0.984802	0.923077															56.3376	0.756839	0.538462			0.0185929	0.927928	0.257862			0.0185929	0.927928	0.257862			60.4207	0.702128	0.487179
			0.000401745	0.984802	0.916667															56.6895	0.753799	0.538462			0.0188212	0.927928	0.251572			0.0188212	0.927928	0.251572			60.4942	0.699088	0.487179
			0.00041776	0.984802	0.910256															56.9325	0.75076	0.538462			0.0194242	0.927928	0.245283			0.0194242	0.927928	0.245283			60.5724	0.696049	0.487179
			0.000432186	0.984802	0.903846															57.1396	0.74772	0.538462			0.0199384	0.927928	0.238994			0.0199384	0.927928	0.238994			60.7058	0.693009	0.487179
			0.00043443	0.984802	0.897436															57.3449	0.744681	0.538462			0.0201358	0.921922	0.238994			0.0201358	0.921922	0.238994			60.9824	0.68997	0.487179
			0.000439542	0.984802	0.891026															57.4004	0.744681	0.532051			0.0202758	0.921922	0.232704			0.0202758	0.921922	0.232704			61.1946	0.68997	0.480769
			0.000459135	0.984802	0.884615															57.4865	0.744681	0.525641			0.0205914	0.921922	0.226415			0.0205914	0.921922	0.226415			61.3634	0.68693	0.480769
			0.000516154	0.984802	0.878205															57.6593	0.744681	0.519231			0.0209118	0.921922	0.220126			0.0209118	0.921922	0.220126			61.6549	0.683891	0.480769
			0.000574693	0.984802	0.871795															57.8707	0.741641	0.519231			0.0209336	0.921922	0.213836			0.0209336	0.921922	0.213836			61.8304	0.680851	0.480769
			0.000611491	0.984802	0.865385															58.0231	0.738602	0.519231			0.0209666	0.921922	0.207547			0.0209666	0.921922	0.207547			61.9194	0.680851	0.474359
			0.000646818	0.984802	0.858974															58.1309	0.738602	0.512821			0.0211519	0.918919	0.207547			0.0211519	0.918919	0.207547			61.9834	0.680851	0.467949
			0.000664481	0.984802	0.852564															58.2527	0.735562	0.512821			0.021322	0.915916	0.207547			0.021322	0.915916	0.207547			62.1585	0.677812	0.467949
			0.000673928	0.984802	0.846154															58.448	0.735562	0.50641			0.0214252	0.915916	0.201258			0.0214252	0.915916	0.201258			62.4682	0.674772	0.467949
			0.000720112	0.984802	0.839744															58.5904	0.735562	0.5			0.0218558	0.915916	0.194969			0.0218558	0.915916	0.194969			62.6917	0.671733	0.467949
			0.000774604	0.984802	0.833333															58.664	0.732523	0.5			0.0222248	0.912913	0.194969			0.0222248	0.912913	0.194969			62.7693	0.668693	0.467949
			0.000812705	0.984802	0.826923															58.7733	0.729483	0.5			0.022523	0.912913	0.188679			0.022523	0.912913	0.188679			62.833	0.668693	0.461538
			0.000850993	0.984802	0.820513															58.8388	0.726444	0.5			0.0229315	0.912913	0.18239			0.0229315	0.912913	0.18239			62.9238	0.668693	0.455128
			0.000878684	0.984802	0.814103															58.8588	0.723404	0.5			0.0231134	0.90991	0.18239			0.0231134	0.90991	0.18239			62.9849	0.665653	0.455128
			0.000894754	0.984802	0.807692															59.0214	0.723404	0.49359			0.0231831	0.90991	0.176101			0.0231831	0.90991	0.176101			63.0286	0.665653	0.448718
			0.000910735	0.984802	0.801282															59.2135	0.720365	0.49359			0.0232261	0.906907	0.176101			0.0232261	0.906907	0.176101			63.0874	0.662614	0.448718
			0.000988169	0.984802	0.794872															59.3243	0.720365	0.487179			0.023313	0.906907	0.169811			0.023313	0.906907	0.169811			63.1652	0.659574	0.448718
			0.00106943	0.984802	0.788462															59.5106	0.717325	0.487179			0.0237151	0.903904	0.169811			0.0237151	0.903904	0.169811			63.3287	0.659574	0.442308
			0.00113399	0.984802	0.782051															59.6995	0.714286	0.487179			0.0241258	0.900901	0.169811			0.0241258	0.900901	0.169811			63.4732	0.656535	0.442308
			0.00118495	0.984802	0.775641															59.927	0.711246	0.487179			0.0243584	0.900901	0.163522			0.0243584	0.900901	0.163522			63.5163	0.656535	0.435897
			0.00120886	0.984802	0.769231															60.1618	0.708207	0.487179			0.0245793	0.900901	0.157233			0.0245793	0.900901	0.157233			63.5826	0.653495	0.435897
			0.00126432	0.984802	0.762821															60.3092	0.705167	0.487179			0.0249473	0.900901	0.150943			0.0249473	0.900901	0.150943			63.6631	0.650456	0.435897
			0.00137227	0.984802	0.75641															60.4207	0.702128	0.487179			0.0254207	0.897898	0.150943			0.0254207	0.897898	0.150943			63.7218	0.647416	0.435897
			0.00149843	0.984802	0.75															60.4942	0.699088	0.487179			0.025771	0.897898	0.144654			0.025771	0.897898	0.144654			63.7776	0.644377	0.435897
			0.00158582	0.984802	0.74359															60.5724	0.696049	0.487179			0.0263284	0.897898	0.138365			0.0263284	0.897898	0.138365			64.0333	0.641337	0.435897
			0.00168595	0.984802	0.737179															60.7058	0.693009	0.487179			0.0268027	0.894895	0.138365			0.0268027	0.894895	0.138365			64.2666	0.638298	0.435897
			0.0017564	0.984802	0.730769															60.9824	0.68997	0.487179			0.0271094	0.894895	0.132075			0.0271094	0.894895	0.132075			64.3415	0.635258	0.435897
			0.00177573	0.984802	0.724359															61.1946	0.68997	0.480769			0.0275886	0.891892	0.132075			0.0275886	0.891892	0.132075			64.4405	0.635258	0.429487
			0.00189496	0.984802	0.717949															61.3634	0.68693	0.480769			0.0278668	0.888889	0.132075			0.0278668	0.888889	0.132075			64.5012	0.632219	0.429487
			0.00204616	0.984802	0.711538															61.6549	0.683891	0.480769			0.0278979	0.888889	0.125786			0.0278979	0.888889	0.125786			64.5498	0.629179	0.429487
			0.00213784	0.984802	0.705128															61.8304	0.680851	0.480769			0.0279525	0.888889	0.119497			0.0279525	0.888889	0.119497			64.7679	0.62614	0.429487
			0.00220929	0.984802	0.698718															61.9194	0.680851	0.474359			0.0280427	0.888889	0.113208			0.0280427	0.888889	0.113208			65.013	0.62614	0.423077
			0.00224632	0.981763	0.698718															61.9834	0.680851	0.467949			0.0289082	0.885886	0.113208			0.0289082	0.885886	0.113208			65.1161	0.6231	0.423077
			0.00239982	0.978723	0.698718															62.1585	0.677812	0.467949			0.0301351	0.885886	0.106918			0.0301351	0.885886	0.106918			65.1816	0.6231	0.416667
			0.00267719	0.978723	0.692308															62.4682	0.674772	0.467949			0.030567	0.885886	0.100629			0.030567	0.885886	0.100629			65.2153	0.620061	0.416667
			0.00281563	0.975684	0.692308															62.6917	0.671733	0.467949			0.0306751	0.885886	0.0943396			0.0306751	0.885886	0.0943396			65.3	0.617021	0.416667
			0.00298831	0.972644	0.692308															62.7693	0.668693	0.467949			0.0309175	0.885886	0.0880503			0.0309175	0.885886	0.0880503			65.4696	0.617021	0.410256
			0.00335728	0.972644	0.685897															62.833	0.668693	0.461538			0.0315838	0.882883	0.0880503			0.0315838	0.882883	0.0880503			65.6921	0.613982	0.410256
			0.00357111	0.972644	0.679487															62.9238	0.668693	0.455128			0.0325533	0.87988	0.0880503			0.0325533	0.87988	0.0880503			65.8195	0.610942	0.410256
			0.00359358	0.972644	0.673077															62.9849	0.665653	0.455128			0.0330908	0.87988	0.081761			0.0330908	0.87988	0.081761			65.853	0.607903	0.410256
			0.00361112	0.972644	0.666667															63.0286	0.665653	0.448718			0.0332671	0.87988	0.0754717			0.0332671	0.87988	0.0754717			66.0284	0.607903	0.403846
			0.00367211	0.972644	0.660256															63.0874	0.662614	0.448718			0.0335752	0.876877	0.0754717			0.0335752	0.876877	0.0754717			66.2983	0.604863	0.403846
			0.003835	0.972644	0.653846															63.1652	0.659574	0.448718			0.0339045	0.873874	0.0754717			0.0339045	0.873874	0.0754717			66.4256	0.601824	0.403846
			0.00394914	0.972644	0.647436															63.3287	0.659574	0.442308			0.034031	0.870871	0.0754717			0.034031	0.870871	0.0754717			66.4649	0.601824	0.397436
			0.00399873	0.972644	0.641026															63.4732	0.656535	0.442308			0.0340774	0.867868	0.0754717			0.0340774	0.867868	0.0754717			66.549	0.601824	0.391026
			0.00405426	0.972644	0.634615															63.5163	0.656535	0.435897			0.034153	0.864865	0.0754717			0.034153	0.864865	0.0754717			66.6553	0.598784	0.391026
			0.00410926	0.969605	0.634615															63.5826	0.653495	0.435897			0.0344612	0.861862	0.0754717			0.0344612	0.861862	0.0754717			66.7205	0.595745	0.391026
			0.00428583	0.969605	0.628205															63.6631	0.650456	0.435897			0.034911	0.858859	0.0754717			0.034911	0.858859	0.0754717			66.7838	0.595745	0.384615
			0.00445591	0.969605	0.621795															63.7218	0.647416	0.435897			0.0353185	0.855856	0.0754717			0.0353185	0.855856	0.0754717			66.8484	0.592705	0.384615
			0.00451958	0.969605	0.615385															63.7776	0.644377	0.435897			0.0356126	0.852853	0.0754717			0.0356126	0.852853	0.0754717			66.992	0.589666	0.384615
			0.00463882	0.969605	0.608974															64.0333	0.641337	0.435897			0.036053	0.84985	0.0754717			0.036053	0.84985	0.0754717			67.2384	0.586626	0.384615
			0.00474849	0.969605	0.602564															64.2666	0.638298	0.435897			0.0365703	0.846847	0.0754717			0.0365703	0.846847	0.0754717			67.3711	0.583587	0.384615
			0.00484328	0.969605	0.596154															64.3415	0.635258	0.435897			0.0377277	0.840841	0.0754717			0.0377277	0.840841	0.0754717			67.502	0.580547	0.384615
			0.00499718	0.969605	0.589744															64.4405	0.635258	0.429487			0.0391586	0.840841	0.0691824			0.0391586	0.840841	0.0691824			67.622	0.580547	0.378205
			0.00517338	0.969605	0.583333															64.5012	0.632219	0.429487			0.0398586	0.837838	0.0691824			0.0398586	0.837838	0.0691824			67.6565	0.577508	0.378205
			0.00531175	0.969605	0.576923															64.5498	0.629179	0.429487			0.040348	0.834835	0.0691824			0.040348	0.834835	0.0691824			67.7052	0.574468	0.378205
			0.0053506	0.969605	0.570513															64.7679	0.62614	0.429487			0.0408604	0.831832	0.0691824			0.0408604	0.831832	0.0691824			67.7419	0.574468	0.371795
			0.00540693	0.966565	0.570513															65.013	0.62614	0.423077			0.0416195	0.828829	0.0691824			0.0416195	0.828829	0.0691824			67.8016	0.571429	0.371795
			0.00562576	0.966565	0.564103															65.1161	0.6231	0.423077			0.0422303	0.825826	0.0691824			0.0422303	0.825826	0.0691824			67.8666	0.568389	0.371795
			0.00591571	0.966565	0.557692															65.1816	0.6231	0.416667			0.0424268	0.822823	0.0691824			0.0424268	0.822823	0.0691824			67.8903	0.56535	0.371795
			0.00617169	0.966565	0.551282															65.2153	0.620061	0.416667			0.0428484	0.81982	0.0691824			0.0428484	0.81982	0.0691824			67.959	0.56535	0.365385
			0.00630557	0.966565	0.544872															65.3	0.617021	0.416667			0.0435757	0.816817	0.0691824			0.0435757	0.816817	0.0691824			68.1188	0.56535	0.358974
			0.00637006	0.966565	0.538462															65.4696	0.617021	0.410256			0.0445627	0.813814	0.0691824			0.0445627	0.813814	0.0691824			68.2524	0.56535	0.352564
			0.00655602	0.966565	0.532051															65.6921	0.613982	0.410256			0.0452694	0.810811	0.0691824			0.0452694	0.810811	0.0691824			68.299	0.56231	0.352564
			0.00679453	0.966565	0.525641															65.8195	0.610942	0.410256			0.0455278	0.807808	0.0691824			0.0455278	0.807808	0.0691824			68.3302	0.559271	0.352564
			0.00701315	0.966565	0.519231															65.853	0.607903	0.410256			0.0459464	0.804805	0.0691824			0.0459464	0.804805	0.0691824			68.3908	0.556231	0.352564
			0.00714425	0.966565	0.512821															66.0284	0.607903	0.403846			0.0462322	0.804805	0.0628931			0.0462322	0.804805	0.0628931			68.5134	0.556231	0.346154
			0.00720135	0.966565	0.50641															66.2983	0.604863	0.403846			0.046307	0.801802	0.0628931			0.046307	0.801802	0.0628931			68.6136	0.556231	0.339744
			0.00730947	0.966565	0.5															66.4256	0.601824	0.403846			0.0464906	0.798799	0.0628931			0.0464906	0.798799	0.0628931			68.7168	0.553191	0.339744
			0.00749755	0.966565	0.49359															66.4649	0.601824	0.397436			0.0468834	0.795796	0.0628931			0.0468834	0.795796	0.0628931			68.8108	0.550152	0.339744
			0.00766953	0.963526	0.49359															66.549	0.601824	0.391026			0.0471254	0.795796	0.0566038			0.0471254	0.795796	0.0566038			68.8207	0.547112	0.339744
			0.00774385	0.963526	0.487179															66.6553	0.598784	0.391026			0.0471587	0.792793	0.0566038			0.0471587	0.792793	0.0566038			68.8859	0.547112	0.333333
			0.00786949	0.963526	0.480769															66.7205	0.595745	0.391026			0.0474741	0.78979	0.0566038			0.0474741	0.78979	0.0566038			68.9668	0.547112	0.326923
			0.0080055	0.960486	0.480769															66.7838	0.595745	0.384615			0.0478585	0.786787	0.0566038			0.0478585	0.786787	0.0566038			69.0076	0.544073	0.326923
			0.00817772	0.957447	0.480769															66.8484	0.592705	0.384615			0.0479616	0.783784	0.0566038			0.0479616	0.783784	0.0566038			69.0345	0.541033	0.326923
			0.00836133	0.957447	0.474359															66.992	0.589666	0.384615			0.0479962	0.780781	0.0566038			0.0479962	0.780781	0.0566038			69.0518	0.537994	0.326923
			0.00842614	0.957447	0.467949															67.2384	0.586626	0.384615			0.0482875	0.777778	0.0566038			0.0482875	0.777778	0.0566038			69.1225	0.534954	0.326923
			0.00847894	0.957447	0.461538															67.3711	0.583587	0.384615			0.0485909	0.774775	0.0566038			0.0485909	0.774775	0.0566038			69.2153	0.534954	0.320513
			0.00850884	0.957447	0.455128															67.502	0.580547	0.384615			0.0486856	0.771772	0.0566038			0.0486856	0.771772	0.0566038			69.2822	0.531915	0.320513
			0.00861359	0.957447	0.448718															67.622	0.580547	0.378205			0.0493036	0.768769	0.0566038			0.0493036	0.768769	0.0566038			69.3369	0.531915	0.314103
			0.00895277	0.957447	0.442308															67.6565	0.577508	0.378205			0.0501015	0.765766	0.0566038			0.0501015	0.765766	0.0566038			69.3836	0.528875	0.314103
			0.00936094	0.957447	0.435897															67.7052	0.574468	0.378205			0.0504288	0.765766	0.0503145			0.0504288	0.765766	0.0503145			69.4249	0.525836	0.314103
			0.00967103	0.957447	0.429487															67.7419	0.574468	0.371795			0.0507758	0.762763	0.0503145			0.0507758	0.762763	0.0503145			69.5751	0.522796	0.314103
			0.00984454	0.957447	0.423077															67.8016	0.571429	0.371795			0.0514434	0.75976	0.0503145			0.0514434	0.75976	0.0503145			69.7369	0.522796	0.307692
			0.00989172	0.957447	0.416667															67.8666	0.568389	0.371795			0.0522498	0.756757	0.0503145			0.0522498	0.756757	0.0503145			69.7852	0.522796	0.301282
			0.0099554	0.957447	0.410256															67.8903	0.56535	0.371795			0.0527149	0.753754	0.0503145			0.0527149	0.753754	0.0503145			69.8449	0.522796	0.294872
			0.0100413	0.93617	0.410256															67.959	0.56535	0.365385			0.0529386	0.750751	0.0503145			0.0529386	0.750751	0.0503145			69.9431	0.519757	0.294872
			0.0101949	0.93617	0.403846															68.1188	0.56535	0.358974			0.0532913	0.747748	0.0503145			0.0532913	0.747748	0.0503145			70.0542	0.516717	0.294872
			0.0105012	0.93617	0.397436															68.2524	0.56535	0.352564			0.0535333	0.744745	0.0503145			0.0535333	0.744745	0.0503145			70.1701	0.513678	0.294872
			0.0108829	0.93617	0.391026															68.299	0.56231	0.352564			0.0536193	0.741742	0.0503145			0.0536193	0.741742	0.0503145			70.2362	0.510638	0.294872
			0.0113573	0.93617	0.384615															68.3302	0.559271	0.352564			0.0536769	0.738739	0.0503145			0.0536769	0.738739	0.0503145			70.26	0.507599	0.294872
			0.0117681	0.933131	0.384615															68.3908	0.556231	0.352564			0.0537346	0.735736	0.0503145			0.0537346	0.735736	0.0503145			70.3222	0.504559	0.294872
			0.0119563	0.933131	0.378205															68.5134	0.556231	0.346154			0.053865	0.732733	0.0503145			0.053865	0.732733	0.0503145			70.3706	0.50152	0.294872
			0.0122207	0.933131	0.371795															68.6136	0.556231	0.339744			0.054261	0.72973	0.0503145			0.054261	0.72973	0.0503145			70.4315	0.49848	0.294872
			0.0127022	0.930091	0.371795															68.7168	0.553191	0.339744			0.0549326	0.726727	0.0503145			0.0549326	0.726727	0.0503145			70.4934	0.49848	0.288462
			0.0130466	0.927052	0.371795															68.8108	0.550152	0.339744			0.055808	0.723724	0.0503145			0.055808	0.723724	0.0503145			70.5132	0.49848	0.282051
			0.0132268	0.927052	0.365385															68.8207	0.547112	0.339744			0.0564818	0.720721	0.0503145			0.0564818	0.720721	0.0503145			70.5303	0.49848	0.275641
			0.0135045	0.927052	0.358974															68.8859	0.547112	0.333333			0.0567055	0.717718	0.0503145			0.0567055	0.717718	0.0503145			70.535	0.49848	0.269231
			0.0136978	0.927052	0.352564															68.9668	0.547112	0.326923			0.0570466	0.714715	0.0503145			0.0570466	0.714715	0.0503145			70.5579	0.495441	0.269231
			0.0147269	0.927052	0.346154															69.0076	0.544073	0.326923			0.0575381	0.708709	0.0503145			0.0575381	0.708709	0.0503145			70.585	0.492401	0.269231
			0.0157543	0.927052	0.339744															69.0345	0.541033	0.326923			0.057955	0.705706	0.0503145			0.057955	0.705706	0.0503145			70.7323	0.489362	0.269231
			0.0159533	0.927052	0.333333															69.0518	0.537994	0.326923			0.0582923	0.702703	0.0503145			0.0582923	0.702703	0.0503145			70.9374	0.486322	0.269231
			0.0162829	0.927052	0.326923															69.1225	0.534954	0.326923			0.0584625	0.6997	0.0503145			0.0584625	0.6997	0.0503145			71.0135	0.483283	0.269231
			0.0165321	0.927052	0.320513															69.2153	0.534954	0.320513			0.0592149	0.696697	0.0503145			0.0592149	0.696697	0.0503145			71.2143	0.480243	0.269231
			0.0168583	0.927052	0.314103															69.2822	0.531915	0.320513			0.0600061	0.693694	0.0503145			0.0600061	0.693694	0.0503145			71.4652	0.477204	0.269231
			0.0171175	0.927052	0.307692															69.3369	0.531915	0.314103			0.0601867	0.690691	0.0503145			0.0601867	0.690691	0.0503145			71.529	0.477204	0.262821
			0.0172813	0.927052	0.301282															69.3836	0.528875	0.314103			0.0604417	0.687688	0.0503145			0.0604417	0.687688	0.0503145			71.5945	0.474164	0.262821
			0.0174353	0.927052	0.294872															69.4249	0.525836	0.314103			0.0607908	0.684685	0.0503145			0.0607908	0.684685	0.0503145			71.6702	0.471125	0.262821
			0.0175335	0.927052	0.288462															69.5751	0.522796	0.314103			0.0610315	0.681682	0.0503145			0.0610315	0.681682	0.0503145			71.6948	0.468085	0.262821
			0.0176336	0.927052	0.282051															69.7369	0.522796	0.307692			0.061561	0.678679	0.0503145			0.061561	0.678679	0.0503145			71.9029	0.465046	0.262821
			0.0176679	0.927052	0.275641															69.7852	0.522796	0.301282			0.0624441	0.675676	0.0503145			0.0624441	0.675676	0.0503145			72.0975	0.462006	0.262821
			0.0181024	0.927052	0.269231															69.8449	0.522796	0.294872			0.0631325	0.672673	0.0503145			0.0631325	0.672673	0.0503145			72.1429	0.458967	0.262821
			0.0185929	0.927052	0.262821															69.9431	0.519757	0.294872			0.0635529	0.66967	0.0503145			0.0635529	0.66967	0.0503145			72.1995	0.455927	0.262821
			0.0188212	0.927052	0.25641															70.0542	0.516717	0.294872			0.0645696	0.663664	0.0503145			0.0645696	0.663664	0.0503145			72.2268	0.452888	0.262821
			0.0194242	0.927052	0.25															70.1701	0.513678	0.294872			0.0657913	0.660661	0.0503145			0.0657913	0.660661	0.0503145			72.2703	0.449848	0.262821
			0.0199384	0.927052	0.24359															70.2362	0.510638	0.294872			0.0665136	0.657658	0.0503145			0.0665136	0.657658	0.0503145			72.3321	0.446809	0.262821
			0.0201358	0.920973	0.24359															70.26	0.507599	0.294872			0.066912	0.654655	0.0503145			0.066912	0.654655	0.0503145			72.3846	0.443769	0.262821
			0.0202758	0.920973	0.237179															70.3222	0.504559	0.294872			0.0673885	0.651652	0.0503145			0.0673885	0.651652	0.0503145			72.432	0.440729	0.262821
			0.0205914	0.920973	0.230769															70.3706	0.50152	0.294872			0.0682149	0.648649	0.0503145			0.0682149	0.648649	0.0503145			72.5646	0.43769	0.262821
			0.0209118	0.920973	0.224359															70.4315	0.49848	0.294872			0.0689917	0.645646	0.0503145			0.0689917	0.645646	0.0503145			72.6779	0.43465	0.262821
			0.0209336	0.920973	0.217949															70.4934	0.49848	0.288462			0.07026	0.642643	0.0503145			0.07026	0.642643	0.0503145			72.7056	0.431611	0.262821
			0.0209666	0.920973	0.211538															70.5132	0.49848	0.282051			0.0711491	0.63964	0.0503145			0.0711491	0.63964	0.0503145			72.7307	0.431611	0.25641
			0.0211519	0.917933	0.211538															70.5303	0.49848	0.275641			0.0711997	0.636637	0.0503145			0.0711997	0.636637	0.0503145			72.742	0.428571	0.25641
			0.021322	0.914894	0.211538															70.535	0.49848	0.269231			0.0715838	0.633634	0.0503145			0.0715838	0.633634	0.0503145			72.7736	0.428571	0.25
			0.0214252	0.914894	0.205128															70.5579	0.495441	0.269231			0.0723613	0.630631	0.0503145			0.0723613	0.630631	0.0503145			72.9371	0.428571	0.24359
			0.0218558	0.914894	0.198718															70.585	0.492401	0.269231			0.0728598	0.627628	0.0503145			0.0728598	0.627628	0.0503145			73.0984	0.425532	0.24359
			0.0222248	0.911854	0.198718															70.7323	0.489362	0.269231			0.0729927	0.624625	0.0503145			0.0729927	0.624625	0.0503145			73.1369	0.422492	0.24359
			0.022523	0.911854	0.192308															70.9374	0.486322	0.269231			0.0730995	0.621622	0.0503145			0.0730995	0.621622	0.0503145			73.1837	0.422492	0.237179
			0.0229315	0.911854	0.185897															71.0135	0.483283	0.269231			0.0748906	0.618619	0.0503145			0.0748906	0.618619	0.0503145			73.2308	0.419453	0.237179
			0.0231134	0.908815	0.185897															71.2143	0.480243	0.269231			0.076835	0.615616	0.0503145			0.076835	0.615616	0.0503145			73.2868	0.416413	0.237179
			0.0231831	0.908815	0.179487															71.4652	0.477204	0.269231			0.077829	0.612613	0.0503145			0.077829	0.612613	0.0503145			73.3724	0.413374	0.237179
			0.0232261	0.905775	0.179487															71.529	0.477204	0.262821			0.0789278	0.60961	0.0503145			0.0789278	0.60961	0.0503145			73.4442	0.413374	0.230769
			0.023313	0.905775	0.173077															71.5945	0.474164	0.262821			0.0794603	0.606607	0.0503145			0.0794603	0.606607	0.0503145			73.4992	0.410334	0.230769
			0.0237151	0.902736	0.173077															71.6702	0.471125	0.262821			0.080261	0.603604	0.0503145			0.080261	0.603604	0.0503145			73.5439	0.407295	0.230769
			0.0241258	0.899696	0.173077															71.6948	0.468085	0.262821			0.0814713	0.600601	0.0503145			0.0814713	0.600601	0.0503145			73.6991	0.404255	0.230769
			0.0243584	0.899696	0.166667															71.9029	0.465046	0.262821			0.0824074	0.597598	0.0503145			0.0824074	0.597598	0.0503145			73.9428	0.401216	0.230769
			0.0245793	0.899696	0.160256															72.0975	0.462006	0.262821			0.0829538	0.594595	0.0503145			0.0829538	0.594595	0.0503145			74.08	0.401216	0.224359
			0.0249473	0.899696	0.153846															72.1429	0.458967	0.262821			0.0834734	0.591592	0.0503145			0.0834734	0.591592	0.0503145			74.1243	0.398176	0.224359
			0.0254207	0.896657	0.153846															72.1995	0.455927	0.262821			0.0845382	0.588589	0.0503145			0.0845382	0.588589	0.0503145			74.1393	0.395137	0.224359
			0.025771	0.896657	0.147436															72.2268	0.452888	0.262821			0.0854703	0.585586	0.0503145			0.0854703	0.585586	0.0503145			74.1751	0.392097	0.224359
			0.0263284	0.896657	0.141026															72.2703	0.449848	0.262821			0.0859861	0.582583	0.0503145			0.0859861	0.582583	0.0503145			74.2221	0.389058	0.224359
			0.0268027	0.893617	0.141026															72.3321	0.446809	0.262821			0.0866562	0.57958	0.0503145			0.0866562	0.57958	0.0503145			74.2848	0.386018	0.224359
			0.0271094	0.893617	0.134615															72.3846	0.443769	0.262821			0.087726	0.576577	0.0503145			0.087726	0.576577	0.0503145			74.3637	0.386018	0.217949
			0.0275886	0.890578	0.134615															72.432	0.440729	0.262821			0.0890507	0.573574	0.0503145			0.0890507	0.573574	0.0503145			74.3935	0.386018	0.211538
			0.0278668	0.887538	0.134615															72.5646	0.43769	0.262821			0.0898074	0.570571	0.0503145			0.0898074	0.570571	0.0503145			74.4048	0.382979	0.211538
			0.0278979	0.887538	0.128205															72.6779	0.43465	0.262821			0.0907083	0.567568	0.0503145			0.0907083	0.567568	0.0503145			74.4504	0.379939	0.211538
			0.0279525	0.887538	0.121795															72.7056	0.431611	0.262821			0.0919146	0.564565	0.0503145			0.0919146	0.564565	0.0503145			74.6123	0.3769	0.211538
			0.0280427	0.887538	0.115385															72.7307	0.431611	0.25641			0.0937845	0.561562	0.0503145			0.0937845	0.561562	0.0503145			74.775	0.3769	0.205128
			0.0289082	0.884498	0.115385															72.742	0.428571	0.25641			0.0963067	0.558559	0.0503145			0.0963067	0.558559	0.0503145			74.8377	0.37386	0.205128
			0.0301351	0.884498	0.108974															72.7736	0.428571	0.25			0.0977526	0.558559	0.0440252			0.0977526	0.558559	0.0440252			74.9477	0.370821	0.205128
			0.030567	0.884498	0.102564															72.9371	0.428571	0.24359			0.098672	0.555556	0.0440252			0.098672	0.555556	0.0440252			75.0353	0.367781	0.205128
			0.0306751	0.884498	0.0961538															73.0984	0.425532	0.24359			0.0995526	0.552553	0.0440252			0.0995526	0.552553	0.0440252			75.0427	0.364742	0.205128
			0.0309175	0.884498	0.0897436															73.1369	0.422492	0.24359			0.0999502	0.54955	0.0440252			0.0999502	0.54955	0.0440252			75.1787	0.364742	0.198718
			0.0315838	0.881459	0.0897436															73.1837	0.422492	0.237179			0.100352	0.546547	0.0440252			0.100352	0.546547	0.0440252			75.3286	0.361702	0.198718
			0.0325533	0.878419	0.0897436															73.2308	0.419453	0.237179			0.100705	0.543544	0.0440252			0.100705	0.543544	0.0440252			75.3728	0.358663	0.198718
			0.0330908	0.878419	0.0833333															73.2868	0.416413	0.237179			0.101062	0.540541	0.0440252			0.101062	0.540541	0.0440252			75.4211	0.355623	0.198718
			0.0332671	0.878419	0.0769231															73.3724	0.413374	0.237179			0.101627	0.537538	0.0440252			0.101627	0.537538	0.0440252			75.4556	0.355623	0.192308
			0.0335752	0.87538	0.0769231															73.4442	0.413374	0.230769			0.102198	0.534535	0.0440252			0.102198	0.534535	0.0440252			75.5173	0.352584	0.192308
			0.0339045	0.87234	0.0769231															73.4992	0.410334	0.230769			0.102936	0.531532	0.0440252			0.102936	0.531532	0.0440252			75.7427	0.349544	0.192308
			0.034031	0.869301	0.0769231															73.5439	0.407295	0.230769			0.103735	0.528529	0.0440252			0.103735	0.528529	0.0440252			75.979	0.346505	0.192308
			0.0340774	0.866261	0.0769231															73.6991	0.404255	0.230769			0.104221	0.525526	0.0440252			0.104221	0.525526	0.0440252			76.0625	0.346505	0.185897
			0.034153	0.863222	0.0769231															73.9428	0.401216	0.230769			0.104713	0.522523	0.0440252			0.104713	0.522523	0.0440252			76.0894	0.343465	0.185897
			0.0344612	0.860182	0.0769231															74.08	0.401216	0.224359			0.105208	0.51952	0.0440252			0.105208	0.51952	0.0440252			76.1076	0.340426	0.185897
			0.034911	0.857143	0.0769231															74.1243	0.398176	0.224359			0.105541	0.516517	0.0440252			0.105541	0.516517	0.0440252			76.1994	0.337386	0.185897
			0.0353185	0.854103	0.0769231															74.1393	0.395137	0.224359			0.106159	0.513514	0.0440252			0.106159	0.513514	0.0440252			76.3208	0.337386	0.179487
			0.0356126	0.851064	0.0769231															74.1751	0.392097	0.224359			0.107535	0.510511	0.0440252			0.107535	0.510511	0.0440252			76.3928	0.334347	0.179487
			0.036053	0.848024	0.0769231															74.2221	0.389058	0.224359			0.108756	0.507508	0.0440252			0.108756	0.507508	0.0440252			76.5425	0.331307	0.179487
			0.0365703	0.844985	0.0769231															74.2848	0.386018	0.224359			0.109592	0.504505	0.0440252			0.109592	0.504505	0.0440252			76.7326	0.328267	0.179487
			0.0377277	0.838906	0.0769231															74.3637	0.386018	0.217949			0.110254	0.501502	0.0440252			0.110254	0.501502	0.0440252			76.8595	0.325228	0.179487
			0.0391586	0.838906	0.0705128															74.3935	0.386018	0.211538			0.110497	0.498498	0.0440252			0.110497	0.498498	0.0440252			77.0867	0.322188	0.179487
			0.0398586	0.835866	0.0705128															74.4048	0.382979	0.211538			0.110865	0.495495	0.0440252			0.110865	0.495495	0.0440252			77.2589	0.319149	0.179487
			0.040348	0.832827	0.0705128															74.4504	0.379939	0.211538			0.113159	0.492492	0.0440252			0.113159	0.492492	0.0440252			77.3216	0.319149	0.173077
			0.0408604	0.829787	0.0705128															74.6123	0.3769	0.211538			0.11534	0.489489	0.0440252			0.11534	0.489489	0.0440252			77.4235	0.316109	0.173077
			0.0416195	0.826748	0.0705128															74.775	0.3769	0.205128			0.115607	0.486486	0.0440252			0.115607	0.486486	0.0440252			77.4677	0.31307	0.173077
			0.0422303	0.823708	0.0705128															74.8377	0.37386	0.205128			0.116282	0.483483	0.0440252			0.116282	0.483483	0.0440252			77.5199	0.31003	0.173077
			0.0424268	0.820669	0.0705128															74.9477	0.370821	0.205128			0.117028	0.48048	0.0440252			0.117028	0.48048	0.0440252			77.5766	0.306991	0.173077
			0.0428484	0.817629	0.0705128															75.0353	0.367781	0.205128			0.117999	0.477477	0.0440252			0.117999	0.477477	0.0440252			77.6452	0.303951	0.173077
			0.0435757	0.81459	0.0705128															75.0427	0.364742	0.205128			0.118835	0.474474	0.0440252			0.118835	0.474474	0.0440252			77.7631	0.300912	0.173077
			0.0445627	0.81155	0.0705128															75.1787	0.364742	0.198718			0.118977	0.471471	0.0440252			0.118977	0.471471	0.0440252			77.819	0.297872	0.173077
			0.0452694	0.808511	0.0705128															75.3286	0.361702	0.198718			0.119119	0.468468	0.0440252			0.119119	0.468468	0.0440252			77.8532	0.297872	0.166667
			0.0455278	0.805471	0.0705128															75.3728	0.358663	0.198718			0.119547	0.465465	0.0440252			0.119547	0.465465	0.0440252			77.8913	0.294833	0.166667
			0.0459464	0.802432	0.0705128															75.4211	0.355623	0.198718			0.120339	0.462462	0.0440252			0.120339	0.462462	0.0440252			77.899	0.291793	0.166667
			0.0462322	0.802432	0.0641026															75.4556	0.355623	0.192308			0.122115	0.459459	0.0440252			0.122115	0.459459	0.0440252			77.9226	0.291793	0.160256
			0.046307	0.799392	0.0641026															75.5173	0.352584	0.192308			0.123917	0.456456	0.0440252			0.123917	0.456456	0.0440252			77.963	0.291793	0.153846
			0.0464906	0.796353	0.0641026															75.7427	0.349544	0.192308			0.125003	0.453453	0.0440252			0.125003	0.453453	0.0440252			78.0765	0.291793	0.147436
			0.0468834	0.793313	0.0641026															75.979	0.346505	0.192308			0.125866	0.447447	0.0440252			0.125866	0.447447	0.0440252			78.2782	0.291793	0.141026
			0.0471254	0.793313	0.0576923															76.0625	0.346505	0.185897			0.126746	0.444444	0.0440252			0.126746	0.444444	0.0440252			78.5855	0.288754	0.141026
			0.0471587	0.790274	0.0576923															76.0894	0.343465	0.185897			0.127962	0.438438	0.0440252			0.127962	0.438438	0.0440252			78.7917	0.285714	0.141026
			0.0474741	0.787234	0.0576923															76.1076	0.340426	0.185897			0.128617	0.435435	0.0440252			0.128617	0.435435	0.0440252			78.8349	0.282675	0.141026
			0.0478585	0.784195	0.0576923															76.1994	0.337386	0.185897			0.12937	0.432432	0.0440252			0.12937	0.432432	0.0440252			78.8792	0.282675	0.134615
			0.0479616	0.781155	0.0576923															76.3208	0.337386	0.179487			0.130379	0.429429	0.0440252			0.130379	0.429429	0.0440252			78.9697	0.279635	0.134615
			0.0479962	0.778116	0.0576923															76.3928	0.334347	0.179487			0.13089	0.426426	0.0440252			0.13089	0.426426	0.0440252			79.0611	0.276596	0.134615
			0.0482875	0.775076	0.0576923															76.5425	0.331307	0.179487			0.131148	0.42042	0.0440252			0.131148	0.42042	0.0440252			79.0809	0.273556	0.134615
			0.0485909	0.772036	0.0576923															76.7326	0.328267	0.179487			0.131493	0.417417	0.0440252			0.131493	0.417417	0.0440252			79.0946	0.270517	0.134615
			0.0486856	0.768997	0.0576923															76.8595	0.325228	0.179487			0.133353	0.414414	0.0440252			0.133353	0.414414	0.0440252			79.1478	0.270517	0.128205
			0.0493036	0.765957	0.0576923															77.0867	0.322188	0.179487			0.136728	0.408408	0.0440252			0.136728	0.408408	0.0440252			79.2226	0.267477	0.128205
			0.0501015	0.762918	0.0576923															77.2589	0.319149	0.179487			0.1386	0.405405	0.0440252			0.1386	0.405405	0.0440252			79.2736	0.264438	0.128205
			0.0504288	0.762918	0.0512821															77.3216	0.319149	0.173077			0.139278	0.402402	0.0440252			0.139278	0.402402	0.0440252			79.3091	0.261398	0.128205
			0.0507758	0.759878	0.0512821															77.4235	0.316109	0.173077			0.140353	0.399399	0.0440252			0.140353	0.399399	0.0440252			79.3242	0.258359	0.128205
			0.0514434	0.756839	0.0512821															77.4677	0.31307	0.173077			0.141044	0.396396	0.0440252			0.141044	0.396396	0.0440252			79.332	0.255319	0.128205
			0.0522498	0.753799	0.0512821															77.5199	0.31003	0.173077			0.141443	0.393393	0.0440252			0.141443	0.393393	0.0440252			79.3381	0.25228	0.128205
			0.0527149	0.75076	0.0512821															77.5766	0.306991	0.173077			0.141744	0.39039	0.0440252			0.141744	0.39039	0.0440252			79.3515	0.24924	0.128205
			0.0529386	0.74772	0.0512821															77.6452	0.303951	0.173077			0.142147	0.387387	0.0440252			0.142147	0.387387	0.0440252			79.3754	0.246201	0.128205
			0.0532913	0.744681	0.0512821															77.7631	0.300912	0.173077			0.142756	0.384384	0.0440252			0.142756	0.384384	0.0440252			79.4068	0.246201	0.121795
			0.0535333	0.741641	0.0512821															77.819	0.297872	0.173077			0.143164	0.381381	0.0440252			0.143164	0.381381	0.0440252			79.4334	0.243161	0.121795
			0.0536193	0.738602	0.0512821															77.8532	0.297872	0.166667			0.143679	0.378378	0.0440252			0.143679	0.378378	0.0440252			79.4948	0.240122	0.121795
			0.0536769	0.735562	0.0512821															77.8913	0.294833	0.166667			0.14451	0.375375	0.0440252			0.14451	0.375375	0.0440252			79.5516	0.237082	0.121795
			0.0537346	0.732523	0.0512821															77.899	0.291793	0.166667			0.145033	0.372372	0.0440252			0.145033	0.372372	0.0440252			79.624	0.234043	0.121795
			0.053865	0.729483	0.0512821															77.9226	0.291793	0.160256			0.145349	0.369369	0.0440252			0.145349	0.369369	0.0440252			79.6978	0.231003	0.121795
			0.054261	0.726444	0.0512821															77.963	0.291793	0.153846			0.14588	0.366366	0.0440252			0.14588	0.366366	0.0440252			79.7662	0.227964	0.121795
			0.0549326	0.723404	0.0512821															78.0765	0.291793	0.147436			0.146413	0.36036	0.0440252			0.146413	0.36036	0.0440252			79.8765	0.224924	0.121795
			0.055808	0.720365	0.0512821															78.2782	0.291793	0.141026			0.147829	0.357357	0.0440252			0.147829	0.357357	0.0440252			79.9634	0.221884	0.121795
			0.0564818	0.717325	0.0512821															78.5855	0.288754	0.141026			0.149817	0.354354	0.0440252			0.149817	0.354354	0.0440252			80.0263	0.218845	0.121795
			0.0567055	0.714286	0.0512821															78.7917	0.285714	0.141026			0.15083	0.351351	0.0440252			0.15083	0.351351	0.0440252			80.1182	0.215805	0.121795
			0.0570466	0.711246	0.0512821															78.8349	0.282675	0.141026			0.151632	0.348348	0.0440252			0.151632	0.348348	0.0440252			80.2003	0.212766	0.121795
			0.0575381	0.705167	0.0512821															78.8792	0.282675	0.134615			0.152323	0.345345	0.0440252			0.152323	0.345345	0.0440252			80.2859	0.209726	0.121795
			0.057955	0.702128	0.0512821															78.9697	0.279635	0.134615			0.152907	0.342342	0.0440252			0.152907	0.342342	0.0440252			80.3764	0.206687	0.121795
			0.0582923	0.699088	0.0512821															79.0611	0.276596	0.134615			0.154812	0.339339	0.0440252			0.154812	0.339339	0.0440252			80.4065	0.203647	0.121795
			0.0584625	0.696049	0.0512821															79.0809	0.273556	0.134615			0.156618	0.336336	0.0440252			0.156618	0.336336	0.0440252			80.4576	0.200608	0.121795
			0.0592149	0.693009	0.0512821															79.0946	0.270517	0.134615			0.157233	0.333333	0.0440252			0.157233	0.333333	0.0440252			80.5124	0.197568	0.121795
			0.0600061	0.68997	0.0512821															79.1478	0.270517	0.128205			0.158231	0.33033	0.0440252			0.158231	0.33033	0.0440252			80.5252	0.194529	0.121795
			0.0601867	0.68693	0.0512821															79.2226	0.267477	0.128205			0.159236	0.327327	0.0440252			0.159236	0.327327	0.0440252			80.5691	0.191489	0.121795
			0.0604417	0.683891	0.0512821															79.2736	0.264438	0.128205			0.16052	0.321321	0.0440252			0.16052	0.321321	0.0440252			80.6453	0.18845	0.121795
			0.0607908	0.680851	0.0512821															79.3091	0.261398	0.128205			0.161813	0.318318	0.0440252			0.161813	0.318318	0.0440252			80.6831	0.18845	0.115385
			0.0610315	0.677812	0.0512821															79.3242	0.258359	0.128205			0.163274	0.315315	0.0440252			0.163274	0.315315	0.0440252			80.6998	0.18845	0.108974
			0.061561	0.674772	0.0512821															79.332	0.255319	0.128205			0.164609	0.312312	0.0440252			0.164609	0.312312	0.0440252			80.7133	0.18541	0.108974
			0.0624441	0.671733	0.0512821															79.3381	0.25228	0.128205			0.164881	0.309309	0.0440252			0.164881	0.309309	0.0440252			80.7198	0.182371	0.108974
			0.0631325	0.668693	0.0512821															79.3515	0.24924	0.128205			0.165153	0.306306	0.0440252			0.165153	0.306306	0.0440252			80.7501	0.179331	0.108974
			0.0635529	0.665653	0.0512821															79.3754	0.246201	0.128205			0.165426	0.303303	0.0440252			0.165426	0.303303	0.0440252			80.7771	0.176292	0.108974
			0.0645696	0.659574	0.0512821															79.4068	0.246201	0.121795			0.166393	0.3003	0.0440252			0.166393	0.3003	0.0440252			80.8048	0.173252	0.108974
			0.0657913	0.656535	0.0512821															79.4334	0.243161	0.121795			0.167364	0.297297	0.0440252			0.167364	0.297297	0.0440252			80.8998	0.170213	0.108974
			0.0665136	0.653495	0.0512821															79.4948	0.240122	0.121795			0.167645	0.294294	0.0440252			0.167645	0.294294	0.0440252			81.0465	0.167173	0.108974
			0.066912	0.650456	0.0512821															79.5516	0.237082	0.121795			0.167926	0.291291	0.0440252			0.167926	0.291291	0.0440252			81.1548	0.164134	0.108974
			0.0673885	0.647416	0.0512821															79.624	0.234043	0.121795			0.168636	0.285285	0.0440252			0.168636	0.285285	0.0440252			81.198	0.164134	0.102564
			0.0682149	0.644377	0.0512821															79.6978	0.231003	0.121795			0.170958	0.282282	0.0440252			0.170958	0.282282	0.0440252			81.2619	0.161094	0.102564
			0.0689917	0.641337	0.0512821															79.7662	0.227964	0.121795			0.173161	0.279279	0.0440252			0.173161	0.279279	0.0440252			81.3605	0.161094	0.0961538
			0.07026	0.638298	0.0512821															79.8765	0.224924	0.121795			0.173914	0.276276	0.0440252			0.173914	0.276276	0.0440252			81.443	0.161094	0.0897436
			0.0711491	0.635258	0.0512821															79.9634	0.221884	0.121795			0.174827	0.273273	0.0440252			0.174827	0.273273	0.0440252			81.519	0.161094	0.0833333
			0.0711997	0.632219	0.0512821															80.0263	0.218845	0.121795			0.176372	0.27027	0.0440252			0.176372	0.27027	0.0440252			81.6294	0.161094	0.0769231
			0.0715838	0.629179	0.0512821															80.1182	0.215805	0.121795			0.17762	0.264264	0.0440252			0.17762	0.264264	0.0440252			81.706	0.158055	0.0769231
			0.0723613	0.62614	0.0512821															80.2003	0.212766	0.121795			0.178254	0.261261	0.0440252			0.178254	0.261261	0.0440252			81.7266	0.155015	0.0769231
			0.0728598	0.6231	0.0512821															80.2859	0.209726	0.121795			0.179052	0.258258	0.0440252			0.179052	0.258258	0.0440252			81.7433	0.151976	0.0769231
			0.0729927	0.620061	0.0512821															80.3764	0.206687	0.121795			0.180183	0.255255	0.0440252			0.180183	0.255255	0.0440252			81.8352	0.148936	0.0769231
			0.0730995	0.617021	0.0512821															80.4065	0.203647	0.121795			0.181325	0.252252	0.0440252			0.181325	0.252252	0.0440252			81.9622	0.145897	0.0769231
			0.0748906	0.613982	0.0512821															80.4576	0.200608	0.121795			0.184019	0.249249	0.0440252			0.184019	0.249249	0.0440252			82.0042	0.145897	0.0705128
			0.076835	0.610942	0.0512821															80.5124	0.197568	0.121795			0.186918	0.246246	0.0440252			0.186918	0.246246	0.0440252			82.126	0.142857	0.0705128
			0.077829	0.607903	0.0512821															80.5252	0.194529	0.121795			0.188148	0.243243	0.0440252			0.188148	0.243243	0.0440252			82.3733	0.139818	0.0705128
			0.0789278	0.604863	0.0512821															80.5691	0.191489	0.121795			0.189216	0.24024	0.0440252			0.189216	0.24024	0.0440252			82.5184	0.136778	0.0705128
			0.0794603	0.601824	0.0512821															80.6453	0.18845	0.121795			0.190297	0.237237	0.0440252			0.190297	0.237237	0.0440252			82.5935	0.133739	0.0705128
			0.080261	0.598784	0.0512821															80.6831	0.18845	0.115385			0.191389	0.234234	0.0440252			0.191389	0.234234	0.0440252			82.6546	0.130699	0.0705128
			0.0814713	0.595745	0.0512821															80.6998	0.18845	0.108974			0.192123	0.231231	0.0440252			0.192123	0.231231	0.0440252			82.661	0.12766	0.0705128
			0.0824074	0.592705	0.0512821															80.7133	0.18541	0.108974			0.192493	0.228228	0.0440252			0.192493	0.228228	0.0440252			82.7093	0.12462	0.0705128
			0.0829538	0.589666	0.0512821															80.7198	0.182371	0.108974			0.192864	0.225225	0.0440252			0.192864	0.225225	0.0440252			82.756	0.121581	0.0705128
			0.0834734	0.586626	0.0512821															80.7501	0.179331	0.108974			0.193612	0.222222	0.0440252			0.193612	0.222222	0.0440252			82.8666	0.118541	0.0705128
			0.0845382	0.583587	0.0512821															80.7771	0.176292	0.108974			0.194364	0.219219	0.0440252			0.194364	0.219219	0.0440252			82.9764	0.115502	0.0705128
			0.0854703	0.580547	0.0512821															80.8048	0.173252	0.108974			0.195124	0.216216	0.0440252			0.195124	0.216216	0.0440252			82.983	0.112462	0.0705128
			0.0859861	0.577508	0.0512821															80.8998	0.170213	0.108974			0.196857	0.213213	0.0440252			0.196857	0.213213	0.0440252			82.9936	0.109422	0.0705128
			0.0866562	0.574468	0.0512821															81.0465	0.167173	0.108974			0.198611	0.21021	0.0440252			0.198611	0.21021	0.0440252			83.0204	0.106383	0.0705128
			0.087726	0.571429	0.0512821															81.1548	0.164134	0.108974			0.199402	0.207207	0.0440252			0.199402	0.207207	0.0440252			83.0584	0.103343	0.0705128
			0.0890507	0.568389	0.0512821															81.198	0.164134	0.102564			0.1998	0.201201	0.0440252			0.1998	0.201201	0.0440252			83.1169	0.100304	0.0705128
			0.0898074	0.56535	0.0512821															81.2619	0.161094	0.102564			0.20101	0.198198	0.0440252			0.20101	0.198198	0.0440252			83.1891	0.0972644	0.0705128
			0.0907083	0.56231	0.0512821															81.3605	0.161094	0.0961538			0.202636	0.195195	0.0440252			0.202636	0.195195	0.0440252			83.2878	0.0942249	0.0705128
			0.0919146	0.559271	0.0512821															81.443	0.161094	0.0897436			0.203459	0.192192	0.0440252			0.203459	0.192192	0.0440252			83.3598	0.0911854	0.0705128
			0.0937845	0.556231	0.0512821															81.519	0.161094	0.0833333			0.204714	0.189189	0.0440252			0.204714	0.189189	0.0440252			83.4454	0.0881459	0.0705128
			0.0963067	0.553191	0.0512821															81.6294	0.161094	0.0769231			0.206186	0.186186	0.0440252			0.206186	0.186186	0.0440252			83.5962	0.0851064	0.0705128
			0.0977526	0.553191	0.0448718															81.706	0.158055	0.0769231			0.206825	0.183183	0.0440252			0.206825	0.183183	0.0440252			83.6771	0.0820669	0.0705128
			0.098672	0.550152	0.0448718															81.7266	0.155015	0.0769231			0.20747	0.18018	0.0440252			0.20747	0.18018	0.0440252			83.7831	0.0790274	0.0705128
			0.0995526	0.547112	0.0448718															81.7433	0.151976	0.0769231			0.208117	0.177177	0.0440252			0.208117	0.177177	0.0440252			83.931	0.0790274	0.0641026
			0.0999502	0.544073	0.0448718															81.8352	0.148936	0.0769231			0.208551	0.174174	0.0440252			0.208551	0.174174	0.0440252			84.0215	0.0790274	0.0576923
			0.100352	0.541033	0.0448718															81.9622	0.145897	0.0769231			0.210316	0.171171	0.0440252			0.210316	0.171171	0.0440252			84.1339	0.0759878	0.0576923
			0.100705	0.537994	0.0448718															82.0042	0.145897	0.0705128			0.213459	0.168168	0.0440252			0.213459	0.168168	0.0440252			84.2131	0.0729483	0.0576923
			0.101062	0.534954	0.0448718															82.126	0.142857	0.0705128			0.217659	0.165165	0.0440252			0.217659	0.165165	0.0440252			84.2455	0.0699088	0.0576923
			0.101627	0.531915	0.0448718															82.3733	0.139818	0.0705128			0.221739	0.162162	0.0440252			0.221739	0.162162	0.0440252			84.3286	0.0668693	0.0576923
			0.102198	0.528875	0.0448718															82.5184	0.136778	0.0705128			0.223715	0.159159	0.0440252			0.223715	0.159159	0.0440252			84.4607	0.0638298	0.0576923
			0.102936	0.525836	0.0448718															82.5935	0.133739	0.0705128			0.224974	0.156156	0.0440252			0.224974	0.156156	0.0440252			84.5707	0.0607903	0.0576923
			0.103735	0.522796	0.0448718															82.6546	0.130699	0.0705128			0.226246	0.153153	0.0440252			0.226246	0.153153	0.0440252			84.6729	0.0577508	0.0576923
			0.104221	0.519757	0.0448718															82.661	0.12766	0.0705128			0.229388	0.15015	0.0440252			0.229388	0.15015	0.0440252			84.7791	0.0547112	0.0576923
			0.104879	0.516717	0.0448718															82.7093	0.12462	0.0705128			0.232288	0.147147	0.0440252			0.232288	0.147147	0.0440252			84.9688	0.0516717	0.0576923
			0.105541	0.513678	0.0448718															82.756	0.121581	0.0705128			0.232829	0.141141	0.0440252			0.232829	0.141141	0.0440252			85.1903	0.0516717	0.0512821
			0.106159	0.510638	0.0448718															82.8666	0.118541	0.0705128			0.233646	0.138138	0.0440252			0.233646	0.138138	0.0440252			85.346	0.0486322	0.0512821
			0.107535	0.507599	0.0448718															82.9764	0.115502	0.0705128			0.234743	0.135135	0.0440252			0.234743	0.135135	0.0440252			85.486	0.0455927	0.0512821
			0.108756	0.504559	0.0448718															82.983	0.112462	0.0705128			0.236412	0.132132	0.0440252			0.236412	0.132132	0.0440252			85.614	0.0425532	0.0512821
			0.109592	0.50152	0.0448718															82.9936	0.109422	0.0705128			0.238669	0.129129	0.0440252			0.238669	0.129129	0.0440252			85.7805	0.0395137	0.0512821
			0.110254	0.49848	0.0448718															83.0204	0.106383	0.0705128			0.240096	0.126126	0.0440252			0.240096	0.126126	0.0440252			85.94	0.0395137	0.0448718
			0.110497	0.495441	0.0448718															83.0584	0.103343	0.0705128			0.242741	0.12012	0.0440252			0.242741	0.12012	0.0440252			86.2527	0.0364742	0.0448718
			0.110865	0.492401	0.0448718															83.1169	0.100304	0.0705128			0.245399	0.117117	0.0440252			0.245399	0.117117	0.0440252			86.5821	0.0364742	0.0384615
			0.113159	0.489362	0.0448718															83.1891	0.0972644	0.0705128			0.246307	0.114114	0.0440252			0.246307	0.114114	0.0440252			86.6747	0.0364742	0.0320513
			0.11534	0.486322	0.0448718															83.2878	0.0942249	0.0705128			0.248145	0.111111	0.0440252			0.248145	0.111111	0.0440252			86.8172	0.0364742	0.025641
			0.116148	0.483283	0.0448718															83.3598	0.0911854	0.0705128			0.250002	0.108108	0.0440252			0.250002	0.108108	0.0440252			86.9911	0.0334347	0.025641
			0.117028	0.480243	0.0448718															83.4454	0.0881459	0.0705128			0.25254	0.105105	0.0440252			0.25254	0.105105	0.0440252			87.0547	0.0303951	0.025641
			0.117999	0.477204	0.0448718															83.5962	0.0851064	0.0705128			0.255432	0.0990991	0.0440252			0.255432	0.0990991	0.0440252			87.1196	0.0303951	0.0192308
			0.118835	0.474164	0.0448718															83.6771	0.0820669	0.0705128			0.257739	0.0960961	0.0440252			0.257739	0.0960961	0.0440252			87.3356	0.0273556	0.0192308
			0.118977	0.471125	0.0448718															83.7831	0.0790274	0.0705128			0.259404	0.0930931	0.0440252			0.259404	0.0930931	0.0440252			87.7808	0.0243161	0.0192308
			0.119119	0.468085	0.0448718															83.931	0.0790274	0.0641026			0.264641	0.0870871	0.0440252			0.264641	0.0870871	0.0440252			88.1969	0.0212766	0.0192308
			0.119547	0.465046	0.0448718															84.0215	0.0790274	0.0576923			0.271011	0.0840841	0.0440252			0.271011	0.0840841	0.0440252			88.5348	0.0212766	0.0128205
			0.120339	0.462006	0.0448718															84.1339	0.0759878	0.0576923			0.273226	0.0810811	0.0440252			0.273226	0.0810811	0.0440252			88.8809	0.0212766	0.00641026
			0.122115	0.458967	0.0448718															84.2131	0.0729483	0.0576923			0.274349	0.0780781	0.0440252			0.274349	0.0780781	0.0440252			89.4839	0.0182371	0.00641026
			0.123917	0.455927	0.0448718															84.2455	0.0699088	0.0576923			0.275104	0.0750751	0.0440252			0.275104	0.0750751	0.0440252			90.2777	0.0151976	0.00641026
			0.125003	0.452888	0.0448718															84.3286	0.0668693	0.0576923			0.281419	0.0720721	0.0440252			0.281419	0.0720721	0.0440252			90.9243	0.0121581	0.00641026
			0.125866	0.446809	0.0448718															84.4607	0.0638298	0.0576923			0.289027	0.0690691	0.0440252			0.289027	0.0690691	0.0440252			91.3415	0.00911854	0.00641026
			0.126746	0.443769	0.0448718															84.5707	0.0607903	0.0576923			0.291976	0.0660661	0.0440252			0.291976	0.0660661	0.0440252			91.6201	0.00607903	0.00641026
			0.127962	0.43769	0.0448718															84.6729	0.0577508	0.0576923			0.294557	0.0600601	0.0440252			0.294557	0.0600601	0.0440252			91.9963	0.00607903	0
			0.128617	0.43465	0.0448718															84.7791	0.0547112	0.0576923			0.298079	0.0570571	0.0440252			0.298079	0.0570571	0.0440252		eGFR	92.4526	0.00303951	0
			0.12937	0.431611	0.0448718															84.9688	0.0516717	0.0576923			0.304949	0.0540541	0.0440252			0.304949	0.0540541	0.0440252			93.6959	0	0
			0.130379	0.428571	0.0448718															85.1903	0.0516717	0.0512821			0.311539	0.0510511	0.0440252			0.311539	0.0510511	0.0440252			3.25543	1	1
			0.13089	0.425532	0.0448718															85.346	0.0486322	0.0512821			0.314968	0.048048	0.0440252			0.314968	0.048048	0.0440252			5.16155	1	0.99359
			0.131148	0.419453	0.0448718															85.486	0.0455927	0.0512821			0.318484	0.045045	0.0440252			0.318484	0.045045	0.0440252			6.17874	0.99696	0.99359
			0.131493	0.416413	0.0448718															85.614	0.0425532	0.0512821			0.321028	0.042042	0.0440252			0.321028	0.042042	0.0440252			6.35524	0.99696	0.987179
			0.133353	0.413374	0.0448718															85.7805	0.0395137	0.0512821			0.326335	0.039039	0.0440252			0.326335	0.039039	0.0440252			6.47563	0.99696	0.980769
			0.136728	0.407295	0.0448718															85.94	0.0395137	0.0448718			0.342868	0.036036	0.0440252			0.342868	0.036036	0.0440252			6.57356	0.99696	0.974359
			0.1386	0.404255	0.0448718															86.2527	0.0364742	0.0448718			0.355241	0.033033	0.0440252			0.355241	0.033033	0.0440252			7.00788	0.993921	0.974359
			0.139278	0.401216	0.0448718															86.5821	0.0364742	0.0384615			0.357147	0.03003	0.0440252			0.357147	0.03003	0.0440252			7.6186	0.990881	0.974359
			0.140353	0.398176	0.0448718															86.6747	0.0364742	0.0320513			0.359211	0.024024	0.0440252			0.359211	0.024024	0.0440252			7.87077	0.987842	0.974359
			0.141044	0.395137	0.0448718															86.8172	0.0364742	0.025641			0.361818	0.024024	0.0251572			0.361818	0.024024	0.0251572			8.25708	0.984802	0.974359
			0.141443	0.392097	0.0448718															86.9911	0.0334347	0.025641			0.364968	0.021021	0.0251572			0.364968	0.021021	0.0251572			9.72675	0.984802	0.967949
			0.141744	0.389058	0.0448718															87.0547	0.0303951	0.025641			0.370416	0.018018	0.0251572			0.370416	0.018018	0.0251572			11.192	0.981763	0.967949
			0.142147	0.386018	0.0448718															87.1196	0.0303951	0.0192308			0.380316	0.015015	0.0251572			0.380316	0.015015	0.0251572			11.7175	0.978723	0.967949
			0.142756	0.382979	0.0448718															87.3356	0.0273556	0.0192308			0.392253	0.012012	0.0251572			0.392253	0.012012	0.0251572			13.4503	0.978723	0.961538
			0.143164	0.379939	0.0448718															87.7808	0.0243161	0.0192308			0.399203	0.00900901	0.0251572			0.399203	0.00900901	0.0251572			15.0562	0.978723	0.955128
			0.143679	0.3769	0.0448718															88.1969	0.0212766	0.0192308			0.42	0.00600601	0.0188679			0.42	0.00600601	0.0188679			17.1002	0.978723	0.948718
			0.14451	0.37386	0.0448718															88.5348	0.0212766	0.0128205			0.451481	0.00600601	0			0.451481	0.00600601	0			19.2712	0.975684	0.948718
			0.145033	0.370821	0.0448718															88.8809	0.0212766	0.00641026			0.54204	0.003003	0			0.54204	0.003003	0			19.6673	0.975684	0.942308
			0.145349	0.367781	0.0448718															89.4839	0.0182371	0.00641026													20.909	0.975684	0.935897
			0.14588	0.364742	0.0448718															90.2777	0.0151976	0.00641026													23.4212	0.975684	0.929487
			0.146413	0.358663	0.0448718															90.9243	0.0121581	0.00641026													25.3746	0.975684	0.923077
			0.147829	0.355623	0.0448718															91.3415	0.00911854	0.00641026													26.5941	0.975684	0.916667
			0.149817	0.352584	0.0448718															91.6201	0.00607903	0.00641026													27.6374	0.975684	0.910256
			0.15083	0.349544	0.0448718															91.9963	0.00607903	0													28.0143	0.975684	0.903846
			0.151632	0.346505	0.0448718														acr倒数	92.4526	0.00303951	0													28.118	0.975684	0.897436
			0.152323	0.343465	0.0448718															93.6959	0	0													29.1211	0.975684	0.891026
			0.152907	0.340426	0.0448718															-1	1	1													30.8713	0.975684	0.884615
			0.154812	0.337386	0.0448718															3.22414e-05	0.984802	1													31.6544	0.972644	0.884615
			0.156618	0.334347	0.0448718															0.000105006	0.984802	0.99359													32.1816	0.972644	0.878205
			0.157233	0.331307	0.0448718															0.000151681	0.984802	0.987179													33.4598	0.972644	0.871795
			0.158231	0.328267	0.0448718															0.000177549	0.984802	0.980769													34.4703	0.972644	0.865385
			0.159236	0.325228	0.0448718															0.000211001	0.984802	0.974359													34.8997	0.969605	0.865385
			0.16052	0.319149	0.0448718															0.000226668	0.984802	0.967949													35.2032	0.969605	0.858974
			0.161813	0.316109	0.0448718															0.00023364	0.984802	0.961538													35.4099	0.969605	0.852564
			0.163274	0.31307	0.0448718															0.000261918	0.984802	0.955128													35.5127	0.966565	0.852564
			0.164609	0.31003	0.0448718															0.000293875	0.984802	0.948718													35.6335	0.966565	0.846154
			0.164881	0.306991	0.0448718															0.000313732	0.984802	0.942308													35.8109	0.966565	0.839744
			0.165153	0.303951	0.0448718															0.000340306	0.984802	0.935897													36.1162	0.963526	0.839744
			0.165426	0.300912	0.0448718															0.000371707	0.984802	0.929487													36.7908	0.963526	0.833333
			0.166393	0.297872	0.0448718															0.000393499	0.984802	0.923077													37.5236	0.963526	0.826923
			0.167364	0.294833	0.0448718															0.000401745	0.984802	0.916667													38.3885	0.963526	0.820513
			0.167645	0.291793	0.0448718															0.00041776	0.984802	0.910256													38.9753	0.963526	0.814103
			0.167926	0.288754	0.0448718															0.000432186	0.984802	0.903846													39.0886	0.963526	0.807692
			0.168636	0.282675	0.0448718															0.00043443	0.984802	0.897436													39.5425	0.963526	0.801282
			0.170958	0.279635	0.0448718															0.000439542	0.984802	0.891026													39.9099	0.963526	0.794872
			0.173161	0.276596	0.0448718															0.000459135	0.984802	0.884615													40.1405	0.960486	0.794872
			0.173914	0.273556	0.0448718															0.000516154	0.984802	0.878205													40.5895	0.960486	0.788462
			0.174827	0.270517	0.0448718															0.000574693	0.984802	0.871795													41.0004	0.960486	0.782051
			0.176372	0.267477	0.0448718															0.000611491	0.984802	0.865385													41.2968	0.960486	0.775641
			0.17762	0.261398	0.0448718															0.000646818	0.984802	0.858974													41.5047	0.957447	0.775641
			0.178254	0.258359	0.0448718															0.000664481	0.984802	0.852564													41.7442	0.954407	0.775641
			0.179052	0.255319	0.0448718															0.000673928	0.984802	0.846154													42.4677	0.954407	0.769231
			0.180183	0.25228	0.0448718															0.000720112	0.984802	0.839744													43.0596	0.954407	0.762821
			0.181325	0.24924	0.0448718															0.000774604	0.984802	0.833333													43.3671	0.954407	0.75641
			0.184019	0.246201	0.0448718															0.000812705	0.984802	0.826923													43.7592	0.954407	0.75
			0.186918	0.243161	0.0448718															0.000850993	0.984802	0.820513													43.8749	0.954407	0.74359
			0.188148	0.240122	0.0448718															0.000878684	0.984802	0.814103													44.2508	0.954407	0.737179
			0.189216	0.237082	0.0448718															0.000894754	0.984802	0.807692													44.7259	0.954407	0.730769
			0.190297	0.234043	0.0448718															0.000910735	0.984802	0.801282													44.891	0.951368	0.730769
			0.191389	0.231003	0.0448718															0.000988169	0.984802	0.794872													45.0513	0.951368	0.724359
			0.192123	0.227964	0.0448718															0.00106943	0.984802	0.788462													45.2911	0.948328	0.724359
			0.192493	0.224924	0.0448718															0.00113399	0.984802	0.782051													45.5513	0.945289	0.724359
			0.192864	0.221884	0.0448718															0.00118495	0.984802	0.775641													45.797	0.945289	0.717949
			0.193612	0.218845	0.0448718															0.00120886	0.984802	0.769231													45.9476	0.942249	0.717949
			0.194364	0.215805	0.0448718															0.00126432	0.984802	0.762821													46.019	0.942249	0.711538
			0.195124	0.212766	0.0448718															0.00137227	0.984802	0.75641													46.2287	0.93921	0.711538
			0.196857	0.209726	0.0448718															0.00149843	0.984802	0.75													46.4552	0.93921	0.705128
			0.198611	0.206687	0.0448718															0.00158582	0.984802	0.74359													46.5418	0.93921	0.698718
			0.199402	0.203647	0.0448718															0.00168595	0.984802	0.737179													46.5913	0.93921	0.692308
			0.1998	0.197568	0.0448718															0.0017564	0.984802	0.730769													46.8191	0.93617	0.692308
			0.20101	0.194529	0.0448718															0.00177573	0.984802	0.724359													47.1486	0.933131	0.692308
			0.202636	0.191489	0.0448718															0.00189496	0.984802	0.717949													47.3235	0.933131	0.685897
			0.203459	0.18845	0.0448718															0.00204616	0.984802	0.711538													47.4531	0.930091	0.685897
			0.204714	0.18541	0.0448718															0.00213784	0.984802	0.705128													47.7445	0.930091	0.679487
			0.206186	0.182371	0.0448718															0.00220929	0.984802	0.698718													47.9812	0.924012	0.679487
			0.206825	0.179331	0.0448718															0.00224632	0.981763	0.698718													48.0017	0.924012	0.673077
			0.20747	0.176292	0.0448718															0.00239982	0.978723	0.698718													48.0659	0.920973	0.673077
			0.208117	0.173252	0.0448718															0.00267719	0.978723	0.692308													48.2005	0.920973	0.666667
			0.208551	0.170213	0.0448718															0.00281563	0.975684	0.692308													48.3718	0.920973	0.660256
			0.210316	0.167173	0.0448718															0.00298831	0.972644	0.692308													48.878	0.920973	0.653846
			0.213459	0.164134	0.0448718															0.00335728	0.972644	0.685897													49.2949	0.920973	0.647436
			0.217659	0.161094	0.0448718															0.00357111	0.972644	0.679487													49.3241	0.920973	0.641026
			0.221739	0.158055	0.0448718															0.00359358	0.972644	0.673077													49.4646	0.920973	0.634615
			0.223715	0.155015	0.0448718															0.00361112	0.972644	0.666667													49.6226	0.920973	0.628205
			0.224974	0.151976	0.0448718															0.00367211	0.972644	0.660256													49.7715	0.917933	0.628205
			0.226246	0.148936	0.0448718															0.003835	0.972644	0.653846													50.1428	0.917933	0.621795
			0.229388	0.145897	0.0448718															0.00394914	0.972644	0.647436													50.4342	0.914894	0.621795
			0.232288	0.142857	0.0448718															0.00399873	0.972644	0.641026													50.5981	0.911854	0.621795
			0.232829	0.136778	0.0448718															0.00405426	0.972644	0.634615													50.7623	0.911854	0.615385
			0.233646	0.133739	0.0448718															0.00410926	0.969605	0.634615													50.8525	0.908815	0.615385
			0.235861	0.130699	0.0448718															0.00428583	0.969605	0.628205													50.9841	0.908815	0.608974
			0.238669	0.12766	0.0448718															0.00445591	0.969605	0.621795													51.1968	0.908815	0.602564
			0.240096	0.12462	0.0448718															0.00451958	0.969605	0.615385													51.353	0.905775	0.602564
			0.242741	0.118541	0.0448718															0.00463882	0.969605	0.608974													51.3836	0.905775	0.596154
			0.245399	0.115502	0.0448718															0.00474849	0.969605	0.602564													51.4351	0.902736	0.596154
			0.246307	0.112462	0.0448718															0.00484328	0.969605	0.596154													51.5635	0.899696	0.596154
			0.248145	0.109422	0.0448718															0.00499718	0.969605	0.589744													51.895	0.896657	0.596154
			0.250002	0.106383	0.0448718															0.00517338	0.969605	0.583333													52.1434	0.896657	0.589744
			0.25254	0.103343	0.0448718															0.00531175	0.969605	0.576923													52.2582	0.893617	0.589744
			0.255432	0.0972644	0.0448718															0.0053506	0.969605	0.570513													52.4009	0.890578	0.589744
			0.257739	0.0942249	0.0448718															0.00540693	0.966565	0.570513													52.579	0.890578	0.583333
			0.259404	0.0911854	0.0448718															0.00562576	0.966565	0.564103													52.7477	0.884498	0.583333
			0.264641	0.0881459	0.0448718															0.00591571	0.966565	0.557692													52.8798	0.881459	0.583333
			0.271011	0.0851064	0.0448718															0.00617169	0.966565	0.551282													53.0231	0.878419	0.583333
			0.273226	0.0820669	0.0448718															0.00630557	0.966565	0.544872													53.1205	0.878419	0.576923
			0.274349	0.0790274	0.0448718															0.00637006	0.966565	0.538462													53.1792	0.878419	0.570513
			0.275104	0.0759878	0.0448718															0.00655602	0.966565	0.532051													53.2425	0.87538	0.570513
			0.281419	0.0729483	0.0448718															0.00679453	0.966565	0.525641													53.4377	0.87234	0.564103
			0.289027	0.0699088	0.0448718															0.00701315	0.966565	0.519231													53.6369	0.869301	0.564103
			0.291976	0.0668693	0.0448718															0.00714425	0.966565	0.512821													53.7103	0.866261	0.564103
			0.294557	0.0607903	0.0448718															0.00720135	0.966565	0.50641													53.7563	0.863222	0.564103
			0.298079	0.0577508	0.0448718															0.00730947	0.966565	0.5													53.818	0.860182	0.564103
			0.304949	0.0547112	0.0448718															0.00749755	0.966565	0.49359													53.9202	0.857143	0.564103
			0.311539	0.0516717	0.0448718															0.00766953	0.963526	0.49359													54.0184	0.857143	0.557692
			0.314968	0.0486322	0.0448718															0.00774385	0.963526	0.487179													54.06	0.857143	0.551282
			0.318484	0.0455927	0.0448718															0.00786949	0.963526	0.480769													54.0991	0.854103	0.551282
			0.321028	0.0425532	0.0448718															0.0080055	0.960486	0.480769													54.1598	0.848024	0.551282
			0.326335	0.0395137	0.0448718															0.00817772	0.957447	0.480769													54.3355	0.848024	0.544872
			0.342868	0.0364742	0.0448718															0.00836133	0.957447	0.474359													54.5851	0.848024	0.538462
			0.355241	0.0334347	0.0448718															0.00842614	0.957447	0.467949													54.8587	0.844985	0.538462
			0.357147	0.0303951	0.0448718															0.00847894	0.957447	0.461538													55.1843	0.844985	0.532051
			0.359211	0.0243161	0.0448718															0.00850884	0.957447	0.455128													55.5834	0.841945	0.532051
			0.361818	0.0243161	0.025641															0.00861359	0.957447	0.448718													55.8629	0.838906	0.532051
			0.364968	0.0212766	0.025641															0.00895277	0.957447	0.442308													55.9346	0.835866	0.532051
			0.370416	0.0182371	0.025641															0.00936094	0.957447	0.435897													56.0228	0.835866	0.525641
			0.380316	0.0151976	0.025641															0.00967103	0.957447	0.429487													56.2303	0.832827	0.525641
			0.392253	0.0121581	0.025641															0.00984454	0.957447	0.423077													56.4069	0.829787	0.525641
			0.399203	0.00911854	0.025641															0.00989172	0.957447	0.416667													56.5561	0.829787	0.519231
			0.42	0.00607903	0.0192308															0.0099554	0.957447	0.410256													56.679	0.826748	0.519231
			0.451481	0.00607903	0															0.0100413	0.93617	0.410256													56.7206	0.823708	0.519231
		eGFR	0.54204	0.00303951	0															0.0101949	0.93617	0.403846													56.8555	0.820669	0.519231
			1.62112	0	0															0.0105012	0.93617	0.397436													57.0753	0.820669	0.512821
			3.25543	1	1															0.0108829	0.93617	0.391026													57.2073	0.817629	0.512821
			5.16155	1	0.99359															0.0113573	0.93617	0.384615													57.2905	0.817629	0.50641
			6.17874	0.99696	0.99359															0.0117681	0.933131	0.384615													57.4637	0.817629	0.5
			6.35524	0.99696	0.987179															0.0119563	0.933131	0.378205													57.5696	0.817629	0.49359
			6.47563	0.99696	0.980769															0.0122207	0.933131	0.371795													57.6148	0.81459	0.49359
			6.57356	0.99696	0.974359															0.0127022	0.930091	0.371795													57.6593	0.81155	0.49359
			7.00788	0.993921	0.974359															0.0130466	0.927052	0.371795													57.6752	0.808511	0.49359
			7.6186	0.990881	0.974359															0.0132268	0.927052	0.365385													57.7195	0.805471	0.49359
			7.87077	0.987842	0.974359															0.0135045	0.927052	0.358974													57.9776	0.802432	0.49359
			8.25708	0.984802	0.974359															0.0136978	0.927052	0.352564													58.2331	0.802432	0.487179
			9.72675	0.984802	0.967949															0.0147269	0.927052	0.346154													58.4317	0.802432	0.480769
			11.192	0.981763	0.967949															0.0157543	0.927052	0.339744													58.6695	0.799392	0.480769
			11.7175	0.978723	0.967949															0.0159533	0.927052	0.333333													58.8894	0.796353	0.480769
			13.4503	0.978723	0.961538															0.0162829	0.927052	0.326923													59.0672	0.793313	0.480769
			15.0562	0.978723	0.955128															0.0165321	0.927052	0.320513													59.2634	0.790274	0.480769
			17.1002	0.978723	0.948718															0.0168583	0.927052	0.314103													59.4391	0.790274	0.474359
			19.2712	0.975684	0.948718															0.0171175	0.927052	0.307692													59.5267	0.787234	0.474359
			19.6673	0.975684	0.942308															0.0172813	0.927052	0.301282													59.7228	0.787234	0.467949
			20.909	0.975684	0.935897															0.0174353	0.927052	0.294872													59.8987	0.787234	0.461538
			23.4212	0.975684	0.929487															0.0175335	0.927052	0.288462													60.1314	0.784195	0.461538
			25.3746	0.975684	0.923077															0.0176336	0.927052	0.282051													60.4326	0.781155	0.461538
			26.5941	0.975684	0.916667															0.0176679	0.927052	0.275641													60.5743	0.778116	0.461538
			27.6374	0.975684	0.910256															0.0181024	0.927052	0.269231													60.645	0.778116	0.455128
			28.0143	0.975684	0.903846															0.0185929	0.927052	0.262821													60.7841	0.775076	0.455128
			28.118	0.975684	0.897436															0.0188212	0.927052	0.25641													60.8897	0.772036	0.455128
			29.1211	0.975684	0.891026															0.0194242	0.927052	0.25													60.9535	0.768997	0.455128
			30.8713	0.975684	0.884615															0.0199384	0.927052	0.24359													61.0395	0.765957	0.455128
			31.6544	0.972644	0.884615															0.0201358	0.920973	0.24359													61.1086	0.762918	0.455128
			32.1816	0.972644	0.878205															0.0202758	0.920973	0.237179													61.1484	0.762918	0.448718
			33.4598	0.972644	0.871795															0.0205914	0.920973	0.230769													61.1733	0.759878	0.448718
			34.4703	0.972644	0.865385															0.0209118	0.920973	0.224359													61.2202	0.756839	0.448718
			34.8997	0.969605	0.865385															0.0209336	0.920973	0.217949													61.5515	0.753799	0.448718
			35.2032	0.969605	0.858974															0.0209666	0.920973	0.211538													61.8451	0.753799	0.442308
			35.4099	0.969605	0.852564															0.0211519	0.917933	0.211538													61.875	0.75076	0.442308
			35.5127	0.966565	0.852564															0.021322	0.914894	0.211538													61.9053	0.74772	0.442308
			35.6335	0.966565	0.846154															0.0214252	0.914894	0.205128													61.9186	0.744681	0.442308
			35.8109	0.966565	0.839744															0.0218558	0.914894	0.198718													61.9313	0.741641	0.442308
			36.1162	0.963526	0.839744															0.0222248	0.911854	0.198718													62.0207	0.741641	0.435897
			36.7908	0.963526	0.833333															0.022523	0.911854	0.192308													62.1205	0.738602	0.435897
			37.5236	0.963526	0.826923															0.0229315	0.911854	0.185897													62.2095	0.735562	0.435897
			38.3885	0.963526	0.820513															0.0231134	0.908815	0.185897													62.3256	0.735562	0.429487
			38.9753	0.963526	0.814103															0.0231831	0.908815	0.179487													62.4153	0.732523	0.429487
			39.0886	0.963526	0.807692															0.0232261	0.905775	0.179487													62.5826	0.729483	0.429487
			39.5425	0.963526	0.801282															0.023313	0.905775	0.173077													62.7146	0.729483	0.423077
			39.9099	0.963526	0.794872															0.0237151	0.902736	0.173077													62.8428	0.726444	0.423077
			40.1405	0.960486	0.794872															0.0241258	0.899696	0.173077													62.9966	0.723404	0.423077
			40.5895	0.960486	0.788462															0.0243584	0.899696	0.166667													63.0472	0.723404	0.416667
			41.0004	0.960486	0.782051															0.0245793	0.899696	0.160256													63.0703	0.720365	0.416667
			41.2968	0.960486	0.775641															0.0249473	0.899696	0.153846													63.1449	0.717325	0.416667
			41.5047	0.957447	0.775641															0.0254207	0.896657	0.153846													63.2316	0.714286	0.416667
			41.7442	0.954407	0.775641															0.025771	0.896657	0.147436													63.3101	0.711246	0.416667
			42.4677	0.954407	0.769231															0.0263284	0.896657	0.141026													63.3659	0.708207	0.416667
			43.0596	0.954407	0.762821															0.0268027	0.893617	0.141026													63.3709	0.705167	0.416667
			43.3671	0.954407	0.75641															0.0271094	0.893617	0.134615													63.7441	0.702128	0.416667
			43.7592	0.954407	0.75															0.0275886	0.890578	0.134615													64.1706	0.702128	0.410256
			43.8749	0.954407	0.74359															0.0278668	0.887538	0.134615													64.2668	0.702128	0.403846
			44.2508	0.954407	0.737179															0.0278979	0.887538	0.128205													64.3124	0.699088	0.403846
			44.7259	0.954407	0.730769															0.0279525	0.887538	0.121795													64.4461	0.696049	0.403846
			44.891	0.951368	0.730769															0.0280427	0.887538	0.115385													64.6092	0.696049	0.397436
			45.0513	0.951368	0.724359															0.0289082	0.884498	0.115385													64.7477	0.693009	0.397436
			45.2911	0.948328	0.724359															0.0301351	0.884498	0.108974													64.8629	0.68997	0.397436
			45.5513	0.945289	0.724359															0.030567	0.884498	0.102564													64.9726	0.68693	0.397436
			45.797	0.945289	0.717949															0.0306751	0.884498	0.0961538													65.1051	0.683891	0.397436
			45.9476	0.942249	0.717949															0.0309175	0.884498	0.0897436													65.1566	0.680851	0.397436
			46.019	0.942249	0.711538															0.0315838	0.881459	0.0897436													65.2634	0.680851	0.391026
			46.2287	0.93921	0.711538															0.0325533	0.878419	0.0897436													65.451	0.680851	0.384615
			46.4552	0.93921	0.705128															0.0330908	0.878419	0.0833333													65.5561	0.680851	0.378205
			46.5418	0.93921	0.698718															0.0332671	0.878419	0.0769231													65.5925	0.677812	0.378205
			46.5913	0.93921	0.692308															0.0335752	0.87538	0.0769231													65.6317	0.674772	0.378205
			46.8191	0.93617	0.692308															0.0339045	0.87234	0.0769231													65.6648	0.671733	0.378205
			47.1486	0.933131	0.692308															0.034031	0.869301	0.0769231													65.7389	0.668693	0.378205
			47.3235	0.933131	0.685897															0.0340774	0.866261	0.0769231													65.9845	0.665653	0.378205
			47.4531	0.930091	0.685897															0.034153	0.863222	0.0769231													66.2999	0.665653	0.371795
			47.7445	0.930091	0.679487															0.0344612	0.860182	0.0769231													66.4468	0.662614	0.371795
			47.9812	0.924012	0.679487															0.034911	0.857143	0.0769231													66.537	0.659574	0.371795
			48.0017	0.924012	0.673077															0.0353185	0.854103	0.0769231													66.6659	0.656535	0.371795
			48.0659	0.920973	0.673077															0.0356126	0.851064	0.0769231													66.8238	0.653495	0.371795
			48.2005	0.920973	0.666667															0.036053	0.848024	0.0769231													67.0066	0.650456	0.371795
			48.3718	0.920973	0.660256															0.0365703	0.844985	0.0769231													67.32	0.647416	0.371795
			48.878	0.920973	0.653846															0.0377277	0.838906	0.0769231													67.5494	0.644377	0.371795
			49.2949	0.920973	0.647436															0.0391586	0.838906	0.0705128													67.6258	0.641337	0.371795
			49.3241	0.920973	0.641026															0.0398586	0.835866	0.0705128													67.743	0.638298	0.371795
			49.4646	0.920973	0.634615															0.040348	0.832827	0.0705128													67.9008	0.638298	0.365385
			49.6226	0.920973	0.628205															0.0408604	0.829787	0.0705128													68.0316	0.638298	0.358974
			49.7715	0.917933	0.628205															0.0416195	0.826748	0.0705128													68.1582	0.635258	0.358974
			50.1428	0.917933	0.621795															0.0422303	0.823708	0.0705128													68.2767	0.632219	0.358974
			50.4342	0.914894	0.621795															0.0424268	0.820669	0.0705128													68.3831	0.629179	0.358974
			50.5981	0.911854	0.621795															0.0428484	0.817629	0.0705128													68.4821	0.629179	0.352564
			50.7623	0.911854	0.615385															0.0435757	0.81459	0.0705128													68.5446	0.62614	0.352564
			50.8525	0.908815	0.615385															0.0445627	0.81155	0.0705128													68.6108	0.6231	0.352564
			50.9841	0.908815	0.608974															0.0452694	0.808511	0.0705128													68.6633	0.6231	0.346154
			51.1968	0.908815	0.602564															0.0455278	0.805471	0.0705128													68.7214	0.620061	0.346154
			51.353	0.905775	0.602564															0.0459464	0.802432	0.0705128													68.8076	0.620061	0.339744
			51.3836	0.905775	0.596154															0.0462322	0.802432	0.0641026													68.8915	0.617021	0.333333
			51.4351	0.902736	0.596154															0.046307	0.799392	0.0641026													68.9861	0.617021	0.326923
			51.5635	0.899696	0.596154															0.0464906	0.796353	0.0641026													69.0785	0.617021	0.320513
			51.895	0.896657	0.596154															0.0468834	0.793313	0.0641026													69.1779	0.613982	0.320513
			52.1434	0.896657	0.589744															0.0471254	0.793313	0.0576923													69.4378	0.610942	0.320513
			52.2582	0.893617	0.589744															0.0471587	0.790274	0.0576923													69.78	0.607903	0.320513
			52.4009	0.890578	0.589744															0.0474741	0.787234	0.0576923													70.0623	0.604863	0.320513
			52.579	0.890578	0.583333															0.0478585	0.784195	0.0576923													70.219	0.601824	0.320513
			52.7477	0.884498	0.583333															0.0479616	0.781155	0.0576923													70.2813	0.598784	0.320513
			52.8798	0.881459	0.583333															0.0479962	0.778116	0.0576923													70.5319	0.598784	0.314103
			53.0231	0.878419	0.583333															0.0482875	0.775076	0.0576923													70.7908	0.595745	0.314103
			53.1205	0.878419	0.576923															0.0485909	0.772036	0.0576923													70.8682	0.592705	0.314103
			53.1792	0.878419	0.570513															0.0486856	0.768997	0.0576923													71.2814	0.592705	0.307692
			53.2425	0.87538	0.570513															0.0493036	0.765957	0.0576923													71.6471	0.589666	0.307692
			53.4377	0.87234	0.564103															0.0501015	0.762918	0.0576923													71.6893	0.586626	0.307692
			53.6369	0.869301	0.564103															0.0504288	0.762918	0.0512821													71.7428	0.586626	0.301282
			53.7103	0.866261	0.564103															0.0507758	0.759878	0.0512821													71.7962	0.583587	0.301282
			53.7563	0.863222	0.564103															0.0514434	0.756839	0.0512821													71.9104	0.580547	0.301282
			53.818	0.860182	0.564103															0.0522498	0.753799	0.0512821													71.9944	0.577508	0.301282
			53.9202	0.857143	0.564103															0.0527149	0.75076	0.0512821													72.001	0.574468	0.301282
			54.0184	0.857143	0.557692															0.0529386	0.74772	0.0512821													72.0085	0.574468	0.294872
			54.06	0.857143	0.551282															0.0532913	0.744681	0.0512821													72.0192	0.571429	0.294872
			54.0991	0.854103	0.551282															0.0535333	0.741641	0.0512821													72.1351	0.571429	0.288462
			54.1598	0.848024	0.551282															0.0536193	0.738602	0.0512821													72.3027	0.568389	0.288462
			54.3355	0.848024	0.544872															0.0536769	0.735562	0.0512821													72.4497	0.56535	0.288462
			54.5851	0.848024	0.538462															0.0537346	0.732523	0.0512821													72.5555	0.56231	0.288462
			54.8587	0.844985	0.538462															0.053865	0.729483	0.0512821													72.6343	0.559271	0.288462
			55.1843	0.844985	0.532051															0.054261	0.726444	0.0512821													72.7937	0.559271	0.282051
			55.5834	0.841945	0.532051															0.0549326	0.723404	0.0512821													73.0364	0.559271	0.275641
			55.8629	0.838906	0.532051															0.055808	0.720365	0.0512821													73.2299	0.556231	0.275641
[truncated: 355 more rows]

## Sheet: DNP ROC
												曲线的坐标
[truncated: 1,038 more rows]

## Sheet: DR ROC
				曲线下的面积
[truncated: 1,523 more rows]
