# Supplementary material for: The application of sudoscan for screening microvascular complications in patients with type 2 diabetes
Source: PeerJ. 2022 Mar 14;10:e13089. doi: 10.7717/peerj.13089 (PMC8929165; doi:10.7717/peerj.13089)
Supplement: Supplemental Information 2 [file peerj-10-13089-s002.xls]

## Sheet: Sheet1
Categorical Data	convert number	respective factor
sudoscan	0	normal
	1	abnormal
coronary heart disease	0	absence
	1	presence
hypertension	0	absence
	1	presence
cerebral infarction	0	absence
	1	presence
smoke	0	absence
	1	presence
drink	0	absence
	1	presence
DPN	0	absence
	1	presence
DR	0	absence
	1	presence
DKD	0	absence
	1	presence
diabetes foot	0	absence
	1	presence
Carotid plaque	0	absence
	1	soft plaque
	2	hard plaque
	3	mixed plaque
